# Supplementary material for: Understanding the Conformational Behavior of Fluorinated Piperidines: The Origin of the Axial‐F Preference
Source: PubMed Central journal article supplement (PMC7317880; doi:10.1002/chem.202001355), 2020-05-12

# Chemistry–A European Journal

Supporting Information

## **Understanding the Conformational Behavior of Fluorinated Piperidines: The Origin of the Axial-F Preference**

Zackaria Nairoukh<sup>+,\*</sup> Felix Strieth-Kalthoff<sup>+</sup>, Klaus Bergander, and Frank Glorius<sup>\*[a]</sup>

# **Understanding the conformational behavior of fluorinated piperidines: The origin of the axial-F orientation**

Zackaria Nairoukh\*, Felix Strieth-Kalthoff, Klaus Bergander, Frank Glorius\*

Correspondence to: [glorius@uni-muenster.de](mailto:glorius@uni-muenster.de); [z.nairoukh@mail.huji.ac.il](mailto:z.nairoukh@mail.huji.ac.il)

## **Supplementary Information**

## Table of Contents

|                                                              |     |
|--------------------------------------------------------------|-----|
| Materials and Methods                                        | 3   |
| Preparation of Fluoropiperidine Derivatives                  | 5   |
| NMR and Computational Analysis                               | 8   |
| Synthesis of All- <i>cis</i> -(multi)fluorinated Piperidines | 27  |
| References                                                   | 66  |
| Computational Data                                           | 67  |
| Geometries                                                   | 76  |
| NMR Spectra                                                  | 118 |

## Materials and Methods

All trifluoroacetyl-(TFA) and *tert*-butyloxycarbonyl-(Boc)-fluoropiperidine derivatives were prepared according to previously published procedures.<sup>1</sup> The preparation of acetyl-(Ac)- and pivaloyl-(Piv)-fluoropiperidine derivatives as well as the preparation of fluoropiperidinium hydrochloride salts and non-protonated fluoropiperidine derivatives is described in the following section.

<sup>1</sup>H and <sup>13</sup>C, and <sup>19</sup>F NMR spectra were recorded on a Bruker Avance II 300 or Avance II 400, Agilent DD2 500 or Agilent DD2 600 in the indicated solvents. Chemical shifts ( $\delta$ ) are given in ppm relative to TMS. The residual solvent signals were used as references and the chemical shifts converted to the TMS scale (CDCl<sub>3</sub>:  $\delta_{\text{H}} = 7.26$  ppm,  $\delta_{\text{C}} = 77.16$  ppm; CD<sub>2</sub>Cl<sub>2</sub>:  $\delta_{\text{H}} = 5.32$  ppm,  $\delta_{\text{C}} = 54.0$  ppm; C<sub>6</sub>D<sub>6</sub>:  $\delta_{\text{H}} = 7.16$  ppm,  $\delta_{\text{C}} = 128.06$  ppm; D<sub>2</sub>O:  $\delta_{\text{H}} = 4.79$  ppm; DMSO-*d*<sub>6</sub>:  $\delta_{\text{H}} = 2.50$  ppm,  $\delta_{\text{C}} = 39.5$  ppm). <sup>19</sup>F NMR spectra are referenced according to the proton resonance of TMS as the primary reference for the unified chemical shift scale (IUPAC recommendation 2001). ESI mass spectra were recorded on a Bruker Daltonics MicroTof spectrometer.

Typical NMR sample contains 20 mg of the measured compounds. For literature known compounds, only <sup>1</sup>H NMR spectra in different deuterated solvents are presented. For newly synthesized compounds, fully detailed NMR spectra and ESI-MS are given.

The experimental determination of the axial or equatorial orientation of the fluorine atoms on the piperidine ring was done through NMR studies. It has been shown that the vicinal <sup>3</sup>*J*(<sup>19</sup>F, <sup>1</sup>H) coupling constants provide useful insight into conformational structure, as large values of <sup>3</sup>*J*(<sup>19</sup>F, <sup>1</sup>H<sub>a</sub>) indicate axial preference and small values of <sup>3</sup>*J*(<sup>19</sup>F, <sup>1</sup>H<sub>a</sub>) indicate equatorial preference.<sup>1</sup> For determining the <sup>3</sup>*J*(<sup>19</sup>F, <sup>1</sup>H<sub>a</sub>) we applied selective, multi-selective and band-selective decoupling schemes. This was done using the Pbox provided by Vnmrj of Agilent.

Computations were carried out using the ORCA 4.1.1 software package, as developed by Neese and co-workers.<sup>2</sup> All structures are given in the .xyz format and were visualized using *Jmol*.<sup>3</sup> Gas phase geometries of the respective conformers were optimized using the M06-2X hybrid functional<sup>4</sup> in Ahlrich's def2-TZVPP basis set.<sup>5</sup> All conformers were confirmed to be local minima on the respective potential energy surface by the absence of negative eigenvalues of the Hessian after numerical harmonic frequency analysis at the same level of computation. No symmetry of internal coordinate constraints were applied. Higher energy conformers (in particular, rotamers of the respective acetyl-, pivaloyl- or carbamoyl-protected amines) were taken into account. The

electronic energy of the previously optimized geometries was then determined by an additional single-point calculation on the M06-2X / def2-QZVPP level.<sup>4,5</sup> The reported free energy values (in  $E_h$  and  $\text{kcal mol}^{-1}$ ) were then obtained as the sum of the single point electronic energies and the respective free energy corrections (ZPVE, thermal corrections, enthalpy correction, entropy correction), as obtained from the harmonic frequency analysis. Geometries and free energies for the conformers in solution were obtained accordingly. For both geometry optimization and single point calculation, solvation effects were included using the CPCM continuum solvation model (presets for benzene, dichloromethane, chloroform, dimethyl sulfoxide and water, respectively).<sup>6</sup> NBO analysis was performed using the NBO 6.0 software.<sup>7</sup> The difference in electronic energies between two conformers was attributed to a sum of hyperconjugative, steric and electrostatic contributions.

$$\Delta E_{el} = \Delta E_{\text{hyperconj}} + \underbrace{\Delta E_{\text{steric}} + \Delta E_{\text{electrostat}}}_{\Delta E_{\text{loc}}}$$

Hyperconjugative stabilization was quantified by subtracting the actual electronic energy from the energy of a hypothetical fully localized structure  $E_{\text{loc}}$ , deleting all antibonding orbitals from the electronic energy computation (`$DEL LEWIS` keyword). Steric contributions were obtained using the NBO/NLMO steric analysis (`$NBO STERIC` keyword). The residual difference in electronic energies was attributed to electrostatic interactions, neglecting potential coupling between steric and electrostatic interactions, and potential non-Lewis electrostatic interactions. Individual hyperconjugative interactions were extracted from the result of a second order perturbation theory analysis of the Fock matrix within the basis of NBOs.

## Preparation of Fluoropiperidine Derivatives

*Preparation of fluoropiperidinium hydrochloride salts (1B–12B).*

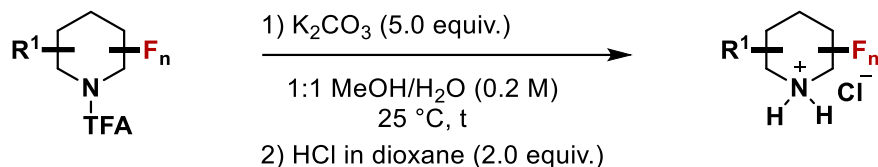

Following a literature procedure,<sup>1</sup>  $\text{K}_2\text{CO}_3$  (5.0 equiv.) was added in one portion to a solution of TFA-fluoropiperidine derivative (**1A–12A**) (1.0 equiv.) in 1:1 methanol/water (0.2 M) at room temperature. After stirring the solution for the indicated time, the reaction mixture was acidified with 2 M aqueous solution of HCl. After removal of all volatiles, 2 M aqueous solution of NaOH and  $\text{CH}_2\text{Cl}_2$  (5 mL) were added. The organic layer was separated and the aqueous layer was further extracted with  $\text{CH}_2\text{Cl}_2$  (3×5 mL). The organic layers were combined, dried over  $\text{MgSO}_4$  and filtrated. HCl (4 M in 1,4-dioxane, 2.0 equiv.) was added to the filtrate and all volatiles were removed to yield the corresponding fluoropiperidinium hydrochloride (**1B–12B**) as a white solid. NMR samples were prepared by dissolving the fluoropiperidinium adducts in  $\text{D}_2\text{O}$ .

*Preparation of non-protonated fluoropiperidine derivatives (1C–12C).*

General procedure A

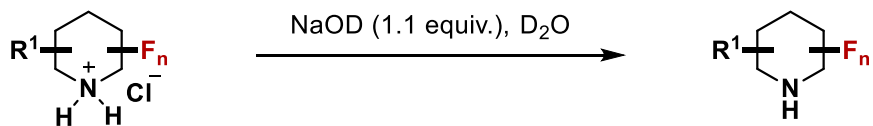

To a solution of fluoropiperidinium hydrochloride salt (**1B–12B**, 1.0 equiv.) in  $\text{D}_2\text{O}$  (1 mL) was added NaOD (1.1 equiv.) at room temperature. The mixture was then transferred to NMR tube and submitted for measurements.

## General procedure B

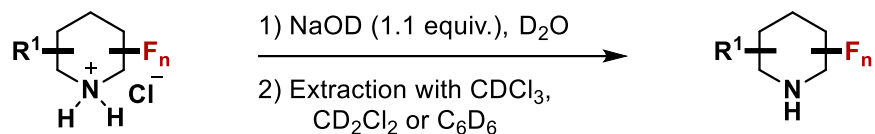

To a solution of fluoropiperidinium hydrochloride salt (**1B–12B**, 1.0 equiv.) in D<sub>2</sub>O (1 mL) was added NaOD (1.1 equiv.) at room temperature. The aqueous solution was then extracted with a deuterated solvent (CDCl<sub>3</sub>, CD<sub>2</sub>Cl<sub>2</sub> or C<sub>6</sub>D<sub>6</sub>), dried over MgSO<sub>4</sub> and transferred to NMR tube for the required measurements.

### Preparation of 1-(*cis*-3,5-difluoropiperidin-1-yl)ethan-1-one (**13**).

To a solution of *cis*-3,5-difluoropiperidine hydrochloride **2B** (0.157 g, 1.0 mmol, 1.0 equiv.) in H<sub>2</sub>O (1 mL) was added 1M NaOH (1.1 mL, 1.1 mmol, 1.1 equiv.) at room temperature. The aqueous solution was then extracted with CH<sub>2</sub>Cl<sub>2</sub> (3×5 mL), dried over MgSO<sub>4</sub> and filtrated to deliver the non-protonated fluoropiperidine derivative in CH<sub>2</sub>Cl<sub>2</sub> solution.

To the prepared solution, acetyl chloride (0.117 g, 1.5 mmol, 1.5 equiv.) and triethylamine (0.42 mL, 3.0 mmol, 3.0 equiv.) were added at room temperature. Upon the completion of the reaction (followed by TLC), water (10 mL) was added. The organic layer was separated and the aqueous layer was further extracted with CH<sub>2</sub>Cl<sub>2</sub> (3×5 mL). The organic layers were combined, dried over MgSO<sub>4</sub>, filtrated and concentrated under reduced pressure. The crude was then submitted to column chromatography (0-100% ethyl acetate in pentane) to obtain the final product as a white solid (0.15 g, 0.92 mmol, 92%).

### Preparation of 1-(*cis*-3,5-difluoropiperidin-1-yl)-2,2-dimethylpropan-1-one (**14**).

To a solution of *cis*-3,5-difluoropiperidine hydrochloride **2B** (0.504 g, 3.2 mmol, 1.0 equiv.) in H<sub>2</sub>O (2 mL) was added 1M NaOH (3.5 mL, 3.5 mmol, 1.1 equiv.) at room temperature. The aqueous solution was then extracted with CH<sub>2</sub>Cl<sub>2</sub> (3×5 mL), dried over MgSO<sub>4</sub> and filtrated to deliver the non-protonated fluoropiperidine derivative in CH<sub>2</sub>Cl<sub>2</sub> solution.

To the prepared solution, pivaloyl chloride (1.1 g, 9.6 mmol, 3.0 equiv.) and triethylamine (1.3 mL, 9.6 mmol, 3.0 equiv.) were added at room temperature. Upon the completion of the reaction (followed by TLC), water (10 mL) was added. The organic layer was separated and the

aqueous layer was further extracted with  $\text{CH}_2\text{Cl}_2$  ( $3 \times 5$  mL). The organic layers were combined, dried over  $\text{MgSO}_4$ , filtrated and concentrated under reduced pressure. The crude was then submitted to column chromatography (0-10% ethyl acetate in pentane) to obtain the final product as a white solid (0.612 g, 2.9 mmol, 90%).



## 2,2,2-Trifluoro-1-(3-fluoropiperidin-1-yl)ethan-1-one (1A)

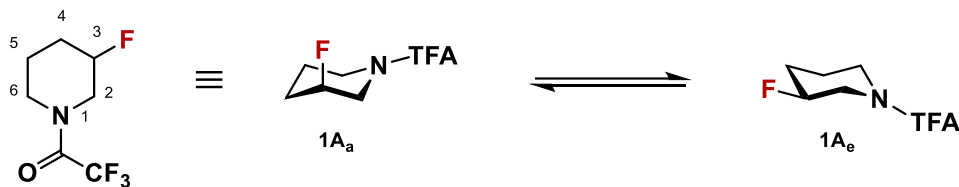

This compound was prepared following a recent literature procedure.<sup>1</sup>

### Experimental observation

The product was present as a ~1:1 mixture of amide bond rotamers.

In **Toluene-*d*<sub>8</sub>**: The orientation of the fluorine atom was assigned as axial due to the large value of  $^3J(\text{F}, \text{H}_a)$ .<sup>1</sup> [Rot A:  $^3J(2\text{-H}_a, 3\text{-F}) = 26.0$  Hz, Rot B:  $^3J(2\text{-H}_a, 3\text{-F}) = 26.0$  Hz]

### Computational observation

The calculated  $\Delta G$  is given for the energetically lowest conformers.

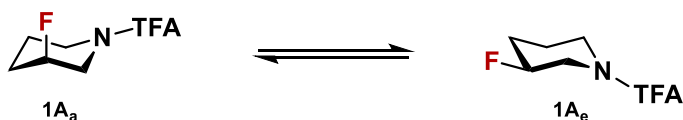

| Solvent          | $\Delta G(\text{a} \rightarrow \text{e})$ | $\Delta E_{\text{elect}}$ | $\Delta E_{\text{hyperc}}$ | $\Delta E_{\text{steric}}$ | $\mu_a$ | $\mu_e$ | Experimental |
|------------------|-------------------------------------------|---------------------------|----------------------------|----------------------------|---------|---------|--------------|
| <b>Toluene</b>   | +0.1                                      | +6.5                      | +3.3                       | -9.6                       | 6.8     | 4.3     | axial        |
| <b>gas phase</b> | -0.4                                      | +9.4                      | +2.4                       | -12.1                      | 5.6     | 3.6     | -            |

All values are given in kcal/mol at 298 K.

### 3-Fluoropiperidine hydrochloride (1B)

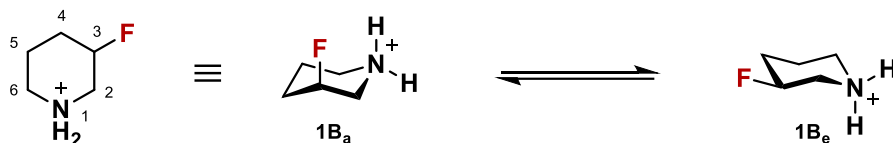

This compound was prepared following a recent literature procedure.<sup>1</sup>

#### Experimental observation

In **D<sub>2</sub>O**: The orientation of the fluorine atom was assigned as axial due to the large value of  $^3J(\text{F}, \text{H}_a)$ .<sup>1</sup> [ $^3J(\text{2-H}_a, \text{3-F}) = 38.7 \text{ Hz}$ ]

#### Computational observation

The calculated  $\Delta G$  is given for the energetically lowest conformers.

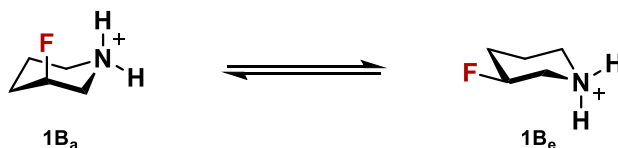

| Solvent               | $\Delta G(\text{a} \rightarrow \text{e})$ | $\Delta E_{\text{elect}}$ | $\Delta E_{\text{hyperc}}$ | $\Delta E_{\text{steric}}$ | $\mu_a$ | $\mu_e$ | Experimental |
|-----------------------|-------------------------------------------|---------------------------|----------------------------|----------------------------|---------|---------|--------------|
| <b>H<sub>2</sub>O</b> | +1.8                                      | +12.6                     | +3.8                       | -14.4                      | 6.9     | 9.0     | axial        |
| <b>gas phase</b>      | +4.8                                      | +22.1                     | -0.1                       | -16.8                      | 5.0     | 7.0     | -            |

All values are given in kcal/mol at 298 K.

### 3-Fluoropiperidine (1C)

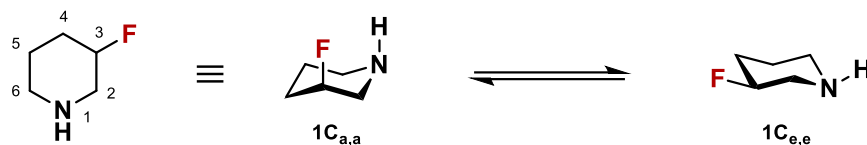

The preparation of this compound is described in the previous section.

#### Experimental observation

In **D<sub>2</sub>O**: Due to peaks overlapping in NMR spectra, we could not verify the orientation of the fluorine atom through  $^3J(\text{F},\text{H}_a)$ . Therefore we conducted additional NMR studies that includes  $^1\text{H}\{^{19}\text{F}\}$  NMR with homo-decoupling of proton at two different positions 4-H and 2-H (separately). From these experiments, we found that the vicinal coupling constants  $^3J(3\text{-H}_e,2\text{-H}_a)$ ,  $^3J(3\text{-H}_e,2\text{-H}_{\text{eq}})$ ,  $^3J(3\text{-H}_e,4\text{-H}_a)$  and  $^3J(3\text{-H}_e,4\text{-H}_e)$  are of small values ( $\sim 4.4$  Hz). In addition, we could not observe any axial-axial interaction between 3-H and 4-H/2-H. Accordingly, we believe that the axial orientation of the fluorine atom in this case is dominant.

**$^1\text{H}$  NMR** (500 MHz, D<sub>2</sub>O, 299 K)  $\delta$  4.79 (d,  $J = 47.3$  Hz, 1H overlaps with solvent), 3.04 – 2.91 (m, 2H), 2.89 – 2.81 (m, 1H), 2.78 – 2.69 (m, 1H), 1.97 – 1.75 (m, 3H), 1.61 – 1.52 (m, 1H);  **$^1\text{H}\{^{19}\text{F}\}$  NMR** (500 MHz, D<sub>2</sub>O, 299 K)  $\delta$  4.79 (s, 1H overlaps with solvent), 3.07 – 2.92 (m, 2H), 2.90 – 2.81 (m, 1H), 2.78 – 2.69 (m, 1H), 2.00 – 1.76 (m, 3H), 1.60 – 1.51 (m, 1H);  **$^{13}\text{C}$  NMR** (126 MHz, D<sub>2</sub>O, 299 K)  $\delta$  88.49 (d,  $J = 166.3$  Hz), 48.24 (d,  $J = 21.9$  Hz), 44.14, 28.58 (d,  $J = 19.8$  Hz), 20.89 (d,  $J = 3.9$  Hz);  **$^{13}\text{C}\{\text{sel-}^{19}\text{F at -183 ppm}\}$  NMR** (126 MHz, D<sub>2</sub>O, 299 K)  $\delta$  88.49, 48.24, 44.14, 28.58, 20.89;  **$^{19}\text{F}$  NMR** (470 MHz, D<sub>2</sub>O, 299 K)  $\delta$  -183.33;  **$^{19}\text{F}\{^1\text{H}\}$  NMR** (470 MHz, D<sub>2</sub>O, 299 K)  $\delta$  -183.33.

### Computational observation

The calculated  $\Delta G$  is presented as follows:  $\Delta G$  in water ( $\Delta G$  gas phase) and are given for the energetically lowest conformers.

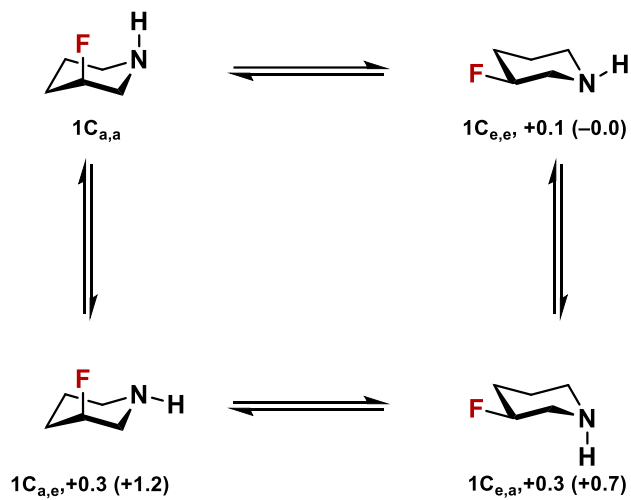

| Solvent               | $\Delta G(a,a \rightarrow e,e)$ | $\Delta E_{\text{elect}}$ | $\Delta E_{\text{hyperc}}$ | $\Delta E_{\text{steric}}$ | $\mu_{a,a}$ | $\mu_{e,e}$ | Experimental   |
|-----------------------|---------------------------------|---------------------------|----------------------------|----------------------------|-------------|-------------|----------------|
| <b>H<sub>2</sub>O</b> | +0.1                            | +12.7                     | +5.1                       | -17.7                      | 2.3         | 2.9         | axial dominant |
| <b>gas phase</b>      | -0.0                            | +6.9                      | +4.8                       | -11.7                      | 1.6         | 2.2         | -              |

All values are given in kcal/mol at 298 K.

## 1-(*cis*-3,5-Difluoropiperidin-1-yl)-2,2,2-trifluoroethan-1-one (2A)

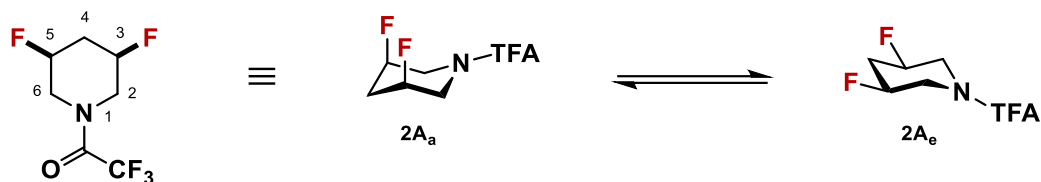

For this particular sample we conducted several computations and NMR experiments in different solvents in order to investigate the effect of solvent's dipole moment on the orientation of the fluorine atoms.

This compound was prepared following a recent literature procedure.<sup>1</sup>

### Experimental observation

In **CDCl<sub>3</sub>**: The orientation of the fluorine atoms was assigned as axial due to the large values of  $^3J(\text{F}, \text{H}_a)$ .<sup>1</sup> [ $^3J(2\text{-H}_a, 3\text{-F}) = 32.1 \text{ Hz}$ ,  $^3J(4\text{-H}_a, 3\text{-F}) = 36.1 \text{ Hz}$ ,  $^3J(4\text{-H}_a, 5\text{-F}) = 36.1 \text{ Hz}$ ,  $^3J(6\text{-H}_a, 5\text{-F}) = 30.6 \text{ Hz}$ ]

In **DMSO**: The orientation of the fluorine atoms was assigned as axial due to the large values of  $^3J(\text{F}, \text{H}_a)$ . [ $^3J(2\text{-H}_a, 3\text{-F}) = 38.6 \text{ Hz}$ ,  $^3J(4\text{-H}_a, 3\text{-F}) = 44.4 \text{ Hz}$ ,  $^3J(4\text{-H}_a, 5\text{-F}) = 44.4 \text{ Hz}$ ,  $^3J(6\text{-H}_a, 5\text{-F}) = 40.1 \text{ Hz}$ ]

**<sup>1</sup>H NMR** (500 MHz, DMSO-*d*<sub>6</sub>, 299 K)  $\delta$  4.95 (dm,  $J = 46.0 \text{ Hz}$ , 1H), 4.90 (dm,  $J = 46.0 \text{ Hz}$ , 1H), 4.56 (ddq,  $J = 14.8, 12.4, 2.5 \text{ Hz}$ , 1H), 4.09 (dddd,  $J = 13.0, 9.3, 4.9, 2.5 \text{ Hz}$ , 1H), 3.62 (ddd,  $J = 38.6, 15.1, 1.5 \text{ Hz}$ , 1H), 3.23 (dd,  $J = 40.1, 14.5 \text{ Hz}$ , 1H), 2.30 (dt,  $J = 17.3, 12.4, 2.5 \text{ Hz}$ , 1H), 2.10 (tdt,  $J = 44.4, 16.2, 3.3 \text{ Hz}$ , 1H); **<sup>1</sup>H{<sup>19</sup>F} NMR** (500 MHz, DMSO-*d*<sub>6</sub>, 299 K)  $\delta$  4.96 (bs, 1H), 4.91 (bs, 1H), 4.56 (dq,  $J = 14.6, 2.5 \text{ Hz}$ , 1H), 4.09 (dm,  $J = 15.1 \text{ Hz}$ , 1H), 3.62 (d,  $J = 15.0 \text{ Hz}$ , 1H), 3.23 (d,  $J = 14.5 \text{ Hz}$ , 1H), 2.30 (dp,  $J = 16.2, 2.5 \text{ Hz}$ , 1H), 2.10 (dt,  $J = 16.2, 3.3 \text{ Hz}$ , 1H).

In **CD<sub>2</sub>Cl<sub>2</sub>**: The orientation of the fluorine atoms was assigned as axial due to the large values of  $^3J(\text{F}, \text{H}_a)$ . [ $^3J(2\text{-H}_a, 3\text{-F}) = 32.9 \text{ Hz}$ ,  $^3J(4\text{-H}_a, 3\text{-F}) = 38.8 \text{ Hz}$ ,  $^3J(4\text{-H}_a, 5\text{-F}) = 38.8 \text{ Hz}$ ,  $^3J(6\text{-H}_a, 5\text{-F}) = 34.6 \text{ Hz}$ ]

**<sup>1</sup>H NMR** (500 MHz, CD<sub>2</sub>Cl<sub>2</sub>, 299 K)  $\delta$  4.86 (dm,  $J = 45.1 \text{ Hz}$ , 1H), 4.79 (dm,  $J = 45.7 \text{ Hz}$ , 1H), 4.66 – 4.58 (m, 1H), 4.21 – 4.12 (m, 1H), 3.46 (dd,  $J = 32.9, 14.9 \text{ Hz}$ , 1H), 3.18 (ddm,  $J = 34.6$ ,

14.5 Hz, 1H), 2.52 – 2.38 (m, 1H), 2.03 (tdm,  $J = 38.8, 15.8$  Hz, 1H);  $^1\text{H}\{^{19}\text{F}\}$  NMR (500 MHz,  $\text{CD}_2\text{Cl}_2$ , 299 K)  $\delta$  4.89 – 4.85 (m, 1H), 4.83 – 4.76 (m, 1H), 4.62 (dm,  $J = 14.5$  Hz, 1H), 4.16 (dm,  $J = 14.9$  Hz, 1H), 3.46 (d,  $J = 15.0$  Hz, 1H), 3.17 (dd,  $J = 14.5, 3.6$  Hz, 1H), 2.46 (dm,  $J = 15.8$  Hz, 1H), 2.02 (dm,  $J = 15.8$  Hz, 1H).

In  $\text{C}_6\text{D}_6$ : The orientation of the fluorine atoms was assigned as axial due to the large values of  $^3J(\text{F},\text{H}_a)$ . [ $^3J(2\text{-H}_a,3\text{-F}) = 29.6$  Hz,  $^3J(4\text{-H}_a,3\text{-F}) = 34.1$  Hz,  $^3J(4\text{-H}_a,5\text{-F}) = 34.1$  Hz,  $^3J(6\text{-H}_a,5\text{-F}) = 30.6$  Hz]

$^1\text{H}$  NMR (500 MHz,  $\text{C}_6\text{D}_6$ , 299 K)  $\delta$  4.03 – 3.95 (m, 1H), 3.82 (dm,  $J = 45.0$  Hz, 1H overlaps with 5- $\text{H}_e$ ), 3.74 (dm,  $J = 45.7$  Hz, 1H overlaps with 3- $\text{H}_e$ ), 3.45 – 3.35 (m, 1H), 2.46 (dm,  $J = 29.6$  Hz, 1H overlaps with 6- $\text{H}_a$ ), 2.40 (dm,  $J = 30.6$  Hz, 1H overlaps with 2- $\text{H}_a$ ), 1.75 – 1.63 (m, 1H), 0.90 (tdt,  $J = 34.1, 15.1, 3.7$  Hz, 1H);  $^1\text{H}\{^{19}\text{F}\}$  NMR (500 MHz,  $\text{C}_6\text{D}_6$ , 299 K)  $\delta$  3.99 (dm,  $J = 14.2$  Hz, 1H), 3.85 – 3.81 (m, 1H), 3.78 – 3.73 (m, 1H), 3.40 (dm  $J = 14.7$  Hz, 1H), 2.47 (dd,  $J = 14.7, 2.4$  Hz, 1H), 2.40 (dd,  $J = 14.2, 2.4$  Hz, 1H), 1.69 (dtt,  $J = 15.1, 4.5, 1.7$  Hz, 1H), 0.90 (dt,  $J = 15.1, 3.7$  Hz, 1H).

### Computational observation

The calculated  $\Delta G$  is given for the energetically lowest conformers.

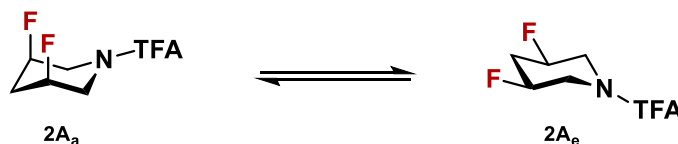

| Solvent                  | $\Delta G(a \rightarrow e)$ | $\Delta E_{\text{elect}}$ | $\Delta E_{\text{hyperc}}$ | $\Delta E_{\text{steric}}$ | $\mu_a$ | $\mu_e$ | Experimental |
|--------------------------|-----------------------------|---------------------------|----------------------------|----------------------------|---------|---------|--------------|
| DMSO                     | +2.0                        | +10.6                     | +12.1                      | -20.8                      | 9.8     | 3.3     | axial        |
| $\text{CH}_2\text{Cl}_2$ | +1.4                        | +8.5                      | +11.9                      | -19.0                      | 9.3     | 3.2     | axial        |
| $\text{CHCl}_3$          | +0.9                        | +8.1                      | +11.7                      | -18.8                      | 8.9     | 3.0     | axial        |
| $\text{C}_6\text{H}_6$   | +0.1                        | +12.4                     | +11.4                      | -23.7                      | 8.1     | 2.7     | axial        |
| gas phase                | -1.4                        | +12.5                     | +11.0                      | -24.8                      | 6.6     | 2.2     | -            |

All values are given in kcal/mol at 298 K.

## *cis*-3,5-Difluoropiperidine hydrochloride (2B)

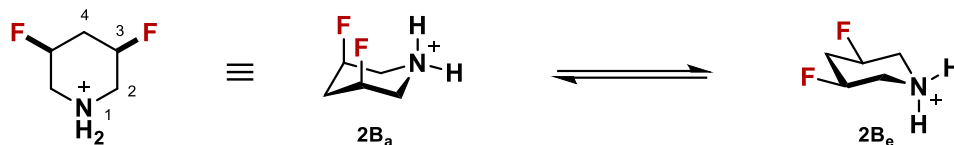

This compound was prepared following a recent literature procedure.<sup>1</sup>

### Experimental observation

In **D<sub>2</sub>O**: The orientation of the fluorine atoms was assigned as axial due to the large values of  $^3J(\text{F}, \text{H}_a)$ .<sup>1</sup> [ $^3J(2\text{-H}_a, 3\text{-F}) = 39.5 \text{ Hz}$ ,  $^3J(4\text{-H}_a, 3\text{-F}) = 46.7 \text{ Hz}$ ]

### Computational observation

The calculated  $\Delta G$  is given for the energetically lowest conformers.

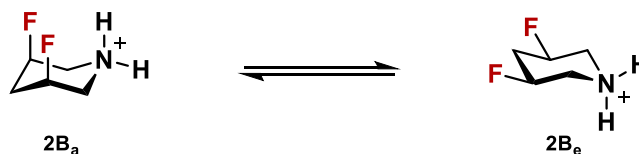

| Solvent               | $\Delta G(a \rightarrow e)$ | $\Delta E_{\text{elect}}$ | $\Delta E_{\text{hyperc}}$ | $\Delta E_{\text{steric}}$ | $\mu_a$ | $\mu_e$ | Experimental |
|-----------------------|-----------------------------|---------------------------|----------------------------|----------------------------|---------|---------|--------------|
| <b>H<sub>2</sub>O</b> | +3.9                        | +14.7                     | +11.0                      | -21.1                      | 9.1     | 10.1    | axial        |
| <b>gas phase</b>      | +8.6                        | +33.9                     | +5.4                       | -30.3                      | 6.8     | 7.8     | -            |

All values are given in kcal/mol at 298 K.

### *cis*-3,5-Difluoropiperidine (2C)

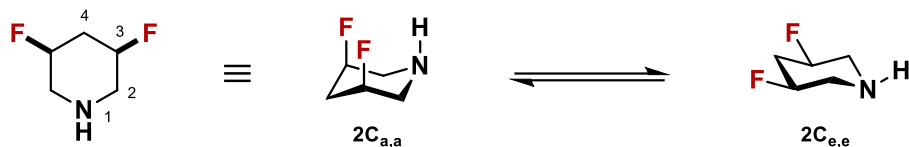

For this particular sample we conducted NMR experiments in different solvents in order to investigate the effect of solvent's dipole moment on the orientation of the fluorine atoms.

The preparation of this compound is described in the previous section.

#### Experimental observation

In **D<sub>2</sub>O**: The orientation of the fluorine atoms was assigned as axial due to the large values of  $^3J(\text{F},\text{H}_a)$ . [ $^3J(2\text{-H}_a,3\text{-F}) = 40.2 \text{ Hz}$ ,  $^3J(4\text{-H}_a,3\text{-F}) = 44.2 \text{ Hz}$ ]

**<sup>1</sup>H NMR** (500 MHz, D<sub>2</sub>O, 299 K)  $\delta$  4.81 (dm,  $J = 46.6 \text{ Hz}$ , 2H overlap with solvent), 3.23 – 3.13 (m, 2H), 2.85 (dd,  $J = 40.2, 14.6 \text{ Hz}$ , 2H), 2.47 – 2.35 (m, 1H), 2.10 (tdt,  $J = 44.2, 16.1, 3.3 \text{ Hz}$ , 1H); **<sup>1</sup>H{<sup>19</sup>F} NMR** (500 MHz, D<sub>2</sub>O, 299 K)  $\delta$  4.85 – 4.81 (m, 2H), 3.18 (dm,  $J = 14.9 \text{ Hz}$ , 2H), 2.86 (d,  $J = 14.8 \text{ Hz}$ , 2H), 2.40 (dm,  $J = 16.1 \text{ Hz}$ , 1H), 2.10 (dt,  $J = 16.8, 3.3 \text{ Hz}$ , 1H); **<sup>13</sup>C NMR** (126 MHz, D<sub>2</sub>O, 299 K)  $\delta$  86.68 (d,  $J = 168.3 \text{ Hz}$ ), 47.35 – 47.03 (m), 32.20 (t,  $J = 20.1 \text{ Hz}$ ); **<sup>13</sup>C{sel-<sup>19</sup>F at -181 ppm} NMR** (126 MHz, D<sub>2</sub>O, 299 K)  $\delta$  86.68, 47.19, 32.20; **<sup>19</sup>F NMR** (470 MHz, D<sub>2</sub>O, 299 K)  $\delta$  -181.73 – -182.13 (m); **<sup>19</sup>F{<sup>1</sup>H} NMR** (470 MHz, D<sub>2</sub>O, 299 K)  $\delta$  -181.94.

In **DMSO**: The orientation of the fluorine atoms was assigned as axial due to the large value of  $^3J(\text{F},\text{H}_a)$ . [ $^3J(2\text{-H}_a,3\text{-F}) = 31.9 \text{ Hz}$ ]

It should be noted that the NMR sample contained small amount of water that were needed for the preparation of the non-protonated piperidine.

**<sup>1</sup>H NMR** (600 MHz, DMSO-*d*<sub>6</sub>, 299 K)  $\delta$  4.57 (dm,  $J = 47.1 \text{ Hz}$ , 2H), 2.81 (ddt,  $J = 13.6, 11.8, 2.6 \text{ Hz}$ , 2H), 2.72 (dd,  $J = 31.9, 14.2 \text{ Hz}$ , 2H), 2.14 – 1.93 (m, 2H); **<sup>1</sup>H{<sup>19</sup>F} NMR** (600 MHz, DMSO-*d*<sub>6</sub>, 299 K)  $\delta$  4.60 – 4.52 (m, 2H), 2.82 (dd,  $J = 14.3, 4.2 \text{ Hz}$ , 2H), 2.72 (d,  $J = 14.4 \text{ Hz}$ , 2H), 2.07 – 2.00 (m, 2H).



In **CDCl<sub>3</sub>**: The orientation of the fluorine atoms was assigned as axial due to the large values of  $^3J_{(F,H_a)}$ . [ $^3J_{(2-H_a,3-F)} = 30.1$  Hz,  $^3J_{(4-H_a,3-F)} = 34.5$  Hz]

$^1H$  NMR (600 MHz, CD<sub>2</sub>Cl<sub>2</sub>, 299 K)  $\delta$  4.57 (dm,  $J = 46.0$  Hz, 2H), 3.14 – 3.05 (m, 2H), 2.91 (ddd,  $J = 30.1, 14.3, 2.2$  Hz, 2H), 2.35 – 2.23 (m, 1H), 2.06 (tdt,  $J = 34.5, 14.9, 3.6$  Hz, 1H);  $^1H\{^{19}F\}$  NMR (600 MHz, CD<sub>2</sub>Cl<sub>2</sub>, 299 K)  $\delta$  4.62 – 4.55 (m, 2H), 3.09 (ddd,  $J = 14.3, 4.4, 1.9$  Hz, 2H), 2.91 (d,  $J = 14.3$  Hz, 2H), 2.29 (dm,  $J = 14.8$  Hz, 1H), 2.06 (dt,  $J = 14.9, 3.6$  Hz, 1H).

In **CD<sub>2</sub>Cl<sub>2</sub>**: The orientation of the fluorine atoms was assigned as axial due to the large values of  $^3J_{(F,H_a)}$ . [ $^3J_{(2-H_a,3-F)} = 28.5$  Hz,  $^3J_{(4-H_a,3-F)} = 33.5$  Hz]

$^1H$  NMR (600 MHz, CD<sub>2</sub>Cl<sub>2</sub>, 299 K)  $\delta$  4.53 (dm,  $J = 47.2$  Hz, 2H), 3.03 – 2.96 (m, 2H), 2.89 (dm,  $J = 28.5$  Hz, 2H), 2.25 – 2.15 (m, 1H), 2.07 (tdt,  $J = 33.5, 14.6, 3.6$  Hz, 1H);  $^1H\{^{19}F\}$  NMR (600 MHz, CD<sub>2</sub>Cl<sub>2</sub>, 299 K)  $\delta$  4.56 – 4.50 (m, 2H), 3.00 (ddd,  $J = 14.1, 4.8, 1.8$  Hz, 2H), 2.90 (dd,  $J = 14.2, 2.5$  Hz, 2H), 2.19 (dtt,  $J = 14.7, 5.1, 1.9$  Hz, 1H), 2.08 (dt,  $J = 14.6, 3.6$  Hz, 1H).

In **C<sub>6</sub>D<sub>6</sub>**: The dominant orientation of the fluorine atoms is assigned to be axial based on the values of  $^3J_{(F,H_a)}$ . [ $^3J_{(2-H_a,3-F)} = 21.2$  Hz,  $^3J_{(4-H_a,3-F)} = 25.5$  Hz]

$^1H$  NMR (600 MHz, C<sub>6</sub>D<sub>6</sub>, 299 K)  $\delta$  3.92 (dm,  $J = 47.6$  Hz, 2H), 2.54 – 2.48 (m, 2H), 2.43 (dd,  $J = 21.2, 13.3$  Hz, 2H), 1.83 – 1.72 (m, 1H), 1.59 (tdt,  $J = 25.5, 14.0, 3.9$  Hz, 1H);  $^1H\{^{19}F\}$  NMR (600 MHz, C<sub>6</sub>D<sub>6</sub>, 299 K)  $\delta$  3.94 – 3.90 (m, 2H), 2.51 (ddd,  $J = 13.4, 6.1, 1.3$  Hz, 2H), 2.42 (dd,  $J = 13.3, 3.3$  Hz, 2H), 1.81 – 1.74 (m, 1H), 1.59 (dt,  $J = 13.6, 4.0$  Hz, 1H).

### Computational observation

The calculated  $\Delta G$  values in different solvents for the energetically lowest conformers are presented. In the scheme, the values of  $\Delta G$  in water ( $\Delta G$  gas phase) are given.

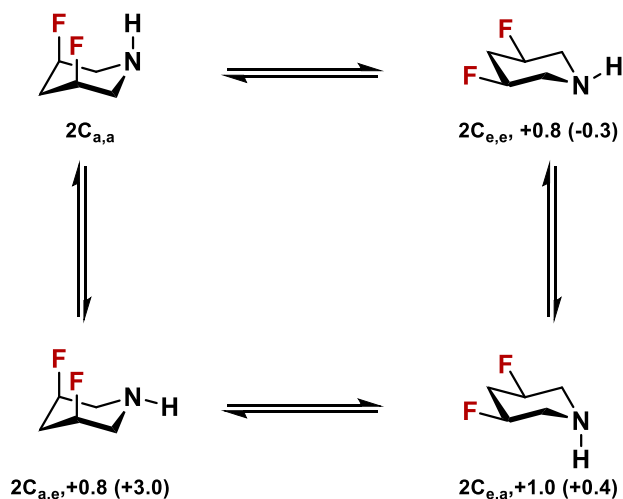

| Solvent                         | $\Delta G(a,a \rightarrow e,e)$ | $\Delta E_{\text{elect}}$ | $\Delta E_{\text{hyperc}}$ | $\Delta E_{\text{steric}}$ | $\mu_{a,a}$ | $\mu_{e,e}$ | Experimental |
|---------------------------------|---------------------------------|---------------------------|----------------------------|----------------------------|-------------|-------------|--------------|
| DMSO                            | +0.8                            | +20.8                     | +10.8                      | -30.7                      | 4.4         | 2.8         | axial        |
| H <sub>2</sub> O                | +0.8                            | +20.8                     | +10.8                      | -30.7                      | 4.4         | 2.8         | axial        |
| CH <sub>2</sub> Cl <sub>2</sub> | +0.6                            | +20.8                     | +10.9                      | -30.9                      | 4.3         | 2.8         | axial        |
| CHCl <sub>3</sub>               | +0.5                            | +20.5                     | +11.0                      | -30.9                      | 4.1         | 2.7         | axial        |
| C <sub>6</sub> H <sub>6</sub>   | +0.2                            | +20.2                     | +11.1                      | -31.0                      | 3.7         | 2.6         | axial        |
| gas phase                       | -0.3                            | +20.6                     | +11.3                      | -32.1                      | 3.1         | 2.3         | -            |

All values are given in kcal/mol at 298 K.

## 2,2,2-Trifluoro-1-(*cis*-3-fluoro-4-methylpiperidin-1-yl)ethan-1-one (3A)

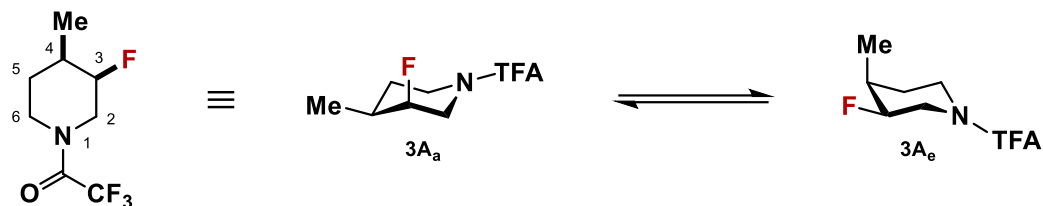

This compound was prepared following a recent literature procedure.<sup>1</sup>

### Experimental observation

The product was present as a ~1:1 mixture of amide bond rotamers.

In  $\text{CDCl}_3$ : The orientation of the fluorine atom was assigned as axial due to the large value of  $^3J(\text{F}, \text{H}_a)$ .<sup>1</sup> [Rot A:  $^3J(2\text{-H}_a, 3\text{-F}) = 38.3$  Hz, Rot B:  $^3J(2\text{-H}_a, 3\text{-F}) = 36.6$  Hz]

### Computational observation

The calculated  $\Delta G$  is given for the energetically lowest conformers.

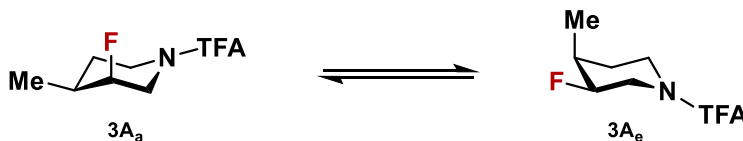

| Solvent         | $\Delta G(a \rightarrow e)$ | $\Delta E_{\text{elect}}$ | $\Delta E_{\text{hyperc}}$ | $\Delta E_{\text{steric}}$ | $\mu_a$ | $\mu_e$ | Experimental |
|-----------------|-----------------------------|---------------------------|----------------------------|----------------------------|---------|---------|--------------|
| $\text{CHCl}_3$ | +2.3                        | -0.8                      | +5.0                       | -2.1                       | 7.5     | 5.8     | axial        |
| gas phase       | +1.8                        | +0.5                      | +4.4                       | -3.3                       | 5.6     | 4.4     | -            |

All values are given in kcal/mol at 298 K.

### *cis*-3-Fluoro-4-methylpiperidine hydrochloride (3B)

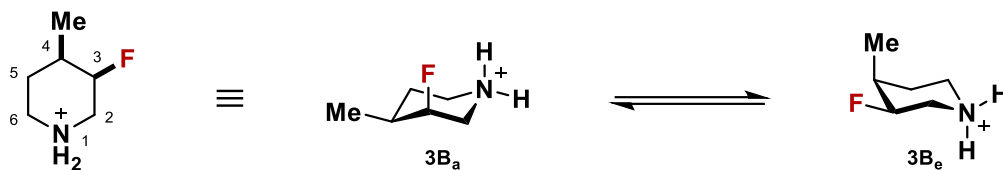

This compound was prepared following a recent literature procedure.<sup>1</sup>

#### Experimental observation

In **D<sub>2</sub>O**: The orientation of the fluorine atoms was assigned as axial due to the large values of  $^3J(\text{F}, \text{H}_a)$ .<sup>1</sup> [ $^3J(2\text{-H}_a, 3\text{-F}) = 36.6 \text{ Hz}$ ,  $^3J(4\text{-H}_a, 3\text{-F}) = 36.5 \text{ Hz}$ ]

#### Computational observation

The calculated  $\Delta G$  is given for the energetically lowest conformers.

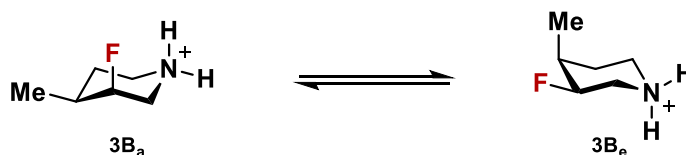

| Solvent               | $\Delta G(a \rightarrow e)$ | $\Delta E_{\text{elect}}$ | $\Delta E_{\text{hyperc}}$ | $\Delta E_{\text{steric}}$ | $\mu_a$ | $\mu_e$ | Experimental |
|-----------------------|-----------------------------|---------------------------|----------------------------|----------------------------|---------|---------|--------------|
| <b>H<sub>2</sub>O</b> | +3.6                        | +8.5                      | +3.0                       | -8.0                       | 8.3     | 9.7     | axial        |
| <b>gas phase</b>      | +6.2                        | +16.3                     | -0.8                       | -9.3                       | 6.0     | 7.4     | -            |

All values are given in kcal/mol at 298 K.

### *cis*-3-Fluoro-4-methylpiperidine (3C)

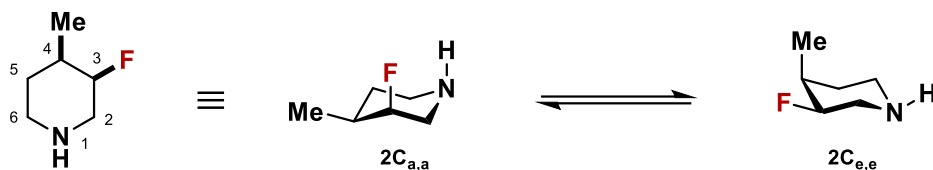

The preparation of this compound is described in the previous section.

#### Experimental observation

In **D<sub>2</sub>O**: The orientation of the fluorine atom was assigned as axial due to the large values of  $^3J(\text{F}, \text{H}_a)$ . [ $^3J(2\text{-H}_a, 3\text{-F}) = 42.3 \text{ Hz}$ ,  $^3J(4\text{-H}_a, 3\text{-F}) = 37.3 \text{ Hz}$ ]

**<sup>1</sup>H NMR** (600 MHz, D<sub>2</sub>O, 299 K) δ 4.56 (d,  $J = 48.3 \text{ Hz}$ , 1H), 3.12 (t,  $J = 13.0 \text{ Hz}$ , 1H), 2.91 (dm,  $J = 12.9 \text{ Hz}$ , 1H), 2.65 (dd,  $J = 42.3, 14.3 \text{ Hz}$ , 1H), 2.50 (tdd,  $J = 12.5, 3.3, 1.4 \text{ Hz}$ , 1H), 1.70 (dm,  $J = 37.3 \text{ Hz}$ , 1H), 1.50 – 1.34 (m, 2H), 0.96 (d,  $J = 6.9 \text{ Hz}$ , 3H); **<sup>1</sup>H{<sup>19</sup>F} NMR** (600 MHz, D<sub>2</sub>O, 299 K) δ 4.56 (bs, 1H), 3.12 (d,  $J = 13.8 \text{ Hz}$ , 1H), 2.91 (d,  $J = 12.9 \text{ Hz}$ , 1H), 2.65 (bs, 1H), 2.50 (td,  $J = 12.6, 3.2 \text{ Hz}$ , 1H), 1.70 (bs, 1H), 1.49 – 1.33 (m, 2H), 0.96 (d,  $J = 6.9 \text{ Hz}$ , 3H); **<sup>13</sup>C NMR** (151 MHz, D<sub>2</sub>O, 299 K) δ 92.05 (d,  $J = 169.6 \text{ Hz}$ ), 48.81 – 47.93 (m), 44.21, 33.08 (d,  $J = 20.2 \text{ Hz}$ ), 28.13, 16.93; **<sup>13</sup>C{sel-<sup>19</sup>F at -202 ppm} NMR** (151 MHz, D<sub>2</sub>O, 299 K) δ 92.02, 48.37, 44.20, 33.08, 28.12, 16.98; **<sup>19</sup>F NMR** (564 MHz, D<sub>2</sub>O, 299 K) δ -202.43; **<sup>19</sup>F{<sup>1</sup>H} NMR** (564 MHz, D<sub>2</sub>O, 299 K) δ -202.43.

### Computational observation

The calculated  $\Delta G$  values in different solvents for the energetically lowest conformers are presented. In the scheme, the values of  $\Delta G$  in water ( $\Delta G$  gas phase) are given.

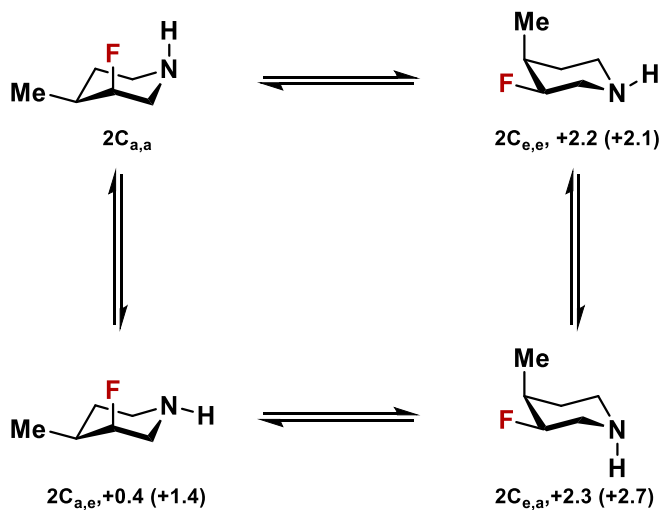

| Solvent          | $\Delta G(a,a \rightarrow e,e)$ | $\Delta E_{\text{elect}}$ | $\Delta E_{\text{hyperc}}$ | $\Delta E_{\text{steric}}$ | $\mu_{a,a}$ | $\mu_{e,e}$ | Experimental |
|------------------|---------------------------------|---------------------------|----------------------------|----------------------------|-------------|-------------|--------------|
| H <sub>2</sub> O | +2.2                            | +13.5                     | +5.8                       | -17.4                      | 2.3         | 2.8         | axial        |
| gas phase        | +2.1                            | +12.4                     | +5.6                       | -16.1                      | 1.6         | 2.1         | -            |

All values are given in kcal/mol at 298 K.

## 2,2,2-Trifluoro-1-(*cis*-3-fluoro-5-methylpiperidin-1-yl)ethan-1-one (4A)

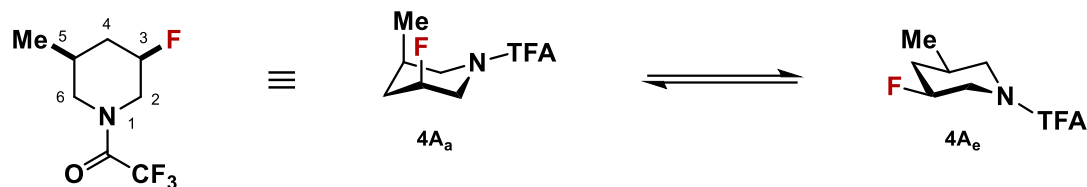

This compound was prepared following a recent literature procedure.<sup>1</sup>

### Experimental observation

The product was present as a ~1:1 mixture of amide bond rotamers.

In  $\text{CDCl}_3$ : The orientation of the fluorine atom was assigned as equatorial due to the small values of  $^3J(\text{F}, \text{H}_a)$ .<sup>1</sup> [Rot A:  $^3J(2\text{-H}_a, 3\text{-F}) = 4.4 \text{ Hz}$ ,  $^3J(4\text{-H}_a, 3\text{-F}) = 12.0 \text{ Hz}$ , Rot B:  $^3J(2\text{-H}_a, 3\text{-F}) = 5.1 \text{ Hz}$ ,  $^3J(4\text{-H}_a, 3\text{-F}) = 12.0 \text{ Hz}$ ]

### Computational observation

The calculated  $\Delta G$  is given for the energetically lowest conformers.

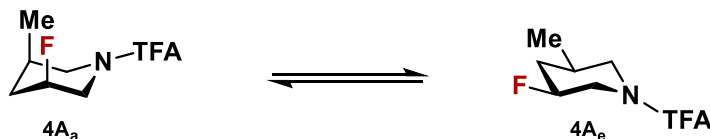

| Solvent         | $\Delta G(a \rightarrow e)$ | $\Delta E_{\text{elect}}$ | $\Delta E_{\text{hyperc}}$ | $\Delta E_{\text{steric}}$ | $\mu_a$ | $\mu_e$ | Experimental |
|-----------------|-----------------------------|---------------------------|----------------------------|----------------------------|---------|---------|--------------|
| $\text{CHCl}_3$ | -1.2                        | -3.6                      | +6.7                       | -3.8                       | 7.5     | 5.6     | equatorial   |
| gas phase       | -1.7                        | -3.2                      | +5.9                       | -3.9                       | 5.5     | 4.3     | -            |

All values are given in kcal/mol at 298 K.

### *cis*-3-Fluoro-5-methylpiperidine hydrochloride (4B)

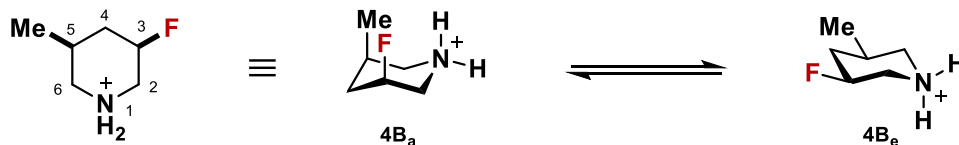

This compound was prepared following a recent literature procedure.<sup>1</sup>

#### Experimental observation

In **D<sub>2</sub>O**: Due to peaks overlapping and broadening in NMR spectra, we could not verify the orientation of the fluorine atom through  $^3J(\text{F},\text{H}_a)$  values. Therefore additional NMR studies that includes NOE and HF/FH-HetNOE experiments were conducted.<sup>1</sup> All those experiments showed unequivocally that the fluorine atom adopts equatorial orientation.<sup>1</sup>

#### Computational observation

The calculated  $\Delta G$  is given for the energetically lowest conformers.

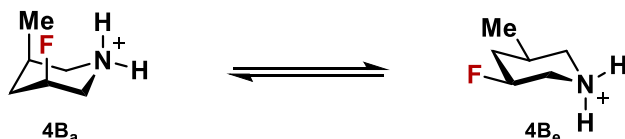

| Solvent               | $\Delta G(a \rightarrow e)$ | $\Delta E_{\text{elect}}$ | $\Delta E_{\text{hyperc}}$ | $\Delta E_{\text{steric}}$ | $\mu_a$ | $\mu_e$ | Experimental |
|-----------------------|-----------------------------|---------------------------|----------------------------|----------------------------|---------|---------|--------------|
| <b>H<sub>2</sub>O</b> | -0.4                        | +10.3                     | +6.6                       | -16.7                      | 7.4     | 8.9     | equatorial   |
| <b>gas phase</b>      | +2.9                        | +23.4                     | +2.4                       | -22.5                      | 5.3     | 6.8     | -            |

All values are given in kcal/mol at 298 K.



### *cis*-3-Fluoro-5-methylpiperidine (**4C**)

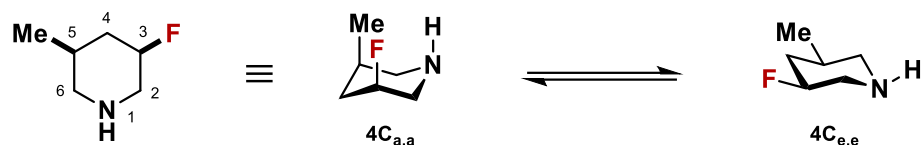

The preparation of this compound is described in the previous section.

#### Experimental observation

In  $D_2O$ : The orientation of the fluorine atom was assigned as equatorial due to the small values of  $^3J(F, H_a)$ . [ $^3J(2-H_a, 3-F) = 5.7$  Hz,  $^3J(4-H_a, 3-F) = 10.6$  Hz]

$^1H$  NMR (600 MHz,  $D_2O$ , 299 K)  $\delta$  4.64 (dtt,  $J = 48.6, 10.0, 4.7$  Hz, 1H), 3.24 – 3.19 (m, 1H), 2.85 (dt,  $J = 12.5, 4.1$  Hz, 1H), 2.46 (ddd,  $J = 11.8, 10.0, 5.7$  Hz, 1H), 2.25 – 2.17 (m, 1H), 2.08 (dd,  $J = 12.6, 10.8$  Hz, 1H), 1.73 – 1.63 (m, 1H), 1.31 – 1.20 (m, 1H), 0.95 (dd,  $J = 6.7, 1.1$  Hz, 3H);  $^1H\{^{19}F\}$  NMR (600 MHz,  $D_2O$ , 299 K)  $\delta$  4.72 – 4.55 (m, 1H), 3.21 (dd,  $J = 11.6, 3.9$  Hz, 1H), 2.85 (dd,  $J = 12.7, 4.1$  Hz, 1H), 2.46 (dd,  $J = 12.0, 9.8$  Hz, 1H), 2.24 – 2.19 (m, 1H), 2.08 (dd,  $J = 12.6, 10.8$  Hz, 1H), 1.72 – 1.63 (m, 1H), 1.29 – 1.21 (m, 1H), 0.95 (d,  $J = 6.7$  Hz, 3H);  $^{13}C$  NMR (151 MHz,  $D_2O$ , 299 K)  $\delta$  89.89 (d,  $J = 168.7$  Hz), 51.18 (d,  $J = 1.8$  Hz), 48.50 (d,  $J = 24.2$  Hz), 38.73 (d,  $J = 16.1$  Hz), 30.29 (d,  $J = 9.3$  Hz), 18.09 (d,  $J = 1.1$  Hz);  $^{13}C\{\text{sel-}^{19}F \text{ at } -175 \text{ ppm}\}$  NMR (151 MHz,  $D_2O$ , 299 K)  $\delta$  89.85, 51.16, 48.49, 38.72, 30.28, 18.07;  $^{19}F$  NMR (564 MHz,  $D_2O$ , 299 K)  $\delta$  -175.97 (dd,  $J = 48.4, 4.7$  Hz);  $^{19}F\{^1H\}$  NMR (564 MHz,  $D_2O$ , 299 K)  $\delta$  -175.97.

### Computational observation

The calculated  $\Delta G$  values in different solvents for the energetically lowest conformers are presented. In the scheme, the values of  $\Delta G$  in water ( $\Delta G$  gas phase) are given.

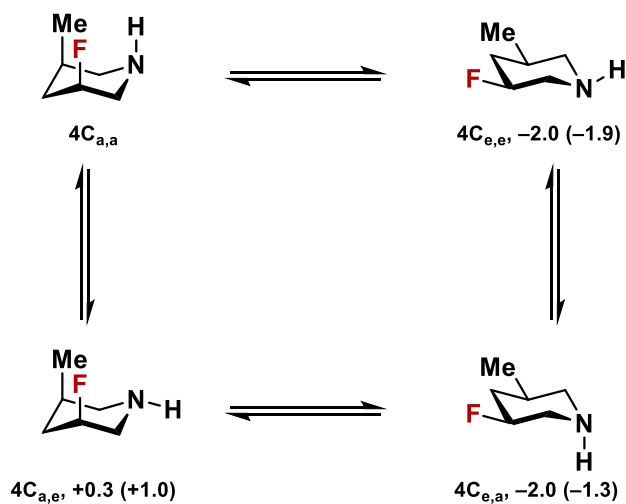

| Solvent          | $\Delta G(a,a \rightarrow e,e)$ | $\Delta E_{\text{elect}}$ | $\Delta E_{\text{hyperc}}$ | $\Delta E_{\text{steric}}$ | $\mu_{a,a}$ | $\mu_{e,e}$ | Experimental |
|------------------|---------------------------------|---------------------------|----------------------------|----------------------------|-------------|-------------|--------------|
| H <sub>2</sub> O | -2.0                            | +13.0                     | +7.2                       | -21.7                      | 2.4         | 2.8         | equatorial   |
| gas phase        | -1.9                            | +6.6                      | +7.1                       | -15.1                      | 1.6         | 2.2         | -            |

All values are given in kcal/mol at 298 K.

## 2,2,2-Trifluoro-1-(*cis*-3-fluoro-2-methylpiperidin-1-yl)ethan-1-one (5A)

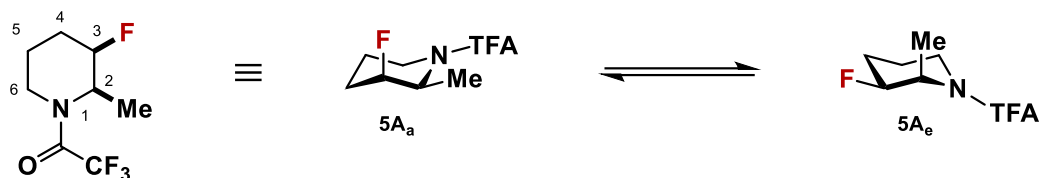

This compound was prepared following a recent literature procedure.<sup>1</sup>

### Experimental observation

The product was present as a ~1.5:1 mixture of amide bond rotamers.

In  $\text{CDCl}_3$ : Due to peaks overlapping and broadening in NMR spectra, we could not verify the orientation of the fluorine atom through  $^3J(\text{F},\text{H}_a)$  values. Therefore additional NMR studies that includes NOE and HF/FH-HetNOE experiments were conducted.<sup>1</sup> All those experiments showed unequivocally that the fluorine atom adopts equatorial orientation.<sup>1</sup>

### Computational observation

The calculated  $\Delta G$  is given for the energetically lowest conformers.

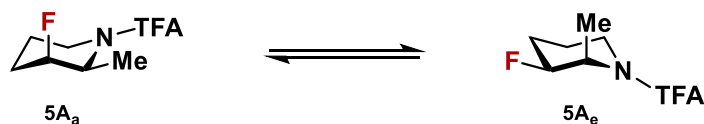

| Solvent         | $\Delta G(\text{a} \rightarrow \text{e})$ | $\Delta E_{\text{elect}}$ | $\Delta E_{\text{hyperc}}$ | $\Delta E_{\text{steric}}$ | $\mu_{\text{a}}$ | $\mu_{\text{e}}$ | Experimental |
|-----------------|-------------------------------------------|---------------------------|----------------------------|----------------------------|------------------|------------------|--------------|
| $\text{CHCl}_3$ | -3.7                                      | -5.1                      | +3.8                       | -2.1                       | 7.7              | 5.6              | equatorial   |
| gas phase       | -4.3                                      | -6.4                      | +5.1                       | -2.6                       | 5.6              | 4.1              | -            |

All values are given in kcal/mol at 298 K.

## *cis*-3-Fluoro-2-methylpiperidine hydrochloride (5B)

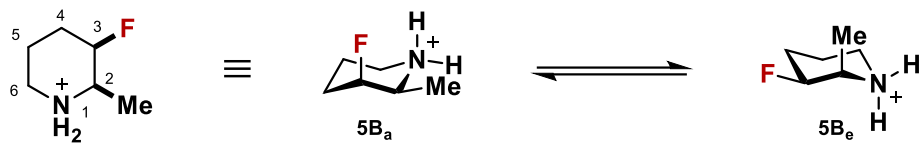

This compound was prepared following a recent literature procedure.<sup>1</sup>

### Experimental observation

In **D<sub>2</sub>O**: The orientation of the fluorine atoms was assigned as axial due to the large values of  $^3J(\text{F}, \text{H}_a)$ .<sup>1</sup> [ $^3J(2\text{-H}_a, 3\text{-F}) = 31.5 \text{ Hz}$ ,  $^3J(4\text{-H}_a, 3\text{-F}) = 46.0 \text{ Hz}$ ]

### Computational observation

The calculated  $\Delta G$  is given for the energetically lowest conformers.

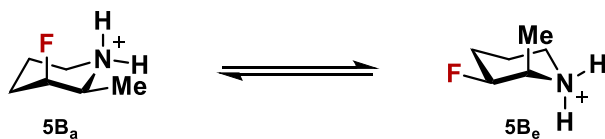

| Solvent               | $\Delta G(a \rightarrow e)$ | $\Delta E_{\text{elect}}$ | $\Delta E_{\text{hyperc}}$ | $\Delta E_{\text{steric}}$ | $\mu_a$ | $\mu_e$ | Experimental |
|-----------------------|-----------------------------|---------------------------|----------------------------|----------------------------|---------|---------|--------------|
| <b>H<sub>2</sub>O</b> | +3.3                        | +10.2                     | +3.6                       | -10.5                      | 6.3     | 8.7     | axial        |
| <b>gas phase</b>      | +6.2                        | +15.1                     | -0.0                       | -8.8                       | 4.5     | 6.6     | -            |

All values are given in kcal/mol at 298 K.

### *cis*-3-Fluoro-2-methylpiperidine (**5C**)

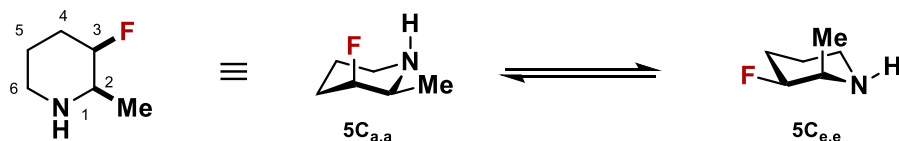

The preparation of this compound is described in the previous section.

#### Experimental observation

In **D<sub>2</sub>O**: The orientation of the fluorine atom was assigned as axial due to the large value of  $^3J(\text{F},\text{H}_a)$ . [ $^3J(\text{2-H}_a,\text{3-F}) = 32.3 \text{ Hz}$ ]

NMR spectra contain traces of the corresponding piperidine carboxylic acid due to a fast reaction of the free amine with carbon dioxide.

**<sup>1</sup>H NMR** (600 MHz, D<sub>2</sub>O, 299 K) δ 4.61 (d,  $J = 49.8 \text{ Hz}$ , 1H), 2.98 – 2.91 (m, 1H), 2.76 (dq,  $J = 32.3, 6.8, 1.4 \text{ Hz}$ , 1H), 2.63 – 2.56 (m, 1H), 2.12 – 2.04 (m, 1H), 1.76 – 1.60 (m, 2H), 1.50 – 1.44 (m, 1H), 1.10 (d,  $J = 6.8 \text{ Hz}$ , 3H); **<sup>1</sup>H{<sup>19</sup>F} NMR** (600 MHz, D<sub>2</sub>O, 299 K) δ 4.61 (bs, 1H), 2.97 – 2.91 (m, 1H), 2.76 (q,  $J = 6.8 \text{ Hz}$ , 1H), 2.59 (td,  $J = 12.5, 3.1 \text{ Hz}$ , 1H), 2.12 – 2.05 (m, 1H), 1.76 – 1.60 (m, 2H), 1.49 – 1.44 (m, 1H), 1.10 (d,  $J = 6.8 \text{ Hz}$ , 3H); **<sup>13</sup>C NMR** (151 MHz, D<sub>2</sub>O, 299 K) δ 91.28 (d,  $J = 166.0 \text{ Hz}$ ), 52.63 (d,  $J = 19.2 \text{ Hz}$ ), 44.49, 28.68 (d,  $J = 21.1 \text{ Hz}$ ), 19.29, 16.77 (d,  $J = 4.9 \text{ Hz}$ ); **<sup>13</sup>C{sel-<sup>19</sup>F at -201 ppm} NMR** (151 MHz, D<sub>2</sub>O, 299 K) δ 91.27, 52.62, 44.48, 28.67, 19.27, 16.74; **<sup>19</sup>F NMR** (564 MHz, D<sub>2</sub>O, 299 K) δ -201.54; **<sup>19</sup>F{<sup>1</sup>H} NMR** (564 MHz, D<sub>2</sub>O, 299 K) δ -201.54.

### Computational observation

The calculated  $\Delta G$  values in different solvents for the energetically lowest conformers are presented. In the scheme, the values of  $\Delta G$  in water ( $\Delta G$  gas phase) are given.

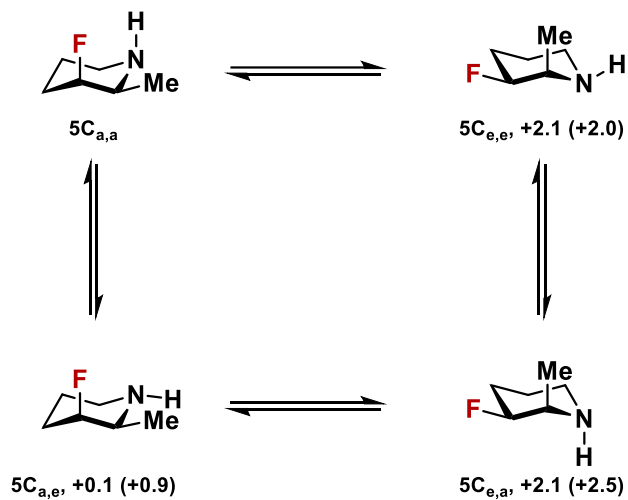

| Solvent          | $\Delta G(a,a \rightarrow e,e)$ | $\Delta E_{\text{elect}}$ | $\Delta E_{\text{hyperc}}$ | $\Delta E_{\text{steric}}$ | $\mu_{a,a}$ | $\mu_{e,e}$ | Experimental |
|------------------|---------------------------------|---------------------------|----------------------------|----------------------------|-------------|-------------|--------------|
| H <sub>2</sub> O | +2.1                            | +18.4                     | +3.1                       | -19.6                      | 2.4         | 2.8         | axial        |
| gas phase        | +2.0                            | +11.8                     | +2.8                       | -12.8                      | 1.6         | 2.0         | -            |

All values are given in kcal/mol at 298 K.

## 2,2,2-Trifluoro-1-(*cis*-5-fluoro-2-methylpiperidin-1-yl)ethan-1-one (6A)

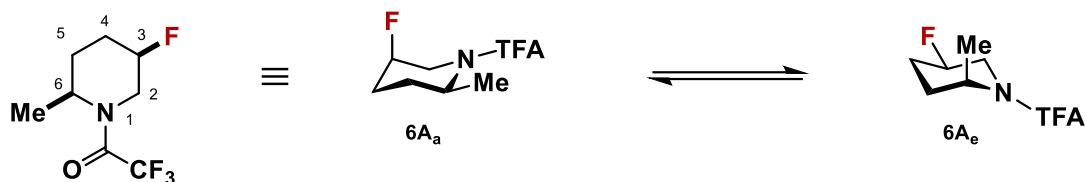

This compound was prepared following a recent literature procedure.<sup>1</sup>

### Experimental observation

The product was present as a ~1:1 mixture of amide bond rotamers.

In  $\text{CDCl}_3$ : The orientation of the fluorine atom was assigned as equatorial due to the small values of  $^3J(\text{F}, \text{H}_a)$ .<sup>1</sup> [Rot A:  $^3J(2\text{-H}_a, 3\text{-F}) = 5.8 \text{ Hz}$ , Rot B:  $^3J(2\text{-H}_a, 3\text{-F}) = 5.8 \text{ Hz}$ ]

### Computational observation

The calculated  $\Delta G$  is given for the energetically lowest conformers.

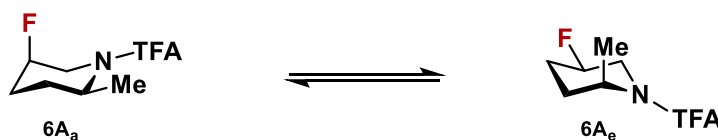

| Solvent         | $\Delta G(a \rightarrow e)$ | $\Delta E_{\text{elect}}$ | $\Delta E_{\text{hyperc}}$ | $\Delta E_{\text{steric}}$ | $\mu_a$ | $\mu_e$ | Experimental |
|-----------------|-----------------------------|---------------------------|----------------------------|----------------------------|---------|---------|--------------|
| $\text{CHCl}_3$ | -3.3                        | +13.4                     | +1.1                       | -17.5                      | 7.6     | 4.8     | equatorial   |
| gas phase       | -3.7                        | +22.5                     | -0.6                       | -25.3                      | 5.6     | 3.7     | -            |

All values are given in kcal/mol at 298 K.

## *cis*-5-Fluoro-2-methylpiperidine hydrochloride (6B)

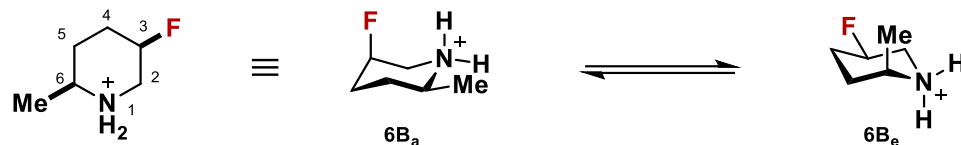

This compound was prepared following a recent literature procedure.<sup>1</sup>

### Experimental observation

In **D<sub>2</sub>O**: The orientation of the fluorine atom was assigned as axial due to the large value of  $^3J(\text{F}, \text{H}_a)$ .<sup>1</sup> [ $^3J(\text{2-H}_a, \text{3-F}) = 40.7 \text{ Hz}$ ]

### Computational observation

The calculated  $\Delta G$  is given for the energetically lowest conformers.

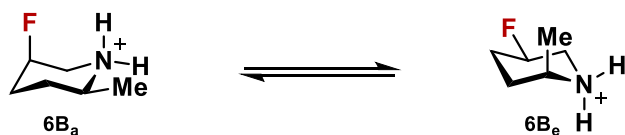

| Solvent               | $\Delta G(a \rightarrow e)$ | $\Delta E_{\text{elect}}$ | $\Delta E_{\text{hyperc}}$ | $\Delta E_{\text{steric}}$ | $\mu_a$ | $\mu_e$ | Experimental |
|-----------------------|-----------------------------|---------------------------|----------------------------|----------------------------|---------|---------|--------------|
| <b>H<sub>2</sub>O</b> | +3.5                        | +11.2                     | +4.3                       | -11.9                      | 5.9     | 8.3     | axial        |
| <b>gas phase</b>      | +6.8                        | +22.2                     | +1.4                       | -16.8                      | 4.3     | 6.3     | -            |

All values are given in kcal/mol at 298 K.



### *cis*-5-Fluoro-2-methylpiperidine (6C)

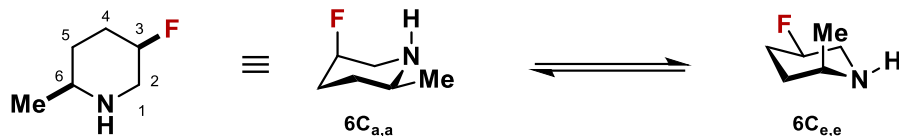

The preparation of this compound is described in the previous section.

#### Experimental observation

In  $D_2O$ : The orientation of the fluorine atom was assigned as axial due to the large values of  $^3J(F, H_a)$ . [ $^3J(2-H_a, 3-F) = 43.3$  Hz,  $^3J(4-H_a, 3-F) = 48.1$  Hz]

NMR spectra contain traces of the corresponding piperidine carboxylic acid due to a fast reaction of the free amine with carbon dioxide.

$^1H$  NMR (600 MHz,  $D_2O$ , 299 K)  $\delta$  4.76 (d,  $J = 47.7$  Hz, 1H overlaps with solvent), 3.14 (ddt,  $J = 14.8, 12.3, 2.7$  Hz, 1H), 2.75 (ddd,  $J = 43.3, 14.3, 1.5$  Hz, 1H), 2.67 – 2.59 (m, 1H), 2.03 (ddt,  $J = 14.8, 11.5, 3.2$  Hz, 1H), 1.68 (dtdd,  $J = 48.1, 14.8, 4.9, 2.3$  Hz, 1H), 1.54 (ddt,  $J = 13.5, 5.1, 2.7$  Hz, 1H), 1.36 (tdd,  $J = 13.5, 11.3, 4.1$  Hz, 1H), 1.04 (d,  $J = 6.4$  Hz, 3H);  $^1H\{^{19}F\}$  NMR (600 MHz,  $D_2O$ , 299 K)  $\delta$  4.76 (s, 1H), 3.14 (d,  $J = 14.2$  Hz, 1H), 2.81 – 2.70 (m, 1H), 2.63 (dtd,  $J = 12.7, 6.4, 2.7$  Hz, 1H), 2.03 (dm,  $J = 14.6$  Hz, 1H), 1.77 – 1.61 (m, 1H), 1.57 – 1.51 (m, 1H), 1.36 (tdd,  $J = 13.5, 11.3, 4.1$  Hz, 1H), 1.04 (d,  $J = 6.4$  Hz, 3H);  $^{13}C$  NMR (151 MHz,  $D_2O$ , 299 K)  $\delta$  87.77 (d,  $J = 163.3$  Hz), 50.21, 48.32 (dm,  $J = 20.2$  Hz), 28.22 (d,  $J = 20.9$  Hz), 27.71, 21.19;  $^{13}C\{sel-^{19}F\text{ at } -186\text{ ppm}\}$  NMR (151 MHz,  $D_2O$ , 299 K)  $\delta$  87.74, 50.20, 48.31, 28.21, 27.70, 21.14;  $^{19}F$  NMR (564 MHz,  $D_2O$ , 299 K)  $\delta$  -186.43 (qt,  $J = 49.2, 12.2$  Hz);  $^{19}F\{^1H\}$  NMR (564 MHz,  $D_2O$ , 299 K)  $\delta$  -186.43.

### Computational observation

The calculated  $\Delta G$  values in different solvents for the energetically lowest conformers are presented. In the scheme, the values of  $\Delta G$  in water ( $\Delta G$  gas phase) are given.

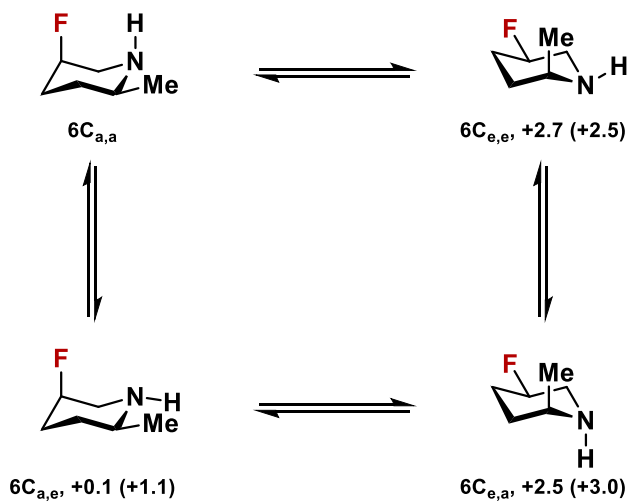

| Solvent          | $\Delta G(a,a \rightarrow e,e)$ | $\Delta E_{\text{elect}}$ | $\Delta E_{\text{hyperc}}$ | $\Delta E_{\text{steric}}$ | $\mu_{a,a}$ | $\mu_{e,e}$ | Experimental |
|------------------|---------------------------------|---------------------------|----------------------------|----------------------------|-------------|-------------|--------------|
| H <sub>2</sub> O | +2.7                            | +11.7                     | +4.0                       | -13.4                      | 2.4         | 2.9         | axial        |
| gas phase        | +2.5                            | +11.6                     | +4.3                       | -13.5                      | 1.6         | 2.3         | -            |

All values are given in kcal/mol at 298 K.

## 2,2,2-Trifluoro-1-(*cis*-5-fluoro-2-(trifluoromethyl)piperidin-1-yl)ethan-1-one (7A)

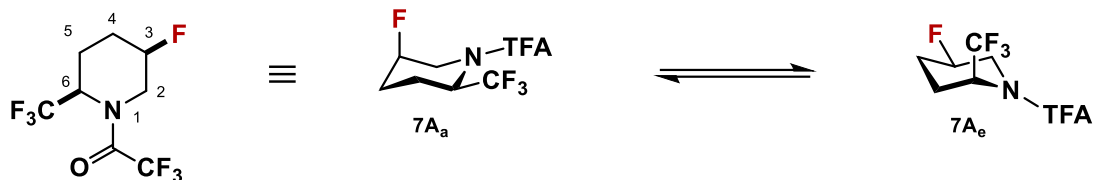

This compound was prepared following a recent literature procedure.<sup>1</sup>

### Experimental observation

In  $\text{CDCl}_3$ : The orientation of the fluorine atom was assigned as equatorial due to the small values of  $^3J(\text{F}, \text{H}_a)$ .<sup>1</sup> [ $^3J(2\text{-H}_a, 3\text{-F}) = 5.8 \text{ Hz}$ ]

### Computational observation

The calculated  $\Delta G$  is given for the energetically lowest conformers.

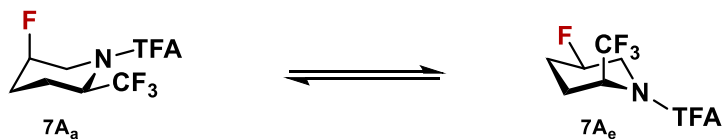

| Solvent         | $\Delta G(a \rightarrow e)$ | $\Delta E_{\text{elect}}$ | $\Delta E_{\text{hyperc}}$ | $\Delta E_{\text{steric}}$ | $\mu_a$ | $\mu_e$ | Experimental |
|-----------------|-----------------------------|---------------------------|----------------------------|----------------------------|---------|---------|--------------|
| $\text{CHCl}_3$ | -4.4                        | +19.6                     | +1.6                       | -25.6                      | 8.4     | 4.0     | equatorial   |
| gas phase       | -6.0                        | +20.8                     | -0.4                       | -26.4                      | 6.2     | 2.9     | -            |

All values are given in kcal/mol at 298 K.

*cis*-5-Fluoro-2-(trifluoromethyl)piperidine hydrochloride (**7B**)

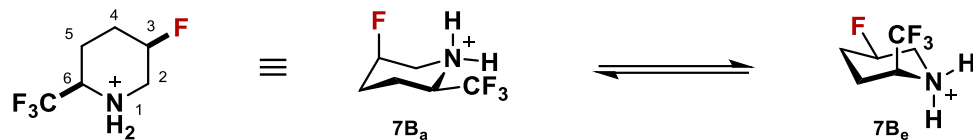

This compound was prepared following a recent literature procedure.<sup>1</sup>

Experimental observation

In  $\text{D}_2\text{O}$ : The orientation of the fluorine atom was assigned as axial due to the large values of  $^3J(\text{F}, \text{H}_a)$ .<sup>1</sup> [ $^3J(2\text{-H}_a, 3\text{-F}) = 39.7 \text{ Hz}$ ,  $^3J(4\text{-H}_a, 3\text{-F}) = 45.0 \text{ Hz}$ ]

Computational observation

The calculated  $\Delta G$  is given for the energetically lowest conformers.

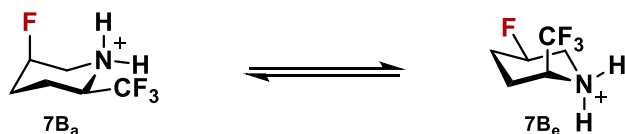

| Solvent               | $\Delta G(a \rightarrow e)$ | $\Delta E_{\text{elect}}$ | $\Delta E_{\text{hyperc}}$ | $\Delta E_{\text{steric}}$ | $\mu_a$ | $\mu_e$ | Experimental |
|-----------------------|-----------------------------|---------------------------|----------------------------|----------------------------|---------|---------|--------------|
| <b>H<sub>2</sub>O</b> | +5.2                        | +19.5                     | +2.3                       | -17.3                      | 7.7     | 9.4     | axial        |
| <b>gas phase</b>      | +7.7                        | +27.6                     | -0.8                       | -19.2                      | 6.3     | 7.0     | -            |

All values are given in kcal/mol at 298 K.

*cis*-5-Fluoro-2-(trifluoromethyl)piperidine (**7C**)

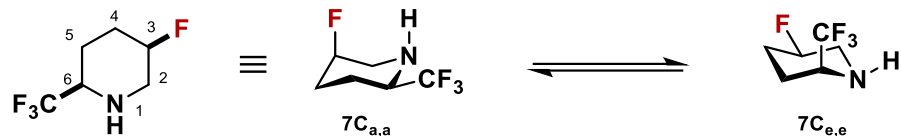

The preparation of this compound is described in the previous section.

Experimental observation

In **D<sub>2</sub>O**: The orientation of the fluorine atom was assigned as axial due to the large value of  $^3J(\text{F},\text{H}_a)$ . [ $^3J(2\text{-H}_a,3\text{-F}) = 41.9 \text{ Hz}$ ]

**<sup>1</sup>H NMR** (600 MHz, D<sub>2</sub>O, 299 K)  $\delta$  4.82 (d,  $J = 45.0 \text{ Hz}$ , 1H overlaps with solvent), 3.34 (ddt,  $J = 14.9, 10.3, 5.0 \text{ Hz}$ , 1H), 3.27 (ddt,  $J = 14.6, 11.9, 2.7 \text{ Hz}$ , 1H), 2.85 (dd,  $J = 41.9, 14.4 \text{ Hz}$ , 1H), 2.23 – 2.15 (m, 1H), 1.86 – 1.69 (m, 3H); **<sup>1</sup>H{<sup>19</sup>F} NMR** (600 MHz, D<sub>2</sub>O, 299 K)  $\delta$  4.83 (bs, 1H), 3.39 – 3.31 (m, 1H), 3.27 (d,  $J = 14.4 \text{ Hz}$ , 1H), 2.85 (dd,  $J = 14.4, 1.4 \text{ Hz}$ , 1H), 2.22 – 2.17 (m, 1H), 1.84 – 1.73 (m, 3H); **<sup>13</sup>C NMR** (151 MHz, D<sub>2</sub>O, 299 K)  $\delta$  125.44 (q,  $J = 278.6 \text{ Hz}$ ), 86.51 (d,  $J = 166.2 \text{ Hz}$ ), 55.97 (q,  $J = 29.2 \text{ Hz}$ ), 47.63 (d,  $J = 20.2 \text{ Hz}$ ), 26.68 (d,  $J = 21.1 \text{ Hz}$ ), 18.65 (d,  $J = 1.7 \text{ Hz}$ ); **<sup>13</sup>C{sel-<sup>19</sup>F at -187 ppm} NMR** (151 MHz, D<sub>2</sub>O, 299 K)  $\delta$  125.45 (q,  $J = 278.3 \text{ Hz}$ ), 86.50, 55.97 (q,  $J = 29.0 \text{ Hz}$ ), 47.64, 26.68, 18.65; **<sup>19</sup>F NMR** (564 MHz, D<sub>2</sub>O, 299 K) -77.19 (d,  $J = 7.2 \text{ Hz}$ ), -186.68 – -188.85 (m); **<sup>19</sup>F{<sup>1</sup>H} NMR** (564 MHz, D<sub>2</sub>O, 299 K)  $\delta$  -77.19, -187.79.

### Computational observation

The calculated  $\Delta G$  values in different solvents for the energetically lowest conformers are presented. In the scheme, the values of  $\Delta G$  in water ( $\Delta G$  gas phase) are given.

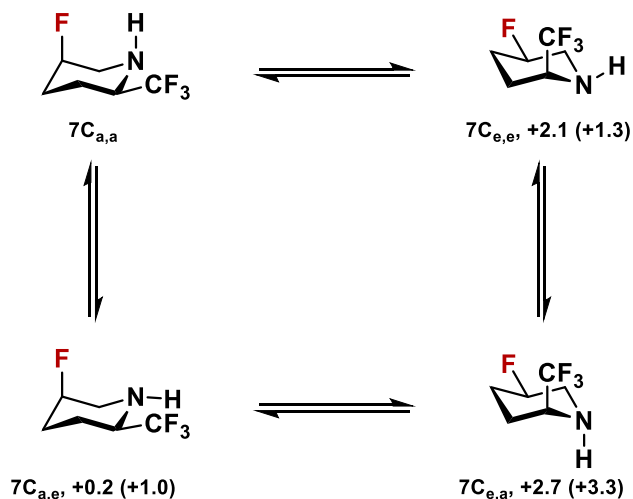

| Solvent          | $\Delta G(a,a \rightarrow e,e)$ | $\Delta E_{\text{elect}}$ | $\Delta E_{\text{hyperc}}$ | $\Delta E_{\text{steric}}$ | $\mu_{a,a}$ | $\mu_{e,e}$ | Experimental |
|------------------|---------------------------------|---------------------------|----------------------------|----------------------------|-------------|-------------|--------------|
| H <sub>2</sub> O | +2.1                            | +32.5                     | -2.2                       | -28.4                      | 4.7         | 2.8         | axial        |
| gas phase        | +1.3                            | +30.7                     | -0.6                       | -29.0                      | 3.4         | 2.1         | -            |

All values are given in kcal/mol at 298 K.

## 2,2,2-Trifluoro-1-(*cis*-3-fluoro-4,5-dimethylpiperidin-1-yl)ethan-1-one (8A)

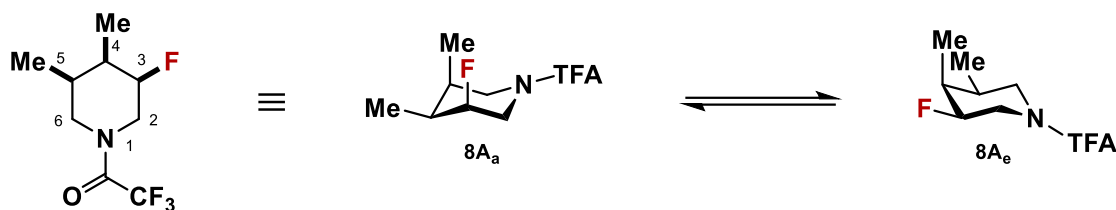

This compound was prepared following a recent literature procedure.<sup>1</sup>

### Experimental observation

The product was present as a ~1:1 mixture of amide bond rotamers.

In  $\text{CDCl}_3$ : The orientation of the fluorine atom was assigned as axial due to the large values of  $^3J(\text{F}, \text{H}_a)$ .<sup>1</sup> [Rot A:  $^3J(2\text{-H}_a, 3\text{-F}) = 30.4 \text{ Hz}$ ,  $^3J(4\text{-H}_a, 3\text{-F}) = 27.0 \text{ Hz}$ , Rot B:  $^3J(2\text{-H}_a, 3\text{-F}) = 30.4 \text{ Hz}$ ,  $^3J(4\text{-H}_a, 3\text{-F}) = 27.0 \text{ Hz}$ ]

### Computational observation

The calculated  $\Delta G$  is given for the energetically lowest conformers.

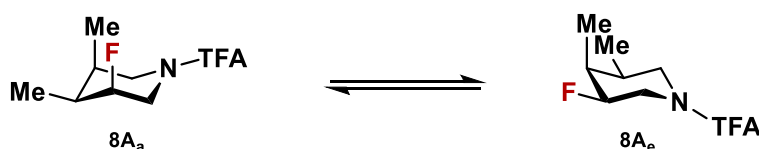

| Solvent         | $\Delta G(a \rightarrow e)$ | $\Delta E_{\text{elect}}$ | $\Delta E_{\text{hyperc}}$ | $\Delta E_{\text{steric}}$ | $\mu_a$ | $\mu_e$ | Experimental |
|-----------------|-----------------------------|---------------------------|----------------------------|----------------------------|---------|---------|--------------|
| $\text{CHCl}_3$ | +0.6                        | -0.3                      | +7.3                       | -6.2                       | 7.4     | 5.8     | axial        |
| gas phase       | +0.2                        | -3.6                      | +7.0                       | -3.1                       | 5.4     | 4.8     | -            |

All values are given in kcal/mol at 298 K.

### *cis*-3-Fluoro-4,5-dimethylpiperidine hydrochloride (8B)

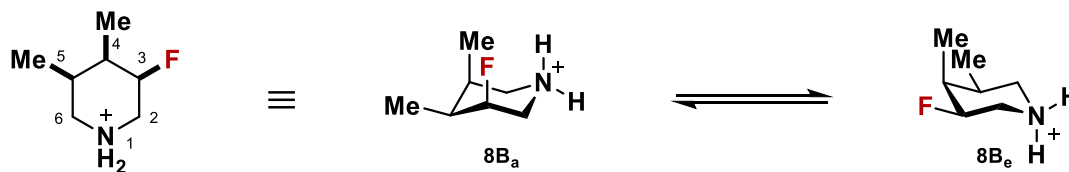

This compound was prepared following a recent literature procedure.<sup>1</sup>

#### Experimental observation

In **D<sub>2</sub>O**: The orientation of the fluorine atom was assigned as axial due to the large value of  $^3J(\text{F}, \text{H}_a)$ .<sup>1</sup> [ $^3J(2\text{-H}_a, 3\text{-F}) = 34.3 \text{ Hz}$ ]

#### Computational observation

The calculated  $\Delta G$  is given for the energetically lowest conformers.

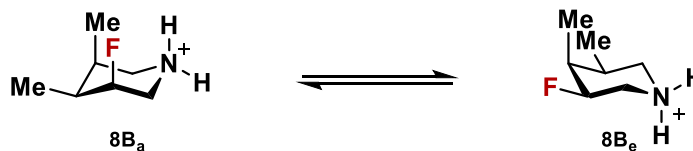

| Solvent               | $\Delta G(\text{a} \rightarrow \text{e})$ | $\Delta E_{\text{elect}}$ | $\Delta E_{\text{hyperc}}$ | $\Delta E_{\text{steric}}$ | $\mu_{\text{a}}$ | $\mu_{\text{e}}$ | Experimental |
|-----------------------|-------------------------------------------|---------------------------|----------------------------|----------------------------|------------------|------------------|--------------|
| <b>H<sub>2</sub>O</b> | +1.1                                      | +17.0                     | +6.3                       | -21.8                      | 8.5              | 9.6              | axial        |
| <b>gas phase</b>      | +4.2                                      | +24.5                     | +2.5                       | -22.7                      | 6.0              | 7.1              | -            |

All values are given in kcal/mol at 298 K.



***cis*-3-Fluoro-4,5-dimethylpiperidine (8C)**

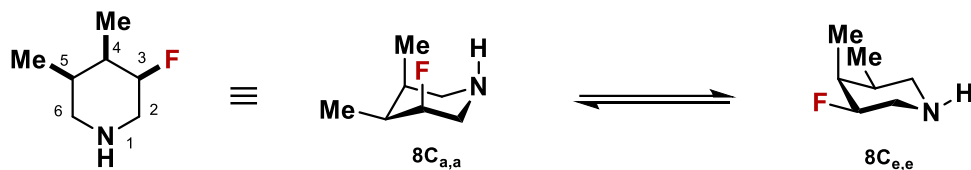

The preparation of this compound is described in the previous section.

Experimental observation

In **D<sub>2</sub>O**: The dominant orientation of the fluorine atoms is assigned to be axial based on the values of  $^3J(\text{F},\text{H}_a)$ . [ $^3J(2\text{-H}_a,3\text{-F}) = 26.0 \text{ Hz}$ ,  $^3J(4\text{-H}_a,3\text{-F}) = 26.3 \text{ Hz}$ ]

NMR spectra contain mixture of diastereomers originated from the recently reported procedure (*d.r.* 95:5:0).<sup>1</sup> Only the signals of the major diastereomer are listed. The NMR spectra also contain traces of the corresponding piperidine carboxylic acid due to a fast reaction of the free amine with carbon dioxide.

**<sup>1</sup>H NMR** (600 MHz, D<sub>2</sub>O, 299 K)  $\delta$  4.64 (ddt,  $J = 48.0, 6.6, 3.4 \text{ Hz}$ , 1H), 2.95 (ddd,  $J = 13.7, 9.4, 6.4 \text{ Hz}$ , 1H), 2.79 (ddd,  $J = 26.0, 13.6, 3.3 \text{ Hz}$ , 1H), 2.67 – 2.58 (m, 2H), 2.06 (dm,  $J = 26.3 \text{ Hz}$ , 1H), 1.75 (ddp,  $J = 11.5, 7.1, 4.4, 3.6 \text{ Hz}$ , 1H), 0.97 (d,  $J = 7.2 \text{ Hz}$ , 3H), 0.95 (dd,  $J = 7.3, 1.8 \text{ Hz}$ , 3H); **<sup>1</sup>H{<sup>19</sup>F} NMR** (600 MHz, D<sub>2</sub>O, 299 K)  $\delta$  4.64 (bs, 1H), 2.95 (dd,  $J = 13.5, 6.4 \text{ Hz}$ , 1H), 2.78 (dd,  $J = 13.7, 3.2 \text{ Hz}$ , 1H), 2.67 – 2.58 (m, 2H), 2.12 – 2.01 (m, 1H), 1.75 (ddt,  $J = 9.8, 7.0, 3.5 \text{ Hz}$ , 1H), 0.97 (d,  $J = 7.2 \text{ Hz}$ , 3H), 0.95 (d,  $J = 7.3 \text{ Hz}$ , 3H); **<sup>13</sup>C NMR** (151 MHz, D<sub>2</sub>O, 299 K)  $\delta$  93.10 (d,  $J = 171.0 \text{ Hz}$ ), 48.08, 45.64 (dm,  $J = 20.5 \text{ Hz}$ ), 35.71 (d,  $J = 17.2 \text{ Hz}$ ), 32.27 (d,  $J = 1.9 \text{ Hz}$ ), 13.84 (d,  $J = 3.5 \text{ Hz}$ ), 9.86 (bs); **<sup>13</sup>C{sel-<sup>19</sup>F at -188 ppm} NMR** (151 MHz, D<sub>2</sub>O, 299 K)  $\delta$  93.08, 48.07, 45.64, 35.70, 32.26, 13.83, 9.88; **<sup>19</sup>F NMR** (564 MHz, D<sub>2</sub>O, 299 K)  $\delta$  -188.53 (bs); **<sup>19</sup>F{<sup>1</sup>H} NMR** (564 MHz, D<sub>2</sub>O, 299 K)  $\delta$  -188.56 (bs).

### Computational observation

The calculated  $\Delta G$  values in different solvents for the energetically lowest conformers are presented. In the scheme, the values of  $\Delta G$  in water ( $\Delta G$  gas phase) are given.

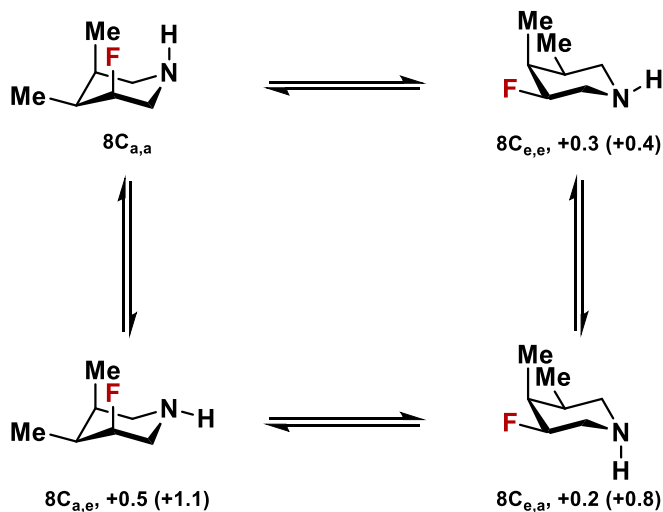

| Solvent          | $\Delta G(a,a \rightarrow e,e)$ | $\Delta E_{\text{elect}}$ | $\Delta E_{\text{hyperc}}$ | $\Delta E_{\text{steric}}$ | $\mu_{a,a}$ | $\mu_{e,e}$ | Experimental |
|------------------|---------------------------------|---------------------------|----------------------------|----------------------------|-------------|-------------|--------------|
| H <sub>2</sub> O | +0.3                            | +20.1                     | +8.6                       | -28.4                      | 2.4         | 2.8         | axial        |
| gas phase        | +0.4                            | +17.6                     | +8.5                       | -25.8                      | 1.6         | 2.1         | -            |

All values are given in kcal/mol at 298 K.

**1-(*cis*-3,5-Difluoro-4-methylpiperidin-1-yl)-2,2,2-trifluoroethan-1-one (9A)**

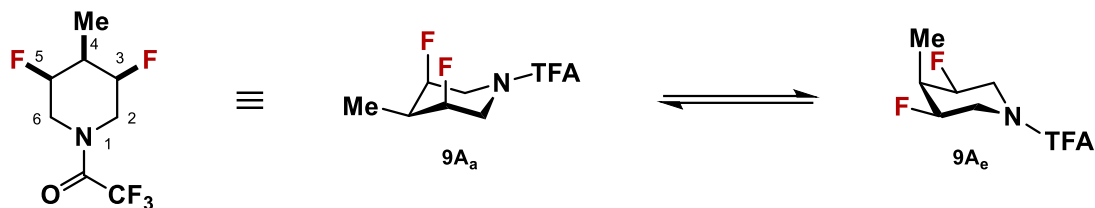

This compound was prepared following a recent literature procedure.<sup>1</sup>

Experimental observation

In CDCl<sub>3</sub>: The orientation of the fluorine atoms was assigned as axial due to the large values of <sup>3</sup>J(F,H<sub>a</sub>).<sup>1</sup> [<sup>3</sup>J(2-H<sub>a</sub>,3-F) = 37.8 Hz, <sup>3</sup>J(4-H<sub>a</sub>,3-F) = 34.9 Hz, <sup>3</sup>J(4-H<sub>a</sub>,5-F) = 34.9 Hz, <sup>3</sup>J(6-H<sub>a</sub>,5-F) = 35.6 Hz]

Computational observation

The calculated ΔG is given for the energetically lowest conformers.

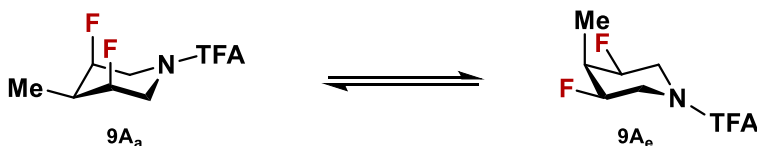

| Solvent           | ΔG(a→e) | ΔE <sub>elect</sub> | ΔE <sub>hyperc</sub> | ΔE <sub>steric</sub> | μ <sub>a</sub> | μ <sub>e</sub> | Experimental |
|-------------------|---------|---------------------|----------------------|----------------------|----------------|----------------|--------------|
| CHCl <sub>3</sub> | +2.2    | +8.1                | +12.2                | -18.2                | 8.7            | 3.4            | axial        |
| gas phase         | +0.1    | +5.0                | +12.2                | -17.4                | 6.3            | 2.6            | -            |

All values are given in kcal/mol at 298 K.

*cis*-3,5-Difluoro-4-methylpiperidine hydrochloride (**9B**)

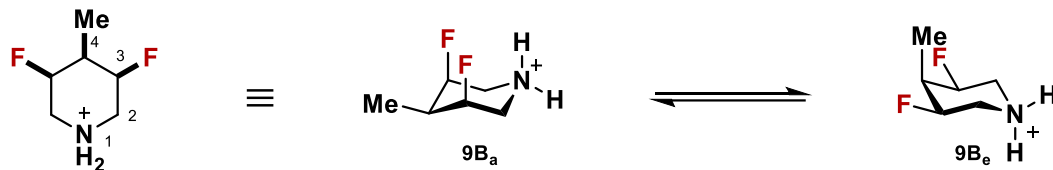

This compound was prepared following a recent literature procedure.<sup>1</sup>

Experimental observation

In **D<sub>2</sub>O**: The orientation of the fluorine atoms was assigned as axial due to the large values of  $^3J(\text{F}, \text{H}_a)$ .<sup>1</sup> [ $^3J(2\text{-H}_a, 3\text{-F}) = 40.9 \text{ Hz}$ ,  $^3J(4\text{-H}_a, 3\text{-F}) = 38.1 \text{ Hz}$ ]

Computational observation

The calculated  $\Delta G$  is given for the energetically lowest conformers.

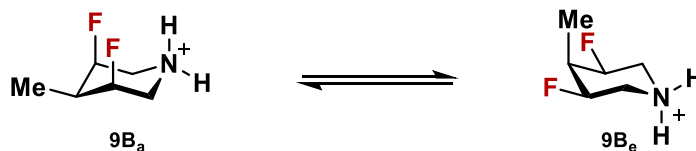

| Solvent               | $\Delta G(\text{a} \rightarrow \text{e})$ | $\Delta E_{\text{elect}}$ | $\Delta E_{\text{hyperc}}$ | $\Delta E_{\text{steric}}$ | $\mu_a$ | $\mu_e$ | Experimental |
|-----------------------|-------------------------------------------|---------------------------|----------------------------|----------------------------|---------|---------|--------------|
| <b>H<sub>2</sub>O</b> | +5.1                                      | +11.5                     | +10.4                      | -16.3                      | 10.0    | 10.6    | axial        |
| <b>gas phase</b>      | +9.5                                      | +21.8                     | +4.9                       | -17.1                      | 7.2     | 8.0     | -            |

All values are given in kcal/mol at 298 K.

*cis*-3,5-Difluoro-4-methylpiperidine (**9C**)

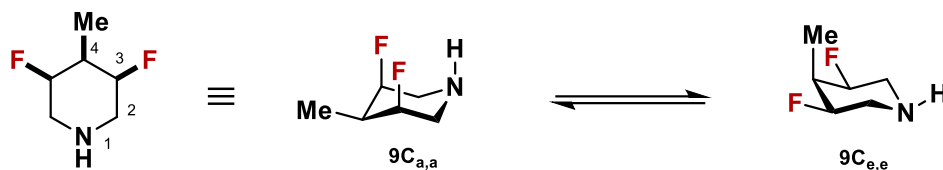

The preparation of this compound is described in the previous section.

Experimental observation

In **D<sub>2</sub>O**: The orientation of the fluorine atoms was assigned as axial due to the large values of  $^3J(\text{F},\text{H}_a)$ . [ $^3J(2\text{-H}_a,3\text{-F}) = 43.3 \text{ Hz}$ ,  $^3J(4\text{-H}_a,3\text{-F}) = 39.4 \text{ Hz}$ ]

**<sup>1</sup>H NMR** (600 MHz, D<sub>2</sub>O, 299 K) δ 4.63 (dd,  $J = 47.9, 2.2 \text{ Hz}$ , 2H), 3.24 (t,  $J = 13.5 \text{ Hz}$ , 2H), 2.76 (dd,  $J = 43.3, 14.8 \text{ Hz}$ , 2H), 1.95 (tm,  $J = 39.4 \text{ Hz}$ , 1H), 1.16 (d,  $J = 7.2 \text{ Hz}$ , 3H); **<sup>1</sup>H{<sup>19</sup>F} NMR** (600 MHz, D<sub>2</sub>O, 299 K) δ 4.64 – 4.61 (m, 2H), 3.24 (d,  $J = 14.9 \text{ Hz}$ , 2H), 2.76 (d,  $J = 15.1 \text{ Hz}$ , 2H), 1.98 – 1.91 (m, 1H), 1.16 (d,  $J = 7.2 \text{ Hz}$ , 3H); **<sup>13</sup>C NMR** (151 MHz, D<sub>2</sub>O, 299 K) δ 90.65 (d,  $J = 173.3 \text{ Hz}$ ), 47.84 – 47.51 (m), 35.29 (t,  $J = 19.2 \text{ Hz}$ ), 12.48; **<sup>13</sup>C{sel-<sup>19</sup>F at -197 ppm} NMR** (151 MHz, D<sub>2</sub>O, 299 K) δ 90.64, 47.69, 35.28, 12.46; **<sup>19</sup>F NMR** (564 MHz, D<sub>2</sub>O, 299 K) δ -196.89 – -197.33 (m); **<sup>19</sup>F{<sup>1</sup>H} NMR** (564 MHz, D<sub>2</sub>O, 299 K) δ -197.11.

### Computational observation

The calculated  $\Delta G$  values in different solvents for the energetically lowest conformers are presented. In the scheme, the values of  $\Delta G$  in water ( $\Delta G$  gas phase) are given.

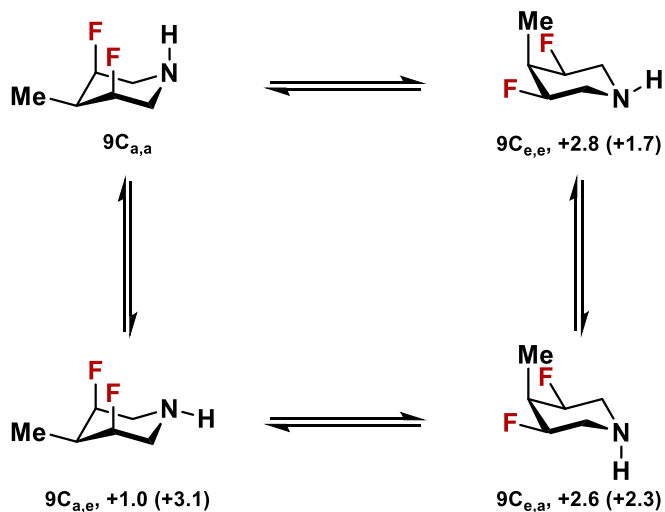

| Solvent          | $\Delta G(a,a \rightarrow e,e)$ | $\Delta E_{\text{elect}}$ | $\Delta E_{\text{hyperc}}$ | $\Delta E_{\text{steric}}$ | $\mu_{a,a}$ | $\mu_{e,e}$ | Experimental |
|------------------|---------------------------------|---------------------------|----------------------------|----------------------------|-------------|-------------|--------------|
| H <sub>2</sub> O | +2.8                            | +19.0                     | +12.0                      | -28.4                      | 4.4         | 2.6         | axial        |
| gas phase        | +1.7                            | +18.6                     | +12.8                      | -29.8                      | 2.9         | 2.0         | -            |

All values are given in kcal/mol at 298 K.

## 2,2,2-Trifluoro-1-(4-fluoropiperidin-1-yl)ethan-1-one (10A)

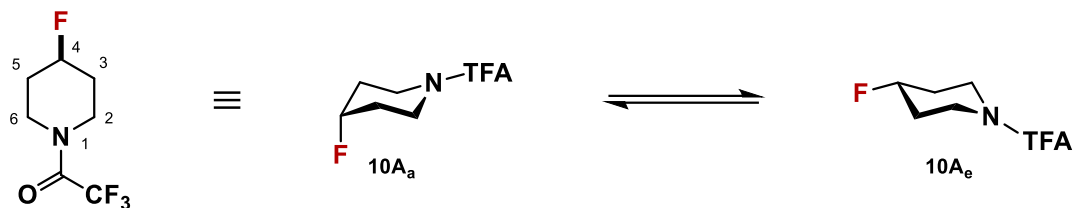

This compound was prepared following a recent literature procedure.<sup>1</sup>

### Experimental observation

In  $\text{CDCl}_3$ : The orientation of the fluorine atom was assigned as axial due to the large values of  $^3J(\text{F}, \text{H}_a)$ .<sup>1</sup> [ $^3J(3\text{-H}_a, 4\text{-F}) = 34.5 \text{ Hz}$ ,  $^3J(5\text{-H}_a, 4\text{-F}) = 34.5 \text{ Hz}$ ]

### Computational observation

The calculated  $\Delta G$  is given for the energetically lowest conformers.

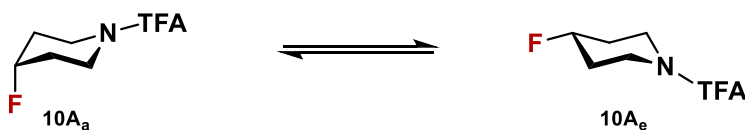

| Solvent         | $\Delta G(a \rightarrow e)$ | $\Delta E_{\text{elect}}$ | $\Delta E_{\text{hyperc}}$ | $\Delta E_{\text{steric}}$ | $\mu_a$ | $\mu_e$ | Experimental |
|-----------------|-----------------------------|---------------------------|----------------------------|----------------------------|---------|---------|--------------|
| $\text{CHCl}_3$ | +0.4                        | +6.7                      | +1.6                       | -8.1                       | 5.0     | 4.9     | axial        |
| gas phase       | +0.7                        | +9.6                      | +0.6                       | -9.5                       | 3.9     | 3.7     | -            |

All values are given in kcal/mol at 298 K.

## 4-Fluoropiperidine hydrochloride (10B)

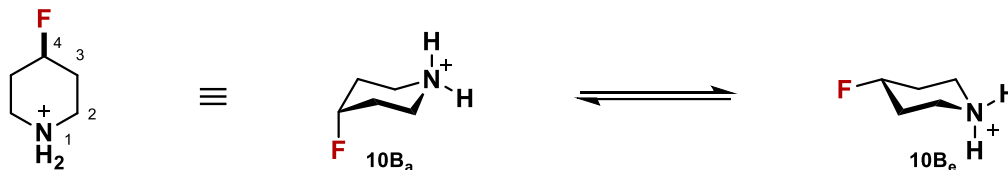

This compound was prepared following a recent literature procedure.<sup>1</sup>

### Experimental observation

In **D<sub>2</sub>O**: Due to peaks overlapping and broadening in NMR spectra, we could not verify the orientation of the fluorine atom through  $^3J(\text{F},\text{H}_a)$  values. Therefore additional NMR studies that includes NOE and HF/FH-HetNOE experiments were conducted.<sup>1</sup> All those experiments showed a dynamic behavior where the equilibrium favors equatorial fluorine orientation.<sup>1</sup>

### Computational observation

The calculated  $\Delta G$  is given for the energetically lowest conformers.

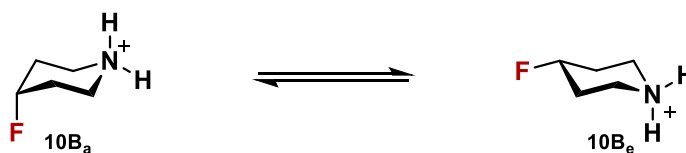

| Solvent               | $\Delta G(\text{a} \rightarrow \text{e})$ | $\Delta E_{\text{elect}}$ | $\Delta E_{\text{hyperc}}$ | $\Delta E_{\text{steric}}$ | $\mu_a$ | $\mu_e$ | Experimental        |
|-----------------------|-------------------------------------------|---------------------------|----------------------------|----------------------------|---------|---------|---------------------|
| <b>H<sub>2</sub>O</b> | +1.0                                      | +12.4                     | 2.5                        | -14.2                      | 8.5     | 10.2    | equatorial dominant |
| <b>gas phase</b>      | +3.0                                      | +21.5                     | -0.1                       | -18.2                      | 6.4     | 8.0     | -                   |

All values are given in kcal/mol at 298 K.



## 4-Fluoropiperidine (10C)

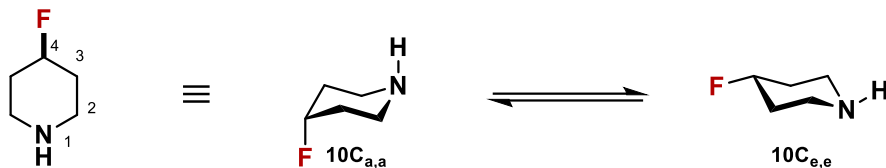

The preparation of this compound is described in the previous section.

### Experimental observation

In **D<sub>2</sub>O**: The orientation of the fluorine atom was assigned as equatorial due to the small value of  $^3J(\text{F},\text{H}_a)$ . [ $^3J(\text{3-H}_a,4\text{-F}) = 10.6 \text{ Hz}$ ]

The NMR spectra contain traces of defluorinated side-product, originated from the recently reported procedure,<sup>1</sup> which were inseparable from the product.

**<sup>1</sup>H NMR** (600 MHz, D<sub>2</sub>O, 299 K)  $\delta$  4.91 (dtt,  $J = 48.3, 7.3, 3.5 \text{ Hz}$ , 1H), 3.08 (dtt,  $J = 11.7, 7.3, 3.4 \text{ Hz}$ , 2H), 2.81 (ddd,  $J = 12.4, 7.5, 4.0 \text{ Hz}$ , 2H), 1.99 (dddd,  $J = 25.5, 12.1, 8.2, 3.8 \text{ Hz}$ , 2H), 1.81 (dddd,  $J = 21.1, 10.6, 7.4, 4.4 \text{ Hz}$ , 2H); **<sup>1</sup>H{<sup>19</sup>F} NMR** (600 MHz, D<sub>2</sub>O, 299 K)  $\delta$  4.90 (bs, 1H), 3.08 (ddd,  $J = 12.3, 8.0, 3.9 \text{ Hz}$ , 2H), 2.81 (ddd,  $J = 12.4, 7.5, 4.0 \text{ Hz}$ , 2H), 2.04 – 1.95 (m, 2H), 1.85 – 1.76 (m, 2H); **<sup>13</sup>C NMR** (151 MHz, D<sub>2</sub>O, 299 K)  $\delta$  89.49 (d,  $J = 166.3 \text{ Hz}$ ), 41.13 (d,  $J = 6.6 \text{ Hz}$ ), 30.44 (d,  $J = 19.0 \text{ Hz}$ ); **<sup>13</sup>C{sel-<sup>19</sup>F at -176 ppm} NMR** (151 MHz, D<sub>2</sub>O, 299 K)  $\delta$  89.50, 41.13, 30.44; **<sup>19</sup>F NMR** (564 MHz, D<sub>2</sub>O, 299 K)  $\delta$  -176.16 (bs); **<sup>19</sup>F{<sup>1</sup>H} NMR** (564 MHz, D<sub>2</sub>O, 299 K)  $\delta$  -176.16 (bs).

### Computational observation

The calculated  $\Delta G$  values in different solvents for the energetically lowest conformers are presented. In the scheme, the values of  $\Delta G$  in water ( $\Delta G$  gas phase) are given.

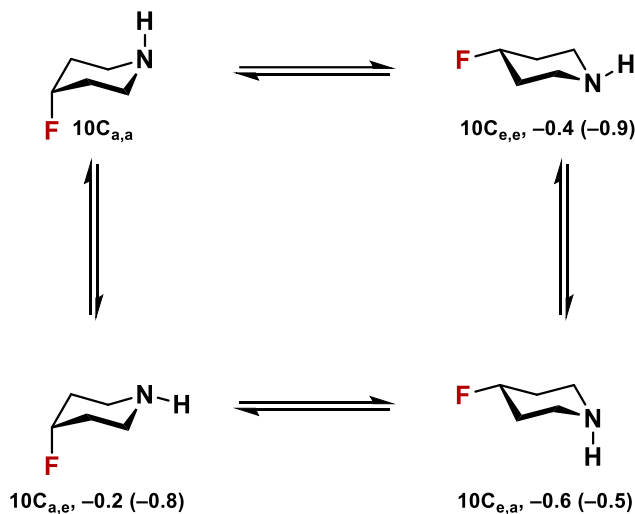

| Solvent               | $\Delta G(a,a \rightarrow e,e)$ | $\Delta E_{\text{elect}}$ | $\Delta E_{\text{hyperc}}$ | $\Delta E_{\text{steric}}$ | $\mu_{a,a}$ | $\mu_{e,e}$ | Experimental |
|-----------------------|---------------------------------|---------------------------|----------------------------|----------------------------|-------------|-------------|--------------|
| <b>H<sub>2</sub>O</b> | -0.4                            | +17.1                     | +2.8                       | -20.6                      | 3.4         | 3.6         | equatorial   |
| <b>gas phase</b>      | -0.9                            | +8.1                      | +1.9                       | -10.8                      | 2.4         | 2.7         | -            |

All values are given in kcal/mol at 298 K.

## 2,2,2-Trifluoro-1-(*cis*-4-fluoro-3-methylpiperidin-1-yl)ethan-1-one (11A)

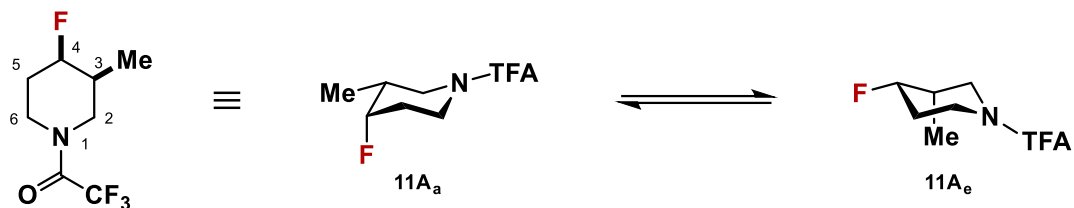

This compound was prepared following a recent literature procedure.<sup>1</sup>

### Experimental observation

The product was present as a ~1:1 mixture of amide bond rotamers.

In  $\text{CDCl}_3$ : The orientation of the fluorine atom was assigned as axial due to the large values of  $^3J(\text{F}, \text{H}_a)$ .<sup>1</sup> [Rot A:  $^3J(3\text{-H}_a, 4\text{-F}) = 33.5 \text{ Hz}$ ,  $^3J(5\text{-H}_a, 4\text{-F}) = 41.2 \text{ Hz}$ , Rot B:  $^3J(3\text{-H}_a, 4\text{-F}) = 33.5 \text{ Hz}$ ,  $^3J(5\text{-H}_a, 4\text{-F}) = 41.2 \text{ Hz}$ ]

### Computational observation

The calculated  $\Delta G$  is given for the energetically lowest conformers.

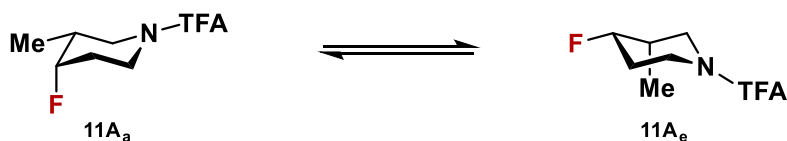

| Solvent         | $\Delta G(\text{a} \rightarrow \text{e})$ | $\Delta E_{\text{elect}}$ | $\Delta E_{\text{hyperc}}$ | $\Delta E_{\text{steric}}$ | $\mu_a$ | $\mu_e$ | Experimental |
|-----------------|-------------------------------------------|---------------------------|----------------------------|----------------------------|---------|---------|--------------|
| $\text{CHCl}_3$ | +1.7                                      | +4.2                      | +1.2                       | -4.4                       | 5.0     | 4.7     | axial        |
| gas phase       | +1.8                                      | +0.7                      | +0.4                       | +0.2                       | 3.9     | 3.4     | -            |

All values are given in kcal/mol at 298 K.

## *cis*-4-Fluoro-3-methylpiperidine hydrochloride (11B)

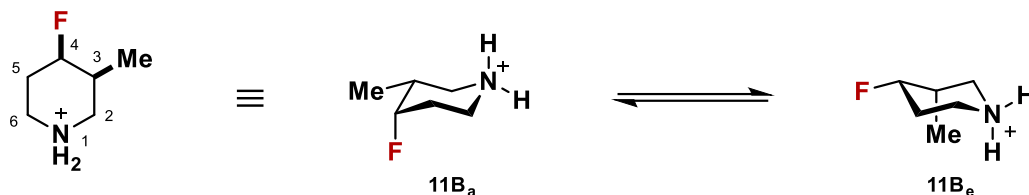

This compound was prepared following a recent literature procedure.<sup>1</sup>

### Experimental observation

In **D<sub>2</sub>O**: The orientation of the fluorine atom was assigned as axial due to the large values of  $^3J(\text{F},\text{H}_a)$ .<sup>1</sup> [ $^3J(\text{3-H}_a,4\text{-F}) = 34.5 \text{ Hz}$ ,  $^3J(\text{5-H}_a,4\text{-F}) = 43.3 \text{ Hz}$ ]

### Computational observation

The calculated  $\Delta G$  is given for the energetically lowest conformers.

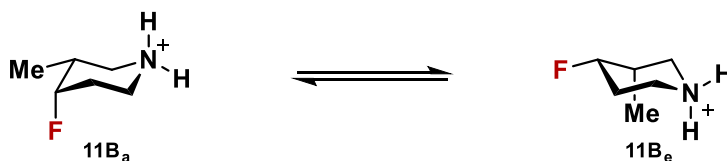

| Solvent               | $\Delta G(\text{a} \rightarrow \text{e})$ | $\Delta E_{\text{elect}}$ | $\Delta E_{\text{hyperc}}$ | $\Delta E_{\text{steric}}$ | $\mu_{\text{a}}$ | $\mu_{\text{e}}$ | Experimental |
|-----------------------|-------------------------------------------|---------------------------|----------------------------|----------------------------|------------------|------------------|--------------|
| <b>H<sub>2</sub>O</b> | +2.3                                      | +7.1                      | +0.8                       | -5.5                       | 9.1              | 10.3             | axial        |
| <b>gas phase</b>      | +3.9                                      | +8.1                      | -1.6                       | -2.7                       | 6.7              | 7.8              | -            |

All values are given in kcal/mol at 298 K.

### *cis*-4-Fluoro-3-methylpiperidine (11C)

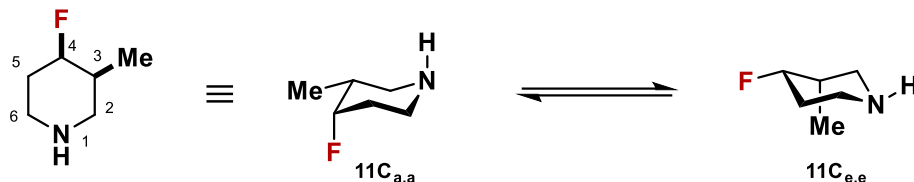

The preparation of this compound is described in the previous section.

#### Experimental observation

In  $\text{D}_2\text{O}$ : The orientation of the fluorine atom was assigned as axial due to the large values of  $^3J(\text{F},\text{H}_a)$ . [ $^3J(\text{3-H}_a,4\text{-F}) = 35.6 \text{ Hz}$ ,  $^3J(\text{5-H}_a,4\text{-F}) = 43.0 \text{ Hz}$ ]

$^1\text{H}$  NMR (600 MHz,  $\text{D}_2\text{O}$ , 299 K)  $\delta$  4.85 (dm,  $J = 49.2 \text{ Hz}$ , 1H), 2.79 – 2.72 (m, 3H), 2.55 (ddd,  $J = 12.6, 10.9, 1.6 \text{ Hz}$ , 1H), 2.01 – 1.93 (m, 1H), 1.83 (dm,  $J = 35.6 \text{ Hz}$ , 1H overlaps with 5- $\text{H}_a$ ), 1.72 (dm,  $J = 43.0 \text{ Hz}$ , 1H overlaps with 3- $\text{H}_a$ ), 0.95 (d,  $J = 7.0 \text{ Hz}$ , 3H);  $^1\text{H}\{^{19}\text{F}\}$  NMR (600 MHz,  $\text{D}_2\text{O}$ , 299 K)  $\delta$  4.85 (bs, 1H), 2.79 – 2.72 (m, 3H), 2.55 (dd,  $J = 12.7, 11.0 \text{ Hz}$ , 1H), 1.97 (dq,  $J = 14.6, 3.4 \text{ Hz}$ , 1H), 1.87 – 1.79 (m, 1H), 1.77 – 1.68 (m, 1H), 0.95 (d,  $J = 7.0 \text{ Hz}$ , 3H);  $^{13}\text{C}$  NMR (151 MHz,  $\text{D}_2\text{O}$ , 299 K)  $\delta$  92.99 (d,  $J = 166.5 \text{ Hz}$ ), 46.47 (d,  $J = 2.2 \text{ Hz}$ ), 39.25, 34.18 (d,  $J = 19.2 \text{ Hz}$ ), 30.12 (d,  $J = 20.2 \text{ Hz}$ ), 13.66 (d,  $J = 4.3 \text{ Hz}$ );  $^{13}\text{C}\{\text{sel-}^{19}\text{F} \text{ at } -198 \text{ ppm}\}$  NMR (151 MHz,  $\text{D}_2\text{O}$ , 299 K)  $\delta$  92.99, 46.47, 39.25, 34.18, 30.12, 13.66;  $^{19}\text{F}$  NMR (564 MHz,  $\text{D}_2\text{O}$ , 299 K)  $\delta$  -198.52 (bs);  $^{19}\text{F}\{^1\text{H}\}$  NMR (564 MHz,  $\text{D}_2\text{O}$ , 299 K)  $\delta$  -198.62 (bs).

### Computational observation

The calculated  $\Delta G$  values in different solvents for the energetically lowest conformers are presented. In the scheme, the values of  $\Delta G$  in water ( $\Delta G$  gas phase) are given.

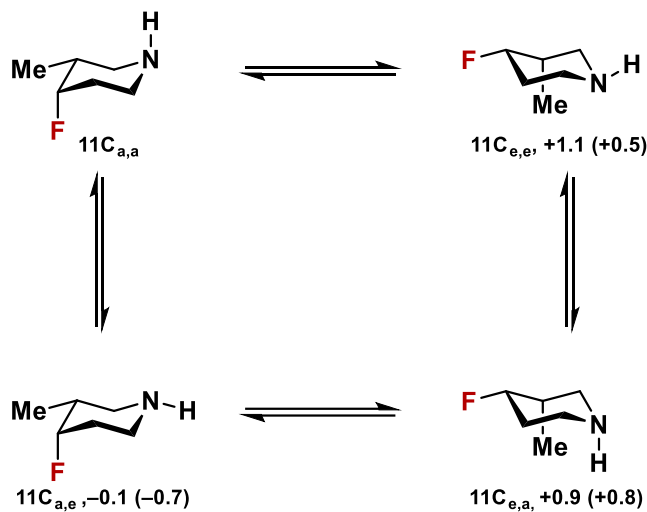

| Solvent          | $\Delta G(a,a \rightarrow e,e)$ | $\Delta E_{\text{elect}}$ | $\Delta E_{\text{hyperc}}$ | $\Delta E_{\text{steric}}$ | $\mu_{a,a}$ | $\mu_{e,e}$ | Experimental |
|------------------|---------------------------------|---------------------------|----------------------------|----------------------------|-------------|-------------|--------------|
| H <sub>2</sub> O | +1.1                            | -4.9                      | +2.8                       | +2.8                       | 3.5         | 3.6         | axial        |
| gas phase        | +0.5                            | +4.8                      | +2.1                       | -6.6                       | 2.3         | 2.6         | -            |

All values are given in kcal/mol at 298 K.

## 2,2,2-Trifluoro-1-(*cis*-4-fluoro-2-methylpiperidin-1-yl)ethan-1-one (12A)

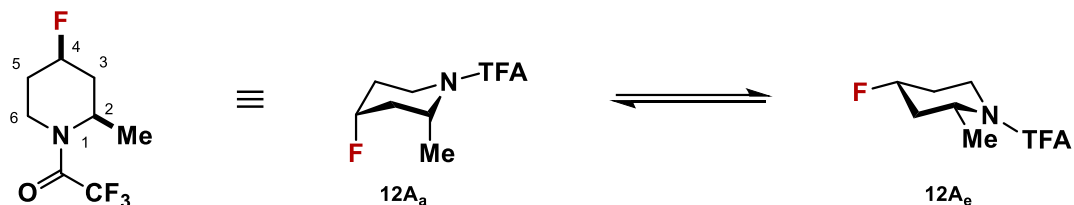

This compound was prepared following a recent literature procedure.<sup>1</sup>

### Experimental observation

The product was present as a ~1:1 mixture of amide bond rotamers.

In  $\text{CDCl}_3$ : The orientation of the fluorine atom was assigned as axial due to the large values of  $^3J(\text{F}, \text{H}_a)$ .<sup>1</sup> [Rot A:  $^3J(3\text{-H}_a, 4\text{-F}) = 47.0 \text{ Hz}$ ,  $^3J(5\text{-H}_a, 4\text{-F}) = 44.0 \text{ Hz}$ , Rot B:  $^3J(3\text{-H}_a, 4\text{-F}) = 47.0 \text{ Hz}$ ,  $^3J(5\text{-H}_a, 4\text{-F}) = 44.0 \text{ Hz}$ ]

### Computational observation

The calculated  $\Delta G$  is given for the energetically lowest conformers.

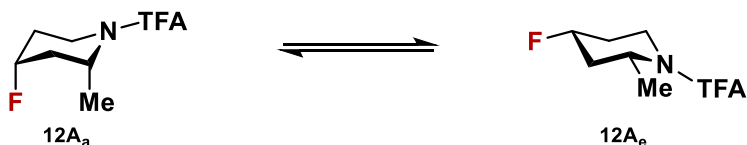

| Solvent         | $\Delta G(a \rightarrow e)$ | $\Delta E_{\text{elect}}$ | $\Delta E_{\text{hyperc}}$ | $\Delta E_{\text{steric}}$ | $\mu_a$ | $\mu_e$ | Experimental |
|-----------------|-----------------------------|---------------------------|----------------------------|----------------------------|---------|---------|--------------|
| $\text{CHCl}_3$ | +3.6                        | +11.8                     | +4.1                       | -12.4                      | 5.1     | 5.4     | axial        |
| gas phase       | +3.7                        | +15.2                     | +3.5                       | -15.1                      | 4.0     | 3.9     | -            |

All values are given in kcal/mol at 298 K.

## *cis*-4-Fluoro-2-methylpiperidine hydrochloride (12B)

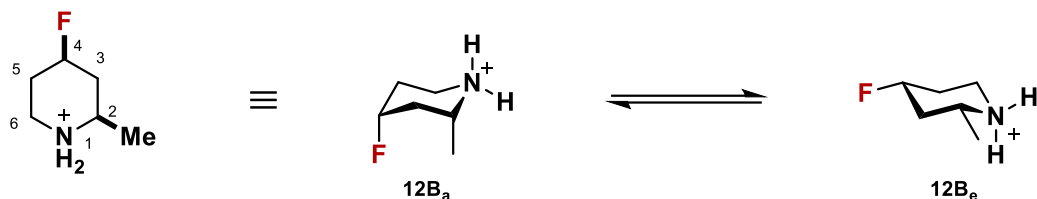

This compound was prepared following a recent literature procedure.<sup>1</sup>

### Experimental observation

In **D<sub>2</sub>O**: The orientation of the fluorine atom was assigned as equatorial due to the small values of  $^3J(\text{F}, \text{H}_a)$ .<sup>1</sup> [ $^3J(\text{3-H}_a, \text{4-F}) = 10.5 \text{ Hz}$ ,  $^3J(\text{5-H}_a, \text{4-F}) = 10.0 \text{ Hz}$ ]

### Computational observation

The calculated  $\Delta G$  is given for the energetically lowest conformers.

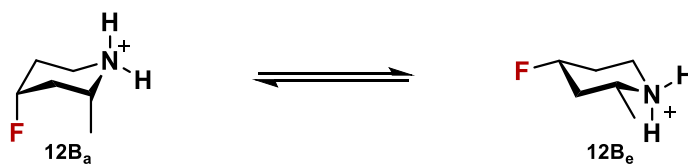

| Solvent               | $\Delta G(\text{a} \rightarrow \text{e})$ | $\Delta E_{\text{elect}}$ | $\Delta E_{\text{hyperc}}$ | $\Delta E_{\text{steric}}$ | $\mu_a$ | $\mu_e$ | Experimental |
|-----------------------|-------------------------------------------|---------------------------|----------------------------|----------------------------|---------|---------|--------------|
| <b>H<sub>2</sub>O</b> | -1.7                                      | +4.7                      | +3.7                       | -9.6                       | 8.4     | 9.2     | equatorial   |
| <b>gas phase</b>      | +0.4                                      | +15.5                     | +1.1                       | -15.8                      | 6.1     | 7.1     | -            |

All values are given in kcal/mol at 298 K.



### *cis*-4-Fluoro-2-methylpiperidine (12C)

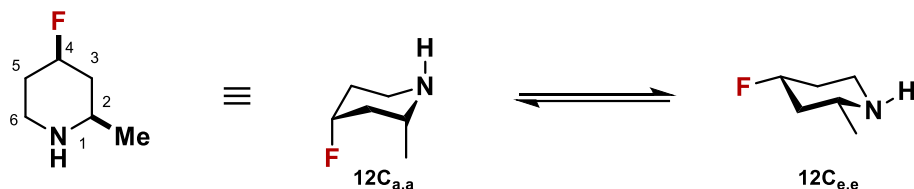

The preparation of this compound is described in the previous section.

#### Experimental observation

In **D<sub>2</sub>O**: The orientation of the fluorine atom was assigned as equatorial due to the small values of  $^3J(\text{F}, \text{H}_a)$ . [ $^3J(\text{3-H}_a, \text{4-F}) = 11.5 \text{ Hz}$ ,  $^3J(\text{5-H}_a, \text{4-F}) = 10.1 \text{ Hz}$ ]

NMR spectra contain mixture of diastereomers originated from the recently reported procedure (*d.r.* 92:8).<sup>1</sup> Only the signals of the major diastereomer are listed.

**<sup>1</sup>H NMR** (600 MHz, D<sub>2</sub>O, 299 K)  $\delta$  4.70 (dm,  $J = 49.1 \text{ Hz}$ , 1H), 3.09 – 3.00 (m, 1H), 2.70 – 2.61 (m, 1H), 2.54 (tm,  $J = 12.8 \text{ Hz}$ , 1H), 2.17 – 2.11 (m, 1H), 2.10 – 2.04 (m, 1H), 1.47 (dm,  $J = 10.1 \text{ Hz}$ , 1H), 1.21 (dm,  $J = 11.5 \text{ Hz}$ , 1H), 1.10 (d,  $J = 6.4 \text{ Hz}$ , 3H); **<sup>1</sup>H{<sup>19</sup>F} NMR** (600 MHz, D<sub>2</sub>O, 299 K)  $\delta$  4.70 (tt,  $J = 10.8, 5.0 \text{ Hz}$ , 1H), 3.05 (ddd,  $J = 13.0, 4.8, 2.7 \text{ Hz}$ , 1H), 2.65 (tdd,  $J = 12.7, 6.3, 2.4 \text{ Hz}$ , 1H), 2.54 (td,  $J = 13.0, 2.7 \text{ Hz}$ , 1H), 2.13 (ddt,  $J = 11.6, 4.7, 2.1 \text{ Hz}$ , 1H), 2.07 (ddt,  $J = 11.7, 4.9, 2.4 \text{ Hz}$ , 1H), 1.47 (qd,  $J = 12.0, 4.7 \text{ Hz}$ , 1H), 1.21 (q,  $J = 11.4 \text{ Hz}$ , 1H), 1.10 (d,  $J = 6.4 \text{ Hz}$ , 3H); **<sup>13</sup>C NMR** (151 MHz, D<sub>2</sub>O, 299 K)  $\delta$  92.02 (d,  $J = 167.0 \text{ Hz}$ ), 49.40 (d,  $J = 12.0 \text{ Hz}$ ), 42.32 (d,  $J = 12.7 \text{ Hz}$ ), 39.88 (d,  $J = 16.0 \text{ Hz}$ ), 31.64 (d,  $J = 17.1 \text{ Hz}$ ), 20.89 (d,  $J = 1.4 \text{ Hz}$ ); **<sup>13</sup>C{sel-<sup>19</sup>F at -166 ppm} NMR** (151 MHz, D<sub>2</sub>O, 299 K)  $\delta$  92.02, 49.40, 42.32, 39.89, 31.64, 20.92; **<sup>19</sup>F NMR** (564 MHz, D<sub>2</sub>O, 299 K)  $\delta$  -166.35 (dm,  $J = 50.0 \text{ Hz}$ ); **<sup>19</sup>F{<sup>1</sup>H} NMR** (564 MHz, D<sub>2</sub>O, 299 K)  $\delta$  -166.35.

### Computational observation

The calculated  $\Delta G$  values in different solvents for the energetically lowest conformers are presented. In the scheme, the values of  $\Delta G$  in water ( $\Delta G$  gas phase) are given.

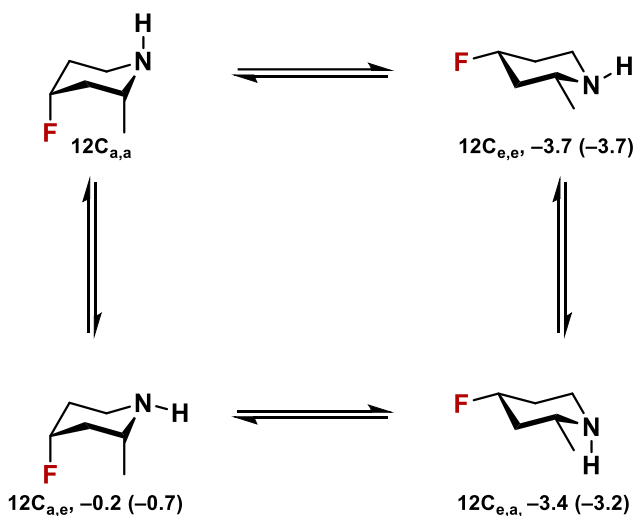

| Solvent               | $\Delta G(a,a \rightarrow e,e)$ | $\Delta E_{\text{elect}}$ | $\Delta E_{\text{hyperc}}$ | $\Delta E_{\text{steric}}$ | $\mu_{a,a}$ | $\mu_{e,e}$ | Experimental |
|-----------------------|---------------------------------|---------------------------|----------------------------|----------------------------|-------------|-------------|--------------|
| <b>H<sub>2</sub>O</b> | -3.7                            | +4.0                      | +3.8                       | -11.1                      | 3.4         | 3.8         | equatorial   |
| <b>gas phase</b>      | -3.7                            | +5.3                      | +2.4                       | -11.1                      | 2.3         | 2.7         | -            |

All values are given in kcal/mol at 298 K.

### 1-(*cis*-3,5-Difluoropiperidin-1-yl)ethan-1-one (13)

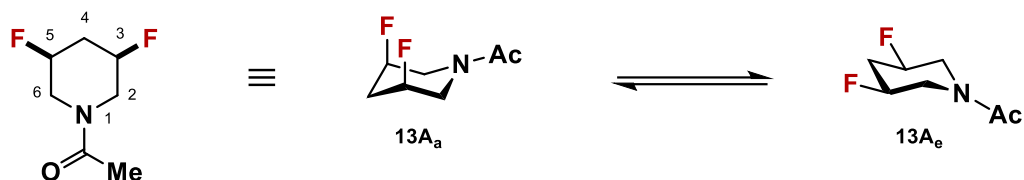

For this particular sample we conducted NMR experiments in different solvents in order to investigate the effect of solvent's dipole moment on the orientation of the fluorine atoms.

The preparation of this compound is described in the previous section.

#### Experimental observation

In  $\text{CDCl}_3$ : The orientation of the fluorine atoms was assigned as axial due to the large values of  $^3J(\text{F}, \text{H}_a)$ . [ $^3J(2\text{-H}_a, 3\text{-F}) = 29.0 \text{ Hz}$ ,  $^3J(6\text{-H}_a, 5\text{-F}) = 29.9 \text{ Hz}$ ,  $^3J(4\text{-H}_a, 3\text{-F}) = 33.5 \text{ Hz}$ ,  $^3J(4\text{-H}_a, 5\text{-F}) = 33.5 \text{ Hz}$ ]

$^1\text{H}$  NMR (600 MHz,  $\text{CDCl}_3$ , 299 K)  $\delta$  4.71 (d,  $J = 46.5 \text{ Hz}$ , 2H), 4.43 – 4.35 (m, 1H), 3.90 – 3.82 (m, 1H), 3.46 (dd,  $J = 29.0, 14.5 \text{ Hz}$ , 1H), 3.27 (dd,  $J = 29.9, 14.3 \text{ Hz}$ , 1H), 2.38 – 2.28 (m, 1H), 2.14 (s, 3H), 2.06 (tdt,  $J = 33.5, 15.0, 3.2 \text{ Hz}$ , 1H overlaps with Me);  $^1\text{H}\{^{19}\text{F}\}$  NMR (600 MHz,  $\text{CDCl}_3$ , 299 K)  $\delta$  4.74 – 4.67 (m, 2H), 4.40 (dm,  $J = 14.2 \text{ Hz}$ , 1H), 3.86 (dd,  $J = 14.4, 4.6 \text{ Hz}$ , 1H), 3.46 (d,  $J = 14.5 \text{ Hz}$ , 1H), 3.27 (d,  $J = 14.2 \text{ Hz}$ , 1H), 2.33 (dm,  $J = 15.0 \text{ Hz}$ , 1H), 2.14 (s, 3H), 2.07 (dt,  $J = 14.9, 3.2 \text{ Hz}$ , 1H);  $^{13}\text{C}$  NMR (151 MHz,  $\text{CDCl}_3$ , 299 K)  $\delta$  170.44, 84.52 (d,  $J = 178.2 \text{ Hz}$ ), 84.36 (d,  $J = 179.5 \text{ Hz}$ ), 49.83 (d,  $J = 23.4 \text{ Hz}$ ), 44.88 (d,  $J = 23.8 \text{ Hz}$ ), 34.44 (t,  $J = 20.9 \text{ Hz}$ ), 21.45;  $^{13}\text{C}\{\text{sel-}^{19}\text{F} \text{ at } -183 \text{ ppm}\}$  NMR (151 MHz,  $\text{CDCl}_3$ , 299 K)  $\delta$  170.44, 84.53, 84.37, 49.83, 44.88, 34.44, 21.45;  $^{19}\text{F}$  NMR (564 MHz,  $\text{CDCl}_3$ , 299 K)  $\delta$  -182.77 – -183.32 (m);  $^{19}\text{F}\{^1\text{H}\}$  NMR (564 MHz,  $\text{CDCl}_3$ , 299 K)  $\delta$  -182.99 (d,  $J = 11.1 \text{ Hz}$ ), -183.10 (d,  $J = 11.1 \text{ Hz}$ ).

**ESI-MS:** calculated  $[\text{C}_7\text{H}_{11}\text{NOF}_2 + \text{Na}]^+$ : 186.0701, found 186.0717.

In  $\text{DMSO}$ : The orientation of the fluorine atoms was assigned as axial due to the large values of  $^3J(\text{F}, \text{H}_a)$ . [ $^3J(2\text{-H}_a, 3\text{-F}) = 36.2 \text{ Hz}$ ,  $^3J(6\text{-H}_a, 5\text{-F}) = 37.5 \text{ Hz}$ ,  $^3J(4\text{-H}_a, 3\text{-F}) = 40.6 \text{ Hz}$ ,  $^3J(4\text{-H}_a, 5\text{-F}) = 40.6 \text{ Hz}$ ]

$^1\text{H}$  NMR (600 MHz,  $\text{DMSO-}d_6$ , 299 K)  $\delta$  4.81 (dm,  $J = 46.7 \text{ Hz}$ , 1H), 4.76 (dm,  $J = 46.5 \text{ Hz}$ , 1H), 4.44 (dddt,  $J = 14.4, 12.4, 3.8, 2.0 \text{ Hz}$ , 1H), 3.96 (dddt,  $J = 15.0, 11.2, 3.8, 2.0 \text{ Hz}$ , 1H), 3.42 (ddd,

$J = 36.2, 14.9, 1.9$  Hz, 1H), 3.01 (ddd,  $J = 37.5, 14.2, 2.1$  Hz, 1H), 2.24 – 2.15 (m, 1H overlaps with 4- $H_a$ ), 2.07 (tdt,  $J = 40.6, 15.6, 3.3$  Hz, 1H overlaps with 4- $H_e$  and Me), 2.01 (s, 3H overlaps with 4- $H_a$ );  $^1H\{^{19}F\}$  NMR (600 MHz, DMSO- $d_6$ , 299 K)  $\delta$  4.83 – 4.79 (m, 1H), 4.78 – 4.75 (m, 1H), 4.44 (ddt,  $J = 14.3, 3.8, 2.0$  Hz, 1H), 3.96 (ddt,  $J = 14.9, 3.9, 2.0$  Hz, 1H), 3.42 (dd,  $J = 14.8, 1.9$  Hz, 1H), 3.01 (dd,  $J = 14.2, 2.0$  Hz, 1H), 2.19 (dtt,  $J = 15.6, 3.5, 2.1$  Hz, 1H), 2.07 (dt,  $J = 15.5, 3.4$  Hz, 1H), 2.01 (s, 3H).

### Computational observation

The calculated  $\Delta G$  is given for the energetically lowest conformers.

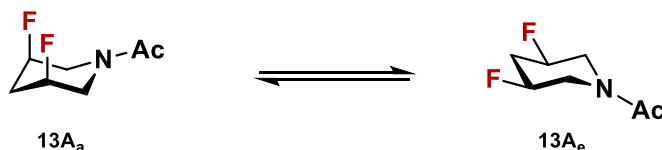

| Solvent                 | $\Delta G(a \rightarrow e)$ | $\Delta E_{\text{elect}}$ | $\Delta E_{\text{hyperc}}$ | $\Delta E_{\text{steric}}$ | $\mu_a$ | $\mu_e$ | Experimental |
|-------------------------|-----------------------------|---------------------------|----------------------------|----------------------------|---------|---------|--------------|
| <b>DMSO</b>             | +1.1                        | +14.7                     | +10.4                      | -23.6                      | +8.9    | +4.2    | axial        |
| <b>CHCl<sub>3</sub></b> | +0.4                        | +18.5                     | +9.7                       | -27.6                      | +8.1    | +3.8    | axial        |
| <b>gas phase</b>        | -1.6                        | +21.1                     | +8.6                       | -30.8                      | 5.8     | 2.8     | -            |

All values are given in kcal/mol at 298 K.

## 1-(*cis*-3,5-Difluoropiperidin-1-yl)-2,2-dimethylpropan-1-one (14)

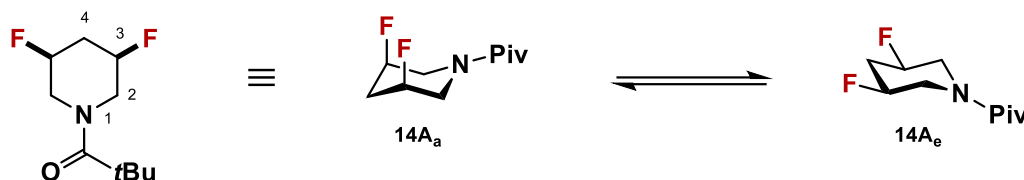

For this particular sample we conducted NMR experiments in deuterated solvents in order to investigate the effect of solvent's dipole moment on the orientation of the fluorine atoms.

The preparation of this compound is described in the previous section.

### Experimental observation

In **CDCl<sub>3</sub>**: The orientation of the fluorine atoms was assigned as equatorial due to the small values of  $^3J(\text{F},\text{H}_a)$ . [ $^3J(2\text{-H}_a,3\text{-F}) = 7.3 \text{ Hz}$ ,  $^3J(4\text{-H}_a,3\text{-F}) = 8.0 \text{ Hz}$ ]

**<sup>1</sup>H NMR** (500 MHz, CDCl<sub>3</sub>, 299 K) δ 4.63 (ddq,  $J = 46.3, 7.0, 3.5 \text{ Hz}$ , 2H), 3.86 (ddd,  $J = 20.7, 13.5, 3.4 \text{ Hz}$ , 2H), 3.75 (dt,  $J = 14.1, 7.3 \text{ Hz}$ , 2H), 2.42 – 2.24 (m, 1H), 2.15 (dm,  $J = 8.0 \text{ Hz}$ , 1H), 1.31 (s, 9H); **<sup>1</sup>H{<sup>19</sup>F} NMR** (500 MHz, CDCl<sub>3</sub>, 299 K) δ 4.63 (tt,  $J = 7.0, 3.8 \text{ Hz}$ , 2H), 3.86 (dm,  $J = 13.6 \text{ Hz}$ , 2H), 3.75 (dd,  $J = 13.7, 6.8 \text{ Hz}$ , 2H), 2.32 (dt,  $J = 13.6, 4.1 \text{ Hz}$ , 1H), 2.15 (dtt,  $J = 13.7, 6.9, 0.9 \text{ Hz}$ , 1H), 1.31 (s, 9H); **<sup>13</sup>C NMR** (126 MHz, CDCl<sub>3</sub>, 299 K) δ 177.74, 84.41 (d,  $J = 180.2 \text{ Hz}$ ), 48.34 (d,  $J = 25.3 \text{ Hz}$ ), 39.15, 35.94 (t,  $J = 20.6 \text{ Hz}$ ), 28.62; **<sup>13</sup>C{sel-<sup>19</sup>F at -183 ppm} NMR** (126 MHz, CDCl<sub>3</sub>, 299 K) δ 177.74, 84.43, 48.34, 39.15, 35.94, 28.62; **<sup>19</sup>F NMR** (470 MHz, CDCl<sub>3</sub>, 299 K) δ -182.32 – -183.44 (m); **<sup>19</sup>F{<sup>1</sup>H} NMR** (470 MHz, CDCl<sub>3</sub>, 299 K) δ -183.11.

**ESI-MS**: calculated [C<sub>10</sub>H<sub>17</sub>NOF<sub>2</sub> + Na]<sup>+</sup>: 228.1170, found 228.1184.

In **DMSO**: The orientation of the fluorine atoms was assigned as axial due to the large values of  $^3J(\text{F},\text{H}_a)$ . [ $^3J(2\text{-H}_a,3\text{-F}) = 34.1 \text{ Hz}$ ,  $^3J(4\text{-H}_a,3\text{-F}) = 38.5 \text{ Hz}$ ]

**<sup>1</sup>H NMR** (600 MHz, DMSO-*d*<sub>6</sub>, 299 K) δ 4.79 (dq,  $J = 46.6, 3.8, 1.9 \text{ Hz}$ , 2H), 4.38 – 4.30 (m, 2H), 3.27 (dd,  $J = 34.1, 14.0 \text{ Hz}$ , 2H), 2.19 – 2.15 (m, 1H overlaps with 4-H<sub>a</sub>), 2.07 (tdt,  $J = 38.5, 15.3, 3.5 \text{ Hz}$ , 1H overlaps with 4-H<sub>e</sub>), 1.21 (s, 9H); **<sup>1</sup>H{<sup>19</sup>F} NMR** (600 MHz, DMSO-*d*<sub>6</sub>, 299 K) δ 4.82 – 4.76 (m, 2H), 4.34 (dm,  $J = 14.9 \text{ Hz}$ , 2H), 3.27 (d,  $J = 14.4 \text{ Hz}$ , 2H), 2.17 (dtt,  $J = 15.2, 3.7, 1.8 \text{ Hz}$ , 1H), 2.10 (dt,  $J = 15.3, 3.7 \text{ Hz}$ , 1H), 1.21 (s, 9H).

### Computational observation

The calculated  $\Delta G$  is given for the energetically lowest conformers.

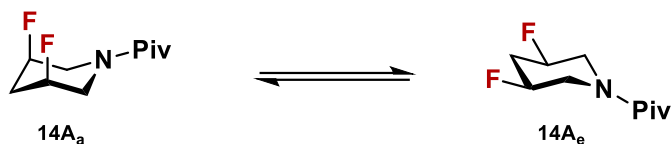

| Solvent                 | $\Delta G(a \rightarrow e)$ | $\Delta E_{\text{elect}}$ | $\Delta E_{\text{hyperc}}$ | $\Delta E_{\text{steric}}$ | $\mu_a$ | $\mu_e$ | Experimental |
|-------------------------|-----------------------------|---------------------------|----------------------------|----------------------------|---------|---------|--------------|
| <b>DMSO</b>             | +0.5                        | +23.6                     | +11.6                      | -34.5                      | 8.4     | 4.2     | axial        |
| <b>CHCl<sub>3</sub></b> | -1.0                        | +17.2                     | +11.8                      | -29.2                      | 7.6     | 3.8     | equatorial   |
| <b>gas phase</b>        | -2.3                        | +7.6                      | +13.4                      | -23.2                      | 5.2     | 2.8     | -            |

All values are given in kcal/mol at 298 K.

**tert-Butyl cis-3,5-difluoropiperidine-1-carboxylate (15)**

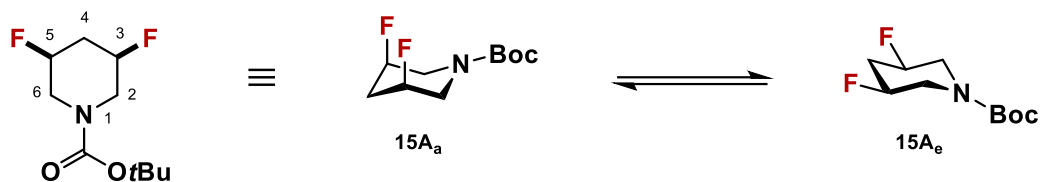

For this particular sample we conducted several computations and NMR experiments in different solvents in order to investigate the effect of solvent's dipole moment on the orientation of the fluorine atoms.

This compound was prepared following a recent literature procedure.<sup>1</sup>

Experimental observation

Broadening in NMR spectra was observed due to the dynamic behavior of the Boc group.

In **CDCl<sub>3</sub>**: The orientation of the fluorine atoms was assigned as equatorial due to the small values of  $^3J(\text{F},\text{H}_a)$ . [ $^3J(4\text{-H}_a,3\text{-F}) = 12.5 \text{ Hz}$ ,  $^3J(4\text{-H}_a,5\text{-F}) = 12.5 \text{ Hz}$ ]

**<sup>1</sup>H NMR** (600 MHz, CDCl<sub>3</sub>, 299 K)  $\delta$  4.61 (d,  $J = 46.8 \text{ Hz}$ , 2H), 3.71 – 3.54 (m, 4H), 2.21 (tdt,  $J = 25.2, 13.8, 4.1 \text{ Hz}$ , 1H overlaps with 4-H<sub>a</sub>), 2.12 (dm,  $J = 12.5 \text{ Hz}$ , 1H overlaps with 4-H<sub>e</sub>), 1.46 (s, 9H); **<sup>1</sup>H{<sup>19</sup>F} NMR** (600 MHz, CDCl<sub>3</sub>, 299 K)  $\delta$  4.61 (s, 2H), 3.65 – 3.56 (m, 4H), 2.21 (dt,  $J = 13.9, 4.0 \text{ Hz}$ , 1H), 2.12 (dt,  $J = 13.4, 6.6 \text{ Hz}$ , 1H), 1.46 (s, 9H); **<sup>13</sup>C NMR** (151 MHz, CDCl<sub>3</sub>, 299 K)  $\delta$  154.99, 84.37 (d,  $J = 173.0 \text{ Hz}$ ), 80.75, 47.78 (bs), 46.70 (bs), 35.51 (t,  $J = 20.6 \text{ Hz}$ ), 28.42; **<sup>13</sup>C{sel-<sup>19</sup>F at -183 ppm} NMR** (151 MHz, CDCl<sub>3</sub>, 299 K)  $\delta$  154.98, 84.37, 80.74, 47.69 (bs), 46.60 (bs), 35.51, 28.42; **<sup>19</sup>F NMR** (564 MHz, CDCl<sub>3</sub>, 299 K)  $\delta$  -183.37 (bs); **<sup>19</sup>F{<sup>1</sup>H} NMR** (564 MHz, CDCl<sub>3</sub>, 299 K)  $\delta$  -183.36 (bs).

**ESI-MS**: calculated [C<sub>10</sub>H<sub>17</sub>NO<sub>2</sub>F<sub>2</sub> + Na]<sup>+</sup>: 244.1125, found 244.1125.

In **DMSO**: The orientation of the fluorine atoms was assigned as axial due to the large values of  $^3J(\text{F},\text{H}_a)$ . [ $^3J(2\text{-H}_a,3\text{-F}) = 33.8 \text{ Hz}$ ,  $^3J(4\text{-H}_a,3\text{-F}) = 40.4 \text{ Hz}$ ,  $^3J(4\text{-H}_a,5\text{-F}) = 40.4 \text{ Hz}$ ,  $^3J(6\text{-H}_a,5\text{-F}) = 33.8 \text{ Hz}$ ]

**<sup>1</sup>H NMR** (600 MHz, DMSO-*d*<sub>6</sub>, 299 K)  $\delta$  4.74 (d,  $J = 46.7 \text{ Hz}$ , 2H), 4.04 (bs, 2H), 3.15 (tm,  $J = 33.8 \text{ Hz}$ , 2H), 2.16 (ddddt,  $J = 15.9, 12.3, 10.2, 3.7, 1.7 \text{ Hz}$ , 1H), 2.02 (tdt,  $J = 40.4, 15.5, 3.4 \text{ Hz}$ ,

1H), 1.40 (s, 9H);  $^1\text{H}\{^{19}\text{F}\}$  NMR (600 MHz, DMSO- $d_6$ , 299 K)  $\delta$  4.74 (s, 2H), 4.04 (bs, 2H), 3.26 – 3.03 (m, 2H), 2.16 (dtt,  $J = 15.5, 3.8, 2.0$  Hz, 1H), 2.02 (dt,  $J = 15.6, 3.5$  Hz, 1H), 1.40 (s, 9H).

### Computational observation

The calculated  $\Delta G$  is given for the energetically lowest conformers.

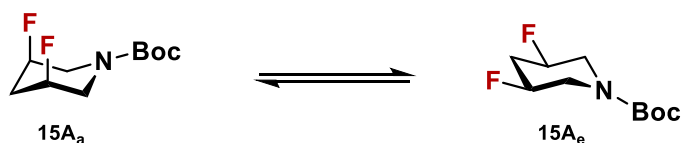

| Solvent                           | $\Delta G(a \rightarrow e)$ | $\Delta E_{\text{elect}}$ | $\Delta E_{\text{hyperc}}$ | $\Delta E_{\text{steric}}$ | $\mu_a$ | $\mu_e$ | Experimental |
|-----------------------------------|-----------------------------|---------------------------|----------------------------|----------------------------|---------|---------|--------------|
| <b>DMSO</b>                       | +0.7                        | +30.4                     | +12.9                      | -42.5                      | 6.5     | 3.3     | axial        |
| <b><math>\text{CHCl}_3</math></b> | -1.0                        | +30.0                     | +12.8                      | -42.7                      | 5.9     | 3.1     | equatorial   |
| <b>gas phase</b>                  | -2.4                        | +36.9                     | +12.4                      | -51.3                      | 4.2     | 2.4     | -            |

All values are given in kcal/mol at 298 K.



### 1-(4-Methylpiperidin-1-yl)-2,2,2-trifluoroethan-1-one (16)

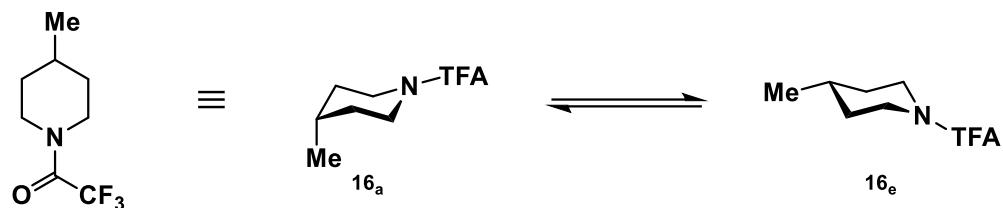

#### Computational observation

The calculated  $\Delta G$  is given for the energetically lowest conformers.

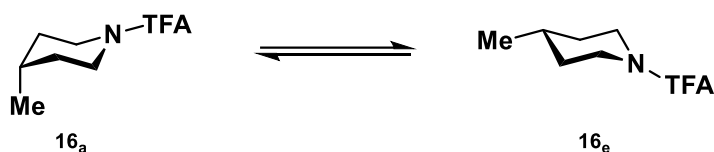

| Solvent                             | $\Delta G(a \rightarrow e)$ | $\Delta E_{\text{elect}}$ | $\Delta E_{\text{hyperc}}$ | $\Delta E_{\text{steric}}$ | $\mu_{a,a}$ | $\mu_{e,e}$ | Experimental |
|-------------------------------------|-----------------------------|---------------------------|----------------------------|----------------------------|-------------|-------------|--------------|
| <b>DMSO</b>                         | -2.0                        | +4.7                      | -0.9                       | -5.4                       | 6.8         | 6.8         | -            |
| <b>H<sub>2</sub>O</b>               | -1.9                        | +4.7                      | -0.9                       | -5.4                       | 6.8         | 6.8         | -            |
| <b>CH<sub>2</sub>Cl<sub>2</sub></b> | -1.8                        | +4.3                      | -1.0                       | -5.0                       | 6.5         | 6.5         | -            |
| <b>CHCl<sub>3</sub></b>             | -1.9                        | +1.8                      | -0.9                       | -2.6                       | 6.3         | 6.3         | -            |
| <b>C<sub>6</sub>H<sub>6</sub></b>   | -2.0                        | +3.8                      | -1.1                       | -4.5                       | 5.8         | 5.8         | -            |
| <b>gas phase</b>                    | -2.0                        | +0.6                      | -1.1                       | -1.2                       | 4.9         | 4.8         | -            |

All values are given in kcal/mol at 298 K.

1-(*cis*-3,5-Difluoro-*trans*-4-methylpiperidin-1-yl)-2,2,2-trifluoroethan-1-one (17)

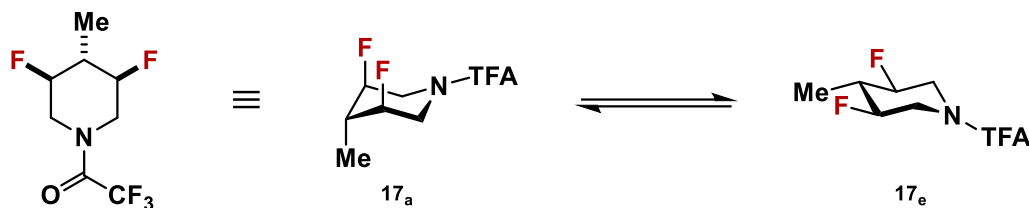

Computational observation

The calculated  $\Delta G$  is given for the energetically lowest conformers.

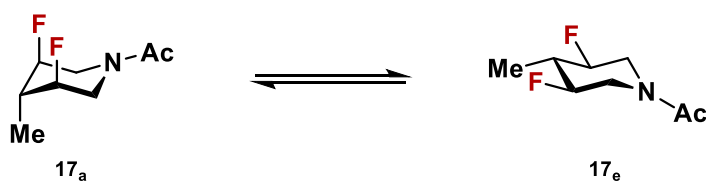

| Solvent                             | $\Delta G(a \rightarrow e)$ | $\Delta E_{\text{elect}}$ | $\Delta E_{\text{hyperc}}$ | $\Delta E_{\text{steric}}$ | $\mu_{a,a}$ | $\mu_{e,e}$ | Experimental |
|-------------------------------------|-----------------------------|---------------------------|----------------------------|----------------------------|-------------|-------------|--------------|
| <b>DMSO</b>                         | +0.5                        | +2.7                      | +9.1                       | -11.2                      | 9.8         | 3.5         | -            |
| <b>H<sub>2</sub>O</b>               | +0.6                        | +2.7                      | +9.1                       | -11.3                      | 9.9         | 3.5         | -            |
| <b>CH<sub>2</sub>Cl<sub>2</sub></b> | -0.0                        | +0.6                      | +8.9                       | -9.4                       | 9.5         | 3.4         | -            |
| <b>CHCl<sub>3</sub></b>             | -0.4                        | +0.5                      | +8.8                       | -9.6                       | 9.1         | 3.2         | -            |
| <b>C<sub>6</sub>H<sub>6</sub></b>   | -2.0                        | -0.7                      | +8.6                       | -9.1                       | 8.2         | 2.9         | -            |
| <b>gas phase</b>                    | -2.9                        | +3.8                      | +8.6                       | -15.1                      | 6.7         | 2.4         | -            |

All values are given in kcal/mol at 298 K.

## References

1. Z. Nairoukh, M. Wollenburg, C. Schlepphorst, K. Bergander, F. Glorius, *Nat. Chem.* **2019**, *11*, 264.
2. a) F. Neese, *WIREs Comput. Mol. Sci.* **2012**, *2*, 73. b) F. Neese, *WIREs Comput. Mol. Sci.* **2018**, *8*, e1327.
3. Jmol: an open-source Java viewer for chemical structures in 3D. <http://www.jmol.org/>.
4. Y. Zhao, D. G. Truhlar, *Theor. Chem. Acc.* **2008**, *120*, 215.
5. F. Weigend, R. Ahlrichs, *Phys. Chem. Chem. Phys.* **2005**, *7*, 3297.
6. a) V. Barone, M. Cossi, *J. Phys. Chem. A* **1998**, *102*, 1995. b) M. Cossi, N. Rega, G. Scalmani, V. Barone, *J. Comput. Chem.* **2003**, *24*, 669.
7. E. D. Glendening, A. E. Reed, J. E. Carpenter, F. Weinhold, *NBO Version 3.1*.

## Computational Data

| Comp. No. | Solvent         | Electronic Energy [E <sub>h</sub> ] | ZPVE [E <sub>h</sub> ] | Thermal Correction [E <sub>h</sub> ] | Enthalpy Correction [E <sub>h</sub> ] | Entropy Correction [E <sub>h</sub> ] |
|-----------|-----------------|-------------------------------------|------------------------|--------------------------------------|---------------------------------------|--------------------------------------|
| 1A_a      | Gas Phase       | -801.6259459                        | 0.1689493              | 0.01133137                           | 0.00094421                            | -0.04919698                          |
| 1A_a      | Toluene         | -801.634133                         | 0.16864346             | 0.01132307                           | 0.00094421                            | -0.04913137                          |
| 1A_e      | Gas Phase       | -801.6263801                        | 0.16880073             | 0.01140211                           | 0.00094421                            | -0.04938804                          |
| 1A_e      | Toluene         | -801.6338477                        | 0.16851314             | 0.01140735                           | 0.00094421                            | -0.04938029                          |
| 1B_a      | Gas Phase       | -351.530378                         | 0.16835041             | 0.00624385                           | 0.00094421                            | -0.03711602                          |
| 1B_a      | Water           | -351.6326598                        | 0.1682198              | 0.00631765                           | 0.00094421                            | -0.03732519                          |
| 1B_e      | Gas Phase       | -351.5221225                        | 0.16801694             | 0.00635132                           | 0.00094421                            | -0.03742287                          |
| 1B_e      | Water           | -351.6295947                        | 0.16811267             | 0.00635205                           | 0.00094421                            | -0.03743271                          |
| 1C_ae     | Gas Phase       | -351.1597787                        | 0.15296809             | 0.00622141                           | 0.00094421                            | -0.03708196                          |
| 1C_ae     | Water           | -351.1704709                        | 0.15269654             | 0.00619851                           | 0.00094421                            | -0.03702969                          |
| 1C_aa     | Gas Phase       | -351.1619248                        | 0.15313089             | 0.00621352                           | 0.00094421                            | -0.0370766                           |
| 1C_aa     | Water           | -351.1708822                        | 0.15271469             | 0.00624126                           | 0.00094421                            | -0.03713985                          |
| 1C_ee     | Gas Phase       | -351.1618747                        | 0.15305333             | 0.00622065                           | 0.00094421                            | -0.03710172                          |
| 1C_ee     | Water           | -351.1706597                        | 0.1526886              | 0.00621756                           | 0.00094421                            | -0.03709072                          |
| 1C_ea     | Gas Phase       | -351.1605979                        | 0.1529366              | 0.00626151                           | 0.00094421                            | -0.03719315                          |
| 1C_ea     | Water           | -351.1703391                        | 0.15271284             | 0.00626188                           | 0.00094421                            | -0.03719523                          |
| 2A_a      | Gas Phase       | -900.8816604                        | 0.16101833             | 0.01211917                           | 0.00094421                            | -0.05100981                          |
| 2A_a      | Benzene         | -900.892217                         | 0.16080437             | 0.01211744                           | 0.00094421                            | -0.0509751                           |
| 2A_a      | Dichloromethane | -900.9003424                        | 0.16047975             | 0.01129392                           | 0.00094421                            | -0.04922862                          |
| 2A_a      | Chloroform      | -900.8978157                        | 0.16066426             | 0.01212913                           | 0.00094421                            | -0.05099004                          |
| 2A_a      | DMSO            | -900.9029415                        | 0.16055378             | 0.01212662                           | 0.00094421                            | -0.05096904                          |
| 2A_a      | Water           | -900.9032053                        | 0.16053968             | 0.01212936                           | 0.00094421                            | -0.0509735                           |
| 2A_e      | Gas Phase       | -900.8836352                        | 0.16096724             | 0.01222411                           | 0.00094421                            | -0.05132188                          |
| 2A_e      | Benzene         | -900.8919635                        | 0.16070132             | 0.0122501                            | 0.00094421                            | -0.05139424                          |
| 2A_e      | Dichloromethane | -900.8977977                        | 0.16060495             | 0.01222449                           | 0.00094421                            | -0.05128684                          |
| 2A_e      | Chloroform      | -900.8960406                        | 0.1606235              | 0.0122435                            | 0.00094421                            | -0.05134876                          |
| 2A_e      | DMSO            | -900.8995407                        | 0.16053115             | 0.01223756                           | 0.00094421                            | -0.05131627                          |
| 2A_e      | Water           | -900.8997162                        | 0.16052755             | 0.01223589                           | 0.00094421                            | -0.05131139                          |

| Comp. No. | Solvent         | Electronic Energy [E <sub>h</sub> ] | ZPVE [E <sub>h</sub> ] | Thermal Correction [E <sub>h</sub> ] | Enthalpy Correction [E <sub>h</sub> ] | Entropy Correction [E <sub>h</sub> ] |
|-----------|-----------------|-------------------------------------|------------------------|--------------------------------------|---------------------------------------|--------------------------------------|
| 2C_ee     | Gas Phase       | -450.4222648                        | 0.14542198             | 0.00696804                           | 0.00094421                            | -0.03917046                          |
| 2C_ee     | Benzene         | -450.4283847                        | 0.14527285             | 0.00695724                           | 0.00094421                            | -0.03913491                          |
| 2C_ee     | Dichloromethane | -450.432526                         | 0.1451169              | 0.00698024                           | 0.00094421                            | -0.03919794                          |
| 2C_ee     | Chloroform      | -450.4313016                        | 0.14517539             | 0.00697341                           | 0.00094421                            | -0.03918554                          |
| 2C_ee     | DMSO            | -450.4337225                        | 0.14508166             | 0.0069824                            | 0.00094421                            | -0.03919916                          |
| 2C_ee     | Water           | -450.433842                         | 0.14508354             | 0.00698135                           | 0.00094421                            | -0.03919725                          |
| 2C_ea     | Gas Phase       | -450.4209177                        | 0.14523881             | 0.00703444                           | 0.00094421                            | -0.03931768                          |
| 2C_ea     | Benzene         | -450.4275901                        | 0.14519336             | 0.0070261                            | 0.00094421                            | -0.03930381                          |
| 2C_ea     | Dichloromethane | -450.4321603                        | 0.14515023             | 0.00702779                           | 0.00094421                            | -0.03930885                          |
| 2C_ea     | Chloroform      | -450.4307934                        | 0.1451697              | 0.00702407                           | 0.00094421                            | -0.03929919                          |
| 2C_ea     | DMSO            | -450.4335054                        | 0.14521798             | 0.00701602                           | 0.00094421                            | -0.0392816                           |
| 2C_ea     | Water           | -450.4336407                        | 0.14522606             | 0.00701737                           | 0.00094421                            | -0.03928451                          |
| 2C_ae     | Gas Phase       | -450.4167679                        | 0.14513902             | 0.00697708                           | 0.00094421                            | -0.03910142                          |
| 2C_ae     | Benzene         | -450.4252986                        | 0.14509296             | 0.00694825                           | 0.00094421                            | -0.03903571                          |
| 2C_ae     | Dichloromethane | -450.4317693                        | 0.14505474             | 0.00693099                           | 0.00094421                            | -0.03899219                          |
| 2C_ae     | Chloroform      | -450.42977                          | 0.14506082             | 0.00693872                           | 0.00094421                            | -0.03901428                          |
| 2C_ae     | DMSO            | -450.4337855                        | 0.14506134             | 0.0069274                            | 0.00094421                            | -0.03898338                          |
| 2C_ae     | Water           | -450.4339923                        | 0.14507976             | 0.00692276                           | 0.00094421                            | -0.03897331                          |
| 2C_aa     | Gas Phase       | -450.4218862                        | 0.14546089             | 0.00694339                           | 0.00094421                            | -0.03906333                          |
| 2C_aa     | Benzene         | -450.4287983                        | 0.14529905             | 0.00695349                           | 0.00094421                            | -0.03907755                          |
| 2C_aa     | Dichloromethane | -450.4336555                        | 0.14519819             | 0.00695935                           | 0.00094421                            | -0.03908468                          |
| 2C_aa     | Chloroform      | -450.432188                         | 0.14522116             | 0.00695957                           | 0.00094421                            | -0.03908697                          |
| 2C_aa     | DMSO            | -450.4351093                        | 0.14516262             | 0.00696186                           | 0.00094421                            | -0.03908754                          |
| 2C_aa     | Water           | -450.435256                         | 0.14515752             | 0.00696235                           | 0.00094421                            | -0.03908844                          |
| 3A_a      | Gas Phase       | -840.9398689                        | 0.19700024             | 0.0128136                            | 0.00094421                            | -0.05224187                          |
| 3A_a      | Chloroform      | -840.9516605                        | 0.19653986             | 0.01282299                           | 0.00094421                            | -0.05222229                          |
| 3A_e      | Gas Phase       | -840.9373161                        | 0.19726744             | 0.01279345                           | 0.00094421                            | -0.05222211                          |
| 3A_e      | Chloroform      | -840.9481592                        | 0.19676352             | 0.01281713                           | 0.00094421                            | -0.05223844                          |
| 3B_a      | Gas Phase       | -390.8453896                        | 0.19638613             | 0.00769226                           | 0.00094421                            | -0.04024415                          |
| 3B_a      | Water           | -390.9460341                        | 0.19626065             | 0.00774314                           | 0.00094421                            | -0.04039481                          |

| Comp. No. | Solvent    | Electronic Energy [E <sub>h</sub> ] | ZPVE [E <sub>h</sub> ] | Thermal Correction [E <sub>h</sub> ] | Enthalpy Correction [E <sub>h</sub> ] | Entropy Correction [E <sub>h</sub> ] |
|-----------|------------|-------------------------------------|------------------------|--------------------------------------|---------------------------------------|--------------------------------------|
| 3B_e      | Gas Phase  | -390.8354585                        | 0.19641687             | 0.00770118                           | 0.00094421                            | -0.04028583                          |
| 3B_e      | Water      | -390.9406814                        | 0.19661467             | 0.00767359                           | 0.00094421                            | -0.04023764                          |
| 3C_ae     | Gas Phase  | -390.473243                         | 0.18102694             | 0.00766429                           | 0.00094421                            | -0.04019317                          |
| 3C_ae     | Water      | -390.4838329                        | 0.18069321             | 0.00764032                           | 0.00094421                            | -0.04013868                          |
| 3C_aa     | Gas Phase  | -390.4756426                        | 0.18122548             | 0.00764256                           | 0.00094421                            | -0.04016537                          |
| 3C_aa     | Water      | -390.4844915                        | 0.18081529             | 0.00765648                           | 0.00094421                            | -0.04019514                          |
| 3C_ee     | Gas Phase  | -390.4726544                        | 0.1814969              | 0.00759222                           | 0.00094421                            | -0.04003724                          |
| 3C_ee     | Water      | -390.4813313                        | 0.1810497              | 0.00757865                           | 0.00094421                            | -0.03999378                          |
| 3C_ea     | Gas Phase  | -390.4715489                        | 0.18140172             | 0.00761779                           | 0.00094421                            | -0.04008927                          |
| 3C_ea     | Water      | -390.4810823                        | 0.18105404             | 0.00761586                           | 0.00094421                            | -0.04008262                          |
| 4A_a      | Gas Phase  | -840.9380827                        | 0.19724179             | 0.01264227                           | 0.00094421                            | -0.05166772                          |
| 4A_a      | Chloroform | -840.9499255                        | 0.19678333             | 0.01263207                           | 0.00094421                            | -0.05162098                          |
| 4A_e      | Gas Phase  | -840.9399186                        | 0.19683157             | 0.01289392                           | 0.00094421                            | -0.05241024                          |
| 4A_e      | Chloroform | -840.9508543                        | 0.19638561             | 0.0129133                            | 0.00094421                            | -0.05243683                          |
| 4B_a      | Gas Phase  | -390.8426546                        | 0.19648425             | 0.00763904                           | 0.00094421                            | -0.04013884                          |
| 4B_a      | Water      | -390.9429668                        | 0.196368               | 0.00766209                           | 0.00094421                            | -0.04021186                          |
| 4B_e      | Gas Phase  | -390.8373315                        | 0.19610864             | 0.00778239                           | 0.00094421                            | -0.04058233                          |
| 4B_e      | Water      | -390.9430543                        | 0.19614016             | 0.00779374                           | 0.00094421                            | -0.04062399                          |
| 4C_ae     | Gas Phase  | -390.4714529                        | 0.18128362             | 0.00754708                           | 0.00094421                            | -0.03992141                          |
| 4C_ae     | Water      | -390.480976                         | 0.18071351             | 0.00758811                           | 0.00094421                            | -0.04002575                          |
| 4C_aa     | Gas Phase  | -390.4731709                        | 0.18141371             | 0.0075465                            | 0.00094421                            | -0.03993877                          |
| 4C_aa     | Water      | -390.4819939                        | 0.18107617             | 0.00750854                           | 0.00094421                            | -0.03983668                          |
| 4C_ee     | Gas Phase  | -390.4755312                        | 0.18104879             | 0.00765437                           | 0.00094421                            | -0.04026993                          |
| 4C_ee     | Water      | -390.4844743                        | 0.18059586             | 0.00765259                           | 0.00094421                            | -0.04026001                          |
| 4C_ea     | Gas Phase  | -390.474424                         | 0.18094129             | 0.00770719                           | 0.00094421                            | -0.04039216                          |
| 4C_ea     | Water      | -390.4843432                        | 0.18061678             | 0.00770578                           | 0.00094421                            | -0.04038857                          |
| 5A_a      | Gas Phase  | -840.9331314                        | 0.19744122             | 0.01254499                           | 0.00094421                            | -0.05139452                          |
| 5A_a      | Chloroform | -840.9447066                        | 0.19690447             | 0.01258967                           | 0.00094421                            | -0.05148371                          |
| 5A_e      | Gas Phase  | -840.9391887                        | 0.19713343             | 0.01281675                           | 0.00094421                            | -0.05212767                          |
| 5A_e      | Chloroform | -840.9500709                        | 0.19671024             | 0.01279687                           | 0.00094421                            | -0.05209453                          |

| Comp. No. | Solvent    | Electronic Energy [E <sub>h</sub> ] | ZPVE [E <sub>h</sub> ] | Thermal Correction [E <sub>h</sub> ] | Enthalpy Correction [E <sub>h</sub> ] | Entropy Correction [E <sub>h</sub> ] |
|-----------|------------|-------------------------------------|------------------------|--------------------------------------|---------------------------------------|--------------------------------------|
| 5B_a      | Gas Phase  | -390.8499078                        | 0.19629763             | 0.00767043                           | 0.00094421                            | -0.04016662                          |
| 5B_a      | Water      | -390.9473783                        | 0.19621357             | 0.00775075                           | 0.00094421                            | -0.04038723                          |
| 5B_e      | Gas Phase  | -390.8400293                        | 0.19632459             | 0.00768476                           | 0.00094421                            | -0.04023                             |
| 5B_e      | Water      | -390.9427392                        | 0.19660802             | 0.00756538                           | 0.00094421                            | -0.03994581                          |
| 5C_ae     | Gas Phase  | -390.4756708                        | 0.18101751             | 0.00763667                           | 0.00094421                            | -0.04012766                          |
| 5C_ae     | Water      | -390.485658                         | 0.18059096             | 0.00763065                           | 0.00094421                            | -0.04011088                          |
| 5C_aa     | Gas Phase  | -390.4771249                        | 0.18114373             | 0.00765618                           | 0.00094421                            | -0.04018013                          |
| 5C_aa     | Water      | -390.4858376                        | 0.18066476             | 0.00766511                           | 0.00094421                            | -0.04019251                          |
| 5C_ee     | Gas Phase  | -390.4742597                        | 0.18133165             | 0.00760285                           | 0.00094421                            | -0.04003301                          |
| 5C_ee     | Water      | -390.482848                         | 0.18086963             | 0.007604                             | 0.00094421                            | -0.04003428                          |
| 5C_ea     | Gas Phase  | -390.4733895                        | 0.18135162             | 0.00760698                           | 0.00094421                            | -0.04005578                          |
| 5C_ea     | Water      | -390.4828226                        | 0.18094322             | 0.00761845                           | 0.00094421                            | -0.04008603                          |
| 6A_a      | Gas Phase  | -840.9338674                        | 0.19712694             | 0.01257976                           | 0.00094421                            | -0.05145692                          |
| 6A_a      | Chloroform | -840.9451703                        | 0.19665764             | 0.01259902                           | 0.00094421                            | -0.05148391                          |
| 6A_e      | Gas Phase  | -840.93929                          | 0.19707249             | 0.0128277                            | 0.00094421                            | -0.05219499                          |
| 6A_e      | Chloroform | -840.9500191                        | 0.19663466             | 0.01281918                           | 0.00094421                            | -0.05214099                          |
| 6B_a      | Gas Phase  | -390.8498803                        | 0.19617696             | 0.00765589                           | 0.00094421                            | -0.04018899                          |
| 6B_a      | Water      | -390.9478147                        | 0.19586991             | 0.0077484                            | 0.00094421                            | -0.04043313                          |
| 6B_e      | Gas Phase  | -390.8391004                        | 0.19624634             | 0.00769377                           | 0.00094421                            | -0.04029724                          |
| 6B_e      | Water      | -390.9426872                        | 0.19626881             | 0.00769224                           | 0.00094421                            | -0.04030439                          |
| 6C_ae     | Gas Phase  | -390.4758832                        | 0.18091855             | 0.00762295                           | 0.00094421                            | -0.04014556                          |
| 6C_ae     | Water      | -390.4866601                        | 0.18062266             | 0.00755101                           | 0.00094421                            | -0.03996809                          |
| 6C_aa     | Gas Phase  | -390.4777825                        | 0.18104477             | 0.00762234                           | 0.00094421                            | -0.04015211                          |
| 6C_aa     | Water      | -390.4867059                        | 0.18063117             | 0.00763115                           | 0.00094421                            | -0.04017193                          |
| 6C_ee     | Gas Phase  | -390.474037                         | 0.18124917             | 0.00760484                           | 0.00094421                            | -0.04009064                          |
| 6C_ee     | Water      | -390.4827291                        | 0.18082888             | 0.00759912                           | 0.00094421                            | -0.04007788                          |
| 6C_ea     | Gas Phase  | -390.4732172                        | 0.18126088             | 0.00760814                           | 0.00094421                            | -0.04011021                          |
| 6C_ea     | Water      | -390.4830227                        | 0.1808648              | 0.00762354                           | 0.00094421                            | -0.04015494                          |
| 7A_a      | Gas Phase  | -1138.728248                        | 0.1741844              | 0.01455138                           | 0.00094421                            | -0.05608935                          |
| 7A_a      | Chloroform | -1138.742016                        | 0.17371648             | 0.01456243                           | 0.00094421                            | -0.05609464                          |

| Comp. No. | Solvent    | Electronic Energy [E <sub>h</sub> ] | ZPVE [E <sub>h</sub> ] | Thermal Correction [E <sub>h</sub> ] | Enthalpy Correction [E <sub>h</sub> ] | Entropy Correction [E <sub>h</sub> ] |
|-----------|------------|-------------------------------------|------------------------|--------------------------------------|---------------------------------------|--------------------------------------|
| 7A_e      | Gas Phase  | -1138.737738                        | 0.17442237             | 0.01474117                           | 0.00094421                            | -0.05662169                          |
| 7A_e      | Chloroform | -1138.748694                        | 0.17381775             | 0.01480929                           | 0.00094421                            | -0.05676251                          |
| 7B_a      | Gas Phase  | -688.6338359                        | 0.17345359             | 0.00957155                           | 0.00094421                            | -0.0452195                           |
| 7B_a      | Water      | -688.7390937                        | 0.17305183             | 0.00977784                           | 0.00094421                            | -0.04577268                          |
| 7B_e      | Gas Phase  | -688.6215475                        | 0.17339225             | 0.00959307                           | 0.00094421                            | -0.04514972                          |
| 7B_e      | Water      | -688.7320217                        | 0.17380057             | 0.0095458                            | 0.00094421                            | -0.04507791                          |
| 7C_ae     | Gas Phase  | -688.2796547                        | 0.1585795              | 0.00951651                           | 0.00094421                            | -0.04513425                          |
| 7C_ae     | Water      | -688.2929145                        | 0.1581745              | 0.00951731                           | 0.00094421                            | -0.04512443                          |
| 7C_aa     | Gas Phase  | -688.2813934                        | 0.15868262             | 0.00949823                           | 0.00094421                            | -0.04510205                          |
| 7C_aa     | Water      | -688.2931305                        | 0.15815529             | 0.009526                             | 0.00094421                            | -0.04515787                          |
| 7C_ee     | Gas Phase  | -688.279636                         | 0.15889365             | 0.00950529                           | 0.00094421                            | -0.04498004                          |
| 7C_ee     | Water      | -688.2899473                        | 0.15823823             | 0.00954003                           | 0.00094421                            | -0.0450408                           |
| 7C_ea     | Gas Phase  | -688.2762702                        | 0.15869289             | 0.00955005                           | 0.00094421                            | -0.04505896                          |
| 7C_ea     | Water      | -688.2891518                        | 0.15828512             | 0.00954313                           | 0.00094421                            | -0.04504776                          |
| 8A_a      | Gas Phase  | -880.2507371                        | 0.22539288             | 0.01411982                           | 0.00094421                            | -0.05460079                          |
| 8A_a      | Chloroform | -880.2623052                        | 0.22488707             | 0.01412995                           | 0.00094421                            | -0.05462755                          |
| 8A_e      | Gas Phase  | -880.2502769                        | 0.22545207             | 0.01420171                           | 0.00094421                            | -0.0549507                           |
| 8A_e      | Chloroform | -880.2610386                        | 0.22490327             | 0.01422352                           | 0.00094421                            | -0.05497025                          |
| 8B_a      | Gas Phase  | -430.1567416                        | 0.22480191             | 0.0089966                            | 0.00094421                            | -0.04294869                          |
| 8B_a      | Water      | -430.2552905                        | 0.22463158             | 0.00906713                           | 0.00094421                            | -0.04313992                          |
| 8B_e      | Gas Phase  | -430.149895                         | 0.22473285             | 0.00904227                           | 0.00094421                            | -0.04309384                          |
| 8B_e      | Water      | -430.2535374                        | 0.22474703             | 0.00907088                           | 0.00094421                            | -0.04318461                          |
| 8C_ae     | Gas Phase  | -429.7840955                        | 0.20952604             | 0.00894273                           | 0.00094421                            | -0.04281757                          |
| 8C_ae     | Water      | -429.7935556                        | 0.20901332             | 0.00897776                           | 0.00094421                            | -0.04290965                          |
| 8C_aa     | Gas Phase  | -429.7859444                        | 0.20969246             | 0.00892838                           | 0.00094421                            | -0.04281282                          |
| 8C_aa     | Water      | -429.7945978                        | 0.20920188             | 0.00894512                           | 0.00094421                            | -0.04284581                          |
| 8C_ee     | Gas Phase  | -429.7853935                        | 0.20972313             | 0.00893673                           | 0.00094421                            | -0.04284051                          |
| 8C_ee     | Water      | -429.7941218                        | 0.20920212             | 0.00894845                           | 0.00094421                            | -0.04287023                          |
| 8C_ea     | Gas Phase  | -429.7845618                        | 0.20966686             | 0.00895802                           | 0.00094421                            | -0.04288716                          |
| 8C_ea     | Water      | -429.7942459                        | 0.20922986             | 0.00898115                           | 0.00094421                            | -0.04294813                          |



| Comp. No. | Solvent    | Electronic Energy [E <sub>h</sub> ] | ZPVE [E <sub>h</sub> ] | Thermal Correction [E <sub>h</sub> ] | Enthalpy Correction [E <sub>h</sub> ] | Entropy Correction [E <sub>h</sub> ] |
|-----------|------------|-------------------------------------|------------------------|--------------------------------------|---------------------------------------|--------------------------------------|
| 9A_a      | Gas Phase  | -940.1948588                        | 0.18916859             | 0.01366254                           | 0.00094421                            | -0.0541192                           |
| 9A_a      | Chloroform | -940.2104416                        | 0.18883027             | 0.01363615                           | 0.00094421                            | -0.05401677                          |
| 9A_e      | Gas Phase  | -940.1950964                        | 0.18950613             | 0.01361881                           | 0.00094421                            | -0.05405058                          |
| 9A_e      | Chloroform | -940.2069659                        | 0.18897225             | 0.01366124                           | 0.00094421                            | -0.0541473                           |
| 9B_a      | Gas Phase  | -490.0979344                        | 0.18856093             | 0.00844122                           | 0.00094421                            | -0.04214427                          |
| 9B_a      | Water      | -490.2039846                        | 0.18870557             | 0.00849228                           | 0.00094421                            | -0.04227794                          |
| 9B_e      | Gas Phase  | -490.0826093                        | 0.18850663             | 0.0085208                            | 0.00094421                            | -0.04238395                          |
| 9B_e      | Water      | -490.1957649                        | 0.18866672             | 0.00854106                           | 0.00094421                            | -0.04245688                          |
| 9C_ae     | Gas Phase  | -489.7300861                        | 0.17331171             | 0.00844661                           | 0.00094421                            | -0.04215687                          |
| 9C_ae     | Water      | -489.7466928                        | 0.1731928              | 0.00836933                           | 0.00094421                            | -0.04196661                          |
| 9C_aa     | Gas Phase  | -489.735469                         | 0.17365755             | 0.00839375                           | 0.00094421                            | -0.04208115                          |
| 9C_aa     | Water      | -489.7482402                        | 0.17330843             | 0.00841727                           | 0.00094421                            | -0.04212243                          |
| 9C_ee     | Gas Phase  | -489.7330015                        | 0.17391362             | 0.00836761                           | 0.00094421                            | -0.04202201                          |
| 9C_ee     | Water      | -489.7439577                        | 0.17342684             | 0.00839712                           | 0.00094421                            | -0.04208546                          |
| 9C_ea     | Gas Phase  | -489.7319796                        | 0.1737738              | 0.0084125                            | 0.00094421                            | -0.04211834                          |
| 9C_ea     | Water      | -489.7441242                        | 0.17341379             | 0.00845053                           | 0.00094421                            | -0.04222066                          |
| 10A_a     | Gas Phase  | -801.6284032                        | 0.16896879             | 0.01137663                           | 0.00094421                            | -0.04946828                          |
| 10A_a     | Chloroform | -801.6395066                        | 0.16850184             | 0.01137936                           | 0.00094421                            | -0.0494352                           |
| 10A_e     | Gas Phase  | -801.6273874                        | 0.16887529             | 0.01133477                           | 0.00094421                            | -0.04927865                          |
| 10A_e     | Chloroform | -801.6390035                        | 0.16851712             | 0.01135683                           | 0.00094421                            | -0.04930666                          |
| 10B_a     | Gas Phase  | -351.5301748                        | 0.16823669             | 0.00627341                           | 0.00094421                            | -0.03719035                          |
| 10B_a     | Water      | -351.6347746                        | 0.16811316             | 0.00637208                           | 0.00094421                            | -0.03749039                          |
| 10B_e     | Gas Phase  | -351.5250141                        | 0.16804432             | 0.00632918                           | 0.00094421                            | -0.03737591                          |
| 10B_e     | Water      | -351.6334149                        | 0.16823859             | 0.00629825                           | 0.00094421                            | -0.0373068                           |
| 10C_ae    | Gas Phase  | -351.1625006                        | 0.15325032             | 0.0061813                            | 0.00094421                            | -0.03700131                          |
| 10C_ae    | Water      | -351.1713795                        | 0.15276061             | 0.00618994                           | 0.00094421                            | -0.03701612                          |
| 10C_aa    | Gas Phase  | -351.1610358                        | 0.15307855             | 0.00620771                           | 0.00094421                            | -0.03705125                          |
| 10C_aa    | Water      | -351.1708619                        | 0.15269659             | 0.006236                             | 0.00094421                            | -0.03712181                          |
| 10C_ee    | Gas Phase  | -351.1623525                        | 0.15304856             | 0.00621035                           | 0.00094421                            | -0.03709128                          |
| 10C_ee    | Water      | -351.1714528                        | 0.15271887             | 0.00620835                           | 0.00094421                            | -0.03708517                          |

| Comp. No. | Solvent    | Electronic Energy [E <sub>h</sub> ] | ZPVE [E <sub>h</sub> ] | Thermal Correction [E <sub>h</sub> ] | Enthalpy Correction [E <sub>h</sub> ] | Entropy Correction [E <sub>h</sub> ] |
|-----------|------------|-------------------------------------|------------------------|--------------------------------------|---------------------------------------|--------------------------------------|
| 10C_ea    | Gas Phase  | -351.1617011                        | 0.15298624             | 0.00623675                           | 0.00094421                            | -0.0371581                           |
| 10C_ea    | Water      | -351.1718592                        | 0.1527355              | 0.00624111                           | 0.00094421                            | -0.03716634                          |
| 11A_a     | Gas Phase  | -840.9422407                        | 0.19702256             | 0.01289005                           | 0.00094421                            | -0.05248776                          |
| 11A_a     | Chloroform | -840.9530003                        | 0.19638325             | 0.01295953                           | 0.00094421                            | -0.05259982                          |
| 11A_e     | Gas Phase  | -840.9401224                        | 0.19729802             | 0.01269629                           | 0.00094421                            | -0.05183244                          |
| 11A_e     | Chloroform | -840.9514582                        | 0.19705445             | 0.01268718                           | 0.00094421                            | -0.05179894                          |
| 11B_a     | Gas Phase  | -390.8455476                        | 0.19638472             | 0.00772018                           | 0.00094421                            | -0.04030837                          |
| 11B_a     | Water      | -390.947998                         | 0.19640458             | 0.00773805                           | 0.00094421                            | -0.04037977                          |
| 11B_e     | Gas Phase  | -390.8394488                        | 0.19644097             | 0.00768542                           | 0.00094421                            | -0.04026069                          |
| 11B_e     | Water      | -390.9445031                        | 0.19652299             | 0.00772373                           | 0.00094421                            | -0.04037976                          |
| 11C_ae    | Gas Phase  | -390.4758974                        | 0.18130604             | 0.00763625                           | 0.00094421                            | -0.04013822                          |
| 11C_ae    | Water      | -390.4846589                        | 0.18076428             | 0.00764669                           | 0.00094421                            | -0.04015891                          |
| 11C_aa    | Gas Phase  | -390.4746895                        | 0.18117078             | 0.00766404                           | 0.00094421                            | -0.04019458                          |
| 11C_aa    | Water      | -390.484392                         | 0.18072055             | 0.00769225                           | 0.00094421                            | -0.04026321                          |
| 11C_ee    | Gas Phase  | -390.4742425                        | 0.18137817             | 0.00759151                           | 0.00094421                            | -0.04003891                          |
| 11C_ee    | Water      | -390.4829239                        | 0.18084404             | 0.00761397                           | 0.00094421                            | -0.04008927                          |
| 11C_ea    | Gas Phase  | -390.4736172                        | 0.18140477             | 0.00759064                           | 0.00094421                            | -0.04003769                          |
| 11C_ea    | Water      | -390.4833872                        | 0.1810943              | 0.00759572                           | 0.00094421                            | -0.04005261                          |
| 12A_a     | Gas Phase  | -840.9408223                        | 0.19724261             | 0.01275249                           | 0.00094421                            | -0.05207009                          |
| 12A_a     | Chloroform | -840.9516784                        | 0.19671955             | 0.0127605                            | 0.00094421                            | -0.05210527                          |
| 12A_e     | Gas Phase  | -840.9351937                        | 0.19721311             | 0.01260137                           | 0.00094421                            | -0.05161401                          |
| 12A_e     | Chloroform | -840.9461902                        | 0.19679629             | 0.01264337                           | 0.00094421                            | -0.05177724                          |
| 12B_a     | Gas Phase  | -390.8460162                        | 0.1964402              | 0.00761188                           | 0.00094421                            | -0.0400317                           |
| 12B_a     | Water      | -390.9464266                        | 0.19640999             | 0.00763112                           | 0.00094421                            | -0.04010392                          |
| 12B_e     | Gas Phase  | -390.8445704                        | 0.19589943             | 0.00776609                           | 0.00094421                            | -0.04053595                          |
| 12B_e     | Water      | -390.9484908                        | 0.19602502             | 0.00771969                           | 0.00094421                            | -0.04040068                          |
| 12C_ae    | Gas Phase  | -390.4741778                        | 0.18142212             | 0.00754636                           | 0.00094421                            | -0.03990905                          |
| 12C_ae    | Water      | -390.4828002                        | 0.18093447             | 0.00755173                           | 0.00094421                            | -0.03992208                          |
| 12C_aa    | Gas Phase  | -390.4729092                        | 0.18134933             | 0.00755644                           | 0.00094421                            | -0.03993927                          |
| 12C_aa    | Water      | -390.4825491                        | 0.18095488             | 0.00755639                           | 0.00094421                            | -0.03994456                          |

| <b>Comp. No.</b> | <b>Solvent</b> | <b>Electronic Energy [E<sub>h</sub>]</b> | <b>ZPVE [E<sub>h</sub>]</b> | <b>Thermal Correction [E<sub>h</sub>]</b> | <b>Enthalpy Correction [E<sub>h</sub>]</b> | <b>Entropy Correction [E<sub>h</sub>]</b> |
|------------------|----------------|------------------------------------------|-----------------------------|-------------------------------------------|--------------------------------------------|-------------------------------------------|
| 12C_ee           | Gas Phase      | -390.478286                              | 0.18098152                  | 0.00762949                                | 0.00094421                                 | -0.04022217                               |
| 12C_ee           | Water          | -390.487877                              | 0.18054816                  | 0.0076358                                 | 0.00094421                                 | -0.04023338                               |
| 12C_ea           | Gas Phase      | -390.4773269                             | 0.180909                    | 0.00765765                                | 0.00094421                                 | -0.04029172                               |
| 12C_ea           | Water          | -390.4873876                             | 0.18060441                  | 0.00765247                                | 0.00094421                                 | -0.04027854                               |
| 13_e             | Gas Phase      | -603.0972636                             | 0.1835471                   | 0.01033272                                | 0.00094421                                 | -0.04693444                               |
| 13_e             | Chloroform     | -603.1117176                             | 0.18336318                  | 0.01030775                                | 0.00094421                                 | -0.04681252                               |
| 13_e             | DMSO           | -603.1159209                             | 0.18333834                  | 0.01028599                                | 0.00094421                                 | -0.04672462                               |
| 13_a             | Gas Phase      | -603.0955554                             | 0.18373162                  | 0.01012498                                | 0.00094421                                 | -0.04614494                               |
| 13_a             | Chloroform     | -603.1128621                             | 0.18346349                  | 0.01018112                                | 0.00094421                                 | -0.04629832                               |
| 13_a             | DMSO           | -603.1182766                             | 0.18349889                  | 0.01009694                                | 0.00094421                                 | -0.04607357                               |
| 14_a             | Gas Phase      | -721.0227066                             | 0.26909697                  | 0.0141355                                 | 0.00094421                                 | -0.05425624                               |
| 14_a             | Chloroform     | -721.0386691                             | 0.26890454                  | 0.01401152                                | 0.00094421                                 | -0.05391373                               |
| 14_a             | DMSO           | -721.043748                              | 0.26864042                  | 0.01410023                                | 0.00094421                                 | -0.05408482                               |
| 14_e             | Gas Phase      | -721.0261475                             | 0.26900742                  | 0.01424383                                | 0.00094421                                 | -0.05457529                               |
| 14_e             | Chloroform     | -721.0389444                             | 0.26838451                  | 0.01440748                                | 0.00094421                                 | -0.05514869                               |
| 14_e             | DMSO           | -721.0427078                             | 0.26816454                  | 0.01356182                                | 0.00094421                                 | -0.05320403                               |
| 15_e             | Gas Phase      | -796.2833106                             | 0.2733248                   | 0.01528841                                | 0.00094421                                 | -0.05702432                               |
| 15_e             | Chloroform     | -796.2947864                             | 0.27247927                  | 0.0154523                                 | 0.00094421                                 | -0.05765734                               |
| 15_e             | DMSO           | -796.2980458                             | 0.27220275                  | 0.01458901                                | 0.00094421                                 | -0.05553863                               |
| 15_a             | Gas Phase      | -796.2803916                             | 0.27360263                  | 0.01500503                                | 0.00094421                                 | -0.05612973                               |
| 15_a             | Chloroform     | -796.294654                              | 0.2729218                   | 0.01508514                                | 0.00094421                                 | -0.05634949                               |
| 15_a             | DMSO           | -796.2990611                             | 0.27267934                  | 0.01516926                                | 0.00094421                                 | -0.05663547                               |

| Comp. No. | Solvent         | Electronic Energy [E <sub>h</sub> ] | ZPVE [E <sub>h</sub> ] | Thermal Correction [E <sub>h</sub> ] | Enthalpy Correction [E <sub>h</sub> ] | Entropy Correction [E <sub>h</sub> ] |
|-----------|-----------------|-------------------------------------|------------------------|--------------------------------------|---------------------------------------|--------------------------------------|
| 16_a      | Gas Phase       | -741.6777787                        | 0.20495266             | 0.01195644                           | 0.00094421                            | -0.05024991                          |
| 16_a      | Benzene         | -741.6837267                        | 0.20467546             | 0.01192003                           | 0.00094421                            | -0.05013012                          |
| 16_a      | Dichloromethane | -741.6881253                        | 0.20427648             | 0.01200668                           | 0.00094421                            | -0.05032388                          |
| 16_a      | Chloroform      | -741.6867806                        | 0.20442826             | 0.01196373                           | 0.00094421                            | -0.05021864                          |
| 16_a      | DMSO            | -741.68948                          | 0.20430079             | 0.01194774                           | 0.00094421                            | -0.0501768                           |
| 16_a      | Water           | -741.6896129                        | 0.20424224             | 0.01194608                           | 0.00094421                            | -0.05017117                          |
| 16_e      | Gas Phase       | -741.6804458                        | 0.20459883             | 0.01202547                           | 0.00094421                            | -0.05043681                          |
| 16_e      | Benzene         | -741.686371                         | 0.20426839             | 0.01201741                           | 0.00094421                            | -0.05038409                          |
| 16_e      | Dichloromethane | -741.6907413                        | 0.20400414             | 0.01202506                           | 0.00094421                            | -0.05036565                          |
| 16_e      | Chloroform      | -741.6894009                        | 0.20408999             | 0.01201979                           | 0.00094421                            | -0.05036716                          |
| 16_e      | DMSO            | -741.6920886                        | 0.20392426             | 0.01203885                           | 0.00094421                            | -0.05039664                          |
| 16_e      | Water           | -741.6922254                        | 0.20392097             | 0.01203781                           | 0.00094421                            | -0.05039309                          |
| 17_a      | Gas Phase       | -940.1937221                        | 0.18934864             | 0.01356321                           | 0.00094421                            | -0.05388173                          |
| 17_a      | Benzene         | -940.2042222                        | 0.18902016             | 0.01269026                           | 0.00094421                            | -0.051956                            |
| 17_a      | Dichloromethane | -940.212114                         | 0.18884457             | 0.01358664                           | 0.00094421                            | -0.0538402                           |
| 17_a      | Chloroform      | -940.2096648                        | 0.1889022              | 0.01357705                           | 0.00094421                            | -0.05385483                          |
| 17_a      | DMSO            | -940.2144477                        | 0.18882597             | 0.01353705                           | 0.00094421                            | -0.05368567                          |
| 17_a      | Water           | -940.2147229                        | 0.18880469             | 0.01354923                           | 0.00094421                            | -0.05376113                          |
| 17_e      | Gas Phase       | -940.1980607                        | 0.18916465             | 0.01367332                           | 0.00094421                            | -0.05412402                          |
| 17_e      | Benzene         | -940.2059744                        | 0.18885374             | 0.01370735                           | 0.00094421                            | -0.0541995                           |
| 17_e      | Dichloromethane | -940.2115064                        | 0.18862292             | 0.01372987                           | 0.00094421                            | -0.05424675                          |
| 17_e      | Chloroform      | -940.2098409                        | 0.18869868             | 0.01372265                           | 0.00094421                            | -0.05423674                          |
| 17_e      | DMSO            | -940.2131561                        | 0.18865707             | 0.01369387                           | 0.00094421                            | -0.05414439                          |
| 17_e      | Water           | -940.2133225                        | 0.18861600             | 0.01370394                           | 0.00094421                            | -0.05417927                          |

### 1A\_a, Gas Phase

|   |                   |                   |                   |
|---|-------------------|-------------------|-------------------|
| C | -5.32148868182699 | 2.09878327766517  | 0.22079697168556  |
| C | -5.23346030419343 | 0.87802802348472  | -0.68402663354220 |
| C | -4.10695217206062 | 2.99348629428958  | 0.06145065498225  |
| F | -5.39195216243847 | 1.66011122938655  | 1.53279694706958  |
| H | -6.24366217325913 | 2.64162723360519  | 0.00670115144496  |
| C | -2.82285639685548 | 2.19881356943477  | 0.27639690831311  |
| H | -4.1768895881526  | 3.82839340301073  | 0.75838257719594  |
| H | -4.12581889957939 | 3.40996537718733  | -0.95036864039914 |
| C | -2.79628009052503 | 0.96300075510301  | -0.61556007377435 |
| H | -2.75290511020031 | 1.88840540830251  | 1.31971514979651  |
| H | -1.95242606041206 | 2.81935611244344  | 0.06006615862235  |
| N | -4.00235804653050 | 0.16414611228502  | -0.43394670873968 |
| H | -1.93843379910639 | 0.33460593553143  | -0.39816117676228 |
| H | -2.74849333062755 | 1.26404525442352  | -1.66757047459166 |
| H | -5.24625009022098 | 1.21289802781311  | -1.72631470094918 |
| H | -6.09475344395353 | 0.24057737759436  | -0.52619848954207 |
| C | -3.89375569705770 | -1.07479993372055 | 0.08794215198142  |
| O | -2.85834431881585 | -1.59107730834543 | 0.42036182066037  |
| C | -5.19301631992636 | -1.91760203178182 | 0.21720124928083  |
| F | -5.81406740535775 | -2.02788720170980 | -0.96624958185170 |
| F | -6.05749756436130 | -1.38097761712174 | 1.08307346118588  |
| F | -4.89787897387592 | -3.13181929888108 | 0.63490127793350  |

### 1A\_a, Toluene

|   |                   |                   |                   |
|---|-------------------|-------------------|-------------------|
| C | -5.32300254625423 | 2.10270935505912  | 0.21368983007350  |
| C | -5.23146809528845 | 0.87644659542880  | -0.68038463706348 |
| C | -4.10753510091177 | 2.99483601679528  | 0.06276139530000  |
| F | -5.40725397097791 | 1.66791689639119  | 1.53347735232627  |
| H | -6.24306688721223 | 2.64315465586453  | -0.00922597887165 |
| C | -2.82244125487348 | 2.20250043898443  | 0.27936510195647  |
| H | -4.18035714770940 | 3.82916013079274  | 0.76015666499297  |
| H | -4.12451183035151 | 3.41150876021881  | -0.94850110906458 |
| C | -2.79348818725388 | 0.96451463572913  | -0.60856645631452 |
| H | -2.74604896185516 | 1.89723658363215  | 1.32397007655331  |
| H | -1.95424425284061 | 2.82306092068899  | 0.05549901265756  |
| N | -3.99940771525307 | 0.16270557597211  | -0.41673827318014 |
| H | -1.93038254980908 | 0.34289604300652  | -0.39525463898342 |
| H | -2.75681866976669 | 1.26120269731702  | -1.66126303369408 |
| H | -5.23339350203494 | 1.20456151677494  | -1.72364857260718 |
| H | -6.09572277671212 | 0.24276091191446  | -0.52545781822248 |
| C | -3.89358087783506 | -1.07848088838737 | 0.07705177239550  |
| O | -2.85635732486092 | -1.61543684086940 | 0.39129484745722  |
| C | -5.19511497701806 | -1.91611644417140 | 0.21624186065084  |
| F | -5.82848726666876 | -2.02861869653257 | -0.95842763888079 |
| F | -6.04889652053747 | -1.38220446741847 | 1.09380693893491  |
| F | -4.89795958397519 | -3.13423439719099 | 0.63154330358377  |

### 1A\_e, Gas Phase

|   |                   |                   |                   |
|---|-------------------|-------------------|-------------------|
| C | -5.99242294614089 | 1.71215752892824  | -1.28228139793338 |
| C | -5.61857173331416 | 0.69399871090271  | -0.21169802739316 |
| C | -4.90975613298309 | 2.75888411102150  | -1.44897143584107 |
| F | -7.17265666057111 | 2.31821409798580  | -0.89691245498612 |
| H | -6.17647424186008 | 1.19043421941482  | -2.22602238072229 |
| C | -3.55768178694023 | 2.09807873627972  | -1.70835832763652 |
| H | -4.86562113727813 | 3.34406273162187  | -0.52570739311305 |
| H | -5.17639379075101 | 3.43961994260653  | -2.25726041927700 |
| C | -3.24613017926745 | 1.06311466664842  | -0.63460650344428 |
| H | -2.76916135003678 | 2.85126605729504  | -1.72715310733123 |
| H | -3.55527557486970 | 1.60557633107947  | -2.68364462446297 |
| N | -4.33761224140014 | 0.10179752500004  | -0.53466330762011 |
| H | -3.13405861488630 | 1.55470993464325  | 0.33692198844767  |
| H | -2.33233179401556 | 0.51976602543548  | -0.85310955636612 |
| H | -6.39527225537491 | -0.05591848396208 | -0.12287030868174 |
| H | -5.53648629121300 | 1.21219871408308  | 0.74878283844918  |
| C | -4.08960145537598 | -1.19524943659748 | -0.80984111437144 |
| O | -3.01016240520535 | -1.64137530586430 | -1.10223136116009 |
| C | -5.28445870608269 | -2.18309810031553 | -0.74791521103368 |
| F | -6.2437311777089  | -1.83686186746366 | -1.61743891262834 |
| F | -5.83057973636134 | -2.21968896209488 | 0.47281871113855  |
| F | -4.87958984830122 | -3.39879717664801 | -1.05075769403280 |

### 1A\_e, Toluene

|   |                   |                   |                   |
|---|-------------------|-------------------|-------------------|
| C | -5.98754777140911 | 1.71211501096241  | -1.28769700983232 |
| C | -5.61768681484966 | 0.69227457195634  | -0.21798723119531 |
| C | -4.91006967561238 | 2.76322291099130  | -1.44506939781205 |
| F | -7.17608496168129 | 2.31397806646279  | -0.89954314356681 |
| H | -6.17233335916623 | 1.19750594596330  | -2.23417491328523 |
| C | -3.55833647324425 | 2.10292614344811  | -1.70781157301941 |
| H | -4.86502380816450 | 3.34176215003276  | -0.51784417984305 |
| H | -5.17461150919793 | 3.44590445382993  | -2.25234145632831 |
| C | -3.24483686859915 | 1.06381943203636  | -0.63938259137672 |
| H | -2.76994730303646 | 2.85595427820755  | -1.71888246782919 |
| H | -3.55675965435489 | 1.61727327122547  | -2.68634572184645 |
| N | -4.33655586736740 | 0.09793632522928  | -0.54539315781804 |
| H | -3.13922297063202 | 1.54809718379359  | 0.33556350829396  |
| H | -2.32807723283688 | 0.52741887838732  | -0.86004412729041 |
| H | -6.39657269880970 | -0.05522310177206 | -0.12937221768286 |
| H | -5.52781947356054 | 1.20728083956170  | 0.74265580839053  |
| C | -4.09346091314616 | -1.19425842915333 | -0.8093910758956  |
| O | -3.01235161494693 | -1.65269889394573 | -1.09769105628213 |
| C | -5.28807164408118 | -2.18264111802868 | -0.74156624681621 |
| F | -6.25054285170520 | -1.84775172015798 | -1.60942158233709 |
| F | -5.82945636094667 | -2.22094076788946 | 0.48032260408286  |
| F | -4.87866017265147 | -3.40109261037895 | -1.04150276901617 |

### 1B\_a, Gas Phase

|   |                   |                    |                   |
|---|-------------------|--------------------|-------------------|
| C | -5.38118290670021 | 1.36934314817799   | -0.43140692022412 |
| C | -4.5222332225276  | 0.63943450131116   | -1.44819197314312 |
| C | -4.59926740703858 | 1.70997331714868   | 0.82157555120911  |
| C | -3.98612578397298 | 0.44996960644944   | 1.42708812937993  |
| C | -3.18405804462960 | -0.33695184402030  | 0.40716031388013  |
| N | -4.03932425923705 | -0.61954115607277  | -0.79879838398568 |
| H | -4.77478860982288 | -0.181855038972961 | 1.83966558654737  |
| H | -3.32536266905015 | 0.7056653883217    | 2.25410330177953  |
| H | -5.82675647914079 | 2.25207713059679   | -0.88811169974140 |
| F | -6.40038502114223 | 0.48529949343294   | -0.10345967653538 |
| H | -5.09552307012229 | 0.36977050397547   | -2.33124499795217 |
| H | -3.65140385885745 | 1.22707762990600   | -1.73366328392586 |
| H | -5.26144991556595 | 2.19267146239722   | 1.53858939906354  |
| H | -3.82359749686467 | 2.43474274146696   | 0.56123370772022  |
| H | -2.32432217291490 | 0.22584785458922   | 0.04403699434971  |
| H | -2.84436599615786 | -1.292325436972561 | 1.79887556907313  |
| H | -3.52862480743946 | -1.19233872604531  | -1.47025211081058 |
| H | -4.86632827909019 | -1.15094189344048  | -0.50821950668435 |

### 1B\_a, Water

|   |                   |                   |                   |
|---|-------------------|-------------------|-------------------|
| C | -5.37555643922067 | 1.38712407181652  | -0.43140491814149 |
| C | -4.54852078286180 | 0.61161954416939  | -1.43167596066371 |
| C | -4.59837170490645 | 1.70368995207591  | 0.82802343811486  |
| C | -3.99800134778135 | 0.4366689283599   | 1.42746631795700  |
| C | -3.17915024522280 | -0.32474509878992 | 0.40455024243081  |
| N | -4.02154608431824 | -0.62284761985514 | -0.79157098153346 |
| H | -4.79089147952478 | -0.20939359685206 | 1.80914395386754  |
| H | -3.35150603825812 | 0.68377291602991  | 2.26798148427240  |
| H | -5.75861921572923 | 2.28849357593033  | -0.90617441392195 |
| F | -6.47470851215403 | 0.58626158677941  | -0.09745975824224 |
| H | -5.14018534677284 | 0.31866618537971  | -2.29350635242407 |
| H | -3.69555735107182 | 1.20538291907956  | -1.75433185102645 |
| H | -5.25485196245337 | 2.19992487174503  | 1.54171127104505  |
| H | -3.80693357393961 | 2.40866296055215  | 0.56252905922610  |
| H | -2.33618438493716 | 0.26403070100636  | 0.04605383467883  |
| H | -2.81865117710752 | -1.27354752901347 | 0.78961550299619  |
| H | -3.48163118316942 | -1.15471287678285 | -1.47329318651450 |
| H | -4.80423317057079 | -1.22113148610682 | -0.51867768212089 |

### 1B\_e, Gas Phase

|   |                   |                   |                   |
|---|-------------------|-------------------|-------------------|
| C | -5.42960188539503 | 1.34929036811959  | -0.43678253109944 |
| C | -4.58251961231123 | 0.60733942243422  | -1.45066176548275 |
| C | -4.63400478845827 | 1.68644019806731  | 0.82263802710561  |
| C | -4.02816970160602 | 0.43220911194469  | 1.41945004618730  |
| C | -3.19888958988407 | -0.33641588577229 | 0.39367951842883  |
| N | -4.02958089048824 | -0.64058199574366 | -0.81521577931373 |

|   |                   |                   |                   |
|---|-------------------|-------------------|-------------------|
| H | -4.81382483286770 | -0.21563562271224 | 1.82455738665129  |
| F | -3.17297826694542 | 0.74416608008981  | 2.43854746615075  |
| H | -5.79956523844623 | 2.26063379093920  | -0.90485688193505 |
| H | -6.31255703283955 | 0.75235430110222  | -0.18961693557757 |
| H | -5.14678144010045 | 0.30589830012660  | -2.32985346807124 |
| H | -3.72055130205703 | 1.19619290903586  | -1.76314442473022 |
| H | -5.27542248017743 | 2.16585929352477  | 1.56067526593112  |
| H | -3.82699134988010 | 2.38496158803321  | 0.58844992754927  |
| H | -2.36162556130896 | 0.27744577090140  | 0.06341281657152  |
| H | -2.82608175222444 | -1.27131139979755 | 0.80422063368614  |
| H | -3.46875210101378 | -1.15892482280092 | -1.49279518042522 |
| H | -4.80718217399604 | -1.25200140749221 | -0.55373412432661 |

### 1B\_e, Water

|   |                   |                   |                   |
|---|-------------------|-------------------|-------------------|
| C | -5.42759802503277 | 1.35038959541414  | -0.43246588337256 |
| C | -4.58290833228645 | 0.60153090985723  | -1.44201390751592 |
| C | -4.62694802709966 | 1.69206380295992  | 0.82222131384889  |
| C | -4.03886008367953 | 0.42889994221555  | 1.40747757321915  |
| C | -3.20438309715454 | -0.32997037051055 | 0.38814058903438  |
| N | -4.02706794428749 | -0.63259727038354 | -0.81129525357689 |
| H | -4.82657176273055 | -0.21625786131229 | 1.80314724119494  |
| F | -3.19006162190629 | 0.73684386937044  | 2.46182155236797  |
| H | -5.79610241723680 | 2.26040991370579  | -0.90280927873262 |
| H | -6.30083439691646 | 0.74713373102735  | -0.17266903672690 |
| H | -5.15586877976044 | 0.29009296216539  | -2.31012745139329 |
| H | -3.72750055711136 | 1.19162427336848  | -1.76669505562699 |
| H | -5.26407159058250 | 2.17749044449181  | 1.56050360258523  |
| H | -3.81111373374405 | 2.37465940642960  | 0.57210643424254  |
| H | -2.36889336198246 | 0.28540883588985  | 0.05855898361725  |
| H | -2.83688737345560 | -1.26712705785038 | 0.79458529295217  |
| H | -3.45769386716619 | -1.13934106103095 | -1.48915315380737 |
| H | -4.79171502786685 | -1.26333406580782 | -0.56236356230998 |

### 1C\_ae, Gas Phase

|   |                   |                   |                   |
|---|-------------------|-------------------|-------------------|
| C | -5.37619641053129 | 1.38114859883258  | -0.43490158055643 |
| C | -4.53620190300241 | 0.57695543317770  | -1.41300765161446 |
| C | -4.59609159035918 | 1.69337305561255  | 0.82930783732564  |
| C | -3.99539622868178 | 0.42205724691733  | 1.41975326607591  |
| C | -3.16916028718600 | -0.30839885248439 | 0.36878722220017  |
| N | -4.00607986437508 | -0.61044843314175 | -0.77797131155445 |
| H | -4.79891165878840 | -0.23515662157435 | 1.75558178570150  |
| H | -3.37487954130627 | 0.66220116459185  | 2.28404656581569  |
| H | -5.71167595774963 | 2.30150732816973  | -0.91857648908795 |
| F | -6.51584096879013 | 0.66515573824053  | -0.09910665608016 |
| H | -5.15594657028107 | 0.28765957546387  | -2.26149252131774 |
| H | -3.74713777933170 | 1.25480677363129  | -1.78275802197504 |
| H | -5.24833443139391 | 2.19746988041759  | 1.54313162735802  |
| H | -3.79669609351475 | 2.39303926185433  | 0.56602154210120  |
| H | -2.30159111672064 | 0.31850589478672  | 0.09928869597895  |
| H | -2.78619831488737 | -1.24414083090552 | 0.77604765134065  |
| H | -3.52236128310041 | -1.19176521359008 | -1.44642196171152 |

### 1C\_ae, Water

|   |                   |                   |                   |
|---|-------------------|-------------------|-------------------|
| C | -5.36800682641342 | 1.38681335093588  | -0.43867474484200 |
| C | -4.53657404572189 | 0.57566810488824  | -1.41207323224505 |
| C | -4.60073925926293 | 1.69185910081705  | 0.83141810623267  |
| C | -3.99367632532601 | 0.42338619985554  | 1.42283840228150  |
| C | -3.17875047670179 | -0.31436600709610 | 0.36901797257845  |
| N | -4.02520467713703 | -0.62710846711774 | -0.77599911642520 |
| H | -4.78900829188756 | -0.23224526120606 | 1.78398015438385  |
| H | -3.36059148306034 | 0.67269255683541  | 2.27510073401116  |
| H | -5.71121407445636 | 2.30297106198034  | -0.91969917898803 |
| F | -6.52261915919166 | 0.65912321957315  | -0.10574387748699 |
| H | -5.14780905346371 | 0.30104579021804  | -2.27163587540144 |
| H | -3.73236607823497 | 1.23887824628569  | -1.76666570149127 |
| H | -5.25507151555514 | 2.19616384010344  | 1.54354381013929  |
| H | -3.80336670778413 | 2.39301123262722  | 0.56877869500667  |
| H | -2.32119663071054 | 0.31328103818904  | 0.07944719862483  |
| H | -2.78578714008119 | -1.24554409711020 | 0.77682345048791  |
| H | -3.50671825501135 | -1.17165990977895 | -1.45272679686637 |

### 1C\_aa, Gas Phase

|   |                    |                   |                   |
|---|--------------------|-------------------|-------------------|
| C | -5.383327262699692 | 1.38967080844080  | -0.42589557297850 |
| C | -4.55125895609074  | 0.57280405778189  | -1.40190836219068 |
| C | -4.59686388323770  | 1.71090180576678  | 0.83188090345474  |
| C | -3.99878771598035  | 0.44319794622351  | 1.43735365354468  |
| C | -3.21831935716276  | -0.33623564238659 | 0.38024296781582  |
| N | -3.99860648456596  | -0.63093176481786 | -0.81248011163631 |
| H | -4.80449810724636  | -0.18692615350194 | 1.82117020765280  |
| H | -3.35303657281529  | 0.69353105191865  | 2.28091151434021  |
| H | -5.75815519430211  | 2.29902690104577  | -0.90062413930059 |
| F | -6.49851469330322  | 0.62822757822667  | -0.07408161029492 |
| H | -5.15552938765619  | 0.30762386537211  | -2.26949512142385 |
| H | -3.72495050054220  | 1.19850257718894  | -1.75595730726650 |
| H | -5.24169274043857  | 2.22551242086517  | 1.54487199441029  |
| H | -3.79642602470845  | 2.40467502267139  | 0.55643680206848  |
| H | -2.34639573387808  | 0.24832555211592  | 0.06586415755451  |
| H | -2.83941887083874  | -1.27266527014903 | 0.79011904813197  |
| H | -4.75281815023635  | -1.26731075676217 | -0.58350902388215 |

### 1C\_aa, Water

|   |                   |                   |                   |
|---|-------------------|-------------------|-------------------|
| C | -5.37432647923573 | 1.39655489396221  | -0.43093613514302 |
| C | -4.55380551803506 | 0.56859805032783  | -1.40349032834148 |
| C | -4.59994068947921 | 1.70491051700440  | 0.83424289041512  |
| C | -3.99897775525811 | 0.43692928208187  | 1.43587941424125  |
| C | -3.21111886911819 | -0.33302838992706 | 0.37968205337668  |
| N | -3.99964445459848 | -0.63906709864769 | -0.81100373173978 |
| H | -4.79767477286975 | -0.20421060925914 | 1.81749600205658  |
| H | -3.35415115901680 | 0.68897469871542  | 2.27929113140709  |
| H | -5.73637663243034 | 2.30742345552966  | -0.90865293130543 |
| F | -6.51567723385557 | 0.64657345883784  | -0.08656627542450 |
| H | -5.16432829686426 | 0.30407262142405  | -2.26704349021782 |
| H | -3.72948841669737 | 1.19382132220505  | -1.76040418276588 |
| H | -5.24939901785735 | 2.21621020111127  | 1.54578735365295  |
| H | -3.80027926722877 | 2.40124337590694  | 0.56524310078383  |
| H | -2.35041722400606 | 0.26453911142380  | 0.06071599031484  |
| H | -2.82308526156607 | -1.26484251579139 | 0.79137436665208  |
| H | -4.75990895188288 | -1.26077237490503 | -0.55671522796251 |

### 1C\_ee, Gas Phase

|   |                   |                   |                   |
|---|-------------------|-------------------|-------------------|
| C | -5.41969279523247 | 1.35514028713711  | -0.44788299028893 |
| C | -4.55052001594963 | 0.58398067912551  | -1.43230081469529 |
| C | -4.63363340499944 | 1.67925572579942  | 0.82154638837976  |
| C | -4.02595101903969 | 0.41677782279080  | 1.39665978464326  |
| C | -3.19952907095489 | -0.31300630866887 | 0.35061919506189  |
| N | -4.04415512614800 | -0.61668817612041 | -0.78898425741357 |
| H | -4.80684019325343 | -0.24768906889361 | 1.77471318725841  |
| F | -3.20209195617019 | 0.74184951750300  | 2.46434980269972  |
| H | -5.78193779438680 | 2.27486011169410  | -0.90884587482818 |
| H | -6.29196411221683 | 0.74570372378279  | -0.20035913083670 |
| H | -5.13601128362544 | 0.2935305557407   | -2.30478904675403 |
| H | -3.73662875635171 | 1.24184292280353  | -1.77863913621291 |
| H | -5.26614618774376 | 2.16291548480293  | 1.56672273358505  |
| H | -3.81562502081951 | 2.36658513317982  | 0.58608136629127  |
| H | -2.34440004684876 | 0.33264841364746  | 0.09458308042373  |
| H | -2.81257779014637 | -1.23882165420690 | 0.77528673822322  |
| H | -3.55899542611308 | -1.20774516995075 | -1.44829102553669 |

### 1C\_ee, Water

|   |                   |                   |                   |
|---|-------------------|-------------------|-------------------|
| C | -5.42016405755767 | 1.35492012335193  | -0.44595345287008 |
| C | -4.55525598915239 | 0.57938874102458  | -1.42957284364705 |
| C | -4.63198588106071 | 1.68103447650457  | 0.82241349640925  |
| C | -4.03316488704750 | 0.41473777497633  | 1.39131146410648  |
| C | -3.20326823668504 | -0.31540963236551 | 0.35119322279884  |
| N | -4.04888147911118 | -0.62884452324981 | -0.78929853697847 |
| H | -4.81264769563751 | -0.24387909105887 | 1.77980953733785  |
| F | -3.20033721705279 | 0.73752471620768  | 2.47020806111585  |
| H | -5.77606928995301 | 2.27573725026333  | -0.90884103645938 |
| H | -6.29756176526196 | 0.75421997416730  | -0.19304395080176 |
| H | -5.13969543822965 | 0.29257499013787  | -2.30368427585382 |
| H | -3.73530176353416 | 1.22895500500352  | -1.77197722225025 |
| H | -5.26575244683024 | 2.16633066903357  | 1.56556532891314  |

|   |                   |                   |                   |
|---|-------------------|-------------------|-------------------|
| H | -3.81214381739395 | 2.36354473239053  | 0.57898886135220  |
| H | -2.35586407009132 | 0.33378511416012  | 0.08246034600702  |
| H | -2.80907245422863 | -1.23806603733925 | 0.77634199891957  |
| H | -3.52953351117231 | -1.18541428320790 | -1.45545099809938 |

|   |                   |                   |                   |
|---|-------------------|-------------------|-------------------|
| C | -4.31444452537740 | 1.65226070999950  | 1.20864320865379  |
| C | -3.18649819275991 | 0.63731388104599  | 1.23257649754046  |
| C | -2.81703432563172 | 0.17578187867252  | -0.16711988840773 |
| N | -3.99536639874543 | -0.30137376957429 | -0.86007937553813 |
| C | -4.20820377982387 | -1.54799794250357 | -1.31369498165932 |
| O | -5.22158412192675 | -1.92317434237425 | -1.85144378337024 |
| C | -3.05137364496482 | -2.57555831339262 | -1.17442436522882 |
| F | -1.95635809517151 | -2.16028999385443 | -1.82508086371757 |
| F | -3.41858584110332 | -3.73026396886846 | -1.69785413969366 |
| F | -2.71599243843819 | -2.78897511424423 | 0.09947043374536  |
| H | -5.89117456121757 | 0.24488873608333  | -1.51900592071624 |
| H | -4.67426967424841 | 1.53252899804687  | -1.58239120648982 |
| H | -2.40094782485481 | 1.02298627656609  | -0.72053765169355 |
| H | -2.05551792990363 | -0.59192508364160 | -0.10808234850359 |
| H | -6.19206553812722 | 0.20942964289131  | 0.22099658423427  |
| F | -6.18046919864250 | 0.19324737481675  | 1.02000590899364  |
| H | -4.64314703883196 | 1.87376749855584  | 2.22333125202034  |
| H | -3.92379857369213 | 2.57873918142123  | 0.77893265487394  |
| F | -3.56859812259583 | -0.47252442640897 | 1.97004537946125  |
| H | -2.30390234436089 | 1.06035227772103  | 1.71333365305780  |

### 1C\_ea, Gas Phase

|   |                   |                   |                   |
|---|-------------------|-------------------|-------------------|
| C | -5.43634173331009 | 1.36838339098993  | -0.43246689575380 |
| C | -4.58555827280096 | 0.56302538902835  | -1.41216928326851 |
| C | -4.63021338223688 | 1.69390635152229  | 0.82443004714573  |
| C | -4.03519715818233 | 0.430454656466590 | 1.41315797934160  |
| C | -3.23664443466339 | -0.33735937289317 | 0.36879184272578  |
| N | -4.01092518541287 | -0.63534677891809 | -0.82219464555994 |
| H | -4.82774548736244 | -0.21080142663592 | 1.81364915486522  |
| F | -3.20139169042114 | 0.75835364716127  | 2.47259529096088  |
| H | -5.79309550896914 | 2.28771419509476  | -0.90063364711887 |
| H | -6.32089731621361 | 0.78096672682060  | -0.16723047642629 |
| H | -5.16420142827467 | 0.27875176062709  | -2.29139834705838 |
| H | -3.75596338764794 | 1.18474180605483  | -1.76529618284600 |
| H | -5.24480415901749 | 2.19760067435757  | 1.57120151424890  |
| H | -3.80461019425483 | 2.36525639382785  | 0.56999491429238  |
| H | -2.37891040359934 | 0.27803557124415  | 0.07864228444124  |
| H | -2.84583346246042 | -1.26081517086046 | 0.79549209517864  |
| H | -4.73563679517247 | -1.31282781208695 | -0.61938564516855 |

### 1C\_ea, Water

|   |                   |                   |                   |
|---|-------------------|-------------------|-------------------|
| C | -5.43313611492518 | 1.36469755973587  | -0.43355693419930 |
| C | -4.58166669688759 | 0.56510341828104  | -1.41511148718766 |
| C | -4.62847410134264 | 1.69332772519720  | 0.82396792073797  |
| C | -4.04120040411698 | 0.42595973105332  | 1.40378616234178  |
| C | -3.23156257387481 | -0.33532820439980 | 0.36641427054119  |
| N | -4.01044727191218 | -0.64134599353018 | -0.82417701500718 |
| H | -4.82911520254764 | -0.21694237318645 | 1.80457325655709  |
| F | -3.20096129727842 | 0.75023056217855  | 2.47820502482509  |
| H | -5.79045176391247 | 2.28346467611659  | -0.90134640399825 |
| H | -6.31306492064244 | 0.77175338709369  | -0.16744298110217 |
| H | -5.16564333092795 | 0.28178322175048  | -2.29091305543600 |
| H | -3.75154983965863 | 1.18725140414878  | -1.76533545767191 |
| H | -5.24948658079710 | 2.19264282116866  | 1.56858742765446  |
| H | -3.80352871736703 | 2.36479794404098  | 0.56676666787329  |
| H | -2.37974035530205 | 0.28696242276425  | 0.07310785953628  |
| H | -2.84147322599829 | -1.25738842263342 | 0.79716970109466  |
| H | -4.75646760250859 | -1.28692987977955 | -0.5875149565931  |

### 2A\_a, Gas Phase

|   |                   |                   |                    |
|---|-------------------|-------------------|--------------------|
| C | -5.49547788491601 | 1.20136414606274  | 0.36670195753307   |
| C | -5.05203416406787 | 0.68438709051080  | -0.99211531142127  |
| C | -4.31316230226270 | 1.65615610309422  | 1.20753378507599   |
| C | -3.18778059226802 | 0.63581833375096  | 1.23806781704885   |
| C | -2.81836980897996 | 0.17259687015943  | -0.16278226215226  |
| N | -3.99266868225212 | -0.29902628505498 | -0.859747737078820 |
| C | -4.20849192282403 | -1.55128497394068 | -1.32124725947614  |
| O | -5.21703034989721 | -1.91302994523473 | -1.86537580609417  |
| C | -3.05262614028086 | -2.57906804104932 | -1.17940875073376  |
| F | -1.95757359377885 | -2.15529916508462 | -1.82897715937758  |
| F | -3.41496702643112 | -3.73171427123294 | -1.70280411526310  |
| F | -2.71602412099266 | -2.78740861242379 | 0.09505383864382   |
| H | -5.89013741201274 | 0.22752696302279  | -1.50981206971380  |
| H | -4.68672427933247 | 1.52886319947613  | -1.58714892605308  |
| H | -2.39189451335894 | 1.01790843186051  | -0.71430373501257  |
| H | -2.06226984522235 | -0.60056889260848 | -0.10142708681464  |
| H | -6.19103991378920 | 2.03130057880733  | 0.21966719889395   |
| F | -6.17967761457146 | 0.20251040472207  | 1.02663351491863   |
| H | -4.64177835270379 | 1.88129317975319  | 2.22141300990980   |
| H | -3.92084763911737 | 2.58038370909854  | 0.77309149592530   |
| F | -3.56944579854076 | -0.46365802037320 | 1.97690984170049   |
| H | -2.30381804239948 | 1.06311919668404  | 1.71597775325067   |

### 2A\_a, Benzene

|   |                   |                  |                   |
|---|-------------------|------------------|-------------------|
| C | -5.49331044478235 | 1.20338364227745 | 0.36343521543200  |
| C | -5.05119738479974 | 0.68957285676452 | -0.99515626299417 |

### 2A\_a, Dichloromethane

|   |                   |                   |                   |
|---|-------------------|-------------------|-------------------|
| C | -5.49142537618273 | 1.20143269200387  | 0.35680679852920  |
| C | -5.04548354128812 | 0.70024097404201  | -1.00380340354126 |
| C | -4.31779527441729 | 1.64199450317750  | 1.21091734720176  |
| C | -3.18496199394940 | 0.63435241646571  | 1.22469420559098  |
| C | -2.81223357894701 | 0.18470658403579  | -0.17690063151650 |
| N | -3.99229890346521 | -0.29662230364325 | -0.86919791258420 |
| C | -4.21129380849534 | -1.54433286774124 | -1.29696477345741 |
| O | -5.23602469921678 | -1.93471340859059 | -1.81225920529330 |
| C | -3.05312219752292 | -2.57150160762659 | -1.16321654437160 |
| F | -1.96296645840449 | -2.16743360721525 | -1.82435811721563 |
| F | -3.42933525504199 | -3.73055423957509 | -1.67781711408719 |
| F | -2.71022184521497 | -2.78301961601433 | 0.10898123634899  |
| H | -5.88408082408374 | 0.26839412939136  | -1.53952396528719 |
| H | -4.65675699413035 | 1.54606999170635  | -1.57694490855195 |
| H | -2.40795904702411 | 1.03847224488035  | -0.72647960319367 |
| H | -2.04343716974306 | -0.57612309278911 | -0.12555373477936 |
| H | -6.19382087517988 | 2.02434861763230  | 0.22233914634265  |
| F | -6.18026810377785 | 0.17574417702807  | 1.00137512004984  |
| H | -4.64886049414013 | 1.85298957974560  | 2.22709779339317  |
| H | -3.93006469685995 | 2.57429897924258  | 0.79229593610566  |
| F | -3.56602549378412 | -0.48999354624481 | 1.95233864177885  |
| H | -2.30540336913051 | 1.05341940008877  | 1.71207368853815  |

### 2A\_a, Chloroform

|   |                   |                   |                   |
|---|-------------------|-------------------|-------------------|
| C | -5.49205319180212 | 1.20130006413972  | 0.35835594340562  |
| C | -5.04657252819309 | 0.69785851032854  | -1.00206529661224 |
| C | -4.31708389613248 | 1.64433734103503  | 1.21026335785888  |
| C | -3.18535248225441 | 0.63479088186227  | 1.22669218779463  |
| C | -2.81317661371867 | 0.18266033164413  | -0.17462369668364 |
| N | -3.99231680289206 | -0.29704358403111 | -0.86799200300539 |
| C | -4.21087445962244 | -1.54526991785251 | -1.30080418091291 |
| O | -5.23312867646487 | -1.93149423752897 | -1.82067128613024 |
| C | -3.05313657826535 | -2.57263823026593 | -1.16567955938250 |
| F | -1.96192144055215 | -2.16553488584820 | -1.82476560780874 |
| F | -3.42711806893538 | -3.73055492859162 | -1.68213968606452 |
| F | -2.71142881242461 | -2.78412976683622 | 0.10680445066521  |
| H | -5.88524410755102 | 0.26249979020230  | -1.53509152362099 |
| H | -4.66136667122730 | 1.54360942571421  | -1.57827454609916 |
| H | -2.40528350692088 | 1.03495865230322  | -0.72450356758627 |
| H | -2.04636821975985 | -0.58010102306996 | -0.12133145469304 |
| H | -6.19363463946426 | 2.02503052649041  | 0.22214716776132  |
| F | -6.17976839880838 | 0.17939832534876  | 1.0055324613178   |
| H | -4.64768098281087 | 1.85760357175089  | 2.22612840402299  |
| H | -3.92873929521667 | 2.57530626399068  | 0.78899864067397  |
| F | -3.56644455971925 | -0.48567728705346 | 1.95652893621840  |
| H | -2.30514606726385 | 1.05526017626781  | 1.71239007406683  |

### 2A\_a, DMSO

|   |                   |                  |                   |
|---|-------------------|------------------|-------------------|
| C | -5.49078800142334 | 1.19766001790688 | 0.35164830643153  |
| C | -5.03995969098377 | 0.70865435134331 | -1.01134935848757 |
| C | -4.32062713543774 | 1.63337531064269 | 1.21229856970188  |

|   |                   |                   |                   |   |                   |                   |                    |
|---|-------------------|-------------------|-------------------|---|-------------------|-------------------|--------------------|
| C | -3.18393794235160 | 0.63050578798050  | 1.21934002939565  | C | -2.80657089650239 | 0.13315592819999  | -0.09805926466085  |
| C | -2.80783899367855 | 0.19197536231145  | -0.18470443718721 | N | -3.96830197172695 | -0.37342295681905 | -0.81500785136882  |
| N | -3.98732380255106 | -0.29011814410523 | -0.87913438123771 | C | -3.97795354790196 | -1.65734601275218 | -1.22063613275597  |
| C | -4.21460160364306 | -1.54179847033841 | -1.28392106100904 | O | -3.09842391267077 | -2.45449783030147 | -1.00646321792438  |
| O | -5.24846948818835 | -1.93992771756491 | -1.77842888778426 | C | -5.20825540878908 | -2.15225845095559 | -2.02972735047600  |
| C | -3.05607998694507 | -2.56918075633451 | -1.15403163400302 | F | -6.34077753907631 | -2.02731030128067 | -1.328602685345208 |
| F | -1.97061625358584 | -2.17220663735273 | -1.82547915669094 | F | -5.05712715799381 | -3.42675745557667 | -2.33415456781106  |
| F | -3.43888681453971 | -3.73126334127422 | -1.65939645490695 | F | -5.35041694009460 | -1.47057282408937 | -3.17063194636476  |
| F | -2.70456514815278 | -2.77565593383174 | 0.11659519098774  | H | -5.82000884685118 | 0.20532413864728  | -1.63288435190949  |
| H | -5.87617399638429 | 0.28401427955190  | -1.55625060543876 | H | -4.55518613761730 | 1.43555541212208  | -1.66218203704020  |
| H | -4.64565464287018 | 1.55863764936949  | -1.57356446496094 | H | -2.34198729582890 | 0.93100335655587  | -0.68471186524079  |
| H | -2.40936635080547 | 1.05117749506804  | -0.72901022936896 | H | -2.09051123103005 | -0.67041846427618 | 0.03860212106933   |
| H | -2.03480589029625 | -0.56497285962632 | -0.13942396190085 | F | -6.38870710033895 | 2.18956200705708  | -0.01695173067895  |
| H | -6.19581914801966 | 2.01887528437097  | 0.22342512666072  | H | -6.01753793942141 | 0.39527266366986  | 0.79928859421300   |
| F | -6.17865734047800 | 0.16153020960882  | 0.98538702170287  | H | -4.69950205411419 | 2.07294761445126  | 2.04800590651906   |
| H | -4.65402652767727 | 1.83507499938713  | 2.22963479291538  | H | -3.92341633284738 | 2.59910696822966  | 0.54447686811697   |
| H | -3.93541638420924 | 2.57046798279074  | 0.80253658806326  | H | -3.55798971795096 | -0.10357871008516 | 1.90709567826288   |
| F | -3.5633822428093  | -0.50268491752252 | 1.93799723297351  | F | -2.14023017866668 | 1.30858898212288  | 1.82828063011766   |
| H | -2.30684263349780 | 1.04803004761866  | 1.71173177414367  |   |                   |                   |                    |

## 2A\_a, Water

|   |                   |                    |                   |
|---|-------------------|--------------------|-------------------|
| C | -5.49070707117576 | 1.19736799904005   | 0.35109661007657  |
| C | -5.03935266153654 | 0.70941752657847   | -1.01204021693812 |
| C | -4.32095406100442 | 1.63263058333463   | 1.21244461188709  |
| C | -3.18382339706869 | 0.63031166674251   | 1.21887140257162  |
| C | -2.80738903265819 | 0.19262595015247   | -0.18533205318376 |
| N | -3.98688789657876 | -0.28960572656631  | -0.87980264069864 |
| C | -4.21495830722294 | -1.541602999795969 | -1.28250454530009 |
| O | -5.24974289206749 | -1.94034249542814  | -1.77498993283194 |
| C | -3.05637301913228 | -2.56899965643722  | -1.15335471639950 |
| F | -1.97146704244371 | -2.17255799484905  | -1.82582880118969 |
| F | -3.43985188115585 | -3.73129142236054  | -1.65796336006676 |
| F | -2.70388966300996 | -2.77517113184730  | 0.11705575977840  |
| H | -5.87530132233790 | 0.28541734955535   | -1.55783495421885 |
| H | -4.64436676049308 | 1.55965478691776   | -1.57332031523669 |
| H | -2.40944569388143 | 1.05219853195662   | -0.72936049279210 |
| H | -2.03404981025760 | -0.56403702940161  | -0.14044850755461 |
| H | -6.19610333069205 | 2.01831794894466   | 0.22346770157971  |
| F | -6.17851114425183 | 0.16018253657070   | 0.98374644918019  |
| H | -4.65461314929197 | 1.83342336844228   | 2.22987297467195  |
| H | -3.93602722533388 | 2.57022323981849   | 0.80357250513716  |
| F | -3.56304072884438 | -0.50368701453796  | 1.93678228324063  |
| H | -2.30698390956128 | 1.04769398313385   | 1.71177023828742  |

## 2A\_e, Dichloromethane

|   |                   |                   |                   |
|---|-------------------|-------------------|-------------------|
| C | -5.48236399961090 | 1.17640530419264  | 0.25707338758549  |
| C | -4.99187269732562 | 0.61932482331600  | -1.07200565963137 |
| C | -4.33765296531952 | 1.74321519590598  | 1.07417438438208  |
| C | -3.24511247881649 | 0.70544569025600  | 1.24531301425817  |
| C | -2.80738956607184 | 0.13175693857135  | -0.09524607391508 |
| N | -3.96974880957233 | -0.37801584008843 | -0.81128058864377 |
| C | -3.97866650271224 | -1.65473917739540 | -1.22218373576076 |
| O | -3.09635446757276 | -2.45662731183887 | -1.01651663459926 |
| C | -5.20849335839142 | -2.14943995796257 | -2.03246273640677 |
| F | -6.34189303425663 | -2.03211602140694 | -1.33423111851639 |
| F | -5.05245161226728 | -3.42556479829736 | -2.33932278926890 |
| F | -5.35086966192932 | -1.46971327852972 | -3.17347051601008 |
| H | -5.82322581786192 | 0.20334486076807  | -1.62758268813408 |
| H | -4.55312841250633 | 1.42923021814441  | -1.66059496104431 |
| H | -2.34676353987292 | 0.92794434614515  | -0.68640971628455 |
| H | -2.08991098139626 | -0.66939358082562 | 0.04561642818500  |
| F | -6.38936907695811 | 2.18966794247967  | -0.01750636337979 |
| H | -6.01573493687459 | 0.39880381569198  | 0.80766079381043  |
| H | -4.69700869625266 | 2.07884036193368  | 2.04623691851858  |
| H | -3.92038524574296 | 2.59918695771587  | 0.53709459092915  |
| H | -3.56258999892757 | -0.09865605139679 | 1.91114915206799  |
| F | -2.13818413976032 | 1.30843956262086  | 1.82885491185824  |

## 2A\_e, Gas Phase

|   |                   |                   |                   |
|---|-------------------|-------------------|-------------------|
| C | -5.48730074357699 | 1.18065010181729  | 0.25018098511048  |
| C | -4.98977050454420 | 0.62399073505034  | -1.07720761992831 |
| C | -4.34116719684203 | 1.73518525954965  | 1.07666646277810  |
| C | -3.23826035079541 | 0.70480565063605  | 1.24447011887264  |
| C | -2.80685456690662 | 0.13341542015928  | -0.09993668033862 |
| N | -3.96807056021272 | -0.36897358150121 | -0.81744076486605 |
| C | -3.97587966437698 | -1.66102386312631 | -1.22104866411845 |
| O | -3.09693307466571 | -2.45026391003948 | -1.00055850542645 |
| C | -5.20721672280481 | -2.15619404281650 | -2.02765964435058 |
| F | -6.33760485007272 | -2.02375144000390 | -1.32139685180329 |
| F | -5.06129261429879 | -3.42814545657443 | -2.33112046244420 |
| F | -5.35056376592440 | -1.47035886962049 | -3.16714647255704 |
| H | -5.81776028448859 | 0.20556029596093  | -1.63635170627428 |
| H | -4.55930241475682 | 1.44107761736653  | -1.66443494711938 |
| H | -2.33591826017131 | 0.93196613762794  | -0.68182061048545 |
| H | -2.09393890885420 | -0.67428397069479 | 0.03224336007438  |
| F | -6.38724314208887 | 2.19084224352994  | -0.01656424737597 |
| H | -6.01980721408293 | 0.39351950680112  | 0.79145781995588  |
| H | -4.70114288577197 | 2.06948488968234  | 2.04906345278722  |
| H | -3.92567842528040 | 2.59940550271330  | 0.55143201950860  |
| H | -3.55476143083837 | -0.10770131262585 | 1.90353699046735  |
| F | -2.14270241864515 | 1.30813308610821  | 1.82799604853343  |

## 2A\_e, Chloroform

|   |                   |                   |                   |
|---|-------------------|-------------------|-------------------|
| C | -5.48298594375173 | 1.17627238173013  | 0.25561761375052  |
| C | -4.99090796489319 | 0.62072076903535  | -1.07366096054751 |
| C | -4.33853609126418 | 1.74107803699770  | 1.07486838748552  |
| C | -3.24393310166350 | 0.70482659042188  | 1.24472070356538  |
| C | -2.80669983752016 | 0.13286599005541  | -0.09686183582743 |
| N | -3.96864143037587 | -0.37588564206058 | -0.81350086175048 |
| C | -3.97886739234940 | -1.65541963814030 | -1.22079408264700 |
| O | -3.09852015877281 | -2.45651607511163 | -1.01050647052338 |
| C | -5.20869602847847 | -2.15020604396907 | -2.03097753769520 |
| F | -6.34204540013070 | -2.02972199020806 | -1.33231083957083 |
| F | -5.05452351786314 | -3.42609172625699 | -2.33623912678789 |
| F | -5.35039838225829 | -1.47058890413281 | -3.1724233811598  |
| H | -5.82145663076094 | 0.20485825598787  | -1.63059019229984 |
| H | -4.55331237625315 | 1.43229177434976  | -1.66108571313925 |
| H | -2.34532300974825 | 0.93021456450860  | -0.68610809695919 |
| H | -2.08918596624794 | -0.66873672009174 | 0.04205833760916  |
| F | -6.38936282854867 | 2.18912690840130  | -0.01710553093338 |
| H | -6.01620803987598 | 0.39662380359948  | 0.80388931018838  |
| H | -4.69828765956686 | 2.07550755883226  | 2.04721954209412  |
| H | -3.92184432317154 | 2.59900668171806  | 0.54040953818851  |
| H | -3.56050110967000 | -0.10118581032027 | 1.90903980067485  |
| F | -2.13893280683520 | 1.30829923465362  | 1.82870139824093  |

## 2A\_e, Benzene

|   |                   |                  |                   |
|---|-------------------|------------------|-------------------|
| C | -5.48440170332886 | 1.17750256892232 | 0.25363999951856  |
| C | -4.99034301475303 | 0.62192513577160 | -1.07507232004268 |
| C | -4.33957731938791 | 1.73882368149361 | 1.07558344299164  |
| C | -3.24194375310732 | 0.70473454889282 | 1.24449624891695  |

## 2A\_e, DMSO

|   |                   |                  |                   |
|---|-------------------|------------------|-------------------|
| C | -5.48175967671952 | 1.17602724705925 | 0.25802221679237  |
| C | -4.99224249277183 | 0.61872097768259 | -1.07124268705880 |
| C | -4.33710603257616 | 1.74438753865249 | 1.07379860911676  |
| C | -3.24608249939098 | 0.70551659850607 | 1.24549411032636  |
| C | -2.80755620186928 | 0.13155234995402 | -0.09459902176874 |



|   |                   |                   |                   |
|---|-------------------|-------------------|-------------------|
| N | -3.96999754759197 | -0.37920229175506 | -0.81048268523852 |
| C | -3.97894054154612 | -1.65385812495419 | -1.22250673609968 |
| O | -3.09590165901880 | -2.45731359452962 | -1.01907712357951 |
| C | -5.20865050603948 | -2.14854700392342 | -2.03306036000901 |
| F | -6.34226717288723 | -2.03323031899958 | -1.33576884693970 |
| F | -5.05121136076493 | -3.42534271711109 | -2.34026641475998 |
| F | -5.35090445345356 | -1.46981609224981 | -3.17430958171553 |
| H | -5.82400780191579 | 0.20297741948586  | -1.62632806589258 |
| H | -4.55238838185646 | 1.42758545898309  | -1.66011949110357 |
| H | -2.34831726743371 | 0.92744166998769  | -0.68698408436495 |
| H | -2.08951604950565 | -0.66879106946038 | 0.04731127594197  |
| F | -6.38960399070306 | 2.18959692960870  | -0.01759293486731 |
| H | -6.01513260417165 | 0.39964686058521  | 0.80992353183993  |
| H | -4.69634311513694 | 2.08028395562101  | 2.04579431879449  |
| H | -3.91951098056738 | 2.59916641375359  | 0.53509632833780  |
| H | -3.56409177788749 | -0.09750338891547 | 1.91204755347686  |
| F | -2.13763788619197 | 1.30804118201900  | 1.82921008877134  |

## 2A\_e, Water

|   |                   |                   |                   |
|---|-------------------|-------------------|-------------------|
| C | -5.48170027830551 | 1.17597071089433  | 0.25809733806368  |
| C | -4.99225365255543 | 0.61869550064658  | -1.07120280796377 |
| C | -4.33706571257470 | 1.74446584016547  | 1.07377377422463  |
| C | -3.24617493598679 | 0.70550113176398  | 1.24549936606203  |
| C | -2.80755246718672 | 0.13156635359466  | -0.09456916076630 |
| N | -3.96998908127178 | -0.37928204357258 | -0.81045887497197 |
| C | -3.97898353253492 | -1.65375609887288 | -1.22250619266644 |
| O | -3.09590719221354 | -2.45739608590783 | -1.01922956122420 |
| C | -5.20868214235572 | -2.14845452088098 | -2.03308302942917 |
| F | -6.34231977591200 | -2.03329406387209 | -1.33589509011239 |
| F | -5.05112252102664 | -3.42533801359477 | -2.34026452193243 |
| F | -5.35090840899495 | -1.46988376554823 | -3.17439027865985 |
| H | -5.82404577542305 | 0.20299478922684  | -1.62627322643930 |
| H | -4.55228751272492 | 1.42748111263188  | -1.66007322980652 |
| H | -2.34847030412557 | 0.92745767071624  | -0.68704267066669 |
| H | -2.08943454100609 | -0.66868303986952 | 0.04741383699482  |
| F | -6.3896330506775  | 2.18957044551868  | -0.01759214576890 |
| H | -6.01506667236533 | 0.39967921118592  | 0.81008999461621  |
| H | -4.69630242072037 | 2.08035608129864  | 2.04577055389848  |
| H | -3.91944718332112 | 2.59915455848352  | 0.53494938063199  |
| H | -3.56422914078497 | -0.09744287858633 | 1.91208968220038  |
| F | -2.13759371354212 | 1.30797710457841  | 1.82925686371573  |

## 2C\_ee, Gas Phase

|   |                   |                   |                   |
|---|-------------------|-------------------|-------------------|
| C | -5.50478699130178 | 1.27851878588881  | -0.38425569971181 |
| C | -4.62354315194148 | 0.55052243472327  | -1.38549771151688 |
| C | -4.72266937119995 | 1.63288590792131  | 0.86849804456875  |
| C | -4.01896237532667 | 0.41250317449696  | 1.43612532196774  |
| C | -3.19399409836644 | -0.28383208181569 | 0.36669579007488  |
| N | -4.07393177386846 | -0.62344263785578 | -0.73501067430544 |
| H | -3.61905470480309 | -1.23390454551928 | -1.39682176885427 |
| H | -5.22077636765058 | 0.24662026588099  | -2.24433551307182 |
| H | -4.73838530675017 | -0.29409107537028 | 1.85615860906646  |
| F | -3.18194719790860 | 0.81324676122076  | 2.46334286512325  |
| H | -3.85190919746668 | 1.25504685865422  | -1.73216538318969 |
| F | -5.97988921616470 | 2.44322103259675  | -0.96214963022465 |
| H | -6.36923755512673 | 0.65577140458120  | -0.14299858349171 |
| H | -2.37667875138990 | 0.39374680108682  | 0.07541243966375  |
| H | -2.75570769165301 | -1.19238895038662 | 0.77787459401885  |
| H | -5.37856108988486 | 2.07904063850790  | 1.61596826514360  |
| H | -3.96200515919688 | 2.37033522538864  | 0.59837903473898  |

## 2C\_ee, Benzene

|   |                   |                   |                   |
|---|-------------------|-------------------|-------------------|
| C | -5.50426510764347 | 1.27508708901019  | -0.38184732900011 |
| C | -4.62510279904014 | 0.54883458809620  | -1.38446177621847 |
| C | -4.72202178143486 | 1.63399631986389  | 0.86852483136247  |
| C | -4.02230284141668 | 0.41128390768486  | 1.43383294651783  |
| C | -3.19598257169613 | -0.28519502381475 | 0.36710272532258  |
| N | -4.07663365697140 | -0.62835422900168 | -0.73512873944918 |
| H | -3.60548215231643 | -1.22200976919857 | -1.40231794528330 |
| H | -5.22141668963801 | 0.24574282846536  | -2.24414319060730 |
| H | -4.74096814480512 | -0.29130074206760 | 1.86002603806427  |
| F | -3.18079501803079 | 0.81423739591193  | 2.46475808506000  |
| H | -3.84954765119857 | 1.25002146996477  | -1.72761696370677 |

|   |                   |                   |                   |
|---|-------------------|-------------------|-------------------|
| F | -5.98018775371588 | 2.44517332449163  | -0.96283143049833 |
| H | -6.37220751524927 | 0.65888061207598  | -0.13953273352093 |
| H | -2.38201893600951 | 0.39335708635109  | 0.07053250177794  |
| H | -2.75632186925698 | -1.19312549991883 | 0.77800110845512  |
| H | -5.37814141827131 | 2.07985504653133  | 1.61598543467052  |
| H | -3.95864409330544 | 2.36731559555417  | 0.59433643705365  |

## 2C\_ee, Dichloromethane

|   |                   |                   |                   |
|---|-------------------|-------------------|-------------------|
| C | -5.50395982292461 | 1.27271899873416  | -0.38015050141963 |
| C | -4.62618596638370 | 0.54763206664160  | -1.38369172507972 |
| C | -4.72149238145420 | 1.63477250139928  | 0.86849276849058  |
| C | -4.02467022110422 | 0.41040904030587  | 1.43229259965093  |
| C | -3.19737922025302 | -0.28610256598300 | 0.36736717204426  |
| N | -4.07844317868661 | -0.63166520915562 | -0.73518966117354 |
| H | -3.59593178834279 | -1.21320747118145 | -1.40597897564793 |
| H | -5.22176468118795 | 0.24496879914572  | -2.24399798584040 |
| H | -4.74316945505047 | -0.28930474732473 | 1.86234633631658  |
| F | -3.18027187653539 | 0.81494466616018  | 2.46605405434947  |
| H | -3.84784354300571 | 1.24623172100524  | -1.72466781471046 |
| F | -5.98063284890728 | 2.44663928736085  | -0.96311362343150 |
| H | -6.37410103815229 | 0.66085441295894  | -0.13671594656693 |
| H | -2.38566162358797 | 0.39287553158597  | 0.06694040806962  |
| H | -2.75667733213537 | -1.19364744850154 | 0.77790719935337  |
| H | -5.37769986419651 | 2.08057575458192  | 1.61596411592836  |
| H | -3.95615515809187 | 2.36510484226660  | 0.59136157966693  |

## 2C\_ee, Chloroform

|   |                   |                   |                   |
|---|-------------------|-------------------|-------------------|
| C | -5.50404657363386 | 1.27342656228419  | -0.38064764609195 |
| C | -4.62587225309804 | 0.54798195973393  | -1.38392270050420 |
| C | -4.72163940732444 | 1.63455497814690  | 0.86849879243122  |
| C | -4.02396849575401 | 0.41067954108340  | 1.43274905090269  |
| C | -3.19697152976043 | -0.28585111887059 | 0.36729359293328  |
| N | -4.07788695352833 | -0.63068192933625 | -0.73518940695699 |
| H | -3.59869650130228 | -1.21579349331435 | -1.40493958365174 |
| H | -5.22171598246702 | 0.24519054317632  | -2.24401198428021 |
| H | -4.74253141496460 | -0.28988954290799 | 1.86162507096086  |
| F | -3.18042023875951 | 0.81471576609904  | 2.4656477827680   |
| H | -3.84839844319582 | 1.24739119962726  | -1.72557491051685 |
| F | -5.98050350701435 | 2.44617547023451  | -0.96304014237798 |
| H | -6.37350721423017 | 0.66023809727487  | -0.13753503491383 |
| H | -2.38455070227166 | 0.39299313548389  | 0.06806958051115  |
| H | -2.75662754339563 | -1.19351749807956 | 0.77797887835313  |
| H | -5.37780882026613 | 2.08039347486481  | 1.61596589431637  |
| H | -3.95689441903370 | 2.36579285449960  | 0.59225277060823  |

## 2C\_ee, DMSO

|   |                   |                   |                   |
|---|-------------------|-------------------|-------------------|
| C | -5.50388344664023 | 1.27199396863767  | -0.37963300665206 |
| C | -4.62650006675729 | 0.54730069208188  | -1.38345714115290 |
| C | -4.72129511007881 | 1.63502258807821  | 0.86844827196614  |
| C | -4.02538385097533 | 0.41015582825832  | 1.43183267657581  |
| C | -3.19781244694700 | -0.28638625661391 | 0.36745916175716  |
| N | -4.07898193678030 | -0.63263486411470 | -0.73521697486008 |
| H | -3.59308237928625 | -1.21050418278005 | -1.40705217457500 |
| H | -5.22181030352012 | 0.24477358437099  | -2.24398707822654 |
| H | -4.74389015993336 | -0.28866620066303 | 1.86301138508363  |
| F | -3.18016521055085 | 0.81515143110692  | 2.46648507975220  |
| H | -3.84730328368987 | 1.24509645217882  | -1.72376726586557 |
| F | -5.98090474520646 | 2.44703911968752  | -0.96313651464314 |
| H | -6.37462131283165 | 0.66135873158146  | -0.13580293320830 |
| H | -2.38673975793437 | 0.39266934417699  | 0.06586111097892  |
| H | -2.75679192753585 | -1.19382775620811 | 0.77786006848074  |
| H | -5.37751109393442 | 2.08083416830111  | 1.61592969250902  |
| H | -3.95536296739780 | 2.36442335191990  | 0.59038564207996  |

## 2C\_ee, Water

|   |                   |                   |                   |
|---|-------------------|-------------------|-------------------|
| C | -5.50387561576117 | 1.27192340902154  | -0.37958328198857 |
| C | -4.62653127105998 | 0.54726575232815  | -1.38343303424276 |
| C | -4.72127902367362 | 1.63504402073965  | 0.86844661391270  |
| C | -4.02545404592758 | 0.41012826060848  | 1.43178815055973  |
| C | -3.19785279079768 | -0.28641053029777 | 0.36746636817241  |

|   |                   |                   |                   |
|---|-------------------|-------------------|-------------------|
| N | -4.07903789500465 | -0.63273250556162 | -0.73521611180664 |
| H | -3.59280922662588 | -1.21024302101129 | -1.40715353765311 |
| H | -5.22181211176066 | 0.24475156328417  | -2.24398669115066 |
| H | -4.74395766611021 | -0.28860777232962 | 1.86308035990586  |
| F | -3.18015524897468 | 0.81517367692069  | 2.46653006650655  |
| H | -3.84724625419469 | 1.24497778806258  | -1.72367629361952 |
| F | -5.98092080837398 | 2.44708576531663  | -0.96314119340494 |
| H | -6.37467980769057 | 0.66141851085657  | -0.13571836330998 |
| H | -2.38685169095322 | 0.39265803092551  | 0.06574580338391  |
| H | -2.75679238950686 | -1.19383932685036 | 0.77784967836576  |
| H | -5.37749759122637 | 2.08085462041596  | 1.61592838025889  |
| H | -3.95528656235818 | 2.36435175757072  | 0.59029308611035  |

## 2C\_ea, Gas Phase

|   |                   |                   |                   |
|---|-------------------|-------------------|-------------------|
| C | -5.52029632184291 | 1.29199637861722  | -0.36454675994743 |
| C | -4.66823488379466 | 0.52340550938029  | -1.36486155081076 |
| C | -4.71085112280706 | 1.65378568834084  | 0.86892735784208  |
| C | -4.03514970987221 | 0.42599247502435  | 1.45502873369035  |
| C | -3.23565200608012 | -0.31188565410857 | 0.39038252417021  |
| N | -4.03938163636014 | -0.64082809561556 | -0.77115438475923 |
| H | -4.71442621170317 | -1.36548141008678 | -0.56511098363865 |
| H | -5.26823104538235 | 0.20227839443901  | -2.22224760877123 |
| H | -4.77603936257498 | -0.25261429922372 | 1.89033435331240  |
| F | -3.19140440221460 | 0.81800695043962  | 2.48055920418213  |
| H | -3.88449342760046 | 1.19327457381031  | -1.73223151094168 |
| F | -5.99418036231976 | 2.45235681530223  | -0.95298491568900 |
| H | -6.39358794222202 | 0.69058721075435  | -0.09138649664009 |
| H | -2.41179227379021 | 0.33456692336122  | 0.07212648714068  |
| H | -2.79831263452701 | -1.21987670050936 | 0.80421894439797  |
| H | -5.34542868499694 | 2.13263395682602  | 1.61459042260171  |
| H | -3.93487797191141 | 2.36539128324852  | 0.57421618386052  |

## 2C\_ea, Benzene

|   |                   |                   |                   |
|---|-------------------|-------------------|-------------------|
| C | -5.51820323467216 | 1.28675194324158  | -0.36352028835746 |
| C | -4.66572212337288 | 0.52461337390226  | -1.36663736488061 |
| C | -4.71031981934844 | 1.65337897019244  | 0.86833117996118  |
| C | -4.03761843390052 | 0.42331189997136  | 1.45050354748358  |
| C | -3.23281952918606 | -0.31074213013244 | 0.38887047282967  |
| N | -4.03880836650404 | -0.64318035918951 | -0.77271882570476 |
| H | -4.72637561318410 | -1.35207011088438 | -0.54877592755418 |
| H | -5.26755103017087 | 0.22141117245895  | -2.22264362878075 |
| H | -4.77607841262679 | -0.25510647766357 | 1.88680559877968  |
| F | -3.19121230279031 | 0.81679117896475  | 2.48206087837477  |
| H | -3.88083530063210 | 1.19493449643155  | -1.73045670876703 |
| F | -5.99565499411787 | 2.45238168893107  | -0.95396466504809 |
| H | -6.39166868926351 | 0.68718751942113  | -0.09233637850076 |
| H | -2.41163085237118 | 0.33844605841460  | 0.06961332375503  |
| H | -2.79714191793081 | -1.21877267845863 | 0.80420853678438  |
| H | -5.34733026519466 | 2.12867095153096  | 1.61427769179240  |
| H | -3.93336911473373 | 2.36358250286788  | 0.57224255783292  |

## 2C\_ea, Dichloromethane

|   |                   |                   |                   |
|---|-------------------|-------------------|-------------------|
| C | -5.51689414162327 | 1.28316062895566  | -0.36277211582572 |
| C | -4.66413456031432 | 0.52540959869702  | -1.36776479614883 |
| C | -4.71008970876996 | 1.65302548114031  | 0.86797321398721  |
| C | -4.03934859127441 | 0.42149222338483  | 1.44749763029345  |
| C | -3.23101200117738 | -0.31002874234431 | 0.38793707191417  |
| N | -4.03826281794196 | -0.64457483468921 | -0.77382009183812 |
| H | -4.73357911838721 | -1.34320612433080 | -0.53856607406558 |
| H | -5.26753700477383 | 0.22191526200360  | -2.22250799006878 |
| H | -4.77602220434234 | -0.25673857369712 | 1.88467415152357  |
| F | -3.19040688343034 | 0.81658928549614  | 2.48266487965691  |
| H | -3.87867679620545 | 1.19622721392310  | -1.72948002933405 |
| F | -5.99596162332389 | 2.45285858825536  | -0.95488308050765 |
| H | -6.39053691908115 | 0.68499434754153  | -0.09298895499301 |
| H | -2.41127291580094 | 0.34082384801516  | 0.06830126652129  |
| H | -2.79710239157532 | -1.21833081208692 | 0.80443032547480  |
| H | -5.34897857077301 | 2.12553185547724  | 1.61413259293276  |
| H | -3.93252375120522 | 2.36244075425841  | 0.57103200047753  |

## 2C\_ea, Chloroform

|   |                   |                   |                   |
|---|-------------------|-------------------|-------------------|
| C | -5.51726964964180 | 1.28423407139090  | -0.36299399151284 |
| C | -4.66459623672763 | 0.52517852859815  | -1.36743886026424 |
| C | -4.71012765487653 | 1.65315199991880  | 0.86807009997470  |
| C | -4.03883769775610 | 0.42203119245497  | 1.44838191845316  |
| C | -3.23153879797630 | -0.31023061145056 | 0.38820736116795  |
| N | -4.03842839614622 | -0.64416968681864 | -0.77349492021050 |
| H | -4.73149330216819 | -1.34581725041292 | -0.54153524473915 |
| H | -5.26751733851569 | 0.22177031650847  | -2.22257468519093 |
| H | -4.77608334061234 | -0.25624567119293 | 1.88525838816207  |
| F | -3.19073455741891 | 0.81655022264396  | 2.48254567486149  |
| H | -3.87929995228255 | 1.19583694509790  | -1.72976662549666 |
| F | -5.99596936165980 | 2.45265498283032  | -0.95458041145415 |
| H | -6.39083603344538 | 0.68562243844757  | -0.09276727739870 |
| H | -2.41139925994289 | 0.34014948806751  | 0.06867389689083  |
| H | -2.79704941309297 | -1.21843187774599 | 0.80434666434804  |
| H | -5.34842704673711 | 2.12653447537667  | 1.61416498330987  |
| H | -3.93273196099961 | 2.36277043628580  | 0.57136302909904  |

## 2C\_ea, DMSO

|   |                   |                   |                   |
|---|-------------------|-------------------|-------------------|
| C | -5.51653519234336 | 1.28211061837346  | -0.36254170161122 |
| C | -4.66369461430029 | 0.52564835274570  | -1.36807927637151 |
| C | -4.71005394275268 | 1.65291380629381  | 0.86787857391695  |
| C | -4.03985064905856 | 0.42097969482715  | 1.44662966910918  |
| C | -3.23050569276988 | -0.30985163892798 | 0.38769300768316  |
| N | -4.03805502677374 | -0.64493581199490 | -0.77416268587594 |
| H | -4.73550663731945 | -1.34068664218846 | -0.53579261879499 |
| H | -5.26761684393014 | 0.22199057999060  | -2.22238330007935 |
| H | -4.77598507399139 | -0.25718319276748 | 1.88409953603559  |
| F | -3.19004211515994 | 0.81665811403947  | 2.48276579091877  |
| H | -3.87812073067721 | 1.19665757640699  | -1.72924622116298 |
| F | -5.99592954429772 | 2.45308479920368  | -0.95518816550504 |
| H | -6.39024219505022 | 0.68437582712106  | -0.09317720611046 |
| H | -2.41110641439659 | 0.34143532114690  | 0.06800765115250  |
| H | -2.79724156853430 | -1.21828286620104 | 0.80454704821323  |
| H | -5.34952992394301 | 2.12453888826173  | 1.61410625486990  |
| H | -3.93232383470151 | 2.36213657366929  | 0.57070364361219  |

## 2C\_ea, Water

|   |                   |                   |                   |
|---|-------------------|-------------------|-------------------|
| C | -5.51650149305976 | 1.28199962183909  | -0.36251524032071 |
| C | -4.66364508644852 | 0.52567917312365  | -1.36811017457310 |
| C | -4.71004613932052 | 1.65290985850481  | 0.86786468475685  |
| C | -4.03990011807953 | 0.42093798799745  | 1.44653896932133  |
| C | -3.23046285485699 | -0.30984536551206 | 0.38767232417725  |
| N | -4.03803500866133 | -0.64496904242851 | -0.77420168747223 |
| H | -4.73570123896101 | -1.34043518358196 | -0.53553553961144 |
| H | -5.26761178995309 | 0.22201418077156  | -2.22237895523420 |
| H | -4.77598333385805 | -0.25721105384938 | 1.88404643947666  |
| F | -3.18998954391616 | 0.81668152888171  | 2.48276061692987  |
| H | -3.87805783804581 | 1.19671317616589  | -1.72920859516912 |
| F | -5.99595424506458 | 2.45309332197090  | -0.95521305579106 |
| H | -6.39019754800279 | 0.68428666186756  | -0.09318389131180 |
| H | -2.41108132163761 | 0.34147096410935  | 0.06798889577570  |
| H | -2.79728147892481 | -1.21829467648160 | 0.80456717248584  |
| H | -5.34958258401159 | 2.12443719698248  | 1.61410396191963  |
| H | -3.93230837719787 | 2.36212164963906  | 0.57066407099053  |

## 2C\_ea, Gas Phase

|   |                   |                   |                   |
|---|-------------------|-------------------|-------------------|
| C | -5.46864901899963 | 1.34280956478042  | -0.40679129644649 |
| C | -4.60832156410684 | 0.56553908537068  | -1.38954082453302 |
| C | -4.69682872413433 | 1.66519164675588  | 0.86295016261593  |
| C | -3.96269497657066 | 0.46439840594771  | 1.43842648021752  |
| C | -3.17910586617475 | -0.26742426736744 | 0.361264388644276 |
| N | -4.04351328445573 | -0.59892618650287 | -0.74772766904431 |
| H | -3.59081733226848 | -1.21120380750785 | -1.40862816301238 |
| H | -5.22798734227598 | 0.25300301495478  | -2.22921663228597 |
| F | -4.86214574630839 | -0.39912708702437 | 2.03136360124046  |
| H | -3.27468963791088 | 0.79413380994362  | 2.22113950811800  |
| H | -3.84166508560496 | 1.26280886351051  | -1.77173128273010 |
| H | -5.80419853070785 | 2.26975283246371  | -0.87895081772173 |
| F | -6.60110514495660 | 0.61564286464258  | -0.09847305230139 |
| H | -2.33657747891822 | 0.38575500967657  | 0.07227492626094  |
| H | -2.76624429910259 | -1.18159310244139 | 0.78616287313287  |

|   |                   |                  |                  |
|---|-------------------|------------------|------------------|
| H | -5.36444470217230 | 2.09234217483408 | 1.61095821020379 |
| H | -3.94946126533179 | 2.42484717796337 | 0.61466008978910 |

## 2C\_ae, Benzene

|   |                   |                   |                   |
|---|-------------------|-------------------|-------------------|
| C | -5.46439255775694 | 1.34535832473735  | -0.40671275322651 |
| C | -4.61023184393360 | 0.56334553600526  | -1.38769882036572 |
| C | -4.69554225973040 | 1.66712316447256  | 0.86278249278815  |
| C | -3.96038283438289 | 0.46818011975203  | 1.43599009533764  |
| C | -3.18218857803336 | -0.26905210926166 | 0.36166104823553  |
| N | -4.05277876605705 | -0.60869071312082 | -0.74485761683743 |
| H | -3.57713937925811 | -1.19719060270970 | -1.41328614192904 |
| H | -5.22710252859813 | 0.25665861801061  | -2.23157904938558 |
| F | -4.86924471004176 | -0.40008052942405 | 2.02923106197003  |
| H | -3.27697160946813 | 0.79201517188640  | 2.22308829831781  |
| H | -3.83674951225228 | 1.25373743341914  | -1.76376018847557 |
| H | -5.80757595603087 | 2.26806438064282  | -0.87815785822369 |
| F | -6.60170009067343 | 0.61069224960866  | -0.09251794492482 |
| H | -2.34561606053857 | 0.38458457148100  | 0.06300246488328  |
| H | -2.76279577520660 | -1.17977152358182 | 0.78756216282761  |
| H | -5.36074332397643 | 2.098407773151339 | 1.61073147333632  |
| H | -3.94729421406144 | 2.42456817656880  | 0.61264127567198  |

## 2C\_ae, Dichloromethane

|   |                   |                   |                   |
|---|-------------------|-------------------|-------------------|
| C | -5.46111874798367 | 1.34717959911930  | -0.40648056653742 |
| C | -4.61194084053932 | 0.56161894156810  | -1.38618946431549 |
| C | -4.69436067754171 | 1.66859640504294  | 0.86253084551292  |
| C | -3.95884792202140 | 0.47099988603385  | 1.43405278529819  |
| C | -3.18462835946160 | -0.27030045279495 | 0.36216494233936  |
| N | -4.05947393747324 | -0.61630709937325 | -0.74298036501391 |
| H | -3.56568536458626 | -1.18500071573587 | -1.41691671032900 |
| H | -5.22680507848738 | 0.25954743654359  | -2.23324188519909 |
| F | -4.87564829746739 | -0.40104953488782 | 2.02727413999243  |
| H | -3.27892389311733 | 0.79014927408695  | 2.22463301113709  |
| H | -3.83341581115214 | 1.24641687226924  | -1.75785686767738 |
| H | -5.81013647102105 | 2.26662108685726  | -0.87757945188468 |
| F | -6.60240712815739 | 0.60646122691206  | -0.08731282970524 |
| H | -2.35271523774442 | 0.38339947604091  | 0.05607553610680  |
| H | -2.76001568966378 | -1.17823572963299 | 0.78891211294049  |
| H | -5.35717863588864 | 2.10389312914397  | 1.61040809704872  |
| H | -3.94514790769326 | 2.42396017880671  | 0.61062667028620  |

## 2C\_ae, Chloroform

|   |                   |                   |                   |
|---|-------------------|-------------------|-------------------|
| C | -5.46220559298154 | 1.34657111867558  | -0.40654185727484 |
| C | -4.61136029314284 | 0.56224659388274  | -1.38667709496017 |
| C | -4.69474108213754 | 1.66815573288163  | 0.86258412182417  |
| C | -3.95929334896749 | 0.47016517228390  | 1.43465220983419  |
| C | -3.18388172206903 | -0.26996009904369 | 0.36202196379200  |
| N | -4.05739613911102 | -0.61386581273181 | -0.74357661736488 |
| H | -3.56927973535162 | -1.18882556498597 | -1.41584845528196 |
| H | -5.22678276430987 | 0.25873101815745  | -2.23278863028397 |
| F | -4.87357721400502 | -0.40064089964621 | 2.02797353718214  |
| H | -3.27826169902029 | 0.79079501997043  | 2.22411145819034  |
| H | -3.83440649632615 | 1.24885854641081  | -1.75961025007106 |
| H | -5.80956444025038 | 2.26699237812385  | -0.87768913372372 |
| F | -6.60214133862827 | 0.60758978888032  | -0.08896384754281 |
| H | -2.35038772808573 | 0.38360251552426  | 0.05830904454741  |
| H | -2.76109272467997 | -1.17884780029905 | 0.78852393452616  |
| H | -5.35823556567873 | 2.10224058039943  | 1.61051998846090  |
| H | -3.94584211525448 | 2.42414171151632  | 0.61111962814605  |

## 2C\_ae, DMSO

|   |                   |                   |                   |
|---|-------------------|-------------------|-------------------|
| C | -5.46004027019351 | 1.34777867355927  | -0.40641571489547 |
| C | -4.61251902954012 | 0.56103628719522  | -1.38571129330893 |
| C | -4.69400634613466 | 1.66900110432919  | 0.86246067890706  |
| C | -3.95840569896533 | 0.47184055860035  | 1.43345235729899  |
| C | -3.18542556330307 | -0.27066624967589 | 0.36233736930076  |
| N | -4.06153138823021 | -0.61873332392544 | -0.74243295959256 |
| H | -3.56198884779411 | -1.18100172580365 | -1.41799171472435 |
| H | -5.22679225566405 | 0.26042402071247  | -2.23373440248253 |
| F | -4.87770299064433 | -0.40152357496240 | 2.02673385879590  |

|   |                   |                   |                   |
|---|-------------------|-------------------|-------------------|
| H | -3.27956040382336 | 0.78955914765111  | 2.22511274729180  |
| H | -3.83241571605442 | 1.24399978588185  | -1.75607823276059 |
| H | -5.81081807041723 | 2.26622022414151  | -0.87742817415050 |
| F | -6.60271891396875 | 0.60523869311871  | -0.08567783266853 |
| H | -2.35505196408278 | 0.38309940746269  | 0.05388119195263  |
| H | -2.75903052027168 | -1.17766493777992 | 0.78933534372721  |
| H | -5.35601997899488 | 2.10569005902390  | 1.61028598710446  |
| H | -3.94442204191750 | 2.42365185047103  | 0.60999079020464  |

## 2C\_ae, Water

|   |                   |                   |                   |
|---|-------------------|-------------------|-------------------|
| C | -5.45993249280236 | 1.34783686642345  | -0.40640514825838 |
| C | -4.61257980711865 | 0.56098058381510  | -1.38566234263010 |
| C | -4.69396733572226 | 1.66904319114459  | 0.86245259561969  |
| C | -3.95836388654853 | 0.47192673766521  | 1.43339117915640  |
| C | -3.18550583932160 | -0.27070293067385 | 0.36235795537508  |
| N | -4.06173158231671 | -0.61897462827648 | -0.74238226174388 |
| H | -3.56160380748831 | -1.18058455073661 | -1.41810373642803 |
| H | -5.22679640702132 | 0.26051154642143  | -2.23378055714447 |
| F | -4.87792931015846 | -0.40157404886008 | 2.02666386186224  |
| H | -3.27963254749988 | 0.78949642050920  | 2.22516609789910  |
| H | -3.83232824344453 | 1.24376602694029  | -1.75590320943079 |
| H | -5.81089339820544 | 2.26617464320464  | -0.87740869459709 |
| F | -6.60274962919578 | 0.60509127371764  | -0.08550095290298 |
| H | -2.35528263851782 | 0.38306604852518  | 0.05367500606067  |
| H | -2.75893563683110 | -1.17760999946924 | 0.78938045546564  |
| H | -5.35588515546222 | 2.10589783689436  | 1.6102702732888   |
| H | -3.94433228234499 | 2.42360498320515  | 0.60990947796799  |

## 2C\_aa, Gas Phase

|   |                   |                   |                   |
|---|-------------------|-------------------|-------------------|
| C | -5.47097876137534 | 1.35771671578347  | -0.39663164729345 |
| C | -4.63460383930349 | 0.54303454124519  | -1.37071885329626 |
| C | -4.69058217197634 | 1.68479067543584  | 0.86718312345597  |
| C | -3.96596976609201 | 0.47994958112550  | 1.44734913392088  |
| C | -3.21237294815964 | -0.28593665344622 | 0.37154688212730  |
| N | -4.04077668764428 | -0.63324317080895 | -0.76627576894878 |
| H | -4.77106491100667 | -1.27196299251279 | -0.47406919915161 |
| H | -5.25310156175406 | 0.24503545557483  | -2.21705299073057 |
| F | -4.88895919559416 | -0.38279835869285 | 2.02327504239555  |
| H | -3.28585197591205 | 0.79500246653540  | 2.24241018943031  |
| H | -3.83090213298100 | 1.17825599172031  | -1.75861464355216 |
| H | -5.82559776009204 | 2.27650927485691  | -0.86995914324974 |
| F | -6.59544290824683 | 0.61283575472061  | -0.06694387285313 |
| H | -2.37940218688341 | 0.33231849748434  | 0.01968882817908  |
| H | -2.78755609550398 | -1.19195025862910 | 0.80313779726300  |
| H | -5.35303574666132 | 2.12034202805009  | 1.61504972809058  |
| H | -3.93906135081340 | 2.43809045155742  | 0.61237539421301  |

## 2C\_aa, Benzene

|   |                   |                   |                   |
|---|-------------------|-------------------|-------------------|
| C | -5.46777304438783 | 1.35886508416814  | -0.39708363107202 |
| C | -4.63561572516229 | 0.54333632105251  | -1.37177151685213 |
| C | -4.69016478862913 | 1.68436225410914  | 0.86664205708816  |
| C | -3.96409810867657 | 0.48190457110385  | 1.44509850182922  |
| C | -3.21148846825846 | -0.28658526449046 | 0.37257294590398  |
| N | -4.03891400629750 | -0.63502795881056 | -0.76859349012683 |
| H | -4.76917185548015 | -1.27451384488099 | -0.47664504209218 |
| H | -5.25533039085124 | 0.24622055432909  | -2.21749832172931 |
| F | -4.89287822797768 | -0.38408634986696 | 2.02481826103629  |
| H | -3.28610886631391 | 0.79412620171948  | 2.24140358021733  |
| H | -3.83412859386410 | 1.18161311500981  | -1.75771276218481 |
| H | -5.82490066329782 | 2.27530679399864  | -0.87020397731231 |
| F | -6.59881790977794 | 0.61141689769341  | -0.06420801828766 |
| H | -2.37960442175684 | 0.33398955193962  | 0.02395965657417  |
| H | -2.78724836685398 | -1.19206242208324 | 0.80578078866336  |
| H | -5.35080958826064 | 2.12296116460196  | 1.61447894732336  |
| H | -3.93820697415394 | 2.43616333040658  | 0.61071202102137  |

## 2C\_aa, Dichloromethane

|   |                   |                  |                   |
|---|-------------------|------------------|-------------------|
| C | -5.46520553534589 | 1.35962664112304 | -0.39763325799476 |
| C | -4.63592327646742 | 0.54354653338833 | -1.37258148073794 |
| C | -4.68995847733703 | 1.68377920727759 | 0.86618211581836  |

|   |                    |                   |                   |
|---|--------------------|-------------------|-------------------|
| C | -3.96246759703109  | 0.48330502765411  | 1.44323102707051  |
| C | -3.21073499206070  | -0.28697772621433 | 0.37295537946078  |
| N | -4.03856035797748  | -0.63683115330604 | -0.76973427825253 |
| H | -4.770188699113780 | -1.27421089480239 | -0.47562956491596 |
| H | -5.25607272242558  | 0.24788916303702  | -2.21851586371766 |
| F | -4.89550422637730  | -0.38588554160999 | 2.02531983810379  |
| H | -3.28623033986445  | 0.79331857424520  | 2.24071551914669  |
| H | -3.83528789686134  | 1.18348505627119  | -1.75630138942207 |
| H | -5.82464253974548  | 2.27426487763406  | -0.87048847473604 |
| F | -6.60095645088947  | 0.60929627716916  | -0.06279948061421 |
| H | -2.38024755556263  | 0.33545264119371  | 0.02573083002949  |
| H | -2.78600541373449  | -1.19162754547630 | 0.80743026456367  |
| H | -5.34926937002355  | 2.12458308279368  | 1.61399802496525  |
| H | -3.93800454915829  | 2.43497577962195  | 0.60987079123262  |

### 3A\_a, Gas Phase

|   |                   |                   |                   |
|---|-------------------|-------------------|-------------------|
| C | -5.44550366907381 | 1.19405138930101  | 0.31043872632505  |
| C | -5.04685627196144 | 0.62204667287035  | -1.04003493234303 |
| C | -4.24381475719489 | 1.73442572257075  | 1.07359974559617  |
| C | -3.17608116294713 | 0.64684566895216  | 1.17025990220926  |
| C | -2.80996938068274 | 0.11121088568718  | -0.20689680939594 |
| N | -3.99784740011896 | -0.36954484238437 | -0.88804153733569 |
| C | -4.22561245533360 | -1.62129288333338 | -1.33397984798902 |
| O | -5.21707289229398 | -1.97559148041885 | -1.91714388261915 |
| C | -3.12530113730883 | -2.68496977442765 | -1.07398402400711 |
| F | -2.86514550901390 | -2.81265970828823 | 0.23353401690606  |
| F | -1.97869959906623 | -2.36815585459636 | -1.69036327515819 |
| F | -3.51868368051075 | -3.85710403711291 | -1.52685605893651 |
| H | -5.89986311520877 | 0.15593235422599  | -1.52382172899033 |
| H | -4.68715295270579 | 1.44103705409058  | -1.67216805790719 |
| H | -2.37549898684093 | 0.91280084684762  | -0.81458403945809 |
| H | -2.06993018231161 | -0.67588380253113 | -0.13281302376129 |
| H | -6.19322702298796 | 1.97862286499567  | 0.16627504422356  |
| F | -6.04385406056683 | 0.18887523748600  | 1.05421027781911  |
| C | -4.63782074415546 | 2.27967464905873  | 2.43699558267764  |
| H | -3.84309615488841 | 2.55475573782889  | 0.46589452048767  |
| H | -3.55167028597961 | -0.17525425345962 | 1.78423815772100  |
| H | -2.28317816711490 | 1.04301915620376  | 1.65564776290330  |
| H | -5.09925025397934 | 1.49893510211888  | 3.04114830953922  |
| H | -5.34858597527976 | 3.10175902183297  | 2.34325553198612  |
| H | -3.76131418247433 | 2.64950427248198  | 2.96956963945247  |

### 2C\_aa, Chloroform

|   |                   |                   |                   |
|---|-------------------|-------------------|-------------------|
| C | -5.46601214110836 | 1.35938947187791  | -0.39745296883172 |
| C | -4.63583850322406 | 0.54348424744816  | -1.37233035580435 |
| C | -4.69001474239001 | 1.68398296520803  | 0.86631926238760  |
| C | -3.96296352104884 | 0.48289411607800  | 1.44381016804623  |
| C | -3.21096915863582 | -0.28687208983384 | 0.37284941954897  |
| N | -4.03861821647611 | -0.63624637106262 | -0.76941588028284 |
| H | -4.76976081367094 | -1.27441057952074 | -0.47609602992213 |
| H | -5.25586602890670 | 0.24739942050209  | -2.21819077004609 |
| F | -4.89467162722507 | -0.38524839949929 | 2.02522558666411  |
| H | -3.28618877845459 | 0.79356062995807  | 2.24093725805081  |
| H | -3.83496781964096 | 1.18293608358104  | -1.75675444963487 |
| H | -5.82478891210774 | 2.27454953504838  | -0.87040374000833 |
| F | -6.60030080117749 | 0.60999437319739  | -0.06319570677455 |
| H | -2.37999168095207 | 0.33493197717432  | 0.02523745041512  |
| H | -2.78648891072748 | -1.19181039594128 | 0.80695605886132  |
| H | -5.34974693245203 | 2.12408790038518  | 1.61414599565263  |
| H | -3.93807141180176 | 2.43536711539920  | 0.61010870167804  |

### 3A\_a, Chloroform

|   |                   |                   |                   |
|---|-------------------|-------------------|-------------------|
| C | -5.44369926350448 | 1.20473772468360  | 0.29982514496613  |
| C | -5.04227857728837 | 0.62967471046749  | -1.04640457190754 |
| C | -4.24608460734149 | 1.73069695128229  | 1.07490769293952  |
| C | -3.17646668648884 | 0.64488650494288  | 1.16857402569450  |
| C | -2.80850958406874 | 0.11204771956569  | -0.20855549639792 |
| N | -4.00173408971383 | -0.37525681825940 | -0.88570670158305 |
| C | -4.23011205294670 | -1.62102856829969 | -1.31060384622281 |
| O | -5.23647286475803 | -1.99720046343221 | -1.87210811714619 |
| C | -3.12051355073061 | -2.68047438312251 | -1.07057651347274 |
| F | -2.84579356509507 | -2.82228900670422 | 0.23052306345731  |
| F | -1.98440275851261 | -2.36502530486500 | -1.70126839072878 |
| F | -3.52019522620571 | -3.85483300145713 | -1.52767613633381 |
| H | -5.89874890757976 | 0.18167881438033  | -1.53907749329057 |
| H | -4.66127783982986 | 1.44267488406451  | -1.67052827421374 |
| H | -2.38727530269959 | 0.91458232498729  | -0.82081018178616 |
| H | -2.06293736535796 | -0.66963933187021 | -0.13508418803810 |
| H | -6.18522705950115 | 1.99198044228410  | 0.15119680137691  |
| F | -6.06366747685681 | 0.19376825199481  | 1.03652645734538  |
| C | -4.64188620575039 | 2.2705107166156   | 2.44023536600564  |
| H | -3.84438509942719 | 2.55438001258944  | 0.47391683611339  |
| H | -3.54399572016363 | -0.17864612428929 | 1.78621582034447  |
| H | -2.28264542695161 | 1.04522897489590  | 1.64778470273258  |
| H | -5.08662429555244 | 1.48486229170224  | 3.05140932500246  |
| H | -5.36429679929947 | 3.08258254031724  | 2.34702590740840  |
| H | -3.76579967437562 | 2.65314014151671  | 2.96463876773472  |

### 2C\_aa, DMSO

|   |                   |                   |                   |
|---|-------------------|-------------------|-------------------|
| C | -5.46439247906829 | 1.35984366625463  | -0.39782925126125 |
| C | -4.63596882557855 | 0.54360517257920  | -1.37282478146162 |
| C | -4.68992592098310 | 1.68354943964797  | 0.86604032083576  |
| C | -3.96194036361992 | 0.48372443625954  | 1.44263057868435  |
| C | -3.21050816077213 | -0.28708741216648 | 0.37302932788367  |
| N | -4.03861616019593 | -0.63747933583294 | -0.77000138340918 |
| H | -4.77084646297320 | -1.27385246122004 | -0.47492488139842 |
| H | -5.25615000341853 | 0.24853532746011  | -2.21894935280358 |
| F | -4.89628580999275 | -0.38658190428950 | 2.02541283352613  |
| H | -3.2862267509678  | 0.79310886420153  | 2.24045302409097  |
| H | -3.83546905054819 | 1.18397780635711  | -1.75570910757643 |
| H | -5.82451954260211 | 2.27395448045653  | -0.87058389706051 |
| F | -6.60159592812922 | 0.60847869678724  | -0.06245545556035 |
| H | -2.38056502742843 | 0.33597936442505  | 0.02609012227734  |
| H | -2.78544700741062 | -1.19140807557725 | 0.80788066908326  |
| H | -5.34881555940755 | 2.12504428604724  | 1.61384841464013  |
| H | -3.93799102277472 | 2.43459760233146  | 0.60964281950971  |

### 3A\_e, Gas Phase

|   |                   |                   |                   |
|---|-------------------|-------------------|-------------------|
| C | -5.46994851404299 | 0.99172527944880  | 0.12346310123420  |
| C | -4.84204739255304 | 0.673937575608984 | -1.22779824263646 |
| C | -4.68304536680214 | 1.51622872570905  | 1.12724398864466  |
| C | -3.28323391945578 | 0.51964996514373  | 1.20785510429205  |
| C | -2.71006306441073 | 0.16506614939735  | -0.16067110652153 |
| N | -3.77113216399183 | -0.28952678390241 | -1.04538969195185 |
| C | -3.73532965781814 | -1.55146138128899 | -1.51935478576539 |
| O | -2.87301966293352 | -2.35559494819704 | -1.27631101282645 |
| C | -4.88817675729607 | -1.9942696312596  | -2.46252639870861 |
| F | -4.96682136647462 | -1.21379158691013 | -3.54646699913479 |
| F | -6.07477424709121 | -1.95197439660728 | -1.83944681542055 |
| F | -4.68797026880929 | -3.23188735998188 | -2.86635153689283 |
| H | -5.58730815750376 | 0.29115756614045  | -1.91374787069945 |
| H | -4.41600887406090 | 1.57233206138346  | -1.68147297447353 |
| H | -2.23282725050876 | 1.04847799368545  | -0.59258716433533 |
| H | -1.96639848877443 | -0.61985687408384 | -0.06443115341360 |
| H | -6.26194590666363 | 1.73062723421934  | -0.00581529410191 |
| H | -5.93391230973492 | 0.07747763518487  | 0.50255457405351  |
| H | -4.90490018835421 | 1.55227846690390  | 2.11337272844201  |

### 2C\_aa, Water

|   |                   |                    |                   |
|---|-------------------|--------------------|-------------------|
| C | -5.46430692299968 | 1.35986713244674   | -0.39784980690490 |
| C | -4.63597388539530 | 0.54360915434876   | -1.37284966212548 |
| C | -4.68992190006056 | 1.68352444358749   | 0.86602646239047  |
| C | -3.96188761778667 | 0.48376542467832   | 1.44256990587170  |
| C | -3.21048316884901 | -0.28709579934326  | 0.37303626315685  |
| N | -4.03862263056502 | -0.637547111374317 | -0.77002633821113 |
| H | -4.77091706271226 | -1.27381134446317  | -0.47484452359344 |
| H | -5.25616277405936 | 0.24859491589981   | -2.21898866859041 |
| F | -4.89636890192033 | -0.38666009484451  | 2.02541343708077  |
| H | -3.28622791319158 | 0.79308231508512   | 2.24043263293871  |
| H | -3.83548832404133 | 1.18402361037222   | -1.75565356025700 |
| H | -5.82449983105839 | 2.27392640223133   | -0.87059396484236 |
| F | -6.60166241395646 | 0.60839983216940   | -0.06242293333182 |
| H | -2.38060084133402 | 0.33604117255232   | 0.02612290922549  |
| H | -2.78537915825812 | -1.19137997446135  | 0.80792358438542  |
| H | -5.34876871825141 | 2.12509218538056   | 1.61383199376853  |
| H | -3.93798793556052 | 2.43455773810340   | 0.60962226903856  |

C -3.96205267592196 2.92479909336236 0.78355682668994  
H -3.62131981697559 -0.39679048008015 1.699118987004476  
F -2.25708594883053 1.04717009911502 1.97482522323784  
H -3.44271679292122 2.96965933604965 -0.17390334750346  
H -3.28131990615917 3.29873266537245 1.54539883515068  
H -4.81699130193155 3.59928974697194 0.72752502556011

H -2.76190905732408 -1.27634850053656 0.74877398651782  
C -5.47347154565038 2.39772683924557 1.83557170194924  
H -3.83380091750239 2.32794295344123 0.46056399671348  
H -6.29399369973183 1.77112607873121 2.18621480841330  
H -5.89409690654699 3.30864682400015 1.40795805791729  
H -4.86685099869885 2.67552616622527 2.69772893003406

### 3A\_e, Chloroform

C -5.47161901511679 0.99504143246315 0.13941084967410  
C -4.85328388888580 0.66208441065391 -1.21146084602758  
C -4.43289150098280 1.52841889974662 1.13329597215757  
C -3.29325354077765 0.52122690448020 1.21782904475985  
C -2.71957423267388 0.15359726404186 -0.14665844795617  
N -3.78559416935728 -0.31053309341892 -1.02389900578815  
C -3.73088383773239 -1.54500186964658 -1.53440080941166  
O -2.84830388059121 -2.34982239316038 -1.32945469185661  
C -4.88366223746635 -1.98820835034600 -2.47841054491649  
F -4.97279796910409 -1.20168173466550 -3.55558970597640  
F -6.06869594930127 -1.97522160072461 -1.85773955166766  
F -4.66491457990948 -3.22220918782207 -2.89908426787899  
H -5.60580313837089 0.28017353004706 -1.88954311765195  
H -4.41716181015677 1.54991631157020 -1.67406995034836  
H -2.24918682877707 1.03191552107346 -0.59474462448687  
H -1.97350393994786 -0.62689244690553 -0.03989779723189  
H -6.25924606053761 1.73624416261477 0.00154242741446  
H -5.93669852333714 0.08844152973031 0.53452035951182  
H -4.90091533727588 1.57596350203996 2.11898213833468  
C -3.95283450128237 2.93033613649995 0.77033516263194  
H -3.63577580826556 -0.38547341166631 1.72088936994895  
F -2.25120129299318 1.03936188104398 1.98053043730467  
H -3.42325526765649 2.95814094349204 -0.18230390472274  
H -3.28327018389972 3.32031639554312 1.53488686725085  
H -4.80902250560045 3.60128526331530 0.69367463693266

### 3B\_e, Gas Phase

C -5.48217838190564 1.17833932163102 -0.45670607257811  
C -4.64392435994611 0.44290898196898 -1.48336585515496  
C -4.68425574364962 1.56888309494579 0.79496358552282  
C -4.02799265783078 0.31614120162283 1.36670457170543  
C -3.20073098124849 -0.44522904717976 0.33343503189042  
N -4.05830619027624 -0.78776451272256 -0.84503556370683  
H -3.51190893451024 -1.31386274836910 -1.52805133506126  
H -4.82146546982430 -1.40093677064449 -0.54702129235142  
H -5.22861474988706 0.12233497811855 -2.34215959572921  
H -4.79833467595441 -0.34872606633500 1.77410541846443  
F -3.16846810567232 0.62670353025617 2.38390326918406  
H -3.80002572390437 1.03666157874816 -1.83078285341724  
H -2.38051175654914 0.17084727631649 -0.03080273151909  
H -2.80357524581453 -1.36500045131837 0.75519647353925  
H -5.39703898328103 1.92192249337294 1.54232779701612  
C -3.68502005704523 2.69052166052091 0.53614262148349  
H -6.34401858897639 0.5599514402409 -0.18804235288322  
H -5.88491207285102 2.07509098888080 -0.92808385068472  
H -2.93230989293583 2.43610367564103 -0.21174714719746  
H -3.16207398312057 2.95314028826371 1.45311775819513  
H -4.21010344481666 3.57849538225780 0.18557212328237

### 3B\_a, Gas Phase

C -5.42993332401969 1.27050777479790 -0.42109681956800  
C -4.57933056537978 0.56353824852171 -1.45975585950983  
C -4.62229783471579 1.66783935907157 0.80558460347840  
C -3.96016575166890 0.42054964612499 1.39417925295590  
C -3.15949221423096 -0.3519113025992 0.36403645571518  
N -4.03188843702179 -0.67300157313922 -0.81945813267207  
H -3.51574860241020 -1.22744426467661 -1.50196901726643  
H -4.82982810121469 -1.23493792208458 -0.50669733305933  
H -5.16897357885616 0.26731148837323 -2.32345457008424  
H -4.72614377888516 -0.22439417251289 1.83200405728748  
H -3.28836701997459 0.70183911258333 2.20489754823579  
H -3.73971900607031 1.18034439606406 -1.77543579638831  
H -5.92600442739999 2.13140462100280 -0.86999015318988  
F -6.40551201571051 0.35201371652500 -0.05243346058851  
H -2.32614746368784 0.23279040925678 -0.02306425871710  
H -2.78112282991039 -1.29416657830626 0.75531464306293  
C -5.48048956876374 2.39339660612288 1.83171006973522  
H -3.84064480685120 2.35104762979825 0.45477102910969  
H -6.31018934269652 1.76786448377467 2.15959860529631  
H -5.89033112473104 3.31429270120813 1.41741387568128  
H -4.88821020580075 2.65790544775419 2.70697526048551

### 3B\_e, Water

C -5.48032590328183 1.18146509215347 -0.45036768207273  
C -4.64361230532196 0.44029789211908 -1.47369301028507  
C -4.68301548584132 1.57365471473723 0.80018324020721  
C -4.03891402873951 0.31262970872776 1.35679468683656  
C -3.20570588427502 -0.43757615473718 0.32883333412891  
N -4.05319650336552 -0.77683622283657 -0.84257682377578  
H -3.49618313543653 -1.28763911211117 -1.52748604537598  
H -4.80181804273951 -1.41298919694937 -0.56021190971693  
H -5.23806448331125 0.110422463746066 -2.32026645448759  
H -4.81182864558465 -0.35124258036257 1.75107809143053  
F -3.18787430468499 0.61818818730368 2.40918738623420  
H -3.80744317098898 1.03365481414859 -1.83794482230889  
H -2.38367253183788 0.17637862897771 -0.03297418621403  
H -2.81565612509748 -1.36062945505981 0.74662665799525  
H -5.39385898752156 1.92898358176796 1.54845998130086  
C -3.6783114369619 2.68839096004206 0.53224145087579  
H -6.33130593175118 0.55563670534725 -0.17105474339759  
H -5.88434643829103 2.07661731768570 -0.92268873297183  
H -2.93281294672146 2.41489957670473 -0.21507698334609  
H -3.15304662965084 2.96131139274250 1.44610492911419  
H -4.20477737186129 3.57094951213827 0.16850163582895

### 3B\_a, Water

C -5.42961002696303 1.28560794127629 -0.42289934209994  
C -4.60255926837565 0.53641299971704 -1.44279906055647  
C -4.62600571603250 1.65868183484938 0.81135668790776  
C -3.97747680354756 0.40488625028830 1.39542226982493  
C -3.15773069171595 -0.34192985035938 0.36299631829201  
N -4.01107511486179 -0.67471447162848 -0.81544807056410  
H -3.46216694388976 -1.18161573532329 -1.50908435583764  
H -4.76122146855643 -1.30674090510520 -0.52834526899418  
H -5.20679014971246 0.21761053325437 -2.28666377401970  
H -4.74947609947422 -0.25466526232430 1.79960246247252  
H -3.32146906394580 0.67663876691606 2.22207161629635  
H -3.78255498701746 1.16000104241456 -1.79332165323963  
H -5.86499630887534 2.16743588481677 -0.89222151628684  
F -6.48449392262340 0.44503484216286 -0.04969370231058  
H -2.33879030895413 0.26824576794087 -0.01465409242968

### 3C\_ae, Gas Phase

C -5.43273054528343 1.27508614414173 -0.42583579207112  
C -4.58737989178118 0.50369992433671 -1.4251192822128  
C -4.62570549239145 1.64643764571937 0.81145730417821  
C -3.97643674972745 0.38958359124345 1.38723726046660  
C -3.14728402263557 -0.32344273123004 0.32711231727972  
N -3.99324588189967 -0.65962600722665 -0.80290843199519  
H -3.49825800105744 -1.21862887510547 -1.48220651257219  
H -5.21632446012142 0.18670984922063 -2.25689397806749  
H -4.75852990191162 -0.28464036535231 -1.74392069741675  
H -3.34874176839948 0.65458461046276 2.24032095739376  
H -3.83778307352100 1.21315215319649 -1.81678134884713  
H -5.82980255526458 2.175906764529206 -0.90243887933864  
F -6.52614288761513 0.50821696437768 -0.04945599052877  
H -2.30461914169936 0.32867966431813 0.03962463640245  
H -2.72759031521113 -1.24384053002391 0.73331431501944  
C -5.46537738075097 2.39661402492682 1.83359299437116  
H -3.82610129568476 2.30900968434612 0.45860413823267  
H -6.29790053156176 1.78010441296871 2.17207125214579  
H -5.87448970237891 3.31533022757170 1.40978890602288

H -4.86395640110369 2.66454286951601 2.70308545271236

### 3C\_ae, Water

C -5.42480750960847 1.28212819555003 -0.43094781088892  
 C -4.58562956280895 0.50419108858681 -1.42465473934977  
 C -4.62985371832592 1.64452392787015 0.81307805399887  
 C -3.97534228598678 0.39054714954397 1.38984588478239  
 C -3.15793500227226 -0.33161006697156 0.32759125339593  
 N -4.01275546869977 -0.67694855388592 -0.80115373778127  
 H -3.48545853626173 -1.19875695063607 -1.48904539322007  
 H -5.20542638738694 0.20444201667982 -2.26964859031762  
 H -4.75066176397754 -0.27978740614924 1.77128958210396  
 H -3.33534370723925 0.66439726540043 2.23065266724861  
 H -3.81764021791224 1.19888042353649 -1.79855621391012  
 H -5.82700493289081 2.17925519331000 -0.90508948957409  
 F -6.53303565615856 0.503748879878935 -0.06027034599257  
 H -2.32397550719620 0.31898095237658 0.02082014332047  
 H -2.73070864532139 -1.24793021532323 0.73477508459600  
 C -5.46939315772850 2.39517886280264 1.83533011915044  
 H -3.83220481707878 2.30881899172346 0.46182679102827  
 H -6.28942610527844 1.77340289603948 2.19652548936699  
 H -5.89328304854553 3.30345080105538 1.40332827585521  
 H -4.85851396932194 2.68056662970142 2.69279297618727

### 3C\_aa, Gas Phase

C -5.43512653895797 1.28716503891701 -0.41865075640972  
 C -4.60059379971269 0.49761084283159 -1.41435286608239  
 C -4.62605237816426 1.66360445568851 0.81506669827867  
 C -3.97174938701846 0.41320318231285 1.40292368615557  
 C -3.19406746821431 -0.35496124317561 0.33591637592508  
 N -3.99120775664469 -0.68316956110784 -0.83593219269018  
 H -4.71606408850765 -1.34552697058413 -0.58705343635762  
 H -5.21745305479158 0.20805593490653 -2.26512988043259  
 H -4.75202754862820 -0.23255083069261 1.81627954701119  
 H -3.31367018854803 0.69385407277780 2.22870885286405  
 H -3.80685407996603 1.15128417958178 -1.79150238351593  
 H -5.86414079201468 2.17807794199165 -0.88550496065276  
 F -6.50720603020997 0.48197058895662 -0.02951801244121  
 H -2.34630085172088 0.25109774945562 -0.00251555042556  
 H -2.77958757503326 -1.27592260920923 0.7462433111640  
 C -5.47225899989343 2.40571804355601 1.83740681878105  
 H -3.83085181039791 2.33022095584827 0.45954518377774  
 H -6.30176458677099 1.77952441384137 2.16614611238155  
 H -5.88596091491489 3.32396516267443 1.41773392198506  
 H -4.87717214989013 2.66901865142939 2.71243951073159

### 3C\_aa, Water

C -5.42593561576171 1.29646073798278 -0.42565985903771  
 C -4.60083097374252 0.49518107824316 -1.41640593860953  
 C -4.62751868295063 1.65941257476311 0.81589976923416  
 C -3.97208200310026 0.40886895693149 1.40130243482023  
 C -3.18917174395717 -0.35326843798394 0.33613519462122  
 N -3.99429565689742 -0.69128647308755 -0.83375658298782  
 H -4.72797325002941 -1.33584205299921 -0.55923478491788  
 H -5.22258678383465 0.20784969795237 -2.26453869148822  
 H -4.74728910413506 -0.24464565326865 1.81320309640683  
 H -3.31417796813334 0.69096508555807 2.22637299451561  
 H -3.80645532180466 1.14622362415130 -1.79425857212470  
 H -5.84066930295810 2.18985406449762 -0.89667806684768  
 F -6.52461222635328 0.50201248805689 -0.04618944214177  
 H -2.35038424437981 0.26179579107095 -0.00665726262777  
 H -2.76954062920548 -1.27050650031459 0.74944127679323  
 C -5.47530709829161 2.39909463877786 1.83921852158083  
 H -3.83286010309474 2.32836596025615 0.46581723625584  
 H -6.29128163458974 1.76520049938335 2.18870912446290  
 H -5.90539481017395 3.30665914734945 1.41234345489977  
 H -4.87174284660644 2.67984477267940 2.70318609719245

### 3C\_ee, Gas Phase

C -5.47320797736719 1.18593996695423 -0.46722318685084  
 C -4.61478815024316 0.41997047428984 -1.46649687256561  
 C -4.68671338317045 1.56684163253868 0.7947133927986  
 C -4.02727124453835 0.30728996176333 1.34544980774821  
 C -3.20185469055754 -0.42160755296042 0.29776584928666  
 N -4.06527740977922 -0.76030116113580 -0.81901044998232  
 H -3.58008505598180 -1.34715799340794 -1.48216181837856  
 H -5.22965869636407 0.10171482207060 -2.30862639299749  
 H -4.79684155535028 -0.37153020981139 1.72111961920910  
 F -3.20390200125609 0.62935445130645 2.41534656525428  
 H -3.82971767452534 1.07943574592454 -1.86609627406642  
 H -2.35093662670425 0.21465343346338 0.01365549894912  
 H -2.80355366854089 -1.33520358002211 0.73837649556328  
 H -5.39421917585005 1.92176101900869 1.54869472275746  
 C -3.68167327515284 2.68492887779352 0.53701154841212  
 H -6.32124059320158 0.55382175149572 -0.19400016270342  
 H -5.87275343401015 2.08967038645098 0.208967038645098  
 H -2.9565898317381 2.42002932758156 -0.23197297321117  
 H -3.13201314879242 2.92619275515770 1.44508450997548  
 H -4.20376240744052 3.58248589153846 0.20349999103713

### 3C\_ee, Water

C -5.47456942016063 1.18541221931488 -0.46238383681231  
 C -4.61883260278201 0.41839706379059 -1.46229535805964  
 C -4.68583698271775 1.56796397354596 0.79836114654518  
 C -4.03533094782791 0.30361129525483 1.34144158197198  
 C -3.20578965228007 -0.42381686295403 0.29848438580534  
 N -4.06892896611223 -0.77093774814533 -0.82055038104946  
 H -3.54933251285421 -1.31997050421590 -1.49284604900156  
 H -5.23147062517967 0.10605860266949 -2.30796884244626  
 H -4.80523909212942 -0.36994373692431 1.72381957644426  
 F -3.20530793768391 0.61901278924496 2.42389534596977  
 H -3.82680878697355 1.07098248749156 -1.85526612682839  
 H -2.36289256601771 0.21627322229186 0.00297480208443  
 H -2.80008516424044 -1.33463801346854 0.73833281173697  
 H -5.39314291524040 1.92521058316062 1.55113360937759  
 C -3.67837569915360 2.68257697306664 0.00297480208443  
 H -6.32615742925070 0.55934826056607 -0.18416762934390  
 H -5.87140881769420 2.08964657856530 -0.92755995282975  
 H -2.95076458245002 2.40872341250603 0.2100669999868  
 H -3.13316211636864 2.94021254145393 1.43978415280498  
 H -4.20262318288293 3.57416686278540 0.18648536212069

### 3C\_ea, Gas Phase

C -5.49136040192062 1.19775063619121 -0.45211701106064  
 C -4.64582031895676 0.39999520237919 -1.44363859843824  
 C -4.69102163853536 1.57677249552535 0.80232959634510  
 C -4.03851628832382 0.31677745824543 1.36324689036289  
 C -3.23770975764416 -0.44328049695848 0.31497671822600  
 N -4.03445734317332 -0.78004437520561 -0.85162672874705  
 H -4.74596358374184 -1.45969929613298 -0.61055037531543  
 H -5.24792556861204 0.09214111609619 -2.29883625823956  
 H -4.81607599204846 -0.34438958221648 1.76083456239574  
 F -3.20686686130888 0.64358020678377 2.42571660995357  
 H -3.84009334143798 1.02415849245636 -1.84021647052346  
 H -2.39210706850722 0.1707967770292 -0.00648411076017  
 H -2.82557884144197 -1.35153120126951 0.75420209478400  
 H -5.38776336938655 1.94632761433952 1.55918690077586  
 C -3.67613810380842 2.68237703571879 0.52859207836361  
 H -6.35406424245113 0.58710909275344 -0.16822047651786  
 H -5.88261844739962 2.10307562406960 -0.92274584062752  
 H -2.95619091141360 2.40521169250056 -0.24129441291045  
 H -3.12075594896555 2.92635350659822 1.43237102286791  
 H -4.19175197092270 3.58195800042253 0.19071380906569

### 3C\_ea, Water

C -5.48836417334949 1.19452598031831 -0.45075078563799  
 C -4.64281819382989 0.40392153118010 -1.44590526012639  
 C -4.68864832283503 1.57560719705830 0.80370138079863  
 C -4.04407728758583 0.31099472539645 1.35476730220699

|   |                   |                   |                   |
|---|-------------------|-------------------|-------------------|
| C | -3.23308214682797 | -0.44176397702989 | 0.31176130044816  |
| N | -4.03457560748554 | -0.78494513804273 | -0.85453965461771 |
| H | -4.76485014533213 | -1.43557561630561 | -0.58360648577510 |
| H | -5.24998862570976 | 0.09858664584666  | -2.29821139364713 |
| H | -4.81849121585658 | -0.35133640051054 | 1.75065532662369  |
| F | -3.20663628758156 | 0.63059838333604  | 2.43197041937932  |
| H | -3.83594218605517 | 1.02871029603078  | -1.83878937881657 |
| H | -2.39323096762577 | 0.17887335475329  | -0.01260217352434 |
| H | -2.82193856325568 | -1.34934095915379 | 0.75369147999659  |
| H | -5.38852359443599 | 1.94263626642284  | 1.55864627866161  |
| C | -3.67441608613245 | 2.68157947184135  | 0.52735368118891  |
| H | -6.34588509790100 | 0.57822064459785  | -0.16554154932678 |
| H | -5.88189797002101 | 2.09916658166736  | -0.91985856514066 |
| H | -2.94634910893141 | 2.39739947063554  | -0.2325891333952  |
| H | -3.12943013265359 | 2.94463694599416  | 1.43305972245614  |
| H | -4.19363428659414 | 3.57295359596358  | 0.17322748819215  |

#### 4A\_a, Gas Phase

|   |                   |                   |                   |
|---|-------------------|-------------------|-------------------|
| C | -5.32063049336662 | 1.67757617801567  | 0.54796178642108  |
| C | -5.16179435138591 | 0.77450368828591  | -0.67685186635826 |
| C | -4.01139050504999 | 2.43055284505668  | 0.80187857055429  |
| C | -5.79317068589127 | 0.88368933013287  | 1.76085641478462  |
| H | -6.08655341971812 | 2.41524111220052  | 0.2968878643739   |
| C | -2.80317077352875 | 1.51293281321855  | 0.86119864526217  |
| H | -4.07112899291601 | 3.00688051535896  | 1.72608101518220  |
| H | -3.83736200362426 | 3.14125731479495  | -0.01194535113079 |
| C | -2.75649990430487 | 0.56785138258753  | -0.32653760472106 |
| F | -2.8304644054224  | 0.76673196359218  | 2.02920826177716  |
| H | -1.88187574998132 | 2.09955102009349  | 0.88186675901916  |
| N | -4.02593328619052 | -0.11315324256089 | -0.51160864258013 |
| H | -1.97643788256147 | -0.17460577463641 | -0.18899729125547 |
| H | -2.53018559742452 | 1.15494066009562  | -1.22374296422168 |
| H | -4.98638082003521 | 1.38338801940143  | -1.57062677794177 |
| H | -6.06866098068237 | 0.20364657965984  | -0.84208762166933 |
| C | -4.03129348218651 | -1.46096947224668 | -0.55587417657582 |
| O | -3.05459609759532 | -2.15636827164205 | -0.44882367515009 |
| C | -5.39485364685087 | -2.17151904354664 | -0.77630741785036 |
| F | -6.27743830012572 | -1.86883728772563 | 0.183429882719092 |
| F | -5.22362921638940 | -3.47731317014679 | -0.77265618287014 |
| H | -5.93703534936831 | -1.82944326161659 | -1.95269890272270 |
| F | -5.85115663260297 | 1.52499339863893  | 2.64020345453362  |
| H | -5.10826006943900 | 0.06952716050039  | 1.99298063900698  |
| H | -6.77937735423844 | 0.45651554248816  | 1.58002523696800  |

#### 4A\_a, Chloroform

|   |                   |                   |                   |
|---|-------------------|-------------------|-------------------|
| C | -5.31766957395031 | 1.67220975639895  | 0.54856495027434  |
| C | -5.16195605524306 | 0.77886323094643  | -0.68331662042696 |
| C | -4.00923735882080 | 2.42362180771485  | 0.80907485237546  |
| C | -5.79503978964420 | 0.87308704400748  | 1.75615150397726  |
| H | -6.08190645778595 | 2.41136567161726  | 0.29993900002490  |
| C | -2.79700556416393 | 1.51419698433495  | 0.84796800667268  |
| H | -4.06759034642810 | 2.98926444761981  | 1.73997603522501  |
| H | -3.83845699595225 | 3.14348155829948  | 0.00353457338990  |
| C | -2.75466561919164 | 0.57771367791495  | -0.34387029645366 |
| F | -2.81031753053168 | 0.74738534065129  | 2.01527269340536  |
| H | -1.87804546290457 | 2.10120004790520  | 0.87002193947089  |
| N | -4.02420350232443 | -0.11405420481088 | -0.51892134088829 |
| H | -1.96060359600492 | -0.15160212884323 | -0.22422301493404 |
| H | -2.55533264944513 | 1.17386742594316  | -1.23904381347914 |
| H | -4.97586074826301 | 1.39033714701736  | -1.57058618809102 |
| H | -6.07101831216350 | 0.21351311669258  | -0.85412422821149 |
| C | -4.04045277047807 | -1.45028275249828 | -0.52010704971566 |
| O | -3.07210171561068 | -2.16210795109172 | -0.36036483438203 |
| C | -5.39875118888040 | -2.16171959982549 | -0.77139949792752 |
| F | -6.30365598957256 | -1.86811620777172 | 0.16712741998308  |
| F | -5.22099405641766 | -3.47200359636650 | -0.76112249674645 |
| F | -5.91466616771453 | -1.83127184857636 | -1.96018225172213 |
| H | -5.85103283001540 | 1.51234331060074  | 2.63751756880159  |
| H | -5.11485619280938 | 0.05297223030334  | 1.98499389375162  |
| H | -6.78385952575586 | 0.45330549181633  | 1.57093919562628  |

#### 4A\_e, Gas Phase

|   |                   |                  |                  |
|---|-------------------|------------------|------------------|
| C | -5.35777216886636 | 2.14518523542154 | 0.20158376920497 |
|---|-------------------|------------------|------------------|

|   |                   |                   |                   |
|---|-------------------|-------------------|-------------------|
| C | -5.34693593346625 | 0.78647428020659  | -0.49159763750300 |
| C | -4.10066339760125 | 2.93712933771292  | -0.09981952860126 |
| H | -5.47813708325856 | 2.00666543834861  | 1.27926349086172  |
| F | -6.46246482039927 | 2.84301304121939  | -0.25184717749973 |
| C | -2.84372070266521 | 2.12122971934170  | 0.20139990037274  |
| H | -4.10453767183705 | 3.86795585650365  | 0.46950739038770  |
| H | -4.11317864341616 | 3.20270063182780  | -1.16250520616640 |
| C | -2.91286966732125 | 0.79433546030227  | -0.54790141083797 |
| H | -2.82287369587951 | 1.88468642939930  | 1.27067445074771  |
| C | -1.57272771826979 | 2.86826789616558  | -0.16578104110474 |
| N | -4.11720827065508 | 0.07501337997963  | -0.18473518649012 |
| H | -2.03137151542708 | 0.19644974373687  | -0.34857530101691 |
| H | -2.94160530362690 | 0.98635451201972  | -1.62651350902818 |
| H | -5.40529392681538 | 0.95281782730924  | -1.57157815340519 |
| H | -6.19522815992841 | 0.18572229363973  | -0.17905021514205 |
| C | -4.17923939212575 | -1.09188453989332 | 0.48910734624515  |
| O | -5.19481961476339 | -1.62677839118759 | 0.85090059926453  |
| C | -2.83497414759517 | -1.80199544775385 | 0.81502627440207  |
| F | -2.05486357875660 | -1.03832040410382 | 1.59394500464767  |
| F | -2.14602191405175 | -2.09128829573240 | -0.29533399350915 |
| F | -3.06625366944261 | -2.92891689548849 | 1.45506525667232  |
| H | -1.55171789180561 | 3.09051285596983  | -1.23465262382294 |
| H | -0.69042490484371 | 2.27316480815756  | 0.07318578807235  |
| H | -1.50144620718186 | 3.81086522689756  | 0.37570532424872  |

#### 4A\_e, Chloroform

|   |                   |                   |                   |
|---|-------------------|-------------------|-------------------|
| C | -5.35106385837162 | 2.15513701238145  | 0.20535257557451  |
| C | -5.34334546054104 | 0.78956971776552  | -0.47206373036282 |
| C | -4.10221818390316 | 2.94713743317910  | -0.11506326691272 |
| H | -5.47197834823492 | 2.03684346264057  | 1.28395524866208  |
| F | -6.46919174507816 | 2.84226701739701  | -0.25844229704589 |
| C | -2.84670817295655 | 2.13663083672500  | 0.20610066886228  |
| H | -4.10488519314132 | 3.88612859414645  | 0.44041386309591  |
| H | -4.11188076178314 | 3.18874236141204  | -1.18327588115011 |
| C | -2.90687763078741 | 0.79698796368936  | -0.51991250170485 |
| H | -2.82972378627305 | 1.92427884649393  | 1.28021611651844  |
| C | -1.57686376868127 | 2.87972824649759  | -0.17380853634462 |
| N | -4.11477770476570 | 0.07919248131619  | -0.14778666331806 |
| H | -2.02418009429955 | 0.20766967067867  | -0.30224975783633 |
| H | -2.93416562769589 | 0.96528111142800  | -1.60126218055171 |
| H | -5.38803504628353 | 0.93969491323417  | -1.55437730414363 |
| H | -6.19762684265222 | 0.19920184629608  | -0.15807315327567 |
| H | -4.17655968270690 | -1.09906556620512 | 0.48247238359643  |
| O | -5.19546317301599 | -1.65888761025745 | 0.82284093317892  |
| C | -2.83594088878822 | -1.82066575472464 | 0.79825712046023  |
| F | -2.05437759798090 | -1.08932173545738 | 1.60074397282915  |
| F | -2.14577323046783 | -2.09509972711304 | -0.31316402076571 |
| F | -3.08128749526013 | -2.96550769371339 | 1.41165713121146  |
| H | -1.55799059989839 | 3.08259695570422  | -1.24659826288852 |
| H | -0.69401313050835 | 2.28980573376228  | 0.07613971938984  |
| H | -1.51142197592471 | 3.83101388272343  | 0.35339782292140  |

#### 4B\_a, Gas Phase

|   |                   |                   |                   |
|---|-------------------|-------------------|-------------------|
| C | -5.37169444385011 | 1.35528190571695  | -0.50508886231781 |
| C | -4.52838229875610 | 0.55984245780691  | -1.49448660949698 |
| C | -4.57292956947122 | 1.65368441639660  | 0.77149693176156  |
| C | -3.88331817734129 | 0.43050050898243  | 1.34472419152197  |
| C | -3.04325173473630 | -0.3034686589981  | 0.30363088073081  |
| N | -3.95316630422718 | -0.65735132212569 | -0.82276195538503 |
| H | -5.11966231059244 | 0.21772651454938  | -2.34119911542550 |
| H | -3.67652206273211 | 1.13240310812396  | -1.86009388195680 |
| H | -5.22917555516508 | 2.07968057712311  | 1.53007641263202  |
| H | -3.80054195989152 | 2.39983062346881  | 0.56624771195686  |
| H | -2.26523505323487 | 0.36535458256169  | -0.09579741135274 |
| H | -2.60202638268324 | -1.19005127185470 | 0.70804894713847  |
| H | -3.46056796552787 | -1.23687898500314 | -1.50156231604703 |
| H | -4.71592074066647 | -1.22232037492426 | -0.43509697764310 |
| F | -4.82448109680916 | -0.49817478588784 | 1.76703029791886  |
| H | -3.26134342572151 | 0.69261647934424  | 2.20011026509318  |
| H | -5.57496878274714 | 2.30890418022531  | -0.99576161262730 |
| C | -6.71607002687500 | 0.68271521014707  | -0.23428042415939 |
| H | -6.61831849773341 | -0.30736645561746 | 0.21204202407120  |
| H | -7.29599502785190 | 0.59555044023744  | -1.15238114002181 |
| H | -7.29471858338611 | 1.28020905419721  | 0.46879264360857  |

#### 4B\_a, Water

|   |                   |                   |                   |
|---|-------------------|-------------------|-------------------|
| C | -5.37736418422571 | 1.35616249547129  | -0.50423711485264 |
| C | -4.52405938058506 | 0.57344177632356  | -1.49164422518121 |
| C | -4.57338710614793 | 1.66524181372514  | 0.76308716775306  |
| C | -3.88556486944607 | 0.44951169668065  | 1.34811368030686  |
| C | -3.08893093212529 | -0.31063158693248 | 0.31378230003738  |
| N | -3.95995243151230 | -0.64758675543777 | -0.84281524966180 |
| H | -5.10078436035640 | 0.24465727540114  | -2.35206270196430 |
| H | -3.66948424199911 | 1.15580693826785  | -1.83086596168978 |
| H | -5.21519311092090 | 2.11397487503384  | 1.52161411864459  |
| H | -3.79036658289572 | 2.39106840550385  | 0.53061991704575  |
| H | -2.27595892252608 | 0.30796411151598  | -0.06111720613518 |
| H | -2.69084230796979 | -1.23475615023208 | 0.72114458686847  |
| H | -3.42546902008197 | -1.18261618844327 | -1.52639925603218 |
| H | -4.71552374685866 | -1.26279363219915 | -0.53372783909223 |
| F | -4.83843153285533 | -0.43213451574790 | 1.87213903943397  |
| H | -3.22430282380034 | 0.73187409823968  | 2.16572634372957  |
| H | -5.59731083708649 | 2.30665359519032  | -0.99281267693726 |
| C | -6.70631066123006 | 0.66009271149926  | -0.22259887876559 |
| H | -6.57538493641059 | -0.33727618087267 | 0.19764620477844  |
| H | -7.28901489176716 | 0.57132995290708  | -1.13925604443253 |
| H | -7.28465311919906 | 1.23912526410570  | 0.49735379614662  |

#### 4B\_e, Gas Phase

|   |                   |                   |                   |
|---|-------------------|-------------------|-------------------|
| C | -5.45427792442840 | 1.34054222173241  | -0.48606921618633 |
| C | -4.61400460692865 | 0.56956749656253  | -1.49973023526816 |
| C | -4.66757544975187 | 1.65109878690303  | 0.77020687426642  |
| C | -4.05585303333124 | 0.38816688461368  | 1.37893536154146  |
| C | -3.21487832350824 | -0.34395786606981 | 0.34725265768233  |
| N | -4.05003676386629 | -0.66255740300983 | -0.86354918554985 |
| H | -4.86195256548007 | -0.28485535757758 | 1.69573507149572  |
| C | -3.20227317333190 | 0.71771046731262  | 2.59764594103193  |
| F | -5.84028530618167 | 2.49283348438796  | -1.11313756441456 |
| H | -6.35825059608016 | 0.77193258585373  | -0.24104086152165 |
| H | -5.20280754955651 | 0.27677331675625  | -2.36520150878695 |
| H | -3.77182042656877 | 1.18190978625414  | -1.81999351409065 |
| H | -5.32041868604834 | 2.13545214549655  | 1.49642891472311  |
| H | -3.87531937310336 | 2.36313075607136  | 0.52034366923575  |
| H | -2.38844751283940 | 0.27640918799913  | -0.00193298859733 |
| H | -2.81920282881695 | -1.28250917482564 | 0.73019250380132  |
| H | -3.49321507290436 | -1.17580384174073 | -1.54813363376696 |
| H | -4.81219021224860 | -1.28511820041742 | -0.58390745076158 |
| H | -2.39650891501684 | 1.40412581495057  | 2.33269606184782  |
| H | -2.76125346731547 | -0.17674666349475 | 3.03655986541359  |
| H | -3.81037821269287 | 1.19914557224180  | 3.36178923790458  |

#### 4B\_e, Water

|   |                   |                   |                   |
|---|-------------------|-------------------|-------------------|
| C | -5.44995525996082 | 1.32742739227508  | -0.47733513342176 |
| C | -4.60933406494213 | 0.56821195397838  | -1.49032526935513 |
| C | -4.66287082082782 | 1.65943585197133  | 0.76894113185861  |
| C | -4.05842543516503 | 0.39319290477415  | 1.37719174506663  |
| C | -3.22248580193812 | -0.34138646172875 | 0.34427313266079  |
| N | -4.04684513899998 | -0.65294286074162 | -0.85941991408153 |
| H | -4.87077040473931 | -0.27260229480721 | 1.68616815405815  |
| C | -3.20615263416743 | 0.71820110161171  | 2.59570139662441  |
| F | -5.86727856927594 | 2.49385253391228  | -1.10430755645411 |
| H | -6.34627574459195 | 0.75533023435785  | -0.22830031315824 |
| H | -5.19914506108758 | 0.26637034353879  | -2.35033566026013 |
| H | -3.76895618687641 | 1.18113530643019  | -1.81208070828398 |
| H | -5.31280482353177 | 2.14809799782962  | 1.49542585482575  |
| H | -3.86199783746736 | 2.35655169851828  | 0.50471867432618  |
| H | -2.38960287126123 | 0.27225186874861  | 0.00120358654818  |
| H | -2.84080920589548 | -1.28384595468361 | 0.72767740478070  |
| H | -3.48028513652347 | -1.15289334036473 | -1.54474964065089 |
| H | -4.79977619875935 | -1.29380537539151 | -0.60070113461692 |
| H | -2.39012141932873 | 1.39056709522011  | 2.32409698735235  |
| H | -2.77676136327512 | -0.18514766408717 | 3.02913619171132  |
| H | -3.81029602138493 | 1.20924766863822  | 3.35811107046962  |

#### 4C\_ae, Gas Phase

|   |                   |                   |                   |
|---|-------------------|-------------------|-------------------|
| C | -5.37353495094612 | 1.36370955778750  | -0.51497385403349 |
| C | -4.48941911228446 | 0.57451648541974  | -1.48427524083930 |
| C | -4.57393352935595 | 1.67182505992033  | 0.75586286556581  |
| C | -3.89256255788304 | 0.44930122160945  | 1.34648342412022  |
| C | -3.12549160168623 | -0.31897181367745 | 0.28491712915893  |
| N | -3.98542771212175 | -0.62282829390299 | -0.83758517050799 |
| H | -5.07335381883360 | 0.28069174630407  | -2.35774133900973 |
| H | -3.67265215055984 | 1.22980977946011  | -1.83174694257775 |
| H | -5.21020064047750 | 2.13207084331201  | 1.51394633540481  |
| H | -3.78443873298410 | 2.39115610261641  | 0.51662795126759  |
| H | -2.26007577225996 | 0.30610018582841  | 0.00283589786374  |
| H | -2.74656472114544 | -1.24436117154557 | -0.71779705033811 |
| H | -3.52398317037030 | -1.23328546308987 | -1.49530410178892 |
| F | -4.83440290275032 | -0.38362722740388 | 1.93521291970400  |
| H | -3.20550912122784 | 0.75082285198409  | 2.14082631957263  |
| H | -5.61067480736629 | 2.31791895456488  | -0.99338594610201 |
| C | -6.68325327110919 | 0.63823764088672  | -0.22364262346393 |
| H | -6.49508476114230 | -0.3617511145138  | 0.16132096370753  |
| H | -7.28313015534541 | 0.55215966055734  | -1.13088868856172 |
| H | -7.26882651015035 | 1.18298499082009  | 0.51845305018146  |

#### 4C\_ae, Water

|   |                   |                   |                   |
|---|-------------------|-------------------|-------------------|
| C | -5.37526801393418 | 1.35796248705453  | -0.51256965765440 |
| C | -4.49561615005996 | 0.56298056704050  | -1.47955388802487 |
| C | -4.57759688978656 | 1.66523441146467  | 0.75948825117116  |
| C | -3.88266211189371 | 0.45051972659779  | 1.34304717856632  |
| C | -3.12225760922529 | -0.32023435241183 | 0.28388347206679  |
| N | -3.98824934079272 | -0.64163086101202 | -0.83636694688862 |
| H | -5.07681386634512 | 0.27285323152791  | -2.35606762897500 |
| H | -3.67374343262967 | 1.21149556344633  | -1.82148987291106 |
| H | -5.21335507683486 | 2.12370403381843  | 1.51944122414883  |
| H | -3.79008824680331 | 2.38617274287658  | 0.52124324236638  |
| H | -2.26956674975503 | 0.31127305084470  | -0.01249661076970 |
| H | -2.72451963631066 | -1.23775954281995 | 0.71702115120179  |
| H | -3.48138875170328 | -1.20435981946838 | -1.50669164683018 |
| F | -4.82891208511974 | -0.39816797470913 | 1.94109088186161  |
| H | -3.20076054473548 | 0.74892948174342  | 2.14014733830053  |
| H | -5.60335539687741 | 2.31217604835397  | -0.99418217573374 |
| C | -6.69566261965750 | 0.65036634933280  | -0.22463440182946 |
| H | -6.52403329635746 | -0.34508525989965 | 0.1808959007843   |
| H | -7.28506957294195 | 0.55405786027152  | -1.13801191505521 |
| H | -7.28360060823611 | 1.21599225594780  | 0.50055141491039  |

#### 4C\_aa, Gas Phase

|   |                   |                   |                   |
|---|-------------------|-------------------|-------------------|
| C | -5.38158216734614 | 1.36607674568950  | -0.50397212349760 |
| C | -4.52142324774851 | 0.53423641637144  | -1.46495244877702 |
| C | -4.57468175661505 | 1.67374012119431  | 0.76434770596319  |
| C | -3.89392050470825 | 0.45167865026182  | 1.35563362762541  |
| C | -3.13450331032911 | -0.32665118986578 | 0.29437987050121  |
| N | -3.94009708365871 | -0.65470861453831 | -0.86383534749039 |
| H | -5.11105729322760 | 0.23633854209275  | -2.33375185682415 |
| H | -3.69367360028573 | 1.14806688327307  | -1.83602582777969 |
| H | -5.20599179990917 | 2.13998225987802  | 1.52309609206929  |
| H | -3.78335565175861 | 2.38965318315824  | 0.52047120070031  |
| H | -2.28776006280174 | 0.28438371890278  | -0.03681342458632 |
| H | -2.72855850654120 | -1.23995768998214 | 0.72926745874814  |
| H | -4.66121834286271 | -1.31658542139477 | -0.60597839532949 |
| F | -4.85261667303443 | -0.39742484973555 | 1.91096662943279  |
| H | -3.22631420760605 | 0.74149171534727  | 2.17044988395085  |
| H | -5.60317291991922 | 2.31874178119650  | -0.99368453344824 |
| C | -6.70796972862081 | 0.67160313256239  | -0.21173589597046 |
| H | -6.55618012210426 | -0.32306576029336 | 0.20608632646144  |
| H | -7.29442867086753 | 0.57404820074238  | -1.12661377035058 |
| H | -7.29653435005516 | 1.23754217513946  | 0.51091482860133  |

#### 4C\_aa, Water

|   |                   |                   |                   |
|---|-------------------|-------------------|-------------------|
| C | -5.38195075271078 | 1.36364874999332  | -0.50404050560851 |
| C | -4.52010276555183 | 0.53891320333171  | -1.46702021590341 |
| C | -4.57621081414323 | 1.67261700398360  | 0.76392931943494  |
| C | -3.88387510936343 | 0.45902537756168  | 1.35234456351681  |
| C | -3.13649046201660 | -0.33116597776712 | 0.29477770398150  |
| N | -3.94765053601596 | -0.66073945540521 | -0.86558265888451 |
| H | -5.10838506932926 | 0.24867142093483  | -2.33933881149462 |



|   |                   |                   |                   |
|---|-------------------|-------------------|-------------------|
| H | -3.68782343547104 | 1.15349980383138  | -1.82469889967720 |
| H | -5.20749207222729 | 2.13675119396504  | 1.52424818353643  |
| H | -3.78755758994745 | 2.39053278953823  | 0.51968077551199  |
| H | -2.28836634827096 | 0.27640170230958  | -0.03632080943790 |
| H | -2.73581389367289 | -1.24441568550435 | 0.73494960509280  |
| H | -4.68669965499323 | -1.29810554979495 | -0.59117986381051 |
| F | -4.84232719869773 | -0.39379030447644 | 1.93343367992155  |
| H | -3.20968320870616 | 0.75112961418880  | 2.15856066461324  |
| H | -5.60472198939828 | 2.31615662492654  | -0.99225229536931 |
| C | -6.70756925795522 | 0.66473327951414  | -0.21712961909360 |
| H | -6.55428730576812 | -0.33683187130634 | 0.18519483187527  |
| H | -7.29385434703920 | 0.57687790171111  | -1.13332996056734 |
| H | -7.29417818872132 | 1.22528017846446  | 0.51202431236240  |

|   |                   |                   |                   |
|---|-------------------|-------------------|-------------------|
| H | -2.40952544666024 | 0.24958960834980  | 0.03619359129452  |
| H | -2.87992393132102 | -1.29185635780054 | 0.73526567441361  |
| H | -4.75240480802016 | -1.33901327544586 | -0.68319336635576 |
| H | -2.38193494217884 | 1.39633547428983  | 2.30662224516219  |
| H | -2.75586273135010 | -0.16983938757327 | 3.02847842210965  |
| H | -3.77344443189202 | 1.22990798827048  | 3.37781206268057  |

#### 4C\_ea, Water

|   |                   |                   |                   |
|---|-------------------|-------------------|-------------------|
| C | -5.45029777159853 | 1.32143552969700  | -0.47933648411130 |
| C | -4.59792760539990 | 0.54370502949796  | -1.46867963768077 |
| C | -4.67267282543810 | 1.65766039670803  | 0.77333734215351  |
| C | -4.06469147468607 | 0.39623123903604  | 1.39085821591939  |
| C | -3.26725111991502 | -0.35588317957760 | 0.32566615673702  |
| N | -4.03227417330086 | -0.65896163035232 | -0.87756469156188 |
| H | -4.88055328122895 | -0.26152626785008 | 1.71120946694249  |
| C | -3.19854000462800 | 0.72843767553019  | 2.59672745348029  |
| F | -5.87865838214995 | 2.50784605555307  | -1.09220097028374 |
| H | -6.35085510401338 | 0.75198788788620  | -0.23637037160480 |
| H | -5.18701404540104 | 0.27888935661275  | -2.34655457702219 |
| H | -3.77662608045085 | 1.18997350754400  | -1.79580873756588 |
| H | -5.31954538034614 | 2.16431407822416  | 1.49236610781771  |
| H | -3.86584399143312 | 2.34760364694549  | 0.50179828016875  |
| H | -2.40624884306480 | 0.25633994985319  | -0.037588015679   |
| H | -2.87545870704176 | -1.28727428317690 | 0.73779805444114  |
| H | -4.77494641070836 | -1.31196978458145 | -0.65170429854441 |
| H | -2.38148127575088 | 1.39380026518289  | 2.621753315081495 |
| H | -2.76179533656723 | -0.17499129228457 | 3.02573379504070  |
| H | -3.78019818687704 | 1.22667181955195  | 3.37327786473222  |

#### 4C\_ee, Gas Phase

|   |                   |                   |                   |
|---|-------------------|-------------------|-------------------|
| C | -5.44219363267079 | 1.31695295134887  | -0.49594593460961 |
| C | -4.56353341802956 | 0.56680217301526  | -1.48237103490063 |
| C | -4.67789555782341 | 1.64237667068300  | 0.77029800161210  |
| C | -4.04980957137766 | 0.38583356189708  | 1.37583387005117  |
| C | -3.23384736436580 | -0.33963423636835 | 0.30978740036116  |
| N | -4.06666752928050 | -0.63556431672694 | -0.84208227760230 |
| H | -4.8533865497859  | -0.29109941770042 | 1.68223957207935  |
| C | -3.19599798107136 | 0.72510372634484  | 2.58881768603751  |
| F | -5.87449357480048 | 2.49345553192271  | -1.09098587972096 |
| H | -6.32853874706403 | 0.71972178225675  | -0.26861628854899 |
| H | -5.14967652581459 | 0.29769192209882  | -2.36056041712067 |
| H | -3.76069557255661 | 1.25120859177267  | -1.79952080413307 |
| H | -5.33641690670471 | 2.13185133798882  | 1.49045738995319  |
| H | -3.88571741376156 | 2.35387003029052  | 0.51244936460048  |
| H | -2.36821222881299 | 0.29325550447337  | 0.04763250244970  |
| H | -2.84751702256051 | -1.27600220152991 | 0.71548157528070  |
| H | -3.58066287894483 | -1.22251523103627 | -1.50424002426472 |
| H | -2.37484691645050 | 1.38839524340573  | 2.30831118190115  |
| H | -2.76549265992225 | -0.17299428635640 | 3.03415294623492  |
| H | -3.78554794300927 | 1.23080066221986  | 3.35423117033953  |

#### 5A\_a, Gas Phase

|   |                   |                    |                   |
|---|-------------------|--------------------|-------------------|
| C | -5.35156944613965 | 1.52792395526125   | 0.55258893582623  |
| C | -5.05550002473412 | 0.88148605541547   | -0.79604015885387 |
| C | -4.11083534024932 | 2.21964842567233   | 1.10890262249906  |
| C | -2.91156624208247 | 1.29040726482192   | 1.09203763761524  |
| H | -4.28119420500294 | 2.57472986832429   | 2.12513598297369  |
| H | -3.86211896220589 | 3.09173084469829   | 0.49686561948947  |
| C | -2.70011841888429 | 0.68148666982358   | -0.29429644009005 |
| F | -3.11523790152011 | 0.26312462842068   | 1.99825749816711  |
| H | -2.00400140410945 | 1.81767513054891   | 1.39671385866379  |
| N | -3.92671067693156 | -0.03339395642719  | -0.67719096241124 |
| C | -1.38184582877786 | -0.06638754864989  | -0.39359105067355 |
| H | -2.64492332863389 | 1.52610520478295   | -0.98928322314150 |
| C | -4.05434456943486 | -1.37156931597331  | -0.53414250025538 |
| O | -3.18317974885289 | -2.13846230231790  | -0.22314026395910 |
| C | -5.45357512021448 | -1.99100412413028  | -0.83574095086604 |
| F | -5.87564848103951 | -1.70484998344462  | -0.27430331938824 |
| F | -6.38314254938169 | -1.55099432635340  | 0.02467852970914  |
| H | -5.39175537904637 | -3.301177388186613 | -0.72388486045993 |
| H | -6.16902765518337 | 2.24113044125891   | 0.44576180725426  |
| H | -5.67949971348004 | 0.75036960279242   | 1.24439478735514  |
| H | -5.92676012689435 | 0.36929873282520   | -1.18410682912599 |
| H | -4.77912251205574 | 1.64308035018653   | -1.53040269871275 |
| H | -1.29758400355620 | -0.60731509367328  | -1.33303091945476 |
| H | -1.25151651834788 | -0.77202143502022  | 0.42002286306995  |
| H | -0.58389184324106 | 0.67754480342349   | -0.35227596523066 |

#### 4C\_ee, Water

|   |                   |                   |                   |
|---|-------------------|-------------------|-------------------|
| C | -5.44163078413628 | 1.30932942267686  | -0.49036076144939 |
| C | -4.56572701145695 | 0.56419829590082  | -1.47999263542496 |
| C | -4.67888293185201 | 1.64408267991723  | 0.77127091820131  |
| C | -4.05305966111407 | 0.38565315511260  | 1.37683410591034  |
| C | -3.23942149534585 | -0.34308771483272 | 0.31209972439150  |
| N | -4.07158631064558 | -0.64564145974351 | -0.84439529590568 |
| H | -4.85932595282332 | -0.28494610781479 | 1.69116722306036  |
| C | -3.19486700940340 | 0.72621220800468  | 2.58658612443214  |
| F | -5.87882186518589 | 2.49504434544405  | -1.09480886190376 |
| H | -6.33431398076524 | 0.72316344404627  | -0.26349401707550 |
| H | -5.14776662441011 | 0.30004788772603  | -2.36251644850351 |
| H | -3.75462225769380 | 1.24183087539307  | -1.78770379503102 |
| H | -5.33678417982152 | 2.13178955832645  | 1.49322468526695  |
| H | -3.88198636716088 | 2.34959615030857  | 0.51101252723974  |
| H | -2.37793191056149 | 0.28916071341072  | 0.04126408464102  |
| H | -2.85008340297371 | -1.27741259710818 | 0.71892222519858  |
| H | -3.55212619272761 | -1.19682965758368 | -1.51473386631334 |
| H | -2.37065677774578 | 1.38285140506375  | 2.29849328537936  |
| H | -2.76979866439154 | -0.17429615422772 | 3.03263199850360  |
| H | -3.78175661978496 | 1.23876354997952  | 3.34986877938227  |

#### 5A\_a, Chloroform

|   |                   |                    |                   |
|---|-------------------|--------------------|-------------------|
| C | -5.35102640485844 | 1.53042246383733   | 0.55625248018235  |
| C | -5.05848239827673 | 0.87981372590034   | -0.79051231919649 |
| C | -4.10838481818539 | 2.2121913848716943 | 1.11222151189152  |
| C | -2.90475172576868 | 1.29937721311163   | 1.08999295466850  |
| H | -4.27663929813574 | 2.57418747201324   | 2.12886739459639  |
| H | -3.86067129293037 | 3.09046974193237   | 0.49936599212138  |
| C | -2.70052240291694 | 0.67792016666619   | -0.28909447725001 |
| F | -3.09292967420362 | 0.26843366549863   | 2.01129596499144  |
| H | -1.99855142271027 | 1.83104373436956   | 1.38515812233528  |
| N | -3.93258037670308 | -0.04335323228132  | -0.65597565335580 |
| C | -1.38163559067334 | -0.06551234797895  | -0.39742524538542 |
| H | -2.65605550199367 | 1.51506336906338   | -0.99099976644892 |
| C | -4.06399901221463 | -1.36933029629185  | -0.51953705114261 |
| O | -3.20085610554313 | -2.14908038728791  | -0.18738194024851 |
| C | -5.45626369635103 | -1.99090918803649  | -0.85031846486100 |
| F | -5.85934258045356 | -1.70473873490306  | -2.09298553218686 |

#### 4C\_ea, Gas Phase

|   |                   |                   |                   |
|---|-------------------|-------------------|-------------------|
| C | -5.45423337908562 | 1.33212647280812  | -0.48332263735391 |
| C | -4.60157152382584 | 0.54248469961155  | -1.46636915461478 |
| C | -4.67501434274791 | 1.65639578495600  | 0.77523132515335  |
| C | -4.06697934588045 | 0.3967522501162   | 1.39546633314109  |
| C | -3.27415880955682 | -0.35926451014379 | 0.32756951831557  |
| N | -4.03227674805707 | -0.65385433081032 | -0.87534845306916 |
| H | -4.88270294430006 | -0.25962317823475 | 1.72180304542750  |
| C | -3.19728455822182 | 0.73054178817324  | 2.59835107604239  |
| F | -5.87215635048320 | 2.51002768269037  | -1.08687540386991 |
| H | -6.35529828815468 | 0.76052197503033  | -0.23698948183155 |
| H | -5.18604873593766 | 0.27683459299272  | -2.34687079867685 |
| H | -3.78236572373153 | 1.18813949177301  | -1.79886840702436 |
| H | -5.31973936916920 | 2.16985359947253  | 1.49123009904388  |
| H | -3.86995358942505 | 2.34822465657891  | 0.50420431001196  |

|   |                   |                   |                   |
|---|-------------------|-------------------|-------------------|
| F | -6.40253997216699 | -1.56899812277429 | -0.00204688273825 |
| F | -5.38773424888013 | -3.30668144991720 | -0.74610764549079 |
| H | -6.16162026642067 | 2.24954504895461  | 0.44151062544340  |
| H | -5.68960035635980 | 0.75877610737974  | 1.25033605378417  |
| H | -5.93250146972674 | 0.37268389741337  | -1.17862286919193 |
| H | -4.76926851943901 | 1.63374461171339  | -1.52521861964145 |
| H | -1.30518105051226 | -0.60878862992198 | -1.33660665788305 |
| H | -1.23336960850147 | -0.76128289777974 | 0.42193235341001  |
| H | -0.59016220607429 | 0.68520827445958  | -0.37074032840333 |

|   |                   |                   |                   |
|---|-------------------|-------------------|-------------------|
| H | -5.13888622160076 | 2.20416541719527  | 1.54098394313471  |
| H | -3.73758055274114 | 2.44871022447942  | 0.51256078224014  |
| H | -2.21653967215877 | 0.22764269105150  | 0.00116731592347  |
| H | -2.71736437713869 | -1.27417125385490 | 0.79739835644651  |
| H | -3.46127109319145 | -1.20922906489665 | -1.46086023350431 |
| H | -4.77464090170823 | -1.15270674657080 | -0.46864402946445 |
| H | -5.78601664674922 | 2.20569065292723  | -0.86312408393400 |
| F | -6.2933768460192  | 0.43947762736975  | -0.03774018389446 |
| H | -4.60542196091105 | -0.14966312397720 | 1.88166569872576  |
| H | -3.15172053200235 | 0.76471181435240  | 2.21753281463088  |
| H | -6.11199363142443 | -0.29103171534061 | -2.48548541124911 |
| H | -4.59010784885134 | -0.29131910400822 | -3.40829067116819 |
| H | -5.50587532747421 | 1.19645405359886  | -3.21175829019086 |

### 5A\_e, Gas Phase

|   |                   |                   |                   |
|---|-------------------|-------------------|-------------------|
| C | -5.21965986631879 | 1.78490561473569  | 0.66499931661582  |
| C | -5.14645535976138 | 0.82260905350617  | -0.52468911108741 |
| C | -3.90241564335368 | 2.46790482009921  | 0.95483238006518  |
| C | -2.83368463585809 | 1.40543959173479  | 1.17876033606894  |
| H | -4.01092196857453 | 3.11060509271175  | 1.82816114967513  |
| H | -3.63327279293227 | 3.10517739968930  | 0.1089080237792   |
| C | -2.73142731617377 | 0.48112188325925  | -0.02348378541131 |
| H | -3.07857329919610 | 0.80805245990320  | 2.06068575772185  |
| H | -1.86283683754271 | 1.86706254416773  | 1.35579252120065  |
| N | -4.02826905604260 | -0.10964037427690 | -0.32183334751586 |
| H | -2.01013919548479 | -0.30204700564939 | 0.17501531021140  |
| H | -2.37726037852872 | 1.03923082058196  | -0.89604229783036 |
| C | -5.04646725009895 | 1.54121725981085  | -1.86393983421315 |
| H | -6.05241503502795 | 0.22138179124948  | -0.52324889312081 |
| C | -4.21186825711848 | -1.37840648662533 | -0.75159702221847 |
| O | -5.24429900812758 | -1.80778659756527 | -1.19808578821640 |
| C | -3.01623621609837 | -2.36719627382066 | -0.64822146985301 |
| F | -2.00524506609483 | -1.98944279527820 | -1.44136895935530 |
| F | -3.39791281241402 | -3.57053493939685 | -1.02360126408385 |
| F | -2.54587327511008 | -2.45663032232670 | 0.60235640137537  |
| F | -6.19187441821884 | -2.73211210996373 | 0.39594199602209  |
| H | -5.55016770886763 | 1.23015517834963  | 1.5471797098812   |
| H | -4.11562327007214 | 2.09897118547991  | -1.96452039392687 |
| H | -5.87186037559299 | 2.24279872917394  | -1.96777699018252 |
| H | -5.10565095739070 | 0.81260926052271  | -2.67101468530714 |

### 5B\_a, Water

|   |                    |                   |                   |
|---|--------------------|-------------------|-------------------|
| C | -5.28837993307852  | 1.37051550935102  | -0.41759079132961 |
| C | -4.46151666377202  | 0.61460117832426  | -1.44361971748597 |
| C | -4.48817584845815  | 1.71270157586821  | 0.81909802490763  |
| C | -3.86075121438477  | 0.46077591126981  | 1.42201808437982  |
| C | -3.06691336821608  | -0.31589889174883 | 0.39117513567919  |
| N | -3.93149046423157  | -0.62048672448183 | -0.78718688758797 |
| C | -5.23120945647766  | 0.25213445891180  | -2.69053365014418 |
| H | -3.58921222221040  | 1.21938753769330  | -1.69158261905534 |
| H | -5.13387393317373  | 2.21118834058659  | 1.54094478129595  |
| H | -3.71286783332001  | 2.42418085181408  | 0.52526476071378  |
| H | -2.22673716971612  | 0.26234786038561  | 0.01028267216632  |
| H | -2.70486477668882  | -1.26282084456154 | 0.77953682114347  |
| H | -3.40502425762561  | -1.16537182887187 | -1.47032654356846 |
| H | -4.71688363455025  | -1.20871463013466 | -0.49664707226530 |
| H | -5.70815597333902  | 2.25954335872513  | -0.88613693497642 |
| F | -6.35789360829031  | 0.54364366012252  | -0.05398793298618 |
| H | -4.63755888521270  | -0.18181761923143 | 1.83962537455635  |
| H | -3.19052274877224  | 0.72860443235743  | 2.23714965544687  |
| H | -6.10812408743012  | -0.34638561585730 | -2.44759440928617 |
| H | -4.242003802564991 | -0.30122642575558 | -3.38433036138432 |
| H | -5.55795589540196  | 1.16847790521510  | -3.17947839021949 |

### 5A\_e, Chloroform

|   |                   |                   |                   |
|---|-------------------|-------------------|-------------------|
| C | -5.22480834696386 | 1.71904403702067  | 0.65276236361777  |
| C | -5.13661376594976 | 0.84088880813108  | -0.60048651235461 |
| C | -3.92264760980063 | 2.40914978123673  | 0.98640675854476  |
| C | -2.82425209915139 | 1.36068816168076  | 1.12766624509735  |
| H | -4.04009259295805 | 2.97760440976342  | 1.90872173768552  |
| H | -3.66991191478052 | 3.11398394990186  | 0.19069107146144  |
| C | -2.72180669728695 | 0.51630166999921  | -0.13230991224349 |
| H | -3.03924913729182 | 0.70522562676050  | 1.97534579258683  |
| H | -1.86312337924088 | 1.83796365781687  | 1.31367597091528  |
| N | -4.01252242030303 | -0.09216545427299 | -0.43476543187945 |
| H | -1.96553039999294 | -0.24891839187487 | -0.01353356248379 |
| H | -2.42403551400445 | 1.13812519344244  | -0.97963816840555 |
| C | -5.01659812833364 | 1.64806365519640  | -1.88597266923516 |
| H | -6.04031907107843 | 0.23990558195984  | -0.64916016430545 |
| C | -4.22250132590048 | -1.38986440674903 | -0.68962863677475 |
| O | -5.28060694245658 | -1.87335992674874 | -1.02980423157055 |
| C | -3.02735128552890 | -2.37316526394067 | -0.53172651130374 |
| F | -2.04404155212124 | -2.10166877347613 | -1.39613585741903 |
| F | -3.43609492174710 | -3.60870151346255 | -0.76595913376539 |
| F | -2.51373925457265 | -2.34436380382737 | 0.70271838696469  |
| F | -6.22090075931877 | 2.66825617926238  | 0.44292048737061  |
| H | -5.54818588772883 | 1.10288330060938  | 1.49428911055192  |
| H | -4.11547321984284 | 2.25931967573383  | -1.91149184898704 |
| H | -5.87540516882679 | 2.31026326197631  | -1.97980783043538 |
| H | -5.00459860481946 | 0.97421112386067  | -2.74156745363279 |

### 5B\_e, Gas Phase

|   |                    |                   |                   |
|---|--------------------|-------------------|-------------------|
| C | -5.37879805157138  | 1.36485345394075  | -0.43854993249419 |
| C | -4.54720329878734  | 0.60214770623883  | -1.45044104432100 |
| C | -4.57693077821790  | 1.70560554533464  | 0.81608018729226  |
| C | -3.98464703554929  | 0.44716214315472  | 1.41844848511581  |
| C | -3.13242462717048  | -0.34594405360422 | 0.41741680856248  |
| N | -3.98611600853128  | -0.63189271534800 | -0.80017433986488 |
| H | -5.21821197032631  | 2.18231172570311  | 1.55593373468964  |
| H | -3.77773142633580  | 2.41154095697185  | 0.58475736598948  |
| C | -1.85512083897703  | 0.36146877033865  | 0.02040321146867  |
| H | -2.89768743603491  | -1.32035178167735 | 0.84470274941610  |
| H | -3.42511966305642  | -1.15484241799959 | -1.47485758478685 |
| H | -4.76344105975246  | -1.24028719887618 | -0.53267445431038 |
| H | -4.78759672135100  | -0.19446714133531 | 1.79859521818341  |
| F | -3.16647240363778  | 0.75232954441925  | 2.47181561081248  |
| H | -5.74416667076776  | 2.27426244873292  | -0.91354928713091 |
| H | -6.26388877201636  | 0.77724916268397  | -0.17750003090912 |
| H | -5.13087344187332  | 0.27813928172551  | -2.30891503132655 |
| H | -3.69984082858934  | 1.18471064677344  | -1.80474827955857 |
| H | -2.02666140392737  | 1.36812588124010  | -0.35462501440697 |
| H | -1.340091232920821 | -0.20621305948433 | -0.72748991592448 |
| H | -1.22915523431827  | 0.44696110106722  | 0.90590154350358  |

### 5B\_e, Water

|   |                   |                    |                    |
|---|-------------------|--------------------|--------------------|
| C | -5.37147905370215 | 1.36755087905366   | -0.437595376663377 |
| C | -4.53972417952531 | 0.59654134348764   | -1.44175803152152  |
| C | -4.57137588676922 | 1.70921144496651   | 0.81784120820733   |
| C | -3.99504734107002 | 0.44232577284746   | 1.40871206579326   |
| C | -3.13632277858941 | -0.34142947230729  | 0.41418677885771   |
| N | -3.98144758858713 | -0.62633017911071  | -0.79154243756877  |
| H | -5.21419667306398 | 2.18671857406680   | 1.55626768228892   |
| H | -3.76518343417289 | 2.40478974139507   | 0.57904672860176   |
| C | -1.86043849483963 | 0.37129422587161   | 0.01839175006176   |
| N | -2.89945417159596 | -1.31414982043683  | 0.84004914636528   |
| H | -3.42504678594925 | -1.466611971702738 | -1.466611971702738 |
| H | -4.75195494484277 | -1.24415292173849  | -0.52876302980534  |

### 5B\_a, Gas Phase

|   |                   |                   |                   |
|---|-------------------|-------------------|-------------------|
| C | -5.30245000103960 | 1.34087243303636  | -0.40927694851086 |
| C | -4.45407088251991 | 0.62424958808334  | -1.45330532478753 |
| C | -4.49204444530705 | 1.71718385795238  | 0.81300087349576  |
| C | -3.84033489028377 | 0.47943867382439  | 1.42370927103133  |
| C | -3.06765628134134 | -0.32676911079303 | 0.39563844032510  |
| N | -3.95131166868052 | -0.62701432807634 | -0.78125654713651 |
| C | -5.20931230869411 | 0.27504429438845  | -2.71279485055262 |
| H | -3.57021307158012 | 1.22364311925841  | -1.67504092156069 |

|   |                   |                   |                   |
|---|-------------------|-------------------|-------------------|
| H | -4.79936902698961 | -0.19999090159247 | 1.77479280543275  |
| F | -3.18705515980383 | 0.74232168024855  | 2.49648336363484  |
| C | -5.72916095685550 | 2.27745377950060  | -0.91617458368881 |
| H | -6.25101133993127 | 0.77645818946962  | -0.17133728957788 |
| H | -5.12831510481325 | 0.26206830477890  | -2.29079840823593 |
| H | -3.69790667044857 | 1.17942081940436  | -1.80688814475603 |
| H | -2.03727561413765 | 1.37846680052728  | -0.35312674427395 |
| H | -1.33090561897436 | -0.19669979596137 | -0.74572041136943 |
| H | -1.22032917533825 | 0.44391014354049  | 0.89458264521521  |

|   |                   |                   |                   |
|---|-------------------|-------------------|-------------------|
| H | -4.60153519179195 | -0.29754853585839 | -3.36899511407646 |
| H | -5.60279128905158 | 1.14989497111936  | -3.16013592846414 |

### 5C\_ae, Gas Phase

|   |                   |                   |                   |
|---|-------------------|-------------------|-------------------|
| C | -5.27191402229245 | 1.39076427023461  | -0.43100440782299 |
| C | -4.43388339925708 | 0.60251799138947  | -1.43367192687306 |
| C | -4.48319212089023 | 1.70245026565255  | 0.82657014311330  |
| C | -3.87725674095202 | 0.43140769523292  | 1.41088985121235  |
| C | -3.06110329450710 | -0.29717564153375 | 0.35164964698283  |
| N | -3.90323848315624 | -0.58618329613386 | -0.79451905398950 |
| C | -5.24368477535786 | 0.22458911430065  | -2.65859642857471 |
| H | -3.62467700688325 | 1.29327852177069  | -1.73517193794825 |
| H | -5.13042950366535 | 2.20516918611702  | 1.54599124881848  |
| H | -3.68722250161680 | 2.40357863643281  | 0.55726169884074  |
| H | -2.19112258219842 | 0.32576372415002  | 0.08200138124631  |
| H | -2.68167627737712 | -1.23775001038476 | 0.75112943226866  |
| H | -3.42353705688933 | -1.16514315830936 | -1.46987638139560 |
| H | -5.62182341343715 | 2.31048109491165  | -0.90752090827382 |
| F | -6.40311839704665 | 0.66432006929438  | -0.08663869516377 |
| H | -4.67733971223328 | -0.22571430143228 | 1.75479970724826  |
| H | -3.24800066292407 | 0.67171711201563  | 2.26878777219676  |
| H | -6.09576437062751 | -0.38544437166925 | -2.36366549559576 |
| H | -4.63431399441541 | -0.34472721707353 | -3.36182380826713 |
| H | -5.60690228427269 | 1.11606031503440  | -3.17053183802308 |

### 5C\_ae, Water

|   |                   |                   |                   |
|---|-------------------|-------------------|-------------------|
| C | -5.26839011122947 | 1.39119358622293  | -0.43104207356975 |
| C | -4.44113117276307 | 0.59424095558247  | -1.43010232405927 |
| C | -4.48575553206485 | 1.70123537394824  | 0.82742098301644  |
| C | -3.87446537464621 | 0.43372850923709  | 1.41461340255196  |
| C | -3.06789909542224 | -0.30173908109034 | 0.35390744011298  |
| N | -3.91801087580270 | -0.60470399216203 | -0.79069743757974 |
| C | -5.24400397973158 | 0.22893423962717  | -2.66357530861993 |
| H | -3.62313613735496 | 1.27262670844407  | -1.72563267582579 |
| H | -5.13159260651335 | 2.20831698568158  | 1.54534036610042  |
| H | -3.69114831327469 | 2.40125768064672  | 0.55366376407693  |
| H | -2.20779293534620 | 0.32266860897765  | 0.06565544793256  |
| H | -2.67789949920450 | -1.23722159873273 | 0.75486374819855  |
| H | -3.39922859501090 | -1.14320791892761 | -1.47383551915822 |
| H | -5.62681288424886 | 2.30553813582885  | -0.90677010649513 |
| F | -6.41162989281178 | 0.65601119960172  | -0.08036697278088 |
| H | -4.66725801104926 | -0.22157845834616 | 1.78159970316917  |
| H | -3.23442315554006 | 0.68281563122096  | 2.26166489281732  |
| H | -6.11031332800779 | -0.37163546468351 | -2.38721551737684 |
| H | -4.63117348826591 | -0.34668271462041 | -3.35820704784840 |
| H | -5.58813501171164 | 1.12816161354336  | -3.17522476466236 |

### 5C\_aa, Gas Phase

|   |                   |                   |                   |
|---|-------------------|-------------------|-------------------|
| C | -5.29199889287462 | 1.38222403869983  | -0.41680245348370 |
| C | -4.45959108651634 | 0.58307048296515  | -1.41709603237274 |
| C | -4.48426046752409 | 1.72095613795320  | 0.82214261799402  |
| C | -3.86687331718457 | 0.46394076535621  | 1.42965966732401  |
| C | -3.11278844708032 | -0.33108465324904 | 0.36531127613780  |
| N | -3.91028447708604 | -0.62180651085170 | -0.81657174713157 |
| C | -5.23951520275565 | 0.24446056229869  | -2.67300512560704 |
| H | -3.60929254998650 | 1.22001386814188  | -1.69007179029631 |
| H | -5.11710483912111 | 2.23958986396120  | 1.54294792823366  |
| H | -3.69482894500722 | 2.41713060761538  | 0.52224801816024  |
| H | -2.23712091082266 | 0.23903172683439  | 0.03619389195039  |
| H | -2.74090941369922 | -1.27018746057600 | 0.77566165676725  |
| H | -4.67245026114317 | -1.24788198314205 | -0.57852007681072 |
| H | -5.69684498594508 | 2.28345171566444  | -0.88363857613625 |
| F | -6.38502559890737 | 0.60050421635795  | -0.03983455003272 |
| H | -4.66004881701759 | -0.16051756754031 | 1.84684320017519  |
| H | -3.19761866211182 | 0.72946581700227  | 2.24998929653514  |
| H | -6.10008664437311 | -0.37992806275247 | -2.43154615886604 |

### 5C\_aa, Water

|   |                   |                    |                   |
|---|-------------------|--------------------|-------------------|
| C | -5.28063808414466 | 1.39140982779517   | -0.42401818535281 |
| C | -4.45916814686869 | 0.57856319260721   | -1.41878932120211 |
| C | -4.48443413587173 | 1.71653809984316   | 0.82298629431433  |
| C | -3.86882350626748 | 0.45825443056355   | 1.42909415448389  |
| C | -3.10763662913866 | -0.33000573708554  | 0.36732140644511  |
| N | -3.91297383211961 | -0.630861556609139 | -0.81302152896257 |
| C | -5.24326135798392 | 0.24039813091679   | -2.67256868677711 |
| H | -3.60911256335498 | 1.21312589219759   | -1.69392294452612 |
| H | -5.12154309888698 | 2.23444962325179   | 1.54090435349168  |
| H | -3.69325612467576 | 2.41275424952428   | 0.52979740626490  |
| H | -2.24125078669557 | 0.25083400133561   | 0.03416052135539  |
| H | -2.72922413400633 | -1.26531793189588  | 0.78016660915689  |
| H | -4.68335056362328 | -1.23867690902459  | -0.54941624731540 |
| H | -5.66890902884592 | 2.29599103550602   | -0.89455528221184 |
| F | -6.40181558607246 | 0.62465372231128   | -0.05461754125774 |
| H | -4.65768495202241 | -0.17469592154407  | -1.84296880076107 |
| H | -3.20152102017250 | 0.72438144167471   | 2.25045902909053  |
| H | -6.08129386109232 | -0.41650878840960  | -2.43596529669415 |
| H | -4.59908563627552 | -0.26645343747521  | -3.39026460057847 |
| H | -5.63598695188122 | 1.14594663399912   | -3.13593594048547 |

### 5C\_ee, Gas Phase

|   |                   |                   |                   |
|---|-------------------|-------------------|-------------------|
| C | -5.37942591438599 | 1.36889780917727  | -0.44176052417783 |
| C | -4.52398126980586 | 0.58957123999242  | -1.43103406757606 |
| C | -4.57609808845976 | 1.70125565726565  | 0.81425156664057  |
| C | -3.97910242911899 | 0.43377841059431  | 1.39019343599674  |
| C | -3.14128511833474 | -0.33509864745826 | 0.36787623856295  |
| N | -4.00111936798237 | -0.60181240666197 | -0.78045307028470 |
| H | -5.20268448314382 | 2.18039125425628  | 1.56738844861144  |
| H | -3.76910208761307 | 2.39738665959051  | 0.57325465302721  |
| C | -1.82824487117724 | 0.37231395604631  | 0.04034412956215  |
| H | -2.90201139291078 | -1.30174914201104 | 0.81715285584407  |
| H | -3.52559600884837 | -1.19935479517369 | -1.44251768924695 |
| H | -4.77742672620928 | -0.22154921740927 | 1.74667482803629  |
| F | -3.18606845594809 | 0.74776444242101  | 2.48552098578721  |
| H | -5.75094023387065 | 2.28351540686870  | -0.90530770772288 |
| H | -6.24557967175470 | 0.75909568939858  | -0.17366684408430 |
| H | -5.12952145793765 | 0.27301456969064  | -2.28062018146024 |
| H | -3.73688474627922 | 1.25015151063851  | -1.82310865849204 |
| H | -1.98744631117619 | 1.35098097141498  | -0.41088685025365 |
| H | -1.25248713545854 | -0.23268017215946 | -0.66136230772728 |
| H | -1.23554422958471 | 0.51058680770053  | 0.94316082200732  |

### 5C\_ee, Water

|   |                   |                   |                   |
|---|-------------------|-------------------|-------------------|
| C | -5.37715442822765 | 1.36860994849063  | -0.44149023992526 |
| C | -4.52363829277466 | 0.58412224044289  | -1.42739445386748 |
| C | -4.57506245564919 | 1.70319668298761  | 0.81543225049815  |
| C | -3.98749233284174 | 0.43259436251758  | 1.38759935452520  |
| C | -3.14356405619872 | -0.33688839567838 | 0.37357591112717  |
| N | -4.00256409720005 | -0.61446491701741 | -0.77740252317653 |
| H | -5.20538981267478 | 2.18375666979071  | 1.56468607948219  |
| H | -3.7663336847980  | 2.39544252143208  | 0.56910281860651  |
| C | -1.83583072370508 | 0.37429533685362  | 0.03430048624648  |
| H | -2.89674937173146 | -1.30020654081265 | 0.82564213015002  |
| H | -3.49220992494860 | -1.17949504678985 | -1.44495252482675 |
| H | -4.78605661787454 | -0.21749029442963 | 1.75089936724159  |
| F | -3.19112204561220 | 0.74435382179379  | 2.49649178334658  |
| H | -5.74092955397503 | 2.28414667509889  | -0.90854141026806 |
| H | -6.24934183171206 | 0.76790293246082  | -0.17027449805896 |
| H | -5.12620344194721 | 0.27097093305846  | -2.28007784079616 |
| H | -3.72949764866809 | 1.23665533182440  | -1.81411073361723 |
| H | -1.99994125690930 | 1.35933473708790  | -0.40101667839854 |
| H | -1.27733841007266 | -0.22612618226161 | -0.68489079750101 |
| H | -1.22413032879717 | 0.49574918315016  | 0.92752151921208  |

### 5C\_ea, Gas Phase

|   |                   |                   |                   |
|---|-------------------|-------------------|-------------------|
| C | -5.38878697421703 | 1.38424494015091  | -0.42960621815286 |
| C | -4.54905379996220 | 0.56642038600689  | -1.40850048540025 |
| C | -4.57469076841789 | 1.71478953698938  | 0.82082290441949  |
| C | -3.98628958447234 | 0.44760783861697  | 1.40907845525799  |
| C | -3.16410006109727 | -0.34271490406799 | 0.38676841145193  |
| N | -3.95835523088080 | -0.62030805405434 | -0.80779344841620 |
| H | -5.19043684772246 | 2.20824177553169  | 1.57340957449696  |
| H | -3.76096587083899 | 2.39905720579667  | 0.56949305149249  |
| C | -1.85761797806821 | 0.35584979852346  | 0.03377683199966  |
| H | -2.91245570501641 | -1.30687097397401 | 0.83333821508601  |
| H | -4.68183835974062 | -1.29655711154861 | -0.59742028989489 |
| H | -4.79412833977571 | -0.19403396354255 | 1.77701653067708  |
| F | -3.19626398429087 | 0.76538463621331  | 2.50597742690022  |
| H | -5.74615988076084 | 2.30035714136422  | -0.90353008565833 |
| H | -6.27255768646245 | 0.80172801325062  | -0.15088170043942 |
| H | -5.14603108361518 | 0.2536902659762   | -2.2655299431188  |
| H | -3.74219795113776 | 1.18752077282383  | -1.8057289374785  |
| H | -2.01773930924804 | 1.33998503753428  | -0.40519610799710 |
| H | -1.30800752602110 | -0.24847975994978 | -0.68608975124239 |
| H | -1.25016305825384 | 0.48764365773742  | 0.92725860347933  |

### 5C\_ea, Water

|   |                   |                   |                   |
|---|-------------------|-------------------|-------------------|
| C | -5.38431939360078 | 1.38219469729783  | -0.43035413348782 |
| C | -4.54569716788534 | 0.56757408474092  | -1.41060106131321 |
| C | -4.57118572251492 | 1.71365067706049  | 0.82089324043763  |
| C | -3.99306104909419 | 0.44128596563895  | 1.40037834755582  |
| C | -3.16045140008838 | -0.34417103323869 | 0.38585640083501  |
| N | -3.95947454697882 | -0.62752603812583 | -0.80843695198422 |
| H | -5.19278340954683 | 2.20363940632393  | 1.57122185101900  |
| H | -3.75703131018718 | 2.39701362892555  | 0.56742483723428  |
| C | -1.85818216346995 | 0.36109355024955  | 0.03040488182185  |
| H | -2.90930117549152 | -1.30688545526677 | 0.83532879745479  |
| H | -4.70360829267601 | -1.27279553712647 | -0.56599597854777 |
| H | -4.79881192258949 | -0.20078552787011 | 1.76586876797291  |
| F | -3.20067754582278 | 0.75278853999930  | 2.51424778833870  |
| H | -5.73905953888885 | 2.29873559279117  | -0.90443434060576 |
| H | -6.26582743349618 | 0.79748305590258  | -0.15107523662110 |
| H | -5.14829158705804 | 0.25597633245979  | -2.26392605780702 |
| H | -3.73780472072005 | 1.18819115237703  | -1.80563371227918 |
| H | -2.02443166423443 | 1.36147396860786  | -0.41472180380885 |
| H | -1.29869870847432 | -0.24412091084909 | -0.68241672589120 |
| H | -1.24914125018195 | 0.49874385010201  | 0.92261108967612  |

### 6A\_a, Gas Phase

|   |                   |                   |                   |
|---|-------------------|-------------------|-------------------|
| C | -5.58116969620360 | 1.05703266168691  | 0.11361930661183  |
| C | -4.84870271723792 | 0.68413667980728  | -1.17069919150009 |
| C | -4.61504077111808 | 1.48403400577474  | 1.20175642704247  |
| C | -3.52419661247637 | 0.43692273549356  | 1.40232830739513  |
| C | -2.85726283127750 | 0.08717560017572  | 0.07358432243895  |
| N | -3.88080957597255 | -0.35964953773765 | -0.89161949902441 |
| C | -4.18484250260682 | -1.66968237774537 | -1.05123950347371 |
| O | -3.68959805930751 | -2.58459615328182 | -0.44959023747009 |
| C | -5.19703770986528 | -2.03023240495704 | -2.18428095281321 |
| F | -4.92711869300325 | -1.36684162451054 | -3.31707223427671 |
| F | -6.45875100949551 | -1.75416814763754 | -1.84353312894964 |
| H | -5.12177028834001 | -3.32142155006953 | -2.44464588229054 |
| H | -2.48436077335003 | 1.01944752779629  | -0.36612476592523 |
| C | -1.65882831743285 | -0.82959517313756 | 0.25365986437504  |
| H | -6.31627976049219 | 0.83666715866187  | -0.09318229308329 |
| F | -6.27360958157742 | -1.06401972277021 | 0.54461081017138  |
| H | -5.16567756617331 | 1.66588835531328  | 2.12454061486151  |
| H | -4.16503569704806 | 2.43420824502454  | 0.89801555376264  |
| H | -3.94412760076330 | -0.47479802984822 | 1.83245839705600  |
| H | -2.76706861959337 | 0.80772109199500  | 2.09562955886100  |
| H | -5.56142241158214 | 0.36831726780494  | -1.92348096394208 |
| H | -4.32270159769443 | 1.66180394221118  | -1.55340636778592 |
| H | -1.88680799530746 | -1.67480923119393 | 0.89601431379847  |
| H | -0.86054685574681 | -0.24526091909342 | 0.71383550277529  |
| H | -1.29623275633421 | -1.21318039976248 | -0.69827795861479 |

### 6A\_a, Chloroform

|   |                   |                   |                   |
|---|-------------------|-------------------|-------------------|
| C | -5.57766036979628 | 1.06630972241095  | 0.11108946195768  |
| C | -4.84968314838212 | 0.67829923371440  | -1.16861519639491 |
| C | -4.61501440314451 | 1.48567709496407  | 1.20201220886475  |
| C | -3.52375135790583 | 0.44014930178378  | 1.40751418828625  |
| C | -2.85922953506792 | 0.08022292892812  | 0.08116585373773  |
| N | -3.89283647228796 | -0.37690809976505 | -0.87468539968642 |
| C | -4.17530051551430 | -1.67387211711300 | -1.06836165222088 |
| O | -3.66234683799733 | -2.61031599583636 | -0.50009276393496 |
| C | -5.20297089939245 | -2.02469754410633 | -2.19042671551038 |
| F | -4.95782606022672 | -1.35686426399661 | -3.32328322128534 |
| F | -6.46221620829130 | -1.76695640953809 | -1.82700903223551 |
| F | -5.12495295824394 | -3.31775336223386 | -2.46430704935949 |
| H | -2.49390114898366 | 1.00797908841238  | -0.37033013677502 |
| H | -1.65691235579446 | -0.82897474624604 | 0.26412086053389  |
| H | -6.30586386739165 | 1.84814115747764  | -0.10255744032296 |
| H | -6.28866145791973 | -0.05482853367917 | 0.54451464445622  |
| F | -5.16765140790269 | 1.66996588915622  | 2.1231562326528   |
| H | -4.16388389362411 | 2.43407091820469  | 0.89707769667679  |
| H | -3.93717833732851 | -0.46801344112064 | 1.85237255935949  |
| H | -2.76312551206106 | 0.82141456869476  | 2.09067232446079  |
| H | -5.56550926548912 | 0.36971591543353  | -1.92070190980404 |
| H | -4.31134115942141 | 1.54618510384682  | -1.55204186839843 |
| H | -1.87515241447506 | -1.66718485584847 | 0.91966694435658  |
| H | -0.86486537833785 | -0.23151131260559 | 0.71771753354732  |
| H | -1.29116503502000 | -1.21515024093815 | -0.68576812557443 |

### 6A\_e, Gas Phase

|   |                   |                   |                   |
|---|-------------------|-------------------|-------------------|
| C | -5.44674043076812 | 1.23782193434707  | 0.28646800158793  |
| C | -4.99781398869235 | 0.60180021160314  | -1.03017045433333 |
| C | -4.27334780118878 | 1.66502302029042  | 1.16401718158554  |
| C | -3.34932703409851 | 0.48884101719549  | 1.38731231803956  |
| C | -2.88761645440569 | -0.10162785231361 | 0.06345830631540  |
| N | -4.03437857948094 | -0.47177395604968 | -0.74240020108559 |
| C | -4.22622740121422 | -1.66785801756657 | -1.33774267224362 |
| O | -5.11789426382564 | -1.91557019461932 | -2.10896911001352 |
| C | -3.24798201164196 | -2.82190714445579 | -0.98575422250198 |
| F | -3.20852434970376 | -3.04547319393546 | 0.33444806608727  |
| F | -2.00236933387380 | -2.55251689997230 | -1.39493439906010 |
| F | -3.63702323925793 | -3.93403209762871 | -1.57417685017220 |
| H | -5.85301908149740 | -1.1528298080375  | -1.49156908786541 |
| C | -4.43715808373047 | 1.61158087716786  | -2.02568975646175 |
| H | -2.29149299104788 | 0.64997270315925  | -0.46220473351688 |
| H | -2.24890843065245 | -0.95620960547468 | 0.24955064025773  |
| H | -6.08345145140216 | 2.09530024195046  | 0.06462430994121  |
| H | -6.06222080323230 | 0.51573403968132  | 0.82790077799608  |
| H | -4.62808573397015 | 2.04628373560647  | 2.12135691457729  |
| H | -3.70022854089462 | 2.46351823538774  | 0.68627935703659  |
| H | -3.84631071681829 | -0.28663390787766 | 1.97772932722371  |
| F | -2.22480053324549 | 0.89348381731771  | 2.08071362438308  |
| H | -3.56526008434370 | 2.13969789466399  | -1.64013278072661 |
| H | -5.19958980332600 | 2.35613648755941  | -2.25638483410831 |
| H | -4.15838885768740 | 1.11313567315968  | -2.95329972294220 |

### 6A\_e, Chloroform

|   |                   |                   |                   |
|---|-------------------|-------------------|-------------------|
| C | -5.44630074568741 | 1.23646398577490  | 0.28407529752736  |
| C | -4.99952493959730 | 0.60607222293411  | -1.03533588336736 |
| C | -4.27304927152965 | 1.66364381358728  | 1.16184257423276  |
| C | -3.35742108267758 | 0.48300548040463  | 1.38062862435540  |
| C | -2.88824774421214 | -0.09996459405276 | 0.05647674353877  |
| N | -4.03522699047718 | -0.47359210112803 | -0.75208283668830 |
| C | -4.22901825480661 | -1.66809204514129 | -1.32476474027089 |
| O | -5.13098581962637 | -1.93730242170994 | -2.08847974522739 |
| C | -3.24356662882626 | -2.81822458626209 | -0.97767662080466 |
| F | -3.19148347153844 | -3.04613143551515 | 0.33921299934251  |
| F | -2.00343035325042 | -2.55547253067261 | -1.40210323167551 |
| F | -3.63984144101706 | -3.93518743428454 | -1.56325581215922 |
| H | -5.85875741961260 | 0.12768467856796  | -1.49582092879363 |
| H | -4.43119728302144 | 1.61810092353292  | -2.02297466791014 |
| H | -2.30281666438092 | 0.65672977626725  | -0.47170094384748 |
| H | -2.24300004508301 | -0.94992953416987 | 0.24033805313664  |
| H | -6.08102308189517 | 2.09473014810430  | 0.06158796481246  |
| H | -6.06019493437447 | 0.51347953248796  | 0.82547742479247  |
| H | -4.63257257948435 | 2.04016071955692  | 2.11919107244572  |

|   |                   |                   |                   |
|---|-------------------|-------------------|-------------------|
| H | -3.69953380058668 | 2.46155457010843  | 0.68374082110130  |
| H | -3.85331417042980 | -0.29073169814715 | 1.97186514751044  |
| F | -2.22399834656494 | 0.88170507093174  | 2.08001380811437  |
| H | -3.56525562449468 | 2.14700016854847  | -1.62571398194289 |
| H | -5.19687503832450 | 2.35916069616879  | -2.25362246457319 |
| H | -4.14152426850103 | 1.12514659410775  | -2.95048867364954 |

|   |                   |                  |                   |
|---|-------------------|------------------|-------------------|
| H | -1.29790881597081 | 0.41772631435215 | 0.86679640959976  |
| H | -2.19441245949416 | 1.33674067205028 | -0.32746466007058 |

### 6B\_a, Gas Phase

|   |                   |                   |                    |
|---|-------------------|-------------------|--------------------|
| C | -5.42984278330012 | 1.23729709461387  | -0.39047107285102  |
| C | -4.60936816777374 | 0.48922240993774  | -1.42891104863178  |
| C | -4.63785244520150 | 1.56321550151633  | 0.87125339341951   |
| C | -3.98925893628778 | 0.31218659065491  | 1.42720631843646   |
| C | -3.11332568225452 | -0.36905274771728 | 0.39234575263843   |
| N | -3.98788343476695 | -0.72272081307758 | -1.626532371834165 |
| H | -3.46796152889987 | -1.26203846559551 | -1.45829883692731  |
| H | -4.74107059193526 | -1.32530962829827 | -0.41671088674228  |
| C | -5.42671808380552 | 0.03002819724939  | -2.61402229540783  |
| H | -3.75915036677445 | 1.09482149154819  | -1.75000181339660  |
| H | -2.32875334817228 | 0.29508679353105  | 0.03392163880267   |
| H | -2.67499821318138 | -1.26352154468362 | 0.78350301266941   |
| H | -6.30792425135360 | 0.63943265167057  | -0.13319724576567  |
| H | -5.79999052529969 | 2.15118088833127  | -0.85405657145649  |
| H | -5.29059026614192 | 1.99748081330151  | 1.62685560483631   |
| H | -3.85562004822706 | 2.29703146635322  | 0.66127620333052   |
| H | -3.41040304686221 | 0.51662830060430  | 2.32676618220262   |
| F | -4.97893016610702 | -0.60880592919518 | 1.74470037631639   |
| H | -4.82216763901074 | -0.49753473547509 | -3.35178791127810  |
| H | -5.86538056004365 | 0.89820454225094  | -3.10268109520432  |
| H | -6.24527991460073 | -0.61638287752075 | -2.29254598664930  |

### 6B\_e, Water

|   |                   |                   |                   |
|---|-------------------|-------------------|-------------------|
| C | -5.53213091694137 | 1.16852930752267  | -0.35302351298903 |
| C | -4.69167877551452 | 0.43009237820069  | -1.38230634677981 |
| C | -4.72681564955762 | 1.54691246742939  | 0.86842477910518  |
| C | -4.06935659559547 | 0.29847433754594  | 1.45476088283210  |
| C | -3.20304456956059 | -0.43697606429605 | 0.44235817406299  |
| N | -4.05865233958639 | -0.75944262737475 | -0.75553000949348 |
| H | -3.49635704541162 | -1.24735524339213 | -1.45391194365405 |
| H | -4.78239207395234 | -1.42321092235082 | -0.47316135443012 |
| C | -1.96362161864470 | 0.32370380473739  | 0.01632868297521  |
| H | -2.91219253891112 | -1.40629419258624 | -0.84141272840719 |
| H | -6.39544066997997 | 0.56181060331207  | -0.07047945538149 |
| F | -6.01691528255678 | 2.30743603441315  | -0.98126145029315 |
| H | -5.38028470457312 | 2.00507471659790  | 1.60969408648374  |
| H | -3.97736097949612 | 2.28698879511548  | 0.58231409177177  |
| H | -3.44247209299115 | 0.56640720636279  | 2.30414746107577  |
| H | -4.83821386418722 | -0.38224356663921 | -1.45391194365405 |
| H | -5.29876148346612 | 0.08514532639592  | -2.21380803313863 |
| H | -3.89923307564244 | 1.07506751416398  | -1.75466893179034 |
| H | -1.42870455875257 | -0.20667167808294 | -0.77111615217655 |
| H | -1.30471984922306 | 0.40629389868457  | 0.87931739553618  |
| H | -2.18548631545569 | 1.33151790424020  | -0.32949378207755 |

### 6B\_a, Water

|   |                   |                   |                   |
|---|-------------------|-------------------|-------------------|
| C | -5.44911886840393 | 1.21462318226168  | -0.38274985430187 |
| C | -4.61318225227120 | 0.48635958733064  | -1.42082313350980 |
| C | -4.64492922010606 | 1.56366967545286  | 0.86322189185161  |
| C | -3.97479113867314 | 0.33238271532328  | 1.43139406767604  |
| C | -3.14744090768598 | -0.39194781635836 | 0.39476482899785  |
| N | -3.99893345578832 | -0.72442184043128 | -0.77756395456603 |
| H | -3.44257461432395 | -1.23120509103407 | -1.46665076744122 |
| H | -4.74053963884233 | -1.36582666697738 | -0.48439749176341 |
| C | -5.41532598397418 | 0.04892082803943  | -2.62381424770613 |
| H | -3.76624001446684 | 1.10359286887655  | -1.72395162988501 |
| H | -2.33877213803273 | 0.24628599690679  | 0.04509088472660  |
| H | -2.73973786181270 | -1.31815613651656 | 0.78809129048503  |
| H | -6.30589734693042 | 0.59000589043558  | -0.11683491552867 |
| H | -5.84331541495944 | 2.11882003066791  | -0.84494915953266 |
| H | -5.28276212932979 | 2.01193263756259  | 1.62392783864160  |
| H | -3.86459292266972 | 2.28853124273686  | 0.62022239259147  |
| H | -3.34685793781866 | 0.57311349032882  | 2.28714555212163  |
| F | -4.96134580911472 | -0.55940574841392 | 1.86813062793135  |
| H | -4.79108713935075 | -0.47144098764615 | -3.34919194187097 |
| H | -5.84336305082800 | 0.92782235149380  | -3.10282480321288 |
| H | -6.23166215461711 | -0.60720621003906 | -2.31841747568686 |

### 6C\_ae, Gas Phase

|   |                   |                   |                   |
|---|-------------------|-------------------|-------------------|
| C | -5.44386598600272 | 1.21049820565204  | -0.39150518759749 |
| C | -4.57948054738933 | 0.48376218630107  | -1.41832018357992 |
| C | -4.64620243775690 | 1.55943203805268  | 0.85914264301716  |
| C | -3.97906490201820 | 0.32165821745093  | 1.42840263232743  |
| C | -3.17433296911227 | -0.39778811807579 | 0.36030195049753  |
| N | -4.00090332404159 | -0.69322017481971 | -0.78983838452569 |
| H | -3.49661070585005 | -1.25152861740122 | -1.46485548129566 |
| C | -5.40040714841048 | 0.05753716887908  | -2.62131639055294 |
| H | -3.79122795777344 | 1.18453352717844  | -1.74929726691535 |
| H | -2.31604337350829 | 0.25316749324062  | 0.12004856455378  |
| H | -2.78435305114937 | -1.32854442159632 | 0.77192213222486  |
| H | -6.27577221108910 | 0.55644913624665  | -0.12053646130944 |
| H | -5.86145145160371 | 2.11377124183725  | -0.83998856660609 |
| H | -5.27978986268810 | 2.01537666490062  | 1.62062607647576  |
| H | -3.86118427795339 | 2.28084809762439  | 0.61266587240772  |
| H | -3.32379400195373 | 0.58307438712250  | 2.26242771070228  |
| F | -4.95258313968440 | -0.52780504464249 | 1.93297796761044  |
| H | -4.78657175602799 | -0.46958918015278 | -3.35372410218301 |
| H | -5.84731970684160 | 0.92205817406993  | -3.11239238150469 |
| H | -6.19757118914535 | -0.61342098186789 | -2.29873113474669 |

### 6B\_e, Gas Phase

|   |                    |                   |                   |
|---|--------------------|-------------------|-------------------|
| C | -5.53424450992260  | 1.18323789711790  | -0.36093502076935 |
| C | -4.69772052653869  | 0.42628067287230  | -1.38895420750602 |
| C | -4.72951027785184  | 1.53962943488949  | 0.87236585100132  |
| C | -4.07012846924052  | 0.29167306785780  | 1.45797380414411  |
| C | -3.19547052358912  | -0.44035109796523 | 0.44924864645681  |
| N | -4.06270525061734  | -0.77207024675220 | -0.75599178137005 |
| H | -3.49901896572808  | -1.26347959316140 | -1.45168874021928 |
| H | -4.79308305324137  | -1.42375615828227 | -0.46022149430425 |
| C | -1.96518436510819  | 0.32846791684166  | 0.01077940817542  |
| H | -2.89503957562696  | -1.40886048469863 | 0.84806324889101  |
| H | -6.40966383052140  | 0.58593312629042  | -0.08200787554106 |
| F | -5.97925545597350  | 2.31142798153733  | -0.99246309867569 |
| H | -5.38629883272057  | 1.99450530460969  | 1.61234342751899  |
| H | -3.98655683841150  | 2.29145083704553  | 0.60149894507147  |
| H | -3.44601694186210  | 0.55919599210535  | 2.31016003979068  |
| H | -4.83355820053370  | -0.39129412680119 | 1.84161216619640  |
| H | -5.308327411619890 | 0.08927308248759  | -2.22294196283930 |
| H | -3.90220034259010  | 1.06605313666200  | -1.76418116986791 |
| H | -1.41748534285853  | -0.19052372905857 | -0.77664193568248 |

### 6C\_ae, Water

|   |                   |                   |                   |
|---|-------------------|-------------------|-------------------|
| C | -5.44770766586366 | 1.20886331572973  | -0.39039410373948 |
| C | -4.58730050884607 | 0.47211825678826  | -1.41218888987446 |
| C | -4.65197086145248 | 1.55563505270879  | 0.86270571743938  |
| C | -3.96815740398714 | 0.32804906710731  | 1.42605842934333  |
| C | -3.17340891970226 | -0.39633542157358 | 0.35955650934391  |
| N | -4.01498017451758 | -0.71470415735628 | -0.78180265233987 |
| H | -3.47536592200286 | -1.23383018159670 | -1.46401656559683 |
| C | -5.40235980403620 | 0.05829716411640  | -2.62325002484527 |
| H | -3.78694151746836 | 1.15889738038880  | -1.73496713139247 |
| H | -2.33141301114602 | 0.26139606414504  | 0.09481491947504  |
| H | -2.76114671792158 | -1.31660873280228 | -0.77309310698258 |
| H | -6.29467060100419 | 0.56946980843228  | -0.12647251585832 |
| H | -5.85065301871138 | 2.11641380054385  | -0.84307066049602 |
| H | -5.28524707169494 | 2.00889099082188  | 1.62634849461593  |
| H | -3.87005823343604 | 2.27965691013988  | 0.61703839868103  |
| H | -3.31826547567952 | 0.58727177781852  | 2.26201118776707  |
| F | -4.94555646185723 | -0.54014110816371 | 1.93998660771693  |
| H | -4.78939829469738 | -0.49030346096380 | -3.34029527100387 |
| H | -5.81676045698639 | 0.93322919624499  | -3.12487188463889 |
| H | -6.22716787900671 | -0.58599572252938 | -2.31227367157971 |

### 6C\_aa, Gas Phase

|   |                   |                   |                   |
|---|-------------------|-------------------|-------------------|
| C | -5.45339944700565 | 1.23202317127429  | -0.38175095390784 |
| C | -4.60745292417157 | 0.45722134919513  | -1.39513526188251 |
| C | -4.64438481936257 | 1.57227542929950  | 0.86709864315813  |
| C | -3.98202553254370 | 0.33225165495591  | 1.43667438602061  |
| C | -3.19324434741328 | -0.40528635565552 | 0.36737025139501  |
| N | -3.98168535676895 | -0.72219413471120 | -0.80639749647684 |
| H | -4.69786345214589 | -1.39738687963513 | -0.56002902494253 |
| C | -5.41542080256489 | 0.04565355006745  | -2.61148363275872 |
| H | -3.78655329832997 | 1.10850131243733  | -1.72226124484775 |
| H | -2.35252249389726 | 0.22731472810127  | 0.06350662820966  |
| H | -2.77723559096311 | -1.32328063101730 | 0.78268033055976  |
| H | -6.31129380827834 | 0.61331945923704  | -0.10249886404308 |
| H | -5.84626802520996 | 2.14350379063977  | -0.83707884693460 |
| H | -5.27016801528627 | 2.03649771553820  | 1.62991537410382  |
| H | -3.85442943468436 | 2.28673991834160  | 0.61557507378755  |
| H | -3.34510976496426 | 0.57933509910205  | 2.28874257197751  |
| F | -4.97349454504485 | -0.52865343553963 | 1.90841296948798  |
| H | -4.78068410839440 | -0.46095357062738 | -3.33716880983611 |
| H | -5.87530725185686 | 0.91191597753423  | -3.08729633707649 |
| H | -6.21406698111386 | -0.64014814853760 | -2.31867575599353 |

### 6C\_aa, Water

|   |                   |                   |                   |
|---|-------------------|-------------------|-------------------|
| C | -5.45877270347251 | 1.22042138840622  | -0.38254759340352 |
| C | -4.60842199825778 | 0.45331439920677  | -1.39595644120832 |
| C | -4.64927783712891 | 1.56817974900165  | 0.86390247737977  |
| C | -3.96810074884355 | 0.34252592197618  | 1.43511407431059  |
| C | -3.19584733619796 | -0.41260858652893 | 0.36953216358631  |
| N | -3.99318488191023 | -0.73566444528695 | -0.80290769984945 |
| H | -4.72716310335721 | -1.38619353116583 | -0.53741266877289 |
| C | -5.40969625629847 | 0.05410198637267  | -2.62098648534258 |
| H | -3.78272146914369 | 1.10417211339426  | -1.70861528509635 |
| H | -2.35467989243137 | 0.21496537782598  | 0.05968438940215  |
| H | -2.78380339099356 | -1.32867574515414 | 0.79318975987633  |
| H | -6.31490061941216 | 0.59590063419373  | -0.10842263858079 |
| H | -5.85402137077274 | 2.13027578208376  | -0.83823323657151 |
| H | -5.27409071297961 | 2.03087090649086  | 1.628753552188066 |
| H | -3.86571781312383 | 2.28695521904444  | 0.60711236299441  |
| H | -3.31984624661068 | 0.60003485174100  | 2.27322390425941  |
| F | -4.95535435290200 | -0.52255767053413 | 1.94516670036025  |
| H | -4.77155055586253 | -0.43379001457458 | -3.35793347268335 |
| H | -5.87095931075102 | 0.92763671853029  | -3.08236869258020 |
| H | -6.20449939955019 | -0.64121505502321 | -2.34009513996088 |

### 6C\_ee, Gas Phase

|   |                   |                   |                   |
|---|-------------------|-------------------|-------------------|
| C | -5.54247238533095 | 1.15231455046734  | -0.36024583551627 |
| C | -4.66740153177576 | 0.43769317177310  | -1.37497042907554 |
| C | -4.73837879830879 | 1.54109684832817  | 0.86168770327662  |
| C | -4.04811086992162 | 0.30761376062924  | 1.44344294895687  |
| C | -3.21476142898492 | -0.43458830415035 | 0.39629101607909  |
| N | -4.07482599515244 | -0.73002659563046 | -0.74700957838392 |
| H | -3.58551103142044 | -1.29405875386683 | -1.42786751048050 |
| C | -1.92635707574210 | 0.31025716732515  | 0.04107548523903  |
| H | -2.93178337997263 | -1.39916767350523 | 0.82447997428446  |
| H | -6.37882835706007 | 0.50734199376009  | -0.07854610718541 |
| F | -6.07332726853437 | 2.28912842365704  | -0.95191176397963 |
| H | -5.38844703733433 | 2.00502297597963  | 1.60435569283409  |
| H | -4.00377358509513 | 2.29167932008149  | 0.55940379828924  |
| H | -3.41475062921515 | 0.59395665607353  | 2.28435469687124  |
| H | -4.80599242977394 | -0.37953541578594 | 1.82605242059704  |
| H | -5.28047358821667 | 0.11286373355454  | -2.21535479122424 |
| H | -3.93701750592503 | 1.16581771357176  | -1.75599561968292 |
| H | -1.35895559447937 | -0.24927423263242 | -0.70427522594220 |
| H | -1.29709321975691 | 0.42805053401659  | 0.92436727825836  |
| H | -2.12245828799938 | 1.30327412635356  | -0.36283415321540 |

### 6C\_ee, Water

|   |                   |                  |                   |
|---|-------------------|------------------|-------------------|
| C | -5.54092513135678 | 1.14358786507266 | -0.35506059061375 |
| C | -4.66728651129886 | 0.43591376590582 | -1.37289721373901 |
| C | -4.73872765783219 | 1.54413765661385 | 0.86091317371922  |
| C | -4.05002411936986 | 0.30988190255404 | 1.44460124912695  |

|   |                   |                   |                   |
|---|-------------------|-------------------|-------------------|
| C | -3.21837595858194 | -0.43589772271245 | 0.39948003446054  |
| N | -4.07729425188499 | -0.73961369387911 | -0.74919766757836 |
| H | -3.55508978301749 | -1.26560048422642 | -1.43884484801956 |
| C | -1.93208381785645 | 0.30670916003994  | 0.03707329364252  |
| H | -2.93197044022333 | -1.39794917931881 | 0.83003719589681  |
| H | -6.38201357472973 | 0.50672786767414  | -0.07248706760328 |
| F | -6.08249327628414 | 2.28655597746917  | -0.95648743210904 |
| H | -5.38740639720352 | 2.00786371391077  | 1.60498620680570  |
| H | -3.99944028426385 | 2.28843961682828  | 0.55400393258827  |
| H | -3.41330319183968 | 0.59963040616549  | 2.28136647070973  |
| H | -4.80995525572416 | -0.37118295408867 | 1.83524856549503  |
| H | -5.27513876099341 | 0.11690255145629  | -2.21940599494624 |
| H | -3.92768073745031 | 1.15967960983948  | -1.74190450181865 |
| H | -1.37443138959747 | -0.25517920155034 | -0.71389956779671 |
| H | -1.29985028913345 | 0.41606736509887  | 0.91943449635934  |
| H | -2.12722917135836 | 1.30278577714700  | -0.36045973457950 |

### 6C\_ee, Gas Phase

|   |                   |                   |                   |
|---|-------------------|-------------------|-------------------|
| C | -5.54440723888623 | 1.17020819480989  | -0.34890718307124 |
| C | -4.69277956707711 | 0.41010581173302  | -1.35543569442041 |
| C | -4.73353825569315 | 1.55299347898607  | 0.87204442370987  |
| C | -4.05939212005589 | 0.31658351787855  | 1.46739907643532  |
| C | -3.23937079309129 | -0.44087697265642 | 0.41401351372199  |
| N | -4.03407367044534 | -0.74815708133641 | -0.77587249058354 |
| H | -4.71642803532003 | -1.46331463010470 | -0.55757548550825 |
| H | -1.96190006654365 | 0.30129789960618  | 0.03381454891200  |
| H | -2.93982886825799 | -1.40262836659671 | 0.83585024720096  |
| H | -6.40259384383940 | 0.55603674531154  | -0.05472068558662 |
| F | -6.04929221145448 | 2.31358756746080  | -0.95175470156284 |
| H | -5.37745611279836 | 2.03517710500102  | 1.60815523094553  |
| H | -3.98617347996675 | 2.28863407699940  | 0.56519564361671  |
| H | -3.42658429595205 | 0.60030734019731  | 2.31074635551012  |
| H | -4.82613228286963 | -0.35883675084442 | 1.85886266375077  |
| H | -5.30364170509496 | 0.08954051283134  | -2.19909545299389 |
| H | -3.93806806062747 | 1.09503519604241  | -1.75014670093349 |
| H | -1.41668743691877 | -0.25789802020393 | -0.72512896859275 |
| H | -1.32144044238084 | 0.41998793193341  | 0.90835950612597  |
| H | -2.16262151272661 | 1.29663644295165  | -0.36208384667622 |

### 6C\_ee, Water

|   |                   |                   |                   |
|---|-------------------|-------------------|-------------------|
| C | -5.54156320996501 | 1.15963517532666  | -0.34450173447452 |
| C | -4.69044155164937 | 0.41340279012376  | -1.35845518619382 |
| C | -4.73187797842051 | 1.55307348976419  | 0.86997070355518  |
| C | -4.05859295230785 | 0.31405450821670  | 1.46193538796901  |
| C | -3.23612212878166 | -0.44080245617755 | 0.41061813981079  |
| N | -4.03657511503399 | -0.75293740221406 | -0.78047117141595 |
| H | -4.74207201006211 | -1.43701597077448 | -0.52953683184968 |
| C | -1.95921801368042 | 0.30230333888881  | 0.03239848652903  |
| H | -2.94050723108487 | -1.40208881678630 | 0.83513139216668  |
| H | -6.39833546504410 | 0.54592941598949  | -0.05386728077639 |
| F | -6.06010680424484 | 2.31071446253020  | -0.95438282115622 |
| H | -5.37602272688595 | 2.02936706038698  | 1.60992056454410  |
| H | -3.98247599075464 | 2.28658386736046  | 0.56163323855760  |
| H | -3.42590238592486 | 0.59612625051633  | 2.30541607101500  |
| H | -4.82698603331468 | -0.36216565541205 | 1.84705021196341  |
| H | -5.30448788668738 | 0.09621177258863  | -2.20126923132313 |
| H | -3.93229827542435 | 1.100159196661249 | -1.74390317490221 |
| H | -1.40001864181584 | -0.26028173207632 | -0.71534488564884 |
| H | -1.32875576347980 | 0.42757303853302  | 0.91333426076533  |
| H | -2.16004983543777 | 1.29457766660304  | -0.37195613913539 |

### 7A\_a, Gas Phase

|   |                   |                   |                   |
|---|-------------------|-------------------|-------------------|
| C | -5.46371274550601 | 1.57921187873227  | 0.40971136785179  |
| C | -4.96830282732472 | 0.98180006697679  | -0.90338122829461 |
| C | -4.33058161546097 | 2.21919245713745  | 1.18887768272937  |
| C | -3.17451119741827 | 1.23950952738996  | 1.37767259022446  |
| H | -4.70504440005897 | 2.56633346637615  | 2.15129649391743  |
| H | -3.99196361631863 | 3.09933049158707  | 0.63426812128283  |
| C | -2.77427036605278 | 0.65411484181187  | 0.02623864104449  |
| N | -3.91501555378476 | 0.01570750784429  | -0.63246513535212 |
| C | -4.21075172806306 | -1.29337761601261 | -0.40110942235306 |
| O | -3.56680595207382 | -2.02526818867308 | 0.29341526810936  |
| C | -5.41378362119894 | -1.89724229577402 | -1.18994399319338 |

F -5.39585229496729 -1.51724767043493 -2.47340835971453  
 F -6.58973451647026 -1.53172191183362 -0.67485041638981  
 F -5.34215882332285 -3.21231340421090 -1.15057337361080  
 H -6.26592978694241 2.29272802863718 0.21440989999877  
 F -5.99556391757406 0.54877249306903 1.16773388296503  
 H -2.50314425102836 1.47830887072347 -0.640355662204319  
 C -1.46794136882766 -0.14625468082415 0.12623553528175  
 H -3.46815771202974 0.42501196528139 2.04017557819396  
 H -2.31878177292974 1.74385170420382 1.82736141284661  
 H -5.78907839487356 0.51357361250153 -1.43432955601232  
 H -4.56939670522351 1.77595231578962 -1.53781585576294  
 F -1.32931535522057 -0.83532380753479 1.25015730490875  
 F -0.46246629296870 0.75340268226591 0.11627989976898  
 F -1.28102518436216 -0.95596233502972 -0.90931971639680

C -3.08830896219848 1.25082544888850 1.36099264909939  
 H -4.39159548586360 2.78409704621181 2.09739739910898  
 H -3.67824259699270 3.10920512272767 0.51832115121792  
 C -2.76112705072593 0.54322793041174 0.05527199977157  
 N -3.97746430906775 -0.02022987249067 -0.51709661015328  
 C -4.22505258556281 -1.33711584995037 -0.68101344074186  
 O -5.24605577253491 -1.79373406732937 -1.13339375027230  
 C -3.13260769882883 -2.35007757723728 -0.23613064036167  
 F -2.00287799599031 -2.20111248327587 -0.93054182648352  
 F -3.57020837505351 -3.58053320719309 -0.42979510907632  
 F -2.84645497186516 -2.21688155455738 1.06294702049379  
 H -6.07556630684408 2.53364865339905 0.23488585930338  
 H -5.87118081120639 1.08363083776604 1.19482992395360  
 H -5.95654278656124 0.30725788339369 -0.99396883085079  
 C -4.85565301372674 1.74244621998880 -2.01438488334045  
 H -2.33270140427310 1.26210061398722 -0.64338151981024  
 H -2.02285650565947 -0.23011140787434 0.22441465832689  
 H -3.42907408248789 0.52378760423370 2.1025185524674  
 F -1.91156050061396 1.81259232007001 1.83543057666619  
 F -3.84276319014948 2.61451064589078 -1.91067278872776  
 F -5.95494864060291 2.45392588201627 2.28511398861090  
 F -4.60256339088727 0.97135793626240 -3.07371467333598

**7A\_a, Chloroform**

C -5.46260981471200 1.58729493809566 0.40590259244202  
 C -4.96985751136491 0.97928984915273 -0.90041109348150  
 C -4.33191216201635 2.22308278503197 1.18723582165441  
 C -3.17267415170271 1.24822125843554 1.38081251439097  
 H -4.70651636325263 2.57149376544828 2.14895887687987  
 H -3.99418929988029 3.10081984440624 0.63018694696552  
 C -2.77497470667162 0.65300403219308 0.03309369830041  
 N -3.92183744173733 0.00580661321001 -0.61139314685391  
 C -4.20209689266018 -1.29896047762230 -0.41632115522854  
 O -3.54080262960161 -0.25792103075234 0.24494667317234  
 C -5.41848372129286 -1.894412014063285 -1.19133188347366  
 F -5.42272861245446 -1.51292753919724 -2.47196633389023  
 F -6.58674640195611 -1.54158817129504 -0.65309579481688  
 F -5.34332429768590 -3.21410205491547 -1.16147362537253  
 H -6.26135426896446 2.30016553591871 0.20410655458444  
 F -6.00719949948773 0.55477922216551 1.16986459204470  
 H -2.51172493198878 1.47088869993010 -0.64287210585157  
 C -1.47082862483608 -0.14285663274149 0.13255108019705  
 H -3.45843072648965 0.44136374522259 2.05631977299264  
 H -2.31877047092630 1.76530464389298 1.81879063226370  
 H -5.79197897558087 0.51639091378151 -1.43278435816839  
 H -4.55901238264721 1.76488394149820 -1.53502638825933  
 F -1.33377435445744 -0.85294396645039 1.24885364047146  
 F -0.46153079482276 0.75029215580242 0.14183499087231  
 F -1.26993096288172 -0.94557193057842 -0.91050250183529

**7B\_a, Gas Phase**

C -5.30844272664122 1.45988350820399 -0.35915459731360  
 C -4.49778577470216 0.66624709928890 -1.36970052713444  
 C -4.51480017926743 1.73300781243147 0.91650203752189  
 C -3.94039010457307 0.44576924293747 1.47275111131856  
 C -3.07212377008059 -0.26231818948120 0.44914494239733  
 N -3.94334284999593 -0.57391898080233 -0.73050063347418  
 H -5.16104312940432 2.19227759682916 1.66275863592631  
 H -3.69441282151868 2.43029163235900 0.72943546046547  
 H -3.43120723069014 -1.12294470286982 -1.42505012463734  
 H -4.72543643131071 -1.15098482742711 -0.39666467427139  
 H -5.61166419758794 2.39464139134118 -0.82806002830454  
 H -6.21952902579780 0.91034087193289 -0.11605136688126  
 C -5.32411456178951 0.21138907441327 -2.57006476379017  
 H -3.64449716133111 1.23568021748972 -1.7424869310105  
 F -4.97841947000376 -0.43022715609952 1.75225998136021  
 H -3.37348868387898 0.61289918049348 2.38779397094280  
 H -2.25173687167667 0.36783202036953 0.11002568521162  
 H -2.68553058290142 -1.20195369654637 0.83466256030101  
 F -6.30436848547920 -0.59910582243240 -2.16782506357032  
 F -4.54856616621010 -0.47758672447932 -3.41140839931495  
 F -5.83961977515922 1.24657045204799 -3.19694721365196

**7A\_e, Gas Phase**

C -5.37384456323784 1.72147630971147 0.47773897051460  
 C -5.06848369469930 0.90597869836897 -0.78112308664320  
 C -4.13141168700660 2.30917866812984 1.14591079467008  
 C -3.07561984978118 1.24186974657340 1.34268291064631  
 H -4.40031733739991 2.74274403422069 2.10894982848764  
 H -3.6995243886817 3.10316988691542 0.53528153088493  
 C -2.75264785280296 0.54977006539662 0.02655405797671  
 N -3.96654072764758 -0.01547814703580 -0.54378819020378  
 C -4.23901171981720 -1.34197278021786 -0.656406981020031  
 O -5.27839723597490 -1.79145316807777 -1.05672469942568  
 C -3.14440849774968 -2.35037267617055 -0.20908129310654  
 F -2.01953561383694 -2.21217529569016 -0.91492867979428  
 F -3.58261240339442 -3.58044688652096 -0.37005215523128  
 F -2.84610429837426 -2.18291283178725 1.08671215242699  
 H -6.08736545476366 2.50901860758711 0.23669666337267  
 H -5.87466101967076 1.04505291432240 1.17346767167550  
 H -5.93593916629687 0.29935246486334 -1.03624988173798  
 C -4.84408530723467 1.77047871192501 -2.01878530593905  
 H -2.33115888543954 1.27931928214195 -0.66534541128190  
 H -2.00925289728217 -0.22143595674325 0.18371777934920  
 H -3.40300158764552 0.49659897778007 2.07419264257699  
 F -1.91345370033082 1.81500635511278 1.81601445268357  
 F -3.83951480565323 2.64915136918406 -1.88361916730980  
 F -5.94858850308662 2.47831515528490 -2.27556628742756  
 F -4.57728075200517 1.02470649472557 -3.08757548696383

**7B\_a, Water**

C -5.33266414799742 1.41732094824966 -0.35224645666071  
 C -4.50090125858613 0.64201839595290 -1.35931148230124  
 C -4.52515317112785 1.72996856454205 0.90288390676705  
 C -3.91851045389156 0.47254315413276 1.48360500328987  
 C -3.09926961043931 -0.27800698152000 0.46043558174142  
 N -3.95084621124944 -0.59054562968032 -0.72891760734420  
 H -5.16074735837737 2.20446099293796 1.64871142143558  
 H -3.71272332394276 2.42256988083807 0.67386725101449  
 H -3.39346574790621 -1.11933600827359 -1.40321301505688  
 H -4.71366582980485 -1.20733429944313 -0.43211261941265  
 H -5.66631767081165 2.34070597472645 -0.82093776814058  
 H -6.21880404248037 0.83641438607897 -0.09131847564258  
 C -5.30759331529264 0.23970905017464 -2.58366530978436  
 H -3.64810089596919 1.22538971263561 -1.70799644820354  
 F -4.94603228849817 -0.37934595773165 1.89622571630326  
 H -3.29609944213425 0.68902804670289 2.34988890378230  
 H -2.46485465408427 0.32976735367652 0.11830924335799  
 H -2.73454266390934 -1.22229724513794 0.85157368814973  
 F -6.33829056751345 -0.54332251953461 -2.25255617845018  
 F -4.55636105052918 -0.43822476128701 -3.45452132288240  
 F -5.78557629545454 1.31630602259177 -3.19728403196236

**7A\_e, Chloroform**

C -5.36834771648390 1.74428964041601 0.48673638829950  
 C -5.07826318674059 0.90528729019829 -0.7592476622403  
 C -4.12117265907894 2.33254494404640 1.14337953650115

**7B\_e, Gas Phase**

C -5.54480557166163 1.36085944235390 -0.31819601961937  
 C -4.68119770085968 0.62336646136388 -1.33791770410275  
 C -4.75181122771340 1.75855457281722 0.91080017226005

|   |                   |                   |                   |
|---|-------------------|-------------------|-------------------|
| C | -4.03888102150632 | 0.54953228269323  | 1.51946241566490  |
| C | -3.21144052070700 | -0.25211647066174 | 0.52544723637809  |
| N | -4.03487190170720 | -0.57120313346841 | -0.69283725793469 |
| H | -5.42748694519609 | 2.18449497769982  | 1.65119290983898  |
| H | -4.04456774942993 | 2.53817140427976  | 0.63184020813114  |
| H | -3.44863029162991 | -1.05688153799657 | -1.37756328172118 |
| H | -4.76385773753492 | -1.23175361449431 | -0.41049213383690 |
| F | -6.02223181403622 | 2.46755024497791  | -0.95950255162531 |
| H | -6.40237488426415 | 0.73816373480053  | -0.03746952709406 |
| C | -1.89458582884236 | 0.40470052009767  | 0.09267411988795  |
| H | -2.91931815867706 | -1.21051097883152 | 0.95579793045639  |
| H | -5.27468152597966 | 0.26580297917152  | -2.17553691560095 |
| H | -4.76968727435954 | -0.12881031916256 | 1.96771934458026  |
| H | -3.38157887249387 | 0.86104911344648  | 2.33143967615499  |
| H | -3.88958528130768 | 1.27375017321725  | -1.70270107117215 |
| F | -2.04019003083547 | 1.66816203501691  | -0.29300473682633 |
| F | -1.38542378869309 | -0.27930223369020 | -0.93936181055622 |
| F | -1.04737187256478 | 0.36536034636923  | 1.10155899673714  |

### 7B\_e, Water

|   |                   |                   |                   |
|---|-------------------|-------------------|-------------------|
| C | -5.54383905514661 | 1.35253609783839  | -0.30810752901213 |
| C | -4.69108620089197 | 0.62255125388871  | -1.33392283229361 |
| C | -4.74169760449100 | 1.76296012736724  | 0.90565198589742  |
| C | -4.03323124463457 | 0.54886501691518  | 1.50616723280602  |
| C | -3.21294726840367 | -0.25089891069135 | 0.50518103672979  |
| N | -4.03896714398391 | -0.55928061998474 | -0.69815580666700 |
| H | -5.40805768128537 | 2.18984020327638  | 1.65375594585331  |
| H | -4.02957219878666 | 2.53385174694612  | 0.61337575183187  |
| H | -3.48367519099960 | -1.06361712825665 | -1.39397436332953 |
| H | -4.76068857755321 | -1.22417166042637 | -0.40647433325624 |
| F | -6.04764236623493 | 2.47486175733588  | -0.94524327290461 |
| H | -6.39460397902338 | 0.73162077506898  | -0.01924857685238 |
| C | -1.89394461545560 | 0.40052477754656  | 0.10252543436822  |
| H | -2.9333389587003  | -1.21275275121568 | 0.93254186826988  |
| H | -5.29352611509254 | 0.25100067084052  | -2.15686130507357 |
| H | -4.77179547341227 | -0.13403720006996 | 1.92957717905784  |
| H | -3.38263378715826 | 0.85048064502169  | 2.32546701968380  |
| H | -3.91079053958068 | 1.27558981585838  | -1.71640269668926 |
| F | -2.01575961059582 | 1.66615567260966  | -0.30535747251476 |
| F | -1.31795504728531 | -0.28092900433943 | -0.89200205343914 |
| F | -1.06882734411458 | 0.39378871447049  | 1.14485588753405  |

### 7C\_ae, Gas Phase

|   |                   |                   |                    |
|---|-------------------|-------------------|--------------------|
| C | -5.33052998437363 | 1.40133893483788  | -0.35456587544443  |
| C | -4.47137911907797 | 0.64246108426863  | -1.361176756599519 |
| C | -4.52558688814046 | 1.72397757851092  | 0.89870967750949   |
| C | -3.92266932090495 | 0.45964752468922  | 1.48059348508334   |
| C | -3.12238183364738 | -0.28395868296360 | 0.42722126944179   |
| N | -3.92425473155761 | -0.54829903107325 | -0.75194624692365  |
| H | -5.15314041921242 | 2.20782671145377  | 1.64712358608013   |
| H | -3.70917054572140 | 2.41267923200677  | 0.66236657808015   |
| H | -3.40437865115948 | -1.09573109592305 | -1.42376213678385  |
| H | -5.71237143697003 | 2.31455119088234  | -0.80984428713315  |
| H | -6.17928182823067 | 0.77365195095852  | -0.08208984748556  |
| C | -5.29975431060246 | 0.23699861729494  | -2.56772106042514  |
| H | -3.69388623486024 | 1.32046435122610  | -1.75371273336447  |
| F | -4.93986032934525 | -0.34985392925358 | 1.95762656259510   |
| H | -3.27479521243052 | 0.69272995876119  | 2.32852543656263   |
| H | -2.23379520136778 | 0.33263494326568  | 0.21273879769319   |
| H | -2.78033275295376 | -1.23284263096365 | 0.83832369618919   |
| F | -6.37845729965239 | -0.47291865435923 | -2.24507911180498  |
| F | -4.57412350924069 | -0.50559001977385 | -3.41907637792854  |
| F | -5.71600039055090 | 1.31727196615424  | -3.24048384594609  |

### 7C\_ae, Water

|   |                   |                   |                   |
|---|-------------------|-------------------|-------------------|
| C | -5.32534737014020 | 1.40895780846473  | -0.35952954886482 |
| C | -4.46994304306605 | 0.63664393808563  | -1.36013640553392 |
| C | -4.52693644683233 | 1.72178889127876  | 0.90052734919926  |
| C | -3.92033020316152 | 0.46172766497701  | 1.47837551786662  |
| C | -3.12486362274423 | -0.28471835628859 | 0.43027771658889  |
| N | -3.93374326272250 | -0.56607215883311 | -0.74996589766674 |
| H | -5.15719573560407 | 2.20639871775081  | 1.64615214197168  |
| H | -3.70712465784342 | 2.40705528308379  | 0.67039721452699  |

|   |                   |                   |                   |
|---|-------------------|-------------------|-------------------|
| H | -3.36472201303899 | -1.06879752234533 | -1.42021315315547 |
| H | -5.68182951918423 | 2.33160608706188  | -0.81570470249262 |
| H | -6.19367206421897 | 0.80346134264361  | -0.09594286706295 |
| C | -5.30049663467401 | 0.23565329467795  | -2.56172033848023 |
| H | -3.68264523991734 | 1.29949975060690  | -1.75022078598075 |
| F | -4.95037171043611 | -0.36245447359953 | 1.95290813903100  |
| H | -3.28312528842958 | 0.68701369312024  | 2.33350648211207  |
| H | -2.24818989483222 | 0.33714829692285  | 0.20001826698440  |
| H | -2.76774702577604 | -1.22782909794859 | 0.84131234414579  |
| F | -6.37549658004323 | -0.49284544634136 | -2.23664355589699 |
| F | -4.58807198431271 | -0.49761486551776 | -3.43234124201453 |
| F | -5.74429770302223 | 1.31041715220009  | -3.22787667527768 |

### 7C\_aa, Gas Phase

|   |                   |                   |                   |
|---|-------------------|-------------------|-------------------|
| C | -5.34099849688281 | 1.43183179001673  | -0.35454325571070 |
| C | -4.50160004774296 | 0.60701310581378  | -1.33151929317488 |
| C | -4.51953428084256 | 1.74228416796135  | 0.89618974149734  |
| C | -3.91599982120435 | 0.48199794524208  | 1.48750800150226  |
| C | -3.15532784536025 | -0.30583687308870 | 0.43325718025709  |
| N | -3.96055345170475 | -0.60132447389771 | -0.73831015953254 |
| H | -5.13332654918883 | 2.23966263642263  | 1.64707952052526  |
| H | -3.69911202583591 | 2.42196537701158  | 0.64664040936951  |
| H | -4.71957814959683 | -1.22054017181494 | -0.47446075111332 |
| H | -5.68100601646467 | 2.35583941717800  | -0.82092271416912 |
| H | -6.22494305585861 | 0.85402049212810  | -0.07587227068537 |
| C | -5.28546157194060 | 0.23078391581716  | -2.57518381901905 |
| H | -3.65905605288634 | 1.21141412518813  | -1.68633000385896 |
| F | -4.94646966116828 | -0.32562525597544 | 1.96341371413955  |
| H | -3.27259279317574 | 0.71470938260274  | 2.33859283697607  |
| H | -2.28184704690297 | 0.27705463300098  | 0.12480534923573  |
| H | -2.79151951043913 | -1.23984894576992 | 0.85972466707236  |
| F | -6.25956089497585 | -0.64607599509476 | -2.29027598304351 |
| F | -4.51367423576778 | -0.32028260894739 | -3.51012927431959 |
| F | -5.86697849206077 | 1.30637734250562  | -3.12199389594813 |

### 7C\_aa, Water

|   |                   |                   |                   |
|---|-------------------|-------------------|-------------------|
| C | -5.35424121509003 | 1.42064474617776  | -0.35003814260188 |
| C | -4.50897264303354 | 0.60445705182968  | -1.32672008243657 |
| C | -4.52646848942400 | 1.73644465975033  | 0.89560641744175  |
| C | -3.89758244773095 | 0.49020994455069  | 1.48332516736245  |
| C | -3.15606562914673 | -0.31064054800056 | 0.42898306249954  |
| N | -3.98069917552207 | -0.61460107958158 | -0.73488767970634 |
| H | -5.13857365807742 | 2.22852591110406  | 1.65132127355581  |
| H | -3.71543318058160 | 2.42284238961472  | 0.63771288958980  |
| H | -4.75343064027313 | -1.20345968677402 | -0.43779945978750 |
| H | -5.69469227511089 | 2.34671694162908  | -0.81156186869457 |
| H | -6.23615934102000 | 0.83851980655636  | -0.07221655623837 |
| H | -5.27441724845506 | 0.24151217061823  | -2.58069974492762 |
| C | -3.66191462362230 | 1.21015484619352  | -1.66518325337696 |
| F | -4.91954185301293 | -0.32577517177234 | 1.99969495011574  |
| H | -3.23963814004729 | 0.73408100558647  | 2.31767861710079  |
| H | -2.28786968553794 | 0.27036985028618  | 0.10692957486887  |
| H | -2.79119284578634 | -1.24174699062585 | 0.86047298032888  |
| F | -6.26722321267162 | -0.62711078674965 | -2.32854441195671 |
| F | -4.49206912493413 | -0.32451593831820 | -3.50743774331298 |
| F | -5.83295457092201 | 1.31879087792515  | -3.14896598982414 |

### 7C\_ee, Gas Phase

|   |                   |                   |                   |
|---|-------------------|-------------------|-------------------|
| C | -5.55569020384134 | 1.33350911699343  | -0.30943489692465 |
| C | -4.67651565791121 | 0.63628797603343  | -1.33243546590042 |
| C | -4.74173404218902 | 1.75876099703175  | 0.89369259996835  |
| C | -4.01019492337766 | 0.55539809254060  | 1.48933615983034  |
| C | -3.21968128851011 | -0.24719890204772 | -0.45468705944098 |
| N | -4.03530532420250 | -0.51049862763824 | -0.70624855290082 |
| H | -5.39466057763570 | 2.20518146710937  | 1.64429874327245  |
| H | -4.03625361475177 | 2.52604644698443  | 0.57251385683410  |
| H | -3.5593788551124  | -1.09461618889763 | -1.37756121827078 |
| F | -6.12486297675480 | 2.44751432701711  | -0.90266478625904 |
| H | -6.37015475881061 | 0.66911164249341  | -0.00835967838465 |
| C | -1.86590794840434 | 0.38271794154761  | 0.13446342945386  |
| H | -2.95263435387468 | -1.20892459929673 | 0.90055689035494  |
| H | -5.29663070484465 | 0.27385811635476  | -2.15141611131436 |
| H | -4.74355359590517 | -0.12822484068345 | 1.92079937725767  |



H -3.35175471708324 0.87095692358858 2.29817623557329  
H -3.97718361170845 1.37699803046519 -1.73777166447774  
F -1.94864981051810 1.63563547910136 -0.33199322596894  
F -1.22198570211568 -0.33729229482638 -0.79556567506021  
F -1.08360733204974 0.41639889612912 1.22046692347562

### 7C\_ee, Water

C -5.55318600463420 1.32793753446789 -0.30626596111964  
C -4.67661282380503 0.63448776525623 -1.33165411572210  
C -4.74319249369381 1.75934326888264 0.89427238124415  
C -4.01010900097464 0.55630397871106 1.48956107337889  
C -3.22157378923012 -0.24919467467887 0.45581762496456  
N -4.03865210703835 -0.51510487526103 -0.70565976502101  
H -5.39676112776786 2.19960148480602 1.64777450245366  
H -4.03769463689178 2.52752702875059 0.57373717111982  
H -3.56127539182225 -1.09466720683289 -1.38168163209198  
F -6.12448451576944 2.45290055368430 -0.90783133120117  
H -6.37567863572779 0.67455129127863 -0.00804413023799  
C -1.87055704375439 0.38034023995956 0.13266620432577  
H -2.95159713220368 -1.20876081333782 1.64777450245366  
H -5.29258273717755 0.27368002895049 -2.15423208972847  
H -4.74275236617793 -0.12622582588871 1.92317263323343  
H -3.35428527768863 0.87520130799461 2.29886332184430  
H -3.97170291441292 1.37260936749339 -1.73260108108794  
F -1.94479809690809 1.63760696365162 -0.33182505305675  
F -1.21884232342099 -0.33225153995034 -0.79976325358076  
F -1.08000158090058 0.41573412206263 1.21630385883045

### 7C\_ea, Gas Phase

C -5.57425451588622 1.35749836182805 -0.27256169085031  
C -4.72826283110564 0.62732300422549 -1.30462448705514  
C -4.72787169964769 1.77965890227196 0.90970423400379  
C -4.01924974400922 0.56491142604081 1.50833385816885  
C -3.24870188716992 -0.25051555584975 0.46151997452971  
N -3.99729183733190 -0.50472722704157 -0.75270222936628  
H -5.35526391437303 2.25641398801209 1.66320105028828  
H -4.00476760133084 2.52074352151437 0.56547576732735  
H -4.59826560043282 -1.30688382920899 -0.63218868685206  
F -6.13703004781361 2.47438847826835 -0.86731172959236  
H -6.39951618583814 0.71798536506265 0.05931556190751  
C -1.8869758889920 0.35569830989876 0.13196238162369  
H -2.99047126689298 -1.21920618093309 0.89351917016867  
H -5.35451543552137 0.26796136882893 -2.11987650110792  
H -4.76784760885012 -0.10610233745046 1.93789378280324  
H -3.36103279408127 0.86487099504478 2.32318839664704  
H -4.02400002516302 1.34387425359966 -1.73045918732078  
F -1.97144080947427 1.55645837050392 -0.45949029650496  
F -1.17864223355738 -0.43243684811168 -0.67354644845448  
F -1.16972837262136 0.52388510151224 1.25347707963617

### 7C\_ea, Water

C -5.57299639000181 1.34592049189871 -0.26989897176113  
C -4.72411127954824 0.63026220690891 -1.30656599053154  
C -4.73281715441421 1.78104913087509 0.90827035812106  
C -4.01959068868074 0.56809941042303 1.50453473326233  
C -3.24608861151541 -0.24703139493175 0.46177284742495  
N -3.99025567134297 -0.50521713688293 -0.75889480902543  
H -5.36394067727815 2.24694891014330 1.66535382789485  
H -4.01398508706674 2.52768551696032 0.56494278797174  
H -4.61754571313974 -1.28301581441998 -0.60089454587846  
F -6.14690171410478 2.47018880484470 -0.87353449635900  
H -6.39744874330772 0.70705771433922 0.05634890548367  
C -1.88606271239790 0.35119083611354 0.13444983948858  
H -2.99608533514692 -1.21559149352453 0.89777745072406  
H -5.35077183847209 0.26841688979508 -2.12033096371899  
H -4.76629217589031 -0.10738138622887 1.92757660405717  
H -3.36674977881437 0.86958268707518 2.32302170877138  
H -4.02242765009052 1.35387497717304 -1.72646263400503  
F -1.95115776167742 1.55729063784996 -0.45422139211659  
F -1.17913340100558 -0.43558558453599 -0.68539223326599  
F -1.15139761610438 0.50805459612399 1.24697910610927

### 8A\_a, Gas Phase

C -5.49967351429139 1.36069973752981 -0.01931461824505  
C -4.94320879322033 0.60894919517504 -1.21591646230291  
C -4.41321767731005 1.73034003572787 0.98254712644670  
C -3.54917618030946 0.51388029936608 1.35272782208288  
C -3.00544793110638 -0.12377473011380 0.07424512978805  
N -4.09378246581906 -0.49698775680204 -0.80961015416283  
C -4.31734204935890 -1.71156618866080 -1.35119250594221  
O -5.19198752048963 -1.96370621524115 -2.13891474451623  
C -3.37116229237096 -2.87155072174251 -0.93602326248657  
F -3.38536714852031 -3.07879574022579 0.38623543361732  
F -2.10565815516626 -2.62013726969722 -1.29750785640175  
C -3.74638220745675 -3.98761106561664 -1.52585236325630  
C -4.98318425089016 2.45845880819232 2.19087616203576  
H -3.75722609148998 2.42644885244766 0.44499531887608  
C -4.25768002388594 -0.52353391545056 2.21788427924644  
H -2.68541838366156 0.89219441412917 1.90708720053356  
H -5.75240904323864 0.22268925085163 -1.28283144134562  
H -4.35545384487091 1.31253006130769 -1.81665384768012  
H -5.99984149194070 2.26594275151119 -0.37518815432037  
F -6.47294489116655 0.58336425636753 0.59095672122656  
H -2.36684995835356 0.59124729321099 -0.4567483898482  
H -2.39910878371190 -0.98924573124573 0.31548943560281  
H -5.77263241349212 1.87766213074531 2.66480024045823  
H -5.40417208615847 3.42153111648683 1.89989222635862  
H -4.20213184751705 2.64131229882828 2.93031698644410  
H -5.08332688588282 -0.99036531100537 1.68293354356502  
H -4.66115319851937 -0.07434479109795 3.12402698399877  
H -3.55912086980077 -1.30690106497784 2.51179918636387

### 8A\_a, Chloroform

C -5.49314785483089 1.36768705963081 -0.02871798492558  
C -4.93254606953114 0.61951084422512 -1.22316250627268  
C -4.41607025011233 1.72758362136199 0.98315200623636  
C -3.55183220950768 0.51096857146127 1.35079389900987  
C -3.00059946010685 -0.12086130901977 0.07289025049352  
N -4.09072775665464 -0.49672722505469 -0.81504452055165  
C -4.33214646607498 -1.71023216418173 -1.32027711949062  
O -5.23809358802073 -1.98604706545013 -2.07715314929012  
C -3.36897720560853 -2.86570137027699 -0.93002685777302  
F -3.35548957107262 -3.08824987602907 0.38762346798151  
F -2.11473089879706 -2.61290940642797 -1.31984420180405  
C -3.75454243538733 -3.98356315989652 -1.52178510212944  
F -4.98883450095916 2.45360873467665 2.19166866679284  
H -3.75907681217873 2.42599138639251 0.45154459439849  
C -4.25794748004688 -0.53056590753945 2.21303157259448  
H -2.68942158405052 0.88887812214202 1.90619339256076  
H -5.73905863130708 0.25055714730867 -1.84811798547580  
H -4.32783283215645 1.31945193734192 -1.80753562585498  
H -5.99164274510685 2.27199785658019 -0.38414491166460  
F -6.47925482808490 0.58087850259069 0.57022794472055  
H -2.37103832103409 0.59787143242089 -0.45969085997438  
H -2.38997360331988 -0.98290291673188 0.31487093789278  
H -5.77042830673433 1.86925382244614 2.67510366758094  
H -5.41745918873935 3.41204855383135 1.89619620656232  
H -4.20401638198291 2.64463247717627 2.92520706879765  
H -5.07465861698338 -1.00868361305886 1.67286971068692  
H -4.67297602523806 -0.08077416524684 3.11397551967763  
H -3.55253637637262 -1.30467189067258 2.51573191922028

### 8A\_e, Gas Phase

C -5.44821095893474 1.15565304393099 -0.10480329720037  
C -4.69407038701665 0.65132772730399 -1.33247359007651  
C -4.46729504889139 1.57358880250257 1.00712852467415  
C -3.52749418119369 0.40314529144795 1.29114047803682  
C -2.83786005510041 -0.12257113112986 0.03596487337111  
N -3.83396005853413 -0.45708838892490 -0.96862071080747  
C -4.00273933953256 -1.74629470028314 -1.32551562669985  
O -3.34952046680877 -2.66900835765729 -0.91187729772883  
C -5.12040708060026 -2.06003831906833 -2.35976608785376  
F -4.93717036475828 -1.39586156243848 -3.50694823926528  
F -6.33059633415515 -1.73002317707474 -1.88446664533206  
F -5.13116984782528 -3.34786305857802 -2.63273024153690  
H -5.39358598618702 0.35848004547591 -2.10658670027492

|   |                   |                   |                   |
|---|-------------------|-------------------|-------------------|
| H | -4.07007069735650 | 1.44643750591499  | -1.75050594620453 |
| H | -2.16891963878115 | 0.64572059685905  | -0.35983581817755 |
| H | -2.25486505330494 | -1.00806909545861 | 0.26943640751332  |
| C | -6.41625574424719 | 2.25860599706155  | -0.50278950100901 |
| H | -6.02861757275677 | 0.30594638569301  | 0.27099368439553  |
| H | -4.08706504676945 | -0.41371052651922 | 1.75497790321400  |
| F | -2.54617079361917 | 0.78607181902487  | 2.18797896172449  |
| H | -5.05109360612610 | 1.74562011977254  | 1.91618574514966  |
| C | -3.70486705687101 | 2.85822823837478  | 0.69750679820112  |
| H | -5.90387671737552 | 3.06526364499126  | -1.02886675423812 |
| H | -6.90943640898921 | 2.68450954899910  | 0.37122160917373  |
| H | -7.18555870528998 | 1.86453283985678  | -1.16760247798406 |
| H | -3.13597556621300 | 2.79643609269878  | -0.23085047262140 |
| H | -3.00533338784561 | 3.08282422948065  | 1.50006033746592  |
| H | -4.39333389491603 | 3.69739638774384  | 0.60936408409075  |

### 8A\_e, Chloroform

|   |                   |                   |                   |
|---|-------------------|-------------------|-------------------|
| C | -5.45352582789407 | 1.16083784421480  | -0.08937024511502 |
| C | -4.71241891740938 | 0.64118425339404  | -1.31819012580053 |
| C | -4.46465503190964 | 1.58510286374071  | 1.01314292551981  |
| C | -3.53945001317503 | 0.40708671678655  | 1.29928857505356  |
| C | -2.85234946764918 | -0.12966112368292 | 0.04807247776213  |
| N | -3.85731289301802 | -0.47412266258279 | -0.94721001020177 |
| C | -3.99681841322573 | -1.74525411614662 | -1.33772246397979 |
| O | -3.32187471342755 | -2.67520494750467 | -0.95321267405531 |
| C | -5.10695482252527 | -2.06099619868245 | -2.37957117846904 |
| F | -4.92795455271741 | -1.38618279039106 | -3.51936169569591 |
| F | -6.32484977832350 | -1.76525414759145 | -1.91059850558994 |
| F | -5.09143403975263 | -3.3505373053410  | -2.66944287526843 |
| H | -5.42110151550355 | 0.34769274760351  | -2.08343202341583 |
| H | -4.08071066057440 | 1.42344975954776  | -1.74648901558770 |
| H | -2.19088154426866 | 0.63508131552873  | -0.36532711022468 |
| H | -2.26507507903327 | -1.00931522747209 | 0.29015485154078  |
| C | -6.41399342267847 | 2.26819921115750  | -0.49417958478815 |
| H | -6.03824963539874 | 0.32134757008805  | 0.30146406313497  |
| H | -4.10319821017749 | -0.39947188534828 | 1.77297288179647  |
| F | -2.54361333315061 | 0.78345524763575  | 2.19483396543008  |
| H | -5.04546389287126 | 1.76813568703180  | 1.92146657673349  |
| C | -3.69519387649849 | 2.86098665785932  | 0.68496864933888  |
| H | -5.89602369824060 | 3.06307295743875  | -1.03257483283462 |
| H | -6.89493440508510 | 2.70681714310174  | 0.38044844874184  |
| H | -7.19072483115317 | 1.87237202370884  | -1.14933483848530 |
| H | -3.12663908083592 | 2.78208231007414  | -0.24232062777796 |
| H | -2.99737791539356 | 3.09885655101390  | 1.48588136555122  |
| H | -4.38274042811194 | 3.69949597001055  | 0.58336302668671  |

### 8B\_a, Gas Phase

|   |                   |                   |                   |
|---|-------------------|-------------------|-------------------|
| C | -5.43279897469535 | 1.21801311953231  | -0.50759097030802 |
| C | -4.57835388731408 | 0.48794382381110  | -1.52452247606867 |
| C | -4.66584111025161 | 1.54386197555168  | 0.76716154777633  |
| C | -3.99087517925445 | 0.29383201313193  | 1.36800069500382  |
| C | -3.18808461982574 | -0.44153612818461 | 0.30250623319743  |
| N | -4.06804264852629 | -0.75842439855789 | -0.87510973535957 |
| H | -3.56486897739639 | -1.33198117711518 | -1.55117329412411 |
| H | -4.87646626648037 | -1.30156110844000 | -0.55495456909045 |
| C | -5.54417018275148 | 2.28531426631244  | 1.76634014348112  |
| H | -3.86373604371300 | 2.22287579574803  | 0.45439961789843  |
| H | -3.25482251294170 | 0.65174647955175  | 2.09199753552298  |
| C | -4.93503208206685 | -0.65118012110555 | 2.10953981278494  |
| H | -5.15921315366846 | 0.20842845674645  | -2.39955035764382 |
| H | -3.71819373423697 | 1.08471905910313  | -1.82289380789254 |
| F | -6.49797173823648 | 0.37047438183262  | -0.23287281520452 |
| H | -5.83676947681687 | 2.12645187860050  | -0.95654824189487 |
| H | -2.37155748915717 | 0.16639070608397  | -0.08613082877779 |
| H | -2.78837547648003 | -1.38191903278500 | 0.67582651716336  |
| H | -5.71326881811671 | -1.07141285984481 | 1.47161879528099  |
| H | -5.44629340117137 | -0.12509922747698 | 2.91299686919727  |
| H | -4.37401333971870 | -1.46852113735589 | 2.56180425328047  |
| H | -6.45732560047732 | 1.73342206307762  | 1.98275271757911  |
| H | -5.82665201641359 | 3.26312590781489  | 1.37741515493220  |
| H | -5.01054327028903 | 2.44279526396749  | 2.70386720326593  |

### 8B\_a, Water

|   |                   |                   |                   |
|---|-------------------|-------------------|-------------------|
| C | -5.43787098406545 | 1.22306777518140  | -0.49784480047857 |
| C | -4.60882191958474 | 0.45846038637662  | -1.50294176648594 |
| C | -4.66752009875955 | 1.54074821128062  | 0.77380674651851  |
| C | -4.00150712537999 | 0.28940974753005  | 1.37404629478765  |
| C | -3.18787014206254 | -0.43004375977679 | -0.30829684325070 |
| N | -4.04428674683731 | -0.76125803671520 | -0.86879884234960 |
| H | -3.49837591089951 | -1.27944986561934 | -1.55651083497953 |
| H | -4.80461933252637 | -1.38377519428016 | -0.58719529550137 |
| C | -5.2585175360497  | 2.30450402995860  | 1.77221333346954  |
| H | -3.85721802286506 | 2.20247735806870  | 0.44960922392408  |
| H | -3.27553538724302 | 0.64273850583350  | 2.10983876458962  |
| C | -4.95549055688152 | -0.66389047204950 | 2.09009935455732  |
| H | -5.20574306717116 | 0.15285054054901  | -2.35676957221631 |
| H | -3.77252281291624 | 1.06805131126767  | -1.83921290346131 |
| F | -6.56089862826763 | 0.44185485345867  | -0.20241424520388 |
| H | -5.79889533268959 | 2.13968554280546  | -0.96445037027200 |
| H | -2.38330099387222 | 0.19769302133991  | -0.07070451385311 |
| H | -2.77194387272316 | -1.36329601045637 | 0.67841858318070  |
| H | -5.69690515554992 | -1.09853521490544 | 1.41953594844857  |
| H | -5.49815366457785 | -0.14501311559360 | 2.87869567965403  |
| H | -4.39092672887366 | -1.47543128614688 | 2.54894895169704  |
| H | -6.43410898257382 | 1.75693011792310  | 2.02054706135551  |
| H | -5.81444432762154 | 3.27294595622429  | 1.36259525509950  |
| H | -4.97045845245319 | 2.47703559774569  | 2.69507110426887  |

### 8B\_e, Gas Phase

|   |                   |                   |                   |
|---|-------------------|-------------------|-------------------|
| C | -5.46601738688283 | 1.06390900419875  | -0.47766967949466 |
| C | -4.61400847897395 | 0.32738238253169  | -1.49916982750301 |
| C | -4.65792258184669 | 1.43449223475066  | 0.78179033703003  |
| C | -4.01539396218857 | 0.16943027703020  | 1.34181661100191  |
| C | -3.16714921531903 | -0.56747758949866 | 0.30990923495969  |
| N | -4.01435775550347 | -0.90358315541404 | -0.87630268923907 |
| H | -3.45968130650685 | -1.41332693269314 | -1.56490760485117 |
| H | -4.77076367322797 | -1.52989892019014 | -0.58913429262977 |
| H | -5.20069562928125 | 0.00929927258879  | -2.35870577337446 |
| H | -3.77936881876770 | 0.93523090052007  | -1.84729641533273 |
| H | -2.35257632822291 | 0.06431914004652  | -0.04032678826066 |
| H | -2.76220019477923 | -1.48772474243206 | 0.72303597225928  |
| F | -3.18154741459283 | 0.45303612288153  | 2.38840692820730  |
| H | -4.79640707969804 | -0.50338700862396 | 1.71469213650093  |
| H | -5.37609469564701 | 1.77804167100575  | 1.53026020498015  |
| C | -3.64555420045699 | 2.55347556182477  | 0.56211433285135  |
| H | -6.27240226839864 | 0.38491809293088  | -0.17353201651467 |
| C | -6.10646059618299 | 2.27944687048600  | -1.13869604089665 |
| H | -2.95641195307131 | 2.35967128501409  | -0.26201335968804 |
| H | -3.05434157915220 | 2.70626204964868  | 1.46243137091594  |
| H | -4.15813218083961 | 3.48879535093792  | 0.34630558401993  |
| H | -5.35439456914948 | 2.94270877484254  | -1.56634562281040 |
| H | -6.67538190342474 | 2.85035060947065  | -0.40558466366653 |
| H | -6.78840622788573 | 1.98399874814253  | -1.93506793849467 |

### 8B\_e, Water

|   |                   |                   |                   |
|---|-------------------|-------------------|-------------------|
| C | -5.46366762446135 | 1.06687828270370  | -0.47223585513163 |
| C | -4.61219366301806 | 0.32719360643938  | -1.49120730851043 |
| C | -4.65695110562215 | 1.44097639634718  | 0.78637211411747  |
| C | -4.02779516501245 | 0.16732386440057  | 1.33216764363851  |
| C | -3.17403088880544 | -0.56006725029777 | 0.30651233194375  |
| N | -4.00959954119119 | -0.89019513155846 | -0.87513736207114 |
| H | -3.44231533082001 | -1.38260206497706 | -1.56517120430508 |
| H | -4.75108818949129 | -1.54078051737659 | -0.60740717702364 |
| H | -5.20660907599244 | -0.00015869834624 | -2.34009088009707 |
| H | -3.78473398073062 | 0.93537447651517  | -1.85373847258241 |
| H | -2.35520244486054 | 0.06767747494748  | -0.03908689813751 |
| H | -2.77946683509304 | -1.48535219537586 | 0.71498526685350  |
| F | -3.20269297397856 | 0.44679289638084  | 2.41202486247229  |
| H | -4.81113251375632 | -0.50306180060191 | 1.69374415808704  |
| H | -5.37410425720768 | 1.78864193092086  | 1.53408432802950  |
| C | -3.63649338938014 | 2.55078867164915  | 0.55702035437836  |
| H | -6.26184245568374 | 0.38502908862608  | -0.16076455093538 |
| C | -6.10929614380830 | 2.27837783995207  | -1.13178038645095 |
| H | -2.95199772411632 | 2.33340866299154  | -0.26397372304306 |
| H | -3.04433753130009 | 2.71156687843455  | 1.45638712491296  |
| H | -4.14619543087093 | 3.48468427006839  | 0.32542168831048  |

|   |                   |                  |                   |
|---|-------------------|------------------|-------------------|
| H | -5.35804895333183 | 2.93838481966254 | -1.56710542781742 |
| H | -6.67857697811176 | 2.85006516426956 | -0.39835910117085 |
| H | -6.78729780335576 | 1.96842333422487 | -1.92665152546725 |

|   |                   |                   |                  |
|---|-------------------|-------------------|------------------|
| H | -5.51029879545086 | -0.15146519875459 | 2.88903514493758 |
| H | -4.40114368260507 | -1.47598291267392 | 2.54655447945228 |
| H | -6.43414217638149 | 1.77433600127835  | 2.00957225401589 |
| H | -5.80383248004252 | 3.28903897812554  | 1.36672489059455 |
| H | -4.97350289518807 | 2.48595406198567  | 2.70360974524405 |

**8C\_ae, Gas Phase**

|   |                   |                   |                   |
|---|-------------------|-------------------|-------------------|
| C | -5.44376992748150 | 1.21291757300228  | -0.49027089039399 |
| C | -4.60175791060318 | 0.41956223168122  | -1.47371424525571 |
| C | -4.66357447818475 | 1.53860183284239  | 0.77802338291407  |
| C | -3.99157567847418 | 0.28986642870016  | 1.37639270256515  |
| C | -3.18107231332979 | -0.40740190777368 | 0.28095447753127  |
| N | -4.04404048454188 | -0.75084839364078 | -0.83350040783291 |
| H | -3.57071415616713 | -1.34078099228784 | -1.50158944576626 |
| C | -5.51150863309023 | 2.31617970151892  | 1.77446829248553  |
| H | -3.84949200819496 | -0.11560842713683 | 0.44310547710147  |
| H | -3.28237174350934 | 0.64577447325424  | 2.13074517704628  |
| C | -4.95746648568252 | -0.67672533894890 | 2.05526543643066  |
| H | -5.22487927993380 | 0.11560842713683  | -2.31449661712991 |
| H | -3.82725933847494 | 1.10822929435738  | -1.85425792355871 |
| F | -6.59462469156646 | 0.49996542527301  | -0.17950833355705 |
| H | -5.77535985491258 | 2.14131097339519  | -0.96468407495486 |
| H | -2.35631121909033 | 0.25835502166141  | -0.02572192444297 |
| H | -2.73886526842667 | -1.32305302440351 | 0.67620629361935  |
| H | -5.63978883672602 | -1.11801549124691 | 1.33201768580001  |
| H | -5.54736568598026 | -0.17623676652453 | 2.82300310091900  |
| H | -4.40105830636019 | -1.48163224232860 | 2.53799804993281  |
| H | -6.42814882375574 | 1.77960248275565  | 2.01431699120127  |
| H | -5.79030705038031 | 3.28946338169418  | 1.36770815424300  |
| H | -4.96063782513325 | 2.48279439174004  | 2.70163864110249  |

**8C\_aa, Water**

|   |                   |                   |                   |
|---|-------------------|-------------------|-------------------|
| C | -5.43878161554749 | 1.23013811362014  | -0.49391130868293 |
| C | -4.61646672822124 | 0.41284135314405  | -1.47254694247699 |
| C | -4.66854726516255 | 1.54147665172901  | 0.78035028915083  |
| C | -4.00163958004324 | 0.29064594062697  | 1.38196971143689  |
| C | -3.22113654907795 | -0.44133857573499 | 0.28421725982398  |
| N | -4.02535509229107 | -0.77754358407180 | -0.88490380841159 |
| H | -4.75868984386904 | -1.42812193662659 | -1.38196971143689 |
| C | -5.51971696111360 | 2.31772369082626  | 1.77502502813838  |
| H | -3.85272080700374 | 2.19618515304095  | 0.45118461899312  |
| H | -3.27767833122495 | 0.64504653775861  | 2.12265681456743  |
| C | -4.95957146024457 | -0.66328186019478 | 2.09090173714507  |
| H | -5.23475647424397 | 0.13345022437624  | -2.32583308582459 |
| H | -3.81051578030281 | 1.05347389448517  | -1.84397906931714 |
| F | -6.59948704834861 | 0.49606963798729  | -0.18397239256941 |
| H | -5.78235455412738 | 2.15488891539493  | -0.96280931005813 |
| H | -2.39723935310647 | 0.19333285061582  | -0.05788243100214 |
| H | -2.78204882940124 | -1.35653033052443 | 0.68520176049206  |
| H | -5.67685129073597 | -1.10323591968677 | 1.39790804724905  |
| H | -5.52420169867570 | -0.15883618807611 | 2.87450682615423  |
| H | -4.39428887092636 | -1.47380657723111 | 2.55410920152700  |
| H | -6.42603772957312 | 1.76972576143715  | 2.03108435782847  |
| H | -5.81465546497628 | 3.28157491144691  | 1.35727905369119  |
| H | -4.96245867178262 | 2.50010133565707  | 2.69541984054859  |

**8C\_ae, Water**

|   |                   |                   |                   |
|---|-------------------|-------------------|-------------------|
| C | -5.43605813589013 | 1.21839628876526  | -0.49694031253341 |
| C | -4.59918373494564 | 0.42124049033219  | -1.47629418898903 |
| C | -4.66875468083812 | 1.53440262244908  | 0.77819648148723  |
| C | -3.99654567332258 | 0.28543042163935  | 1.37538839358133  |
| C | -3.19253787840470 | -0.41704620602864 | 0.27975238100440  |
| N | -4.05544849535606 | -0.76545601599494 | -0.84065555672114 |
| H | -3.53837234442631 | -1.30731602475212 | -1.52051413075079 |
| C | -5.51587403522154 | 2.31432823314822  | 1.77366213216873  |
| H | -3.85474703038159 | 2.18961408678634  | 0.44640951868914  |
| H | -3.28147291580679 | 0.64209112026431  | 1.2298705523814   |
| C | -4.95692332605740 | -0.67502436002343 | 2.07102054247503  |
| H | -5.21342068223090 | 0.13303156135580  | -2.32933641808862 |
| H | -3.81187846073175 | 1.09990581100277  | -1.84057243206233 |
| F | -6.60285048725054 | 0.49843865308113  | -0.19348795725280 |
| H | -5.77011443074181 | 2.14452671547822  | -0.96926814631155 |
| H | -2.37359362311448 | 0.24815857561863  | -0.0364022583840  |
| H | -2.74568544843144 | -1.33044252192927 | 0.67488410876832  |
| H | -5.65773920016841 | -1.11082501247154 | 1.36131856712942  |
| H | -5.52888323250805 | -0.17079750792362 | 2.85034061282377  |
| H | -4.39647616838653 | -1.48492005321355 | 2.54120282034215  |
| H | -6.42239918873294 | 1.77101685674191  | 2.03845271204229  |
| H | -5.81015225390397 | 3.27769378608102  | 1.35404374470473  |
| H | -4.95283857314882 | 2.50059247959289  | 2.68991233063899  |

**8C\_ee, Gas Phase**

|   |                   |                   |                   |
|---|-------------------|-------------------|-------------------|
| C | -5.45866864169348 | 1.06562093882224  | -0.48486948581549 |
| C | -4.58572373472965 | 0.30461858627467  | -1.48113315541525 |
| C | -4.66168430948703 | 1.43144817637231  | 0.78310315500095  |
| C | -4.01228282363095 | 0.16104191948548  | 1.32236140915405  |
| C | -3.16627257865765 | -0.54336727131905 | 0.27578939832594  |
| N | -4.01864901868796 | -0.87529085261980 | -0.85083477420628 |
| H | -3.52299175666717 | -1.44408029019664 | -1.52183503394108 |
| H | -5.20131864412934 | -0.01168273112776 | -2.32493604174795 |
| H | -3.81344839638849 | 0.98204971649421  | -1.87899590456096 |
| H | -2.3205513902338  | 0.10732792935028  | 0.00882148427537  |
| H | -2.76215191274869 | -1.45884675308589 | 0.70710787898730  |
| F | -3.21254418768212 | 0.46024535947335  | 2.41673625521651  |
| H | -4.78828471238065 | -0.52640467577775 | 1.66774373711343  |
| H | -5.37509178551804 | 1.77675294893119  | 1.53794384916267  |
| C | -3.64364733977227 | 2.54699551844249  | 0.56242356740180  |
| H | -6.25180707181796 | 0.37577329781145  | -0.17962365554547 |
| C | -6.10207182412842 | 2.28169093445995  | -1.13765357690863 |
| H | -2.98387973070996 | 2.34518264349589  | -0.28155173540353 |
| H | -3.02497763180305 | 2.67317539136207  | 1.4491578097341   |
| H | -4.14930592351242 | 3.49209177757905  | 0.36884796164307  |
| H | -5.35091609960437 | 2.94144629469410  | -1.57482990665137 |
| H | -6.67295837347105 | 2.86185242028249  | -0.41071019588508 |
| H | -6.78187836375587 | 1.97933872079569  | -1.93510310117342 |

**8C\_aa, Gas Phase**

|   |                   |                   |                   |
|---|-------------------|-------------------|-------------------|
| C | -5.44631689890879 | 1.22270388840578  | -0.49012031023383 |
| C | -4.61495721745942 | 0.41415025992443  | -1.47165264793292 |
| C | -4.66732429963725 | 1.54359721262145  | 0.77956944349374  |
| C | -3.99940479779406 | 0.29329521937829  | 1.38273051354056  |
| C | -3.22395906027671 | -0.44313030070007 | 0.28238682730623  |
| N | -4.02217333575143 | -0.77035894057216 | -0.88673544384251 |
| H | -4.74440612138769 | -1.43990940835859 | -0.65300828737714 |
| C | -5.52002835964524 | 2.31771806413249  | 1.77428687755776  |
| H | -3.85161810915263 | 2.19829555790128  | 0.44771812199117  |
| H | -3.27380367303087 | 0.64796704269248  | 1.22261177381668  |
| C | -4.96019538021897 | -0.65484204198950 | 2.09496797964975  |
| H | -5.22901011713914 | 0.13284276019590  | -2.32715840176662 |
| H | -3.80849938867840 | 1.05581952988101  | -1.84285836395937 |
| F | -6.58637892365865 | 0.48036221172660  | -0.17467161446737 |
| H | -5.79963621569949 | 2.14754837461053  | -0.95558989986821 |
| H | -2.39261067978072 | 0.18419457704309  | -0.05714271052765 |
| H | -2.78862375693139 | -1.36154061578715 | 0.68003661530208  |
| H | -5.69333363518112 | -1.07661432106689 | 1.40827301307328  |

**8C\_ee, Water**

|   |                   |                   |                   |
|---|-------------------|-------------------|-------------------|
| C | -5.46011409783577 | 1.06520159014133  | -0.48069115542824 |
| C | -4.58933227071967 | 0.30386531034508  | -1.47763047994382 |
| C | -4.66118677168474 | 1.43312345539077  | 0.78622368854974  |
| C | -4.02151400062022 | 0.15776389189493  | 1.31785195775643  |
| C | -3.17088815962643 | -0.54520300270925 | 0.27660386715087  |
| N | -4.02128243568055 | -0.88494100220480 | -0.85357866639077 |
| H | -3.49042413193298 | -1.41379096419378 | -1.53310853544136 |
| H | -5.20272337254544 | -0.00653470586332 | -2.32493173131385 |
| H | -3.81034277303226 | 0.97521043269992  | -1.86837927295193 |
| H | -2.33251011691672 | 0.10923537312283  | -0.00041360380112 |
| H | -2.75986641175367 | -1.45807191201615 | 0.70723075419733  |
| F | -3.21612419469712 | 0.44943170287819  | 2.42528293181441  |
| H | -4.79864031384425 | -0.52415470628510 | 1.66940859480003  |
| H | -5.37481650014394 | 1.78136321268395  | 1.53913749121619  |
| C | -3.63976819790618 | 2.54449263514573  | 0.55808453334601  |
| H | -6.25672153465809 | 0.38119200317378  | -0.17010361103583 |

|   |                   |                  |                   |
|---|-------------------|------------------|-------------------|
| C | -6.10265050074274 | 2.28097472013253 | -1.13527069690054 |
| H | -2.97667599145857 | 2.33194426185985 | -0.28063643539377 |
| H | -3.02513829313468 | 2.68610137090443 | 1.44612249753425  |
| H | -4.14673009683555 | 3.48597677252277 | 0.35040526838243  |
| H | -5.34999217562209 | 2.93556621511101 | -1.57807927470150 |
| H | -6.66846986868474 | 2.86451739255867 | -0.40683569846017 |
| H | -6.78519778992354 | 1.97371664270665 | -1.92873242298479 |

|   |                   |                   |                   |
|---|-------------------|-------------------|-------------------|
| H | -6.05416504145776 | 0.28740893731689  | -1.10986546497504 |
| H | -4.82393188615823 | 1.43717983902592  | -1.65837764776797 |
| F | -3.56066815074677 | 0.47832346669356  | 2.26736959493022  |
| H | -2.20582449687302 | 1.74813281454362  | 1.52660408565382  |
| H | -2.42353024598962 | 1.02258414338765  | -0.77121944592636 |
| H | -2.19073293720973 | -0.37711343444831 | 0.27611938311893  |
| H | -6.12163062746171 | 2.53779929264044  | 0.01425482144028  |
| F | -6.13148786534694 | 1.03752486784881  | 1.33216774710245  |
| H | -5.14410426956246 | 4.04311138186752  | 1.87816179274397  |
| H | -3.52802660397386 | 3.69148321281170  | 2.49407160591508  |
| H | -4.88948446619772 | 2.65934014850664  | 2.94854026914051  |

### 8C\_ea, Gas Phase

|   |                   |                   |                   |
|---|-------------------|-------------------|-------------------|
| C | -5.47895455108928 | 1.07545202939813  | -0.46695918896806 |
| C | -4.62124397564974 | 0.28217347167776  | -1.45692584204227 |
| C | -4.66741337649571 | 1.44034703904001  | 0.79280975791955  |
| C | -4.02265472700800 | 0.16972814685747  | 1.34021965385114  |
| C | -3.20096030005962 | -0.56276976875831 | 0.28979971124535  |
| N | -3.98866807910003 | -0.89378894990804 | -0.88380982386443 |
| H | -4.6864655079255  | -1.59171685686107 | -0.65623438774249 |
| H | -5.22891566125817 | -0.02469405318012 | -2.31016300271986 |
| H | -3.83112772008007 | 0.92605882052732  | -1.85741698816117 |
| H | -2.36350012566770 | 0.06957504824299  | -0.01786473691288 |
| H | -2.77800293332877 | -1.47116575359062 | 0.71812707693152  |
| F | -3.21405098673961 | 0.47314219162719  | 2.42738460033562  |
| H | -4.80569658086088 | -0.50231512963532 | 1.70742240515295  |
| C | -5.36967154684525 | 1.79917235607020  | 1.55183050435813  |
| C | -3.64074657509506 | 2.54509735978180  | 0.55643623956331  |
| H | -6.28826695274961 | 0.40732075884062  | -0.14813463520083 |
| C | -6.10431305360875 | 2.299161570835814 | -1.13596291576125 |
| H | -2.99008051768559 | 2.33565001517574  | -0.29308381967347 |
| H | -3.01340540079983 | 2.66958533772319  | 1.43724113852339  |
| H | -4.14019238256932 | 3.49388836289482  | 0.36511385418391  |
| H | -5.33923347234332 | 2.94098209192312  | -1.56468243159268 |
| H | -6.68486522397980 | 2.88173038671351  | -0.42506038560888 |
| H | -6.76915030619334 | 1.98770138708143  | -1.94554678381660 |

### 9A\_a, Chloroform

|   |                   |                   |                   |
|---|-------------------|-------------------|-------------------|
| C | -5.44825688954170 | 1.74034232625536  | 0.33825421917575  |
| C | -5.14195985050280 | 0.84395746838995  | -0.84620314952211 |
| C | -4.18641640563803 | 2.34572715068341  | 0.93586614013699  |
| C | -3.13514147870724 | 1.27869327019076  | 1.19808974099230  |
| C | -4.46482028979119 | 3.20521147462850  | 2.15747773620749  |
| H | -3.76664919760140 | 2.98243239271900  | 0.14920848822754  |
| H | -2.87474845484509 | 0.42818736523378  | -0.03081169882180 |
| N | -4.11607234601109 | -0.13757808794638 | -0.52204757457449 |
| C | -4.35679885906307 | -1.43308142132212 | -0.75997118032549 |
| O | -5.39492161902348 | -1.87956274194538 | -1.19323634784245 |
| C | -3.21056227081339 | -2.44591554511654 | -0.48800105223588 |
| F | -2.83762999382833 | -2.45344035582344 | 0.79393112956825  |
| F | -2.13250366028369 | -2.17145307431017 | -1.23160428991132 |
| F | -3.61367454828964 | -3.66538619011394 | -0.79972092319319 |
| H | -6.04014067152824 | 0.32677051382697  | -1.16688610451248 |
| H | -4.78622134146332 | 1.47181481118636  | -1.66866746577884 |
| F | -3.54373400249061 | 0.44412511445562  | 2.23213601059573  |
| H | -2.20011878072523 | 1.74567430745034  | 1.51065014301525  |
| H | -2.43897967911816 | 1.06253975409692  | -0.80802778383541 |
| H | -2.15839115440988 | -0.34590384401895 | 0.21357604789037  |
| H | -6.12225686362572 | 2.53552456384904  | 0.01361572440818  |
| F | -6.12778826526324 | 1.00047792756283  | 1.30028409247411  |
| H | -5.15978468449952 | 4.00743624599384  | 1.90792485090707  |
| H | -3.54060817937395 | 3.65695013161284  | 2.51906542959689  |
| H | -4.89645051356195 | 2.61186650546140  | 2.96122781735754  |

### 8C\_ea, Water

|   |                   |                   |                   |
|---|-------------------|-------------------|-------------------|
| C | -5.47433962221296 | 1.07403675254729  | -0.46734857101967 |
| C | -4.61521710876895 | 0.28872816890606  | -1.46047511858039 |
| C | -4.66411981574869 | 1.44106891355259  | 0.79296393202871  |
| C | -4.02945612709062 | 0.16521021621166  | 1.33120371292953  |
| C | -3.19788953164050 | -0.56204192514673 | 0.28764254919958  |
| N | -3.98864816038507 | -0.89732769098137 | -0.88744415140415 |
| H | -4.70804714463675 | -1.56539114003056 | -0.63103618510240 |
| H | -5.22637359114536 | -0.01468048704076 | -2.31218215940897 |
| H | -3.82234529649786 | 0.93315370317192  | -1.85415503105940 |
| H | -2.36387364577265 | 0.07455660566368  | -0.02092851880295 |
| H | -2.77933491930348 | -1.47113422077989 | 0.71926763332999  |
| F | -3.21578167989408 | 0.46032620021883  | 2.43345665096776  |
| H | -4.81076825633963 | -0.50633128398387 | 1.69673857294458  |
| H | -5.36994884193618 | 1.79841942814057  | 1.54903959720076  |
| C | -3.63627771239559 | 2.54442264810717  | 0.55440818577475  |
| H | -6.27819997234522 | 0.40068636663944  | -0.14851521929474 |
| C | -6.10685410243422 | 2.28800161678657  | -1.13368382840201 |
| H | -2.97746885200920 | 2.32493926411662  | -0.28636262506365 |
| H | -3.01771617103200 | 2.68639534064479  | 1.43962512676969  |
| H | -4.13855700975933 | 3.48814570440183  | 0.34550613398996  |
| H | -5.34604917074281 | 2.94124060665211  | -1.56483132626081 |
| H | -6.68748242190735 | 2.87296744298983  | -0.41827310872042 |
| H | -6.77283084600148 | 1.97737776921221  | -1.94007625201575 |

### 9A\_e, Gas Phase

|   |                   |                   |                   |
|---|-------------------|-------------------|-------------------|
| C | -5.48697840765020 | 1.14233212479594  | 0.37672191333676  |
| C | -5.08370817267993 | 0.57704390054743  | -0.97896333702117 |
| C | -4.30760358021308 | 1.77010140865258  | 1.11888191796802  |
| C | -3.18438426697832 | 0.73630844687002  | 1.20859779984421  |
| C | -2.82649057401570 | 0.14442973311034  | -0.14965251287955 |
| N | -4.02513898155249 | -0.39132506585993 | -0.77685398574753 |
| C | -4.05658907133988 | -1.70241404300478 | -1.10777411091039 |
| O | -3.15872074457921 | -2.47795918303991 | -0.91419420327073 |
| C | -5.34359197923271 | -2.24149915299540 | -1.78956518325578 |
| F | -6.41503506986186 | -2.08207187982948 | -1.00113334904849 |
| F | -5.21104626467642 | -3.52582639849319 | -2.04342499408212 |
| F | -5.58546411908515 | -1.61177362297372 | -1.94470707418260 |
| H | -5.94664570456116 | 0.12779795877469  | -1.45495584222258 |
| H | -4.72339101963851 | 1.38014094881449  | -1.62638386912629 |
| H | -2.39388999314334 | 0.92013464329145  | -0.78623539453525 |
| H | -2.10045916384320 | -0.65416180115269 | -0.03452513220394 |
| H | -3.46936060444655 | -0.07449482111335 | 1.88416053105621  |
| F | -2.05307848129560 | 1.32788269288658  | 1.73423084416377  |
| H | -4.63897005356266 | 1.99246947295524  | 2.13590815123876  |
| C | -3.84302042825114 | 3.06907678414192  | 0.47093663626630  |
| F | -6.47119005696665 | 2.08839110339115  | 0.17841488849368  |
| H | -5.92219543890370 | 0.33474631940358  | 0.97250096665472  |
| H | -3.43679292794185 | 2.91695994070769  | -0.52882605317763 |
| H | -3.06483714760899 | 3.52706014366912  | 1.07706562328761  |
| H | -4.67682774797172 | 3.76327034644423  | 0.39231576935401  |

### 9A\_a, Gas Phase

|   |                   |                   |                   |
|---|-------------------|-------------------|-------------------|
| C | -5.45512787027931 | 1.74095195247107  | 0.35706678056840  |
| C | -5.15620419058618 | 0.82142409669314  | -0.81399652655789 |
| C | -4.18433055880674 | 2.35433880133483  | 0.93352908020464  |
| C | -3.14573155628344 | 1.27936164157165  | 1.22393350274246  |
| C | -4.45435103923639 | 3.23957996592982  | 2.13784482835228  |
| H | -3.75952242334648 | 2.96863988384269  | 1.3042173274128   |
| C | -2.88797496283584 | 0.40679736776603  | 0.00792761375217  |
| N | -4.12571664628895 | -0.14956776851917 | -0.48989707698386 |
| C | -4.35073709405174 | -1.44772467504440 | -0.79031464494911 |
| O | -5.36873977490733 | -1.87181059909165 | -1.26880557025316 |
| C | -3.19954978469821 | -2.45703660019659 | -0.52974071521990 |
| F | -2.83893919945733 | -2.49129385418475 | 0.75547880673064  |
| F | -2.11541670238530 | -2.13660285520320 | -1.25256537319031 |
| F | -3.57870160585890 | -3.66742202756391 | -0.88257917931353 |

### 9A\_e, Chloroform

|   |                   |                   |                   |
|---|-------------------|-------------------|-------------------|
| C | -5.48251928987853 | 1.13832033811716  | 0.38580012955400  |
| C | -5.08552373894697 | 0.57291924728380  | -0.97127291363372 |
| C | -4.30550573658974 | 1.77654341801861  | 1.12041337251264  |
| C | -3.18997112509796 | 0.73681771518718  | 1.21187083493644  |
| C | -2.82806975137055 | 0.14271787691369  | -0.14386563710139 |
| N | -4.02782275604698 | -0.40023802737642 | -0.76779242320203 |

|   |                   |                   |                   |
|---|-------------------|-------------------|-------------------|
| C | -4.06026305435480 | -1.69788463564478 | -1.10839564381474 |
| O | -3.16083471537425 | -2.48515230497698 | -0.92630937057405 |
| C | -5.34456815834385 | -2.23563827778977 | -1.79757335758250 |
| F | -6.42105468648834 | -2.09207953228208 | -1.01757131624226 |
| F | -5.20221592558960 | -3.52277916694310 | -2.05798240257561 |
| F | -5.58281069988256 | -1.60805872201961 | -2.95271711033610 |
| H | -5.95139171341149 | 0.12727997978948  | -1.44504643928145 |
| H | -4.71632941924513 | 1.36936969331707  | -1.62049802247202 |
| H | -2.40640794305108 | 0.91602404108828  | -0.78943090848446 |
| H | -2.09646524404705 | -0.64903759394469 | -0.02270513136135 |
| H | -3.47560623689487 | -0.06692240800102 | 1.89309571644373  |
| F | -2.04881725503481 | 1.32719069480759  | 1.73561989819770  |
| H | -4.63550621285757 | 2.00077381149951  | 2.13707080085783  |
| C | -3.84042577428118 | 3.07070999378721  | 0.46292891810547  |
| F | -6.47487731939869 | 2.08415539593629  | 0.18300517989753  |
| H | -5.91542352128714 | 0.33728556675271  | 0.98948149020012  |
| H | -3.43562628469583 | 2.91285057069126  | -0.53653578792552 |
| H | -3.06424557223143 | 3.53476257722594  | 1.06777604075382  |
| H | -4.67312786559960 | 3.76668974856268  | 0.38317408312794  |

|   |                   |                   |                   |
|---|-------------------|-------------------|-------------------|
| H | -3.52122013158488 | -1.25379417604100 | -1.37964763898764 |
| H | -4.89805224756318 | -1.33313508305734 | -0.50148551845706 |
| H | -5.17976747081585 | 0.17961778054128  | -2.33825015803623 |
| H | -3.77722024058348 | 1.09660654136894  | -1.74633766300468 |
| H | -2.49556057192717 | 0.23725583785983  | 1.8500815497818   |
| H | -2.99468611596810 | -1.28538951849218 | 0.95370990435501  |
| H | -5.60802125689544 | 2.04996061077141  | 1.47536250140545  |
| C | -3.80048610037288 | 2.76719937296938  | 0.59483577913362  |
| F | -5.94686256790603 | 2.38920314812369  | -1.18550667198824 |
| H | -6.43581986256529 | 0.68161996714459  | -0.28402573790411 |
| H | -5.05882182961532 | -0.24161721755984 | 1.79128255124494  |
| F | -3.48670502756039 | 0.73914132921741  | 2.52158799766468  |
| H | -2.98830113387317 | 2.47677211364072  | -0.07308732308217 |
| H | -3.36172937409121 | 3.03920657955819  | 1.55195209748588  |
| H | -4.27501409938386 | 3.65110776306262  | 0.17521211560730  |

### 9B\_a, Gas Phase

|   |                   |                   |                   |
|---|-------------------|-------------------|-------------------|
| C | -5.45193866615970 | 1.36399006016270  | -0.39389279031403 |
| C | -4.62052417341690 | 0.60236747888402  | -1.40929972729781 |
| C | -4.65421734169565 | 1.72471275122165  | 0.85620157197702  |
| C | -3.96027731788801 | 0.49434211303645  | 1.43374716093902  |
| C | -3.15111985488633 | -0.25503315275494 | 0.39170132874539  |
| N | -4.07662524971798 | -0.61578673493062 | -0.72892100867075 |
| C | -5.50457620776775 | 2.44335304785815  | 1.89294582024188  |
| H | -3.85676731798076 | 2.40171032809504  | 0.52717350796554  |
| H | -3.60966414287655 | -1.22503500854274 | -1.39998005871272 |
| H | -4.86809419375394 | -1.13815295028105 | -0.33190835419805 |
| H | -5.23168686252584 | 0.28122876808563  | -2.24864692553573 |
| F | -4.89427603564828 | -0.40463739622564 | 1.91022469215948  |
| H | -3.30873729285754 | 0.78000701637416  | 2.26099619449334  |
| H | -3.77805989706306 | 1.19290733766211  | -1.76575735102924 |
| H | -5.85560109026851 | 2.26472704046198  | -0.85875190757179 |
| F | -6.50828763979698 | 0.53571075657287  | -0.06856832383990 |
| H | -2.35142868660286 | 0.36030904259785  | -0.01744299912358 |
| H | -2.74040214295434 | -1.17232443310605 | 0.80529014948145  |
| H | -6.31008922057616 | 1.80524274542524  | 2.24896913877272  |
| H | -5.94088958300999 | 3.34664684054817  | 1.46758775234392  |
| H | -4.89490708255286 | 2.73946434885503  | 2.74614212917385  |

### 9B\_e, Water

|   |                   |                   |                   |
|---|-------------------|-------------------|-------------------|
| C | -5.54067222218610 | 1.26890842875274  | -0.49359676418266 |
| C | -4.63602659621625 | 0.49895789989335  | -1.44228471625350 |
| C | -4.83951787050552 | 1.67747951486300  | 0.79979301071082  |
| C | -4.26357639516222 | 0.41222557738968  | 1.43108442070758  |
| C | -3.35382442983604 | -0.35981297140173 | 0.48916008670140  |
| N | -4.11017074689123 | -0.70345515862552 | -0.74371101207665 |
| H | -3.50040874519692 | -1.22034757403962 | -1.37845149851860 |
| H | -4.87611302781672 | -1.34308680995202 | -0.51941078223305 |
| H | -5.18410108249329 | 0.16780017933066  | -2.31896824086612 |
| H | -3.78141798275097 | 1.09785657149950  | -1.74893644313315 |
| H | -2.49517520964378 | 0.23672343712814  | 0.18924611458917  |
| H | -3.01555996508991 | -1.28443978016644 | 0.94651160904616  |
| H | -5.60613797407931 | 2.05786283237325  | 1.47758885592871  |
| C | -3.79135004082546 | 2.76181414470753  | 0.58659277616784  |
| F | -5.97157038550967 | 2.39455261904475  | -1.17202798591892 |
| H | -6.42504875952657 | 0.66923632948569  | -0.26833204806362 |
| H | -5.07153135721260 | -0.23915797232878 | 1.77113054122115  |
| F | -3.50830497070545 | 0.74077409825194  | 2.5422777302343   |
| H | -2.98959111069413 | 2.45227295048067  | -0.08383794254304 |
| H | -3.34564532022571 | 3.03606475262027  | 1.54063910306664  |
| H | -4.25941580743212 | 3.64877093069294  | 0.16440314262642  |

### 9B\_a, Water

|   |                   |                   |                   |
|---|-------------------|-------------------|-------------------|
| C | -5.45825946458241 | 1.36240484292247  | -0.38842028197239 |
| C | -4.63967522346081 | 0.58824461931467  | -1.39535728105083 |
| C | -4.66213946872031 | 1.71613785509336  | 0.85913788668333  |
| C | -3.96798908761028 | 0.49220607522695  | 1.43832967037409  |
| C | -3.17393756454329 | -0.26615961353654 | 0.40015501546430  |
| N | -4.05390972728815 | -0.61538373615773 | -0.74692440270432 |
| C | -5.49767980634613 | 2.45414758391714  | 1.89239640639998  |
| H | -3.85964951985140 | 2.35918827649782  | 0.52019921464995  |
| H | -3.52344786631043 | -1.14943288977618 | -1.43514188029097 |
| H | -4.80504775809712 | -1.23168878389950 | -0.42647388615452 |
| H | -5.25239398405402 | 0.25740376659892  | -2.22817131619279 |
| F | -4.91282873449625 | -0.38539593275092 | 1.97005304141107  |
| H | -3.30151406340152 | 0.78521001574899  | 2.24911610270753  |
| H | -3.81680332325569 | 1.19779551801459  | -1.76337409462385 |
| H | -5.83793318914559 | 2.26700007916283  | -0.86253986781150 |
| F | -6.55826407550435 | 0.57590277251560  | -0.04615386695422 |
| H | -2.36407958605536 | 0.35187698659597  | 0.01820857713734  |
| H | -2.77132325195565 | -1.18763647594884 | 0.80899731354984  |
| H | -6.30907873090647 | 1.82921635593110  | 2.26070080261427  |
| H | -5.92608090442940 | 3.35599583308484  | 1.45503730854360  |
| H | -4.87613467089435 | 2.74871685144446  | 2.73803553822011  |

### 9C\_ae, Gas Phase

|   |                    |                   |                   |
|---|--------------------|-------------------|-------------------|
| C | -5.46173496677802  | 1.35316368217072  | -0.39609754814270 |
| C | -4.61450930920961  | 0.56904482944749  | -1.38420668127221 |
| C | -4.66569408142099  | 1.70450269572243  | 0.85650489269216  |
| C | -3.96568615519059  | 0.48012601141352  | 1.43707483293180  |
| C | -3.18377380338321  | -0.26443230477721 | 0.36799105951465  |
| N | -4.04362561036881  | -0.59381460073591 | -0.74503529155596 |
| C | -5.49900055539979  | 2.44520767454281  | 1.88885040523505  |
| H | -3.86017014402523  | 2.36518558698550  | 0.51382522339907  |
| H | -3.58403858677454  | -1.19881881231732 | -1.40815486030756 |
| H | -5.24185875951191  | 0.25325862015016  | -2.21706383362814 |
| F | -4.88604868792165  | -0.36654967188669 | 2.02353806785479  |
| H | -3.278088829366254 | 0.79925249092604  | 2.22856229578502  |
| H | -3.85279420253679  | 1.26591545472111  | -1.77656738576726 |
| H | -5.80933300633035  | 2.27539509211405  | -0.87141821088690 |
| F | -6.58865623010278  | 0.62806233780528  | -0.06113726260391 |
| H | -2.33446855735807  | 0.38175859000641  | 0.08358831152045  |
| H | -2.77987096969771  | -1.18064991735860 | 0.79734058465386  |
| H | -6.30828550899941  | 1.81430282276176  | 2.24996121342339  |
| H | -5.93190419111459  | 3.34841802519850  | 1.45683501938996  |
| H | -4.88382838021340  | 2.73887139310994  | 2.74041916776445  |

### 9B\_e, Gas Phase

|   |                   |                   |                   |
|---|-------------------|-------------------|-------------------|
| C | -5.54252852205044 | 1.278244839638951 | -0.50272262171501 |
| C | -4.63698524200036 | 0.49781271005697  | -1.45163360192472 |
| C | -4.83958873223821 | 1.67236120729485  | 0.79752204204872  |
| C | -4.25345972854503 | 0.41381597462360  | 1.439383484660123 |
| C | -3.34750588928065 | -0.36681902436826 | 0.49142326734990  |
| N | -4.11682385517544 | -0.71817431310383 | -0.74616432277506 |

### 9C\_ae, Water

|   |                   |                   |                   |
|---|-------------------|-------------------|-------------------|
| C | -5.45566364804336 | 1.35549301759801  | -0.39685012155847 |
| C | -4.61709218933014 | 0.56516767787212  | -1.38073091831638 |
| C | -4.66877296136213 | 1.70277838307930  | 0.85833708174124  |
| C | -3.96237068320668 | 0.48373950742320  | 1.43310839709295  |
| C | -3.18927523397965 | -0.26701565473034 | 0.36804723709014  |
| N | -4.06098174616400 | -0.61367961148795 | -0.74045578188112 |
| C | -5.49763550368133 | 2.45008980965800  | 1.89006872807773  |
| H | -3.86412954689393 | 2.36267303857697  | 0.51611647851473  |
| H | -3.55555682702822 | -1.16905906128537 | -1.41760280747854 |
| H | -5.23703137601195 | 0.26273317913527  | -2.22407518182320 |
| F | -4.89700691015383 | -0.37695480131331 | 2.01998894882670  |

H -3.28629290908570 0.79323032938428 2.23206831217572  
H -3.84081709315487 1.24853652134604 -1.75800770710179  
H -5.81609033537080 2.27056909872903 -0.86999433019292  
F -6.59304888356597 0.61417749009427 -0.05671673075565  
H -2.35411089900383 0.38229402855676 0.06356062591091  
H -2.76903247119770 -1.17535644025811 0.79847479748080  
H -6.31160088917826 1.83038979687047 2.26237820146962  
H -5.92469917245549 3.35290946830459 1.45161658785843  
H -4.87496072113216 2.74548422244678 2.73547818286912

H -3.35846805455739 3.03159591738100 1.55197482376599  
H -4.27725859857447 3.64788765740902 0.17239649551389

### 9C\_ee, Water

C -5.52479734481900 1.26213656518417 -0.50827854216136  
C -4.60075582915292 0.48937447850431 -1.43251539671592  
C -4.84108192880494 1.66790571284037 0.79664579197392  
C -4.24703438799590 0.40466737604261 1.41801427631678  
C -3.34881564452709 -0.34918658746450 0.45361026806661  
N -4.13922174085119 -0.69116041949621 -0.71875157477878  
H -3.60867594625317 -1.28941405217190 -1.33693710372822  
H -5.15676666625130 0.18018044079771 -2.31678011240377  
H -3.78036587473493 1.14340992748177 -1.75634612225724  
H -2.47234034787233 0.26787637671681 0.21537382706795  
H -2.99964137693326 -1.26389723818286 0.93109187544666  
H -5.61068158040414 2.04462460160458 1.47484970406890  
C -3.79849044215709 2.76119048919746 0.59076154503539  
F -5.96950843903773 2.40766672468022 -1.16923146314181  
H -6.40836403916505 0.65771233459997 -0.29592493907731  
H -5.04592268255654 -0.25700853286806 1.75725151399343  
F -3.50595105382927 0.75256077260563 2.54788038541998  
H -2.99863396270869 2.45206975294563 -0.08100998316131  
H -3.35085099161185 3.03337815018958 1.54482642608901  
H -4.26775972033358 3.64828312679270 0.16940962394697

### 9C\_aa, Gas Phase

C -5.45991080824701 1.37163851904429 -0.38993723137525  
C -4.63861920354830 0.54487574558879 -1.36605211043810  
C -4.66029013093719 1.72291433474418 0.86087194103240  
C -3.96309235388882 0.49791025664582 1.44436273607657  
C -3.21612732141307 -0.28325296936732 0.37557306645274  
N -4.04597319617019 -0.63098066544453 -0.76056217241643  
C -5.50097971235305 2.45342724514290 1.89451558477922  
H -3.85589574038379 2.38639909674133 0.52054511256225  
H -4.77641296128030 -1.26866325826346 -0.46707383450189  
H -5.26562762771121 0.24535244145310 -2.20553100587421  
F -4.90137921115285 -0.34862149395307 2.02141807601847  
H -3.28317249597793 0.80711715174293 2.24362615023461  
H -3.83560109413112 1.17470926988883 -1.76403808699908  
H -5.81882547830991 2.28847225150802 -0.86674767441972  
F -6.58477652930860 0.63564520244209 -0.03935151873141  
H -2.37776255155304 0.32660720994850 0.02187135998348  
H -2.79907801077817 -1.19001274555830 0.81307432350978  
H -6.30586559959736 1.81177337472005 2.24677471558991  
H -5.94076292308040 3.35483895562882 1.46637390161375  
H -4.89187705017770 2.74448971734703 2.75099666690293

### 9C\_ea, Gas Phase

C -5.54461327113793 1.28089759325348 -0.49758046316897  
C -4.63959274287525 0.47071069512740 -1.41534002392839  
C -4.84300089330051 1.67797535141267 0.80233296723761  
C -4.25789515900911 0.41765773490477 1.44175689732840  
C -3.38761421911023 -0.36839814150126 0.47096803778227  
N -4.10175157527382 -0.70107425412396 -0.74832241426948  
H -4.82474890460117 -1.38733015840742 -0.57361939568064  
H -5.19018201144035 0.16567150772378 -2.30460438761245  
H -3.80889725757959 1.09689294180105 -1.75008721394768  
H -2.50710306035219 0.22473221668459 0.21178442775817  
H -3.03099969949701 -1.28097473893108 0.94745598240963  
H -5.60135026340458 2.07483925218295 1.48221716913680  
C -3.79040293324324 2.75840150004691 0.58416095792383  
F -5.97826593363230 2.41953051036120 -1.15700921107521  
H -6.43652795127381 0.68782979412395 -0.26968242709713  
H -5.06893177627638 -0.22986836531894 1.79112210450474  
F -3.51468388610234 0.76572257827044 2.55790954712606  
H -2.99501959272689 2.43785000370209 -0.08785296153071  
H -3.33614360307089 3.02898402162050 1.53499214844915  
H -4.25399526609241 3.64409995706690 0.15491825865400

### 9C\_aa, Water

C -5.45495662567927 1.37270583430357 -0.39186379058665  
C -4.63905951069792 0.54590015429152 -1.36830903701458  
C -4.66322058941673 1.71876664549111 0.86130648469292  
C -3.95941596111528 0.49972435452298 1.44053843583340  
C -3.21366349536907 -0.28380698546839 0.37648943589382  
N -4.04383592518508 -0.63508451261926 -0.76421774914255  
C -5.50115220515529 2.45348654620215 1.89474110078727  
H -3.86041086127192 2.38309182217352 0.52249306522592  
H -4.77687635648682 -1.26926444103823 -0.46675897389353  
H -5.26692795899927 0.25001829825987 -2.20844625974008  
F -4.90497833849659 -0.35676226632414 2.02470828857791  
H -3.28287549625656 0.80479744655121 2.24113595356072  
H -3.83852092063399 1.18077577690193 -1.76012738116305  
H -5.81705889052884 2.28577894645326 -0.86819726519172  
F -6.59281985098137 0.63055670781852 -0.04030151512773  
H -2.37903354115846 0.33155229912106 0.02705603836921  
H -2.79530204138172 -1.18851373636321 0.81698387189335  
H -6.31018930355848 1.82062927594996 2.25561627431804  
H -5.93584623885905 3.35486779461358 1.46137093801113  
H -4.88588588876830 2.74542003915900 2.74649208469619

### 9C\_ea, Water

C -5.54175761181992 1.27098621945375 -0.49392603264046  
C -4.63496523622148 0.47335414035751 -1.41788646478819  
C -4.84249653358431 1.67800661521008 0.80210705265774  
C -4.26328901835206 0.41299319699447 1.43331907735612  
C -3.38235464840786 -0.36580247018952 0.46928362236847  
N -4.09927137325750 -0.70415226486649 -0.75117346296414  
H -4.84336978044420 -1.36290180737630 -0.55012417058407  
H -5.19027186515300 0.16733409620149 -2.30375699606223  
H -3.80334563502619 1.10094002613913 -1.74808032478541  
H -2.50508293215961 0.23176144246067 0.20889354581667  
H -3.03034817479656 -1.27867144236944 0.94835549340395  
H -5.60317475267734 2.07058182391091 1.48144218056415  
C -3.78809393187567 2.75687032271100 0.58202151246136  
F -5.98498885085213 2.41685681239766 -1.15846841491362  
H -6.43106884565739 0.67802396802728 -0.26765330040028  
H -5.07191790303408 -0.23455078919378 1.78046036693201  
F -3.51823389048674 0.75974447877925 2.56282906592720  
H -2.99367604581425 2.43500474338656 -0.09071056734937  
H -3.33405448445299 3.03193454305646 1.53229706011822  
H -4.24995848592671 3.64583634490931 0.15629075688186

### 9C\_ee, Gas Phase

C -5.52332791480280 1.26934631957569 -0.51496442156869  
C -4.59748514051885 0.49066227228386 -1.43541053806306  
C -4.84037094348412 1.66522075700586 0.79486215559367  
C -4.23828383314447 0.40716970734068 1.42213316977249  
C -3.34462524866526 -0.34870661667607 0.45225189838261  
N -4.13635673115215 -0.68347352562863 -0.71735311646826  
H -3.64236485105584 -1.31731343771473 -1.32715250439531  
H -5.15640481148501 0.17949966262351 -2.31725431594342  
H -3.78316341752760 1.15015449137762 -1.76630157332046  
H -2.46304233297660 0.26618612917024 0.22353539117036  
H -2.99978300423352 -1.26480861063801 0.93046336984232  
H -5.61083114128697 2.04071709080105 1.47321818062729  
C -3.80380623977084 2.76471894934820 0.59593423108471  
F -5.96013752548826 2.40843688509611 -1.17032603812917  
H -6.40411343927101 0.65764446273534 -0.30624918971093  
H -5.03536371169774 -0.26099051195853 1.75639218290110  
F -3.49991436165690 0.75665450178611 2.54034660896270  
H -3.00055869865019 2.46176789868168 -0.07455681001784

### 10A\_a, Gas Phase

|   |                   |                   |                   |
|---|-------------------|-------------------|-------------------|
| C | -5.49324781692372 | 1.37914126383482  | -0.08839416538179 |
| C | -4.86764354502281 | 0.58978391110263  | -1.23178586525016 |
| C | -4.47014465034097 | 1.67274209456630  | 0.99200170373785  |
| C | -3.78010194448774 | 0.40161102447590  | 1.44944776406432  |
| C | -3.17445706803361 | -0.34196695090718 | 0.26534482225528  |
| N | -4.19509751704161 | -0.60468528975683 | -0.73376135457524 |
| C | -4.47919158967193 | -1.79236111774168 | -1.30179073660231 |
| O | -5.30026541454156 | -1.96533799923491 | -2.16655368226643 |
| C | -3.69078146713869 | -3.03471240983643 | -0.80490459391536 |
| F | -3.87929440346100 | -3.24770715733378 | 0.50494000460950  |
| F | -2.37534889266884 | -2.89478862633680 | -1.01162066739861 |
| F | -4.09063844391347 | -4.10982768278264 | -1.45184965164969 |
| H | -5.61683704502710 | 0.28294385212633  | -1.95422035598426 |
| H | -4.12984878400145 | 1.21437830945899  | -1.74281639541247 |
| H | -2.39373751023898 | 0.27233631394672  | -0.19101299183528 |
| H | -2.71834766789841 | -1.26582592310925 | 0.59785483037343  |
| H | -4.51500506763390 | -0.23782239511382 | 1.94407275000619  |
| H | -3.00031548239534 | 0.64435815379012  | 2.17068081432576  |
| H | -4.92824116096856 | 2.19323834859040  | 1.83408232988748  |
| F | -3.50569330909610 | 2.52935002118523  | 0.4654253848970   |
| H | -5.90271805546355 | 2.31570673185388  | -0.46818371922338 |
| H | -6.31424316403066 | 0.80932552722198  | 0.35223387674547  |

### 10A\_a, Chloroform

|   |                   |                   |                   |
|---|-------------------|-------------------|-------------------|
| C | -5.49062641428588 | 1.37715656409479  | -0.09253581917011 |
| C | -4.86005985175973 | 0.59661568613852  | -1.23880345530115 |
| C | -4.48096530632912 | 1.66386707418063  | 0.99955107674473  |
| C | -3.77707968858676 | 0.39771116968462  | 1.44281201811515  |
| C | -3.16715358635722 | -0.33693710182003 | 0.25611779075470  |
| N | -4.18856007070410 | -0.60433253292359 | -0.74617303341121 |
| C | -4.48042280297929 | -1.78740484817726 | -1.29155550154606 |
| O | -5.31160653258012 | -1.97650183304105 | -2.15496091450976 |
| C | -3.69478249368019 | -3.03082301704828 | -0.79181839615786 |
| F | -3.87450507755677 | -3.24336438230576 | 0.51663315738538  |
| F | -2.38183350269055 | -2.90804548842395 | -1.01381816176369 |
| F | -4.11034306899136 | -4.10931195261312 | -1.43420066128129 |
| H | -5.60886888917853 | 0.30306389694814  | -1.96602048473708 |
| H | -4.11370353460956 | 1.21648876710550  | -1.74155096754393 |
| H | -2.39521762388284 | 0.28125527537708  | -0.20773089354528 |
| H | -2.70149669639135 | -1.25615949460087 | 0.58755860654665  |
| H | -4.50766129963440 | -0.24665826084340 | 1.93683093286574  |
| H | -2.99643070591792 | 0.63924374708575  | 2.16325342153374  |
| H | -4.94934036404109 | 2.16778819691419  | 1.84436738893799  |
| F | -3.51781433345727 | 2.54773607805961  | 0.49124826887635  |
| H | -5.89993193281500 | 2.31414904480883  | -0.47109113170292 |
| H | -6.31279622357095 | 0.80434341139962  | 0.34107950480191  |

### 10A\_e, Gas Phase

|   |                   |                   |                    |
|---|-------------------|-------------------|--------------------|
| C | -5.44409327954467 | 1.31117801682576  | -0.25151520409335  |
| C | -4.62930741163746 | 0.67313520164881  | -1.37341781966527  |
| C | -4.55985050085291 | 1.58697764834259  | 0.94989921269704   |
| C | -3.83180903502384 | 0.33493329391906  | 1.39928665692377   |
| C | -3.07707458394048 | -0.29321182867732 | 0.22953961769369   |
| N | -3.97704431532209 | -0.52831050702457 | -0.89041472260168  |
| C | -4.24846781573438 | -1.79779506168250 | -1.25342171950999  |
| O | -3.75136097699828 | -2.77659744630410 | -0.75848927170510  |
| C | -5.27410980487642 | -2.01216158463061 | -2.39953405733500  |
| F | -4.87834328148330 | -1.42189543847088 | -3.53371424035044  |
| F | -6.47532872511279 | -1.51302890199180 | -2.07581402514396  |
| F | -5.41998678287000 | -3.29855091619680 | -2.63860829736313  |
| H | -5.25681993513439 | 0.45453996451827  | -2.22861215950160  |
| H | -3.84868395471541 | 1.36135031526879  | -1.712435764882505 |
| H | -2.28089109320828 | 0.37647072084879  | -0.10981077068518  |
| H | -2.62765175458405 | -1.23860327269143 | 0.51575641369185   |
| H | -4.56321589887873 | -0.37737881526122 | 1.78678007641783   |
| H | -3.13721604491503 | 0.57573175747165  | 2.20481787225531   |
| H | -5.90107720554979 | 2.23693300496227  | -0.60026705219469  |
| H | -6.24125675655449 | 0.62707114015417  | 0.04775573815299   |
| F | -5.33479150706211 | 2.06957643708203  | 1.98975084711374   |
| H | -3.83446933600111 | 2.37000627188903  | 0.70317867002822   |

### 10A\_e, Chloroform

|   |                    |                   |                   |
|---|--------------------|-------------------|-------------------|
| C | -5.44648249902060  | 1.31937736319281  | -0.23774685592645 |
| C | -4.65011828902283  | 0.66168691015183  | -1.36044294483055 |
| C | -4.54403264930471  | 1.60100710044885  | 0.94602168942063  |
| C | -3.83036527813336  | 0.34785652994709  | 1.40877511701212  |
| C | -3.09313085325191  | -0.30345107486611 | 0.24154178702259  |
| N | -4.00907688151593  | -0.54675080687418 | -0.86810329464046 |
| C | -4.24977961264126  | -1.80021300396568 | -1.26235500469553 |
| O | -3.73672871616289  | -2.79309334354241 | -0.79217307140855 |
| C | -5.261433505158091 | -2.01269216518687 | -2.42169010445070 |
| F | -4.86374400075939  | -1.40751425297615 | -3.54546131759878 |
| F | -6.47623833160913  | -1.54741425269731 | -2.10954082753950 |
| F | -5.37974433331604  | -3.30371097736468 | -2.68014172214610 |
| H | -5.29094823725919  | 0.44623171137945  | -2.20595005527138 |
| H | -3.86179516080315  | 1.33342844160220  | -1.70998240782028 |
| H | -2.29940329197791  | 0.35617789721170  | -0.11876480174019 |
| H | -2.64551922596775  | -1.24437024372252 | 0.54181335209747  |
| H | -4.56701780898532  | -3.4994144007215  | 1.81271377153046  |
| H | -3.11887098014295  | 0.59017313089904  | 2.19859665006903  |
| H | -5.89293317286930  | 2.24460892666019  | -0.60026672936773 |
| H | -6.24689214943961  | 0.674043034016375 | 0.07975034016375  |
| F | -5.31132117446881  | 2.10552526292593  | 1.99535223314259  |
| H | -3.81727230176704  | 2.37640792377236  | 0.68876419697758  |

### 10B\_a, Gas Phase

|   |                   |                   |                   |
|---|-------------------|-------------------|-------------------|
| C | -5.48694681226254 | 1.04611901329964  | -0.46823400731261 |
| C | -4.61842752956454 | 0.34619557496348  | -1.49580277597288 |
| C | -4.67760064239436 | 1.38498272587294  | 0.77335018248207  |
| C | -4.04570394703100 | 0.13435472699748  | 1.36323207571419  |
| C | -3.18143653940865 | -0.56422356779289 | 0.33117677294260  |
| N | -3.99882358657227 | -0.88476851792486 | -0.89105052660585 |
| H | -3.41013924238952 | -1.34753699008932 | -1.58453701046344 |
| H | -4.73601464869150 | -1.54794555945120 | -0.64161842497009 |
| H | -5.17964709183032 | 0.03749355483508  | -2.37361477472170 |
| H | -3.79127005933020 | 0.98473828195174  | -1.80153432710673 |
| H | -2.37629109914043 | 0.08781741438084  | -0.00342346566255 |
| H | -2.76141614372492 | -1.49516074721726 | 0.70235874530631  |
| H | -6.34120797311861 | 0.42413617044696  | -0.1886888176848  |
| H | -5.88389637662015 | 1.95738958809213  | -0.91385227376587 |
| H | -5.29322084288916 | 1.89629030414968  | 1.51250979109934  |
| F | -3.65858832115091 | 2.24222850907727  | 0.39792241811815  |
| H | -3.42073398262559 | 0.39951400665420  | 2.21510783798533  |
| H | -4.83008516125531 | -0.53134448824593 | 1.73245564470220  |

### 10B\_a, Water

|   |                   |                   |                   |
|---|-------------------|-------------------|-------------------|
| C | -5.46993838076889 | 1.05475410329419  | -0.47486353274457 |
| C | -4.60518238038167 | 0.33699041942170  | -1.49264884415547 |
| C | -4.69252265422172 | 1.38288657956224  | 0.78384425053983  |
| C | -4.03047641353465 | 0.14460703530980  | 1.35404668709896  |
| C | -3.18375993686382 | -0.56436822808804 | 0.31493814833383  |
| N | -4.00882490064557 | -0.88679125318083 | -0.88443565358994 |
| H | -3.43225921992717 | -1.36486767707527 | -1.57609556443772 |
| H | -4.74951133110021 | -1.54229352048221 | -0.62936324948722 |
| H | -5.17676549248290 | 0.02761499268156  | -2.36179280378533 |
| H | -3.77047721248965 | 0.95689020931523  | -1.81330474137442 |
| H | -2.37117885180011 | 0.06879628767592  | -0.03458617055702 |
| H | -2.77554634607378 | -1.49584127502100 | 0.69393913288314  |
| H | -6.32223321833564 | 0.42987323029297  | -0.19905005813788 |
| H | -5.86135547148395 | 1.96687770149992  | -0.92277624572347 |
| H | -5.33479616593951 | 1.85588804171396  | 1.52476442926064  |
| F | -3.69382285006065 | 2.31078019728249  | 0.45921811711486  |
| H | -3.40081673618328 | 0.41193069062776  | 2.20138647686051  |
| H | -4.81198243770681 | -0.52344753656670 | 1.72253962190127  |

### 10B\_e, Gas Phase

|   |                   |                   |                   |
|---|-------------------|-------------------|-------------------|
| C | -5.43635797871924 | 1.07447001860310  | -0.49648451191756 |
| C | -4.58966732709615 | 0.33590558805703  | -1.51519691956601 |
| C | -4.64164461981149 | 1.40958652399877  | 0.75732012559890  |
| C | -3.99301906689031 | 0.16124410350274  | 1.33771676761398  |
| C | -3.15961852130775 | -0.56992993657221 | 0.30286611329347  |
| N | -4.01102042090974 | -0.90291428456373 | -0.89046183677226 |

|   |                   |                   |                   |
|---|-------------------|-------------------|-------------------|
| H | -3.46152811195208 | -1.41810495138013 | -1.57946485849184 |
| H | -4.77309812498355 | -1.51959749685593 | -0.59822814938776 |
| H | -5.16751793293885 | 0.03239860093717  | -2.38432761889614 |
| H | -3.73904764055631 | 0.93034587442222  | -1.84852464788534 |
| H | -2.34206941784252 | 0.04514318111785  | -0.07298558267650 |
| H | -2.75005307707145 | -1.49925388403358 | 0.69019017848350  |
| H | -6.30153732324707 | 0.47031921996315  | -0.20958430984184 |
| H | -5.81969045176891 | 1.98558208069074  | -0.95460746865111 |
| F | -5.49227324959520 | 1.93806982813914  | 1.68997637628150  |
| H | -3.88034102505944 | 2.16388196692198  | 0.53354945345169  |
| H | -3.35312758904350 | 0.42519129825379  | 2.17905279200879  |
| H | -4.77982812120644 | -0.49205773120209 | 1.72492409735453  |

### 10C\_aa, Gas Phase

|   |                   |                   |                   |
|---|-------------------|-------------------|-------------------|
| C | -5.47603680053546 | 1.06539693845350  | -0.47330073054945 |
| C | -4.60263833031395 | 0.29912039107611  | -1.46717662642346 |
| C | -4.69165960589900 | 1.38870708650821  | 0.78627127701636  |
| C | -4.02967397705795 | 0.15028535789599  | 1.36462701298587  |
| C | -3.21981532964451 | -0.57675723194784 | 0.29072269669023  |
| N | -3.99268334156981 | -0.89245886918332 | -0.89964870541076 |
| H | -4.70352485861848 | -1.58156491979424 | -0.68382698733413 |
| H | -5.17897928503805 | 0.01962717068705  | -2.34894380779159 |
| H | -3.79525592904086 | 0.95262492012768  | -1.80764173154704 |
| H | -2.38589460419595 | 0.05958500722254  | -0.01672042328659 |
| H | -2.78916869089668 | -1.49467881140697 | 0.69045552635250  |
| H | -6.33785010373320 | 0.45208684785989  | -0.19391470060034 |
| H | -5.85524859236117 | 1.98916728656071  | -0.91329410003915 |
| H | -5.32737200044774 | 1.87459320265471  | 1.52858566100612  |
| F | -3.69415911573242 | 2.30778331418131  | 0.45838073061377  |
| H | -3.39846356384466 | 0.43476341082989  | 2.20808481777670  |
| H | -4.81289587107011 | -0.51246110172522 | 1.74444009054006  |

### 10B\_e, Water

|   |                   |                   |                   |
|---|-------------------|-------------------|-------------------|
| C | -5.43974844910443 | 1.07009878750032  | -0.48810981631350 |
| C | -4.59028198550318 | 0.33137149371141  | -1.50517249412380 |
| C | -4.62972653243041 | 1.40745842490286  | 0.74712739535050  |
| C | -4.00354771761945 | 0.16051699162755  | 1.33782376345086  |
| C | -3.17002695666764 | -0.56775564023892 | 0.30021094904807  |
| N | -4.00632852917640 | -0.89380031170077 | -0.88942890529615 |
| H | -3.44207398734919 | -1.38839465187165 | -1.58022217519300 |
| H | -4.75380720961328 | -1.53635936223897 | -0.62091565416050 |
| H | -5.17403280705049 | 0.02194533869413  | -2.36616006146634 |
| H | -3.74890186506684 | 0.93423436977498  | -1.84293843259901 |
| H | -2.34938630947623 | 0.04854090594520  | -0.06304230350193 |
| H | -2.77063409398739 | -1.49922464175875 | 0.68834772287947  |
| H | -6.28988921704603 | 0.45020231833368  | -0.19336896647431 |
| H | -5.82589168350676 | 1.97707840411980  | -0.95091806086012 |
| F | -5.47262261434153 | 1.98173033762762  | 1.69584646806365  |
| H | -3.86312779895149 | 2.14948572790409  | 0.51363824656181  |
| H | -3.36286438873716 | 0.41736455946132  | 2.18020268899844  |
| H | -4.79854785437209 | -0.49421305179389 | 1.70280963563586  |

### 10C\_aa, Water

|   |                   |                   |                   |
|---|-------------------|-------------------|-------------------|
| C | -5.47064389788886 | 1.06443103633532  | -0.47685702844961 |
| C | -4.59834870059306 | 0.30018971504680  | -1.47115575624883 |
| C | -4.70000026068961 | 1.38134887821162  | 0.78904702037624  |
| C | -4.02500899166739 | 0.15024708891599  | 1.35985865011320  |
| C | -3.21490061661608 | -0.57678058482633 | 0.28802047908826  |
| N | -3.99497903103212 | -0.89977974230112 | -0.90167203317372 |
| H | -4.72874133182501 | -1.55518351769116 | -0.65182983220089 |
| H | -5.18157652450364 | 0.02359958468853  | -2.34912922722040 |
| H | -3.78681807663581 | 0.94804330945191  | -1.81416731966320 |
| H | -2.37932758517400 | 0.05517373626119  | -0.02566604023663 |
| H | -2.78923143137182 | -1.49366297446032 | 0.69503285375141  |
| H | -6.33071813499956 | 0.44820473880757  | -0.20127697837308 |
| H | -5.85157881577097 | 1.98732356036737  | -0.91731534722897 |
| H | -5.33929615516915 | 1.85998120878251  | 1.53054618207996  |
| F | -3.70093488837884 | 2.32456236947442  | 0.47149953823335  |
| H | -3.39377399594606 | 0.43352535482255  | 2.20378348501246  |
| H | -4.80544156173801 | -0.51540376188685 | 1.73838135414045  |

### 10C\_ae, Gas Phase

|   |                   |                   |                   |
|---|-------------------|-------------------|-------------------|
| C | -5.46099156021046 | 1.05225873520659  | -0.48567656608927 |
| C | -4.57254191525516 | 0.32157614348375  | -1.48441379831153 |
| C | -4.68974819124585 | 1.37835300231614  | 0.77953585317141  |
| C | -4.01963755671917 | 0.14043743689811  | 1.34577715648890  |
| C | -3.18576402375922 | -0.55700612782778 | 0.27855339620797  |
| N | -4.02565983484216 | -0.87634950415136 | -0.86574850084479 |
| H | -3.50464765275352 | -1.41473354519410 | -1.54394407432095 |
| H | -5.15935539376546 | 0.03121585143154  | -2.35568332343999 |
| H | -3.78573601311101 | 1.01101560714093  | -1.82323624858298 |
| H | -2.34481760990227 | 0.09769151438574  | 0.00762292803246  |
| H | -2.77227102424869 | -1.48176254897610 | 0.68061686546678  |
| H | -6.30478898442636 | 0.41278147734744  | -0.21619657401760 |
| H | -5.85449971876607 | 1.97168564217535  | -0.92034754477094 |
| H | -5.33787553979471 | 1.84652499812192  | 1.52278826188351  |
| F | -3.70335610977906 | 2.31558115781981  | 0.46923693741797  |
| H | -3.39942175917547 | 0.41865597582824  | 2.19847790380695  |
| H | -4.79940711224534 | -0.53918581600621 | 1.69738732790209  |

### 10C\_ee, Gas Phase

|   |                   |                   |                   |
|---|-------------------|-------------------|-------------------|
| C | -5.43543551066717 | 1.06495634280322  | -0.49571082254545 |
| C | -4.55856631964368 | 0.31754011014118  | -1.49588741084928 |
| C | -4.63398136720500 | 1.39855586470931  | 0.74588174915441  |
| C | -3.99753274116040 | 0.15485509645855  | 1.33189963741830  |
| C | -3.17303639361730 | -0.55980278489146 | 0.26541672333162  |
| N | -4.01499944379017 | -0.87638405459733 | -0.87407377661467 |
| H | -3.51218153391074 | -1.43606286747679 | -1.54845904250755 |
| H | -5.15343612406623 | 0.02613789549766  | -2.36109683786262 |
| H | -3.76561825009710 | 0.99522742905538  | -1.85328705180418 |
| H | -2.31990979299981 | 0.07969457842724  | -0.0156771272163  |
| H | -2.76697253429842 | -1.48519211441158 | 0.67302484282910  |
| H | -6.27547868971275 | 0.43114178602146  | -0.20479625005743 |
| H | -5.83085809753257 | 1.97855489663524  | -0.94092649169526 |
| F | -5.46142673860710 | 1.98933094313491  | 1.69081405182421  |
| H | -3.85919151784240 | 2.13342375713236  | 0.50212638415824  |
| H | -3.37169885139768 | 0.42215681710498  | 2.18404571858889  |
| H | -4.79170609345147 | -0.50780369574435 | 1.68142570435330  |

### 10C\_ae, Water

|   |                   |                   |                   |
|---|-------------------|-------------------|-------------------|
| C | -5.45916253095438 | 1.05465390462445  | -0.48698284031128 |
| C | -4.57487253668638 | 0.31621436226966  | -1.48331948782825 |
| C | -4.69898013957432 | 1.37315797348761  | 0.78421713675398  |
| C | -4.01686670013578 | 0.14227908529428  | 1.34558681381210  |
| C | -3.18972128151131 | -0.56143243819473 | 0.27754030875318  |
| N | -4.03188745046947 | -0.88867331594571 | -0.86702210198790 |
| H | -3.48831205515411 | -1.40100630605579 | -1.55011713463001 |
| H | -5.16011512205228 | 0.03343197991677  | -2.35777955069549 |
| H | -3.77710723760918 | 0.99288933666057  | -1.82137262912448 |
| H | -2.35103296320837 | 0.08885541702749  | -0.00944389718651 |
| H | -2.76995871686620 | -1.48166495439682 | 0.68270759686342  |
| H | -6.31171400794184 | 0.42658932145988  | -0.21720318043856 |
| H | -5.84677714224748 | 1.97549541145947  | -0.92420311710676 |
| H | -5.34783336448382 | 1.83811193929996  | 1.52635689862816  |
| F | -3.70923803272308 | 2.32955493379484  | 0.48067047908991  |
| H | -3.39191034648155 | 0.42266407906520  | 2.19425389579749  |
| H | -4.79503037190042 | -0.53238072976711 | 1.71086080961099  |

### 10C\_ee, Water

|   |                   |                   |                    |
|---|-------------------|-------------------|--------------------|
| C | -5.43768505164479 | 1.06448986950278  | -0.49439640761368  |
| C | -4.56270613772291 | 0.31333459381186  | -1.49360921272357  |
| C | -4.62862870864536 | 1.39516708105361  | 0.73997322184659   |
| C | -3.99955420532199 | 0.15425935851390  | 1.33341037142374   |
| C | -3.17808421552195 | -0.56351191861773 | 0.26645332939271   |
| N | -4.02258143725201 | -0.88904432458634 | -0.87440663465714  |
| H | -3.48772565481613 | -1.41242341742267 | -1.556135444047025 |
| H | -5.15522681867677 | 0.02975787586202  | -2.36258781500158  |
| H | -3.76265179893461 | 0.98399939255025  | -1.84222592441654  |
| H | -2.33289169195013 | 0.07847483714161  | -0.02499404621176  |
| H | -2.76487711132816 | -1.48414655206727 | 0.67671450616681   |
| H | -6.28117339986687 | 0.43453443694102  | -0.20145465278211  |
| H | -5.82648323752365 | 1.97795341449647  | -0.94558356205450  |



|   |                   |                   |                  |
|---|-------------------|-------------------|------------------|
| F | -5.46263439822687 | 1.99605397011696  | 1.69493864465599 |
| H | -3.85767157453303 | 2.13217955378717  | 0.50030832683758 |
| H | -3.36650507634793 | 0.42108937387263  | 2.18031515306698 |
| H | -4.79494948168684 | -0.50583754495629 | 1.68800014254071 |

### 10C\_ea, Gas Phase

|   |                   |                   |                   |
|---|-------------------|-------------------|-------------------|
| C | -5.44718003184861 | 1.07962238663514  | -0.48255605830008 |
| C | -4.58861929910582 | 0.29352357915851  | -1.47872758877086 |
| C | -4.63587616206024 | 1.41028102101517  | 0.75326728288765  |
| C | -4.00647095349546 | 0.16762675948090  | 1.34868086591018  |
| C | -3.20760039954959 | -0.58078444752301 | 0.27671888483724  |
| N | -3.98406847546948 | -0.89711962020237 | -0.90865254187674 |
| H | -4.69868340537517 | -1.57992472980855 | -0.68651679935883 |
| H | -5.17885479255914 | 0.01180378397972  | -2.35019148141627 |
| H | -3.77611258416325 | 0.93048619471900  | -1.84388463091262 |
| H | -2.35866767533684 | 0.03310348746316  | -0.04220932200995 |
| H | -2.79044072610895 | -1.50037530443460 | 0.68600948470202  |
| H | -6.30422589341440 | 0.47153359907805  | -0.18017373387623 |
| H | -5.82971791446835 | 1.99565431726259  | -0.93549569792105 |
| F | -5.45423894108285 | 2.01563161499180  | 1.69836734646425  |
| H | -3.85577383938865 | 2.13662687598988  | 0.50114106997736  |
| H | -3.36900267036764 | 0.43786023680763  | 2.19202648729143  |
| H | -4.80530623620556 | -0.47724975461302 | 1.72510643237250  |

### 10C\_ea, Water

|   |                   |                   |                   |
|---|-------------------|-------------------|-------------------|
| C | -5.44655959660868 | 1.07599671395509  | -0.48307183976811 |
| C | -4.58559943491444 | 0.29573098983933  | -1.48132645898956 |
| C | -4.62960997926150 | 1.40512064554334  | 0.74573611472752  |
| C | -4.00724306075360 | 0.16503995474418  | 1.34631477773001  |
| C | -3.20364465351315 | -0.57947715019296 | 0.27555323319641  |
| N | -3.98589084976688 | -0.90191404144235 | -0.90969034093089 |
| H | -4.71926283604073 | -1.55701014162410 | -0.65923808823797 |
| H | -5.18085016224068 | 0.01798196723786  | -2.35030295378064 |
| H | -3.77297002137032 | 0.93555733412378  | -1.83946778197516 |
| H | -2.35922119404645 | 0.04007345286645  | -0.04249396818184 |
| H | -2.78882041808998 | -1.49697037772357 | 0.69113570907080  |
| H | -6.29759818725721 | 0.45804624041790  | -0.18365114550936 |
| H | -5.82870954014170 | 1.99006283830349  | -0.94006686915351 |
| F | -5.45740330316870 | 2.01733283838087  | 1.70140194103133  |
| H | -3.85513576054665 | 2.13673862758936  | 0.50062103970978  |
| H | -3.36675686860219 | 0.43198590764910  | 2.18830912654517  |
| H | -4.80556413367713 | -0.48599579511775 | 1.71314750451603  |

### 11A\_a, Gas Phase

|   |                   |                   |                   |
|---|-------------------|-------------------|-------------------|
| C | -5.47163782932372 | 1.35940738804640  | -0.30074536535532 |
| C | -4.72873457889554 | 0.59869246323683  | -1.39418580688826 |
| C | -4.57121552736142 | 1.62463221224388  | 0.89072461096125  |
| C | -3.92866289739065 | 0.34079897567083  | 1.39739611800493  |
| C | -3.18896122970442 | -0.33963650113100 | 0.24769681245292  |
| N | -4.09458126673316 | -0.59736643030494 | -0.85442703474472 |
| C | -4.40242709975567 | -1.79796595603501 | -1.37832452748087 |
| O | -5.18399972489799 | -1.98127033383538 | -2.27720278805490 |
| C | -3.69201615076267 | -3.04322659528640 | -0.77998836958810 |
| F | -3.97197358913277 | -3.18864879610109 | 0.52365711909149  |
| F | -2.36185628127600 | -2.96071223445220 | -0.90561745930148 |
| H | -4.09120009029811 | -4.13248498769951 | -1.40296059678379 |
| H | -5.40222286219884 | 0.29877311076770  | -2.19052082550582 |
| H | -3.95086954274446 | 1.23868958571491  | -1.81808661023644 |
| H | -2.38981196919126 | 0.31850284108162  | -0.10603362361187 |
| H | -2.72943204791810 | -1.25719059823977 | 0.59442859344141  |
| H | -4.74547110441674 | -0.32077405883895 | 1.70396139140168  |
| C | -3.00087225641051 | 0.58104228546723  | 2.57465933786976  |
| H | -5.84138808708423 | 2.30596601898515  | -0.69657508349569 |
| H | -6.33355443055819 | 0.77933353904121  | 0.03598069217710  |
| H | -5.11851286127191 | 2.12242564685357  | 1.69420579781200  |
| F | -3.56186011364137 | 2.500991052009476 | 0.49423363077031  |
| H | -2.18653780839687 | 1.24828241570818  | 2.29309532430907  |
| H | -2.57141891325013 | -0.35942961677375 | 2.92069947633440  |
| H | -3.53889173738524 | 1.03335910578571  | 3.40767918642093  |

### 11A\_a, Chloroform

|   |                   |                   |                   |
|---|-------------------|-------------------|-------------------|
| C | -5.47153254417970 | 1.36452066027805  | -0.29756160078787 |
| C | -4.73533407871651 | 0.59613781764801  | -1.38879863573606 |
| C | -4.57565790486472 | 1.62834580253604  | 0.89494546223357  |
| C | -3.93191901249429 | 0.34718019867455  | 1.40108473837757  |
| C | -3.19975333733152 | -0.34749555643656 | 0.25560899191606  |
| N | -4.11113590887137 | -0.60795242149070 | -0.84599280279007 |
| C | -4.39671053768696 | -1.79812234803736 | -1.37783080319480 |
| O | -5.16770750859708 | -1.99172283406334 | -2.29444381153932 |
| C | -3.68269084886998 | -3.04472996965460 | -0.78605966720402 |
| F | -3.96889910423200 | -3.21461919581798 | 0.51007922426395  |
| F | -2.35387071770207 | -2.96005337468845 | -0.90790142991588 |
| H | -4.07519150641162 | -4.13134736939201 | -1.42882678246872 |
| H | -5.41306192479663 | 0.30876846365726  | -2.18510318347429 |
| H | -3.94601935573799 | 1.22093641085075  | -1.81286431137076 |
| H | -2.39776164540379 | 0.29825585639844  | -0.11211402060302 |
| H | -2.74643606442990 | -1.26453753222235 | 0.61145804163655  |
| H | -4.75185570606688 | -0.30433261986044 | 1.71918798625850  |
| C | -2.99597509853701 | 0.58851595888087  | 2.57212570468735  |
| H | -5.83611986219884 | 2.30997054047372  | -0.70023217780305 |
| H | -6.33633915294773 | 0.79232791686845  | 0.04397047413490  |
| H | -5.12330939893496 | 2.1257597137765   | 1.69661549743176  |
| F | -3.56174279967869 | 2.51308654262828  | 0.49985979986088  |
| H | -2.16828751500578 | 1.23459352324099  | 2.27901423861438  |
| H | -2.58384232393768 | -0.35505424773769 | 2.93054999102653  |
| H | -3.52695614236628 | 1.06367980578708  | 3.39697907644584  |

### 11A\_e, Gas Phase

|   |                   |                   |                   |
|---|-------------------|-------------------|-------------------|
| C | -5.42562394203148 | 1.36338568855010  | -0.31271337445271 |
| C | -4.65191849716132 | 0.63128335935347  | -1.41540433680308 |
| C | -4.46660258918714 | 1.65361721818381  | 0.83715841702974  |
| C | -3.80434257112374 | 0.39144556218310  | 1.35367970361534  |
| C | -3.13180157211790 | -0.36061030595131 | 0.20738917214676  |
| N | -4.05893444852078 | -0.58418666024275 | -0.89399008225923 |
| C | -4.32038644463594 | -1.84801119658902 | -1.28186951878628 |
| O | -3.85550039153189 | -2.83465008310075 | -0.77048767129493 |
| C | -5.27197871907616 | -2.05181399811735 | -2.49416238507439 |
| F | -4.81074892460958 | -1.43063500004888 | -3.58674714878030 |
| F | -6.50160512569735 | -1.58173637057466 | -2.24597662886378 |
| F | -5.37780430506700 | -3.3529616565652  | -2.76909098944202 |
| H | -5.31159687950376 | 0.41123189396695  | 0.24712993582480  |
| H | -3.84400192652464 | 1.26528783946854  | -1.79491059100367 |
| H | -2.28917534221354 | 0.22466659182989  | -0.17541797448779 |
| H | -2.75427182221833 | -1.32243742234770 | 0.53890110550700  |
| H | -5.75361677362222 | 2.32085588175729  | -0.72353504648062 |
| C | -6.64499861673815 | 0.56992214491205  | 0.13736512667616  |
| H | -4.55308337460590 | -0.24192811759320 | 1.83079663944283  |
| H | -3.06064527230552 | 0.64900659893991  | 2.10844161807693  |
| F | -5.14672366088159 | 2.27632835650861  | 1.87001174011242  |
| H | -3.69973634637208 | 2.35747631975576  | 0.49618909176578  |
| H | -6.37428881303858 | -0.43724884867477 | 0.45631605756870  |
| H | -7.35736227109928 | 0.47301501432641  | -0.68093558944259 |
| H | -7.13801137011612 | 1.06738169916103  | 0.97021260105453  |

### 11A\_e, Chloroform

|   |                   |                   |                   |
|---|-------------------|-------------------|-------------------|
| C | -5.42759184441725 | 1.36347792387318  | -0.30832351158949 |
| C | -4.66099131986665 | 0.62416932281417  | -1.40990038555757 |
| C | -4.45941945544814 | 1.6552634684386   | 0.83094925663362  |
| C | -3.8053033346874  | 0.39530956170221  | 1.35751335705955  |
| C | -3.13915314919902 | -0.36661777604425 | 0.21494913708710  |
| N | -4.07510947573877 | -0.59725031152711 | -0.88241777354807 |
| C | -4.31723784621172 | -1.84646386917534 | -1.28967485894433 |
| O | -3.84078343175188 | -2.84734738739594 | -0.79793716467255 |
| C | -5.26452660080344 | -2.04699031359915 | -2.50595518549171 |
| F | -4.80560407001867 | -1.42134911926982 | -3.59499889864028 |
| F | -6.49964594658496 | -1.59788815239101 | -2.26172551533832 |
| F | -5.35535850937184 | -3.33501731872755 | -2.79071282753088 |
| H | -5.32556265253075 | 0.40965030941719  | -2.23868436725195 |
| H | -3.8464763228014  | 1.24743158349771  | -1.78850888472957 |
| H | -2.30273286095898 | 0.21603904401676  | -0.18124985309586 |
| H | -2.75824625827642 | -1.32229927161561 | 0.55732824529843  |
| H | -5.75052034033377 | 2.31796953583609  | -0.72837688626814 |
| C | -6.64885713725532 | 0.57673274327346  | 0.14874751073746  |
| H | -4.55456118955427 | -0.23206082197486 | 1.84196313750424  |

|   |                   |                   |                   |
|---|-------------------|-------------------|-------------------|
| H | -3.05180150302785 | 0.65317206719646  | 2.10202037551306  |
| F | -5.13670270337875 | 2.29190578935093  | 1.87027233729364  |
| H | -3.69390234500773 | 2.35596642754619  | 0.48611806959801  |
| H | -6.37935162656694 | -0.42353247371070 | 0.49061062910119  |
| H | -7.35353922330325 | 0.46698141269885  | -0.67489005838317 |
| H | -7.15207954464472 | 1.08883474736431  | 0.96697411521557  |

|   |                   |                  |                   |
|---|-------------------|------------------|-------------------|
| H | -7.27125278370106 | 0.10686012563332 | -1.17429880139258 |
| H | -7.32119587907362 | 0.85061058675797 | 0.42199484938628  |

### 11B\_a, Gas Phase

|   |                   |                   |                   |
|---|-------------------|-------------------|-------------------|
| C | -5.51577249272795 | 1.04217001775287  | -0.54250499511221 |
| C | -4.65893985729486 | 0.33317784550226  | -1.57311541877916 |
| C | -4.69866492148117 | 1.37434909237704  | 0.69404315344044  |
| C | -4.08089710490699 | 0.11893651882471  | 1.30108518245087  |
| C | -3.21821598294296 | -0.57068808786750 | 0.25546644743943  |
| N | -4.03518148609477 | -0.89357005602711 | -0.96612188776987 |
| H | -3.44895378001472 | -1.35851540932391 | -1.66010433172409 |
| H | -4.77079477412949 | -1.55601335306895 | -0.71077741080745 |
| H | -5.23063621730689 | 0.01873549865566  | -2.44206030646093 |
| H | -3.83451329010737 | 0.96820174382823  | -1.89256950439389 |
| H | -2.41375865989711 | 0.08666248503317  | -0.07344423747814 |
| H | -2.79458383891468 | -1.50097063228804 | 0.62643356397568  |
| H | -6.37327276641365 | 0.42817933353534  | -0.25609713226217 |
| H | -5.90746409065119 | 1.95602470515204  | -0.98741157604811 |
| H | -5.30381561714838 | 1.89728988460855  | 1.4351963564888   |
| F | -3.67214403066931 | 2.22213034311388  | 0.31177020668857  |
| C | -3.26347611015563 | 0.43323229219497  | 2.54569207341830  |
| H | -4.90463977310683 | -0.54892318056072 | 1.57775342393561  |
| H | -2.48069780476476 | 1.15732830348540  | 2.32327982524021  |
| H | -2.80227489815690 | -0.46402580228789 | 2.95639925739610  |
| H | -3.90686250311440 | 0.85835845835999  | 3.31501403120192  |

### 11B\_e, Water

|   |                   |                   |                   |
|---|-------------------|-------------------|-------------------|
| C | -5.43050978135079 | 1.06946559808424  | -0.57047677966274 |
| C | -4.54482768561467 | 0.34184556983550  | -1.57366438603006 |
| C | -4.60604887198227 | 1.38810006883998  | 0.67235787732503  |
| C | -3.97324843252554 | 0.14581387676293  | 1.26795064731343  |
| C | -3.13874446078747 | -0.57993199510291 | 0.22906417596523  |
| N | -3.96745030600118 | -0.89307718082188 | -0.96960214202732 |
| H | -3.39644845289979 | -1.37465341618499 | -1.66403222544012 |
| H | -4.71215063815099 | -1.54575965454930 | -0.71887130474454 |
| H | -5.10837372590217 | 0.04568763724849  | -2.45401863426256 |
| H | -3.69780405457213 | 0.95278879371979  | -1.88105995499885 |
| H | -2.31581331374520 | 0.03871825194860  | -0.12514639375467 |
| H | -2.74318734735869 | -1.51517614326077 | 0.61178526496894  |
| C | -6.69967601400264 | 0.28737027864249  | -0.25308935759785 |
| H | -5.71021936228061 | 2.01369712196910  | -1.04074736035567 |
| H | -3.32518346728607 | 0.42123594000304  | 2.09875486359516  |
| H | -4.74968198426411 | -0.51499472949893 | 1.65711254547456  |
| F | -5.42381716602626 | 1.98163247253041  | 1.63057317635482  |
| H | -3.83381064364076 | 2.11875973887974  | 0.42249590741741  |
| H | -6.49355901023402 | -0.68391381549246 | 0.19883951956974  |
| H | -7.26959472041101 | 0.11938685253686  | -1.16618412199324 |
| H | -7.32340056096365 | 0.84458473391005  | 0.44303868288329  |

### 11B\_a, Water

|   |                   |                   |                   |
|---|-------------------|-------------------|-------------------|
| C | -5.50266988542642 | 1.04756191087937  | -0.54861415948859 |
| C | -4.64315192884136 | 0.32690259544712  | -1.56816325735468 |
| C | -4.72127731028047 | 1.37223418588837  | 0.70750737848627  |
| C | -4.07547252894565 | 0.12700093784026  | 1.29494231329947  |
| C | -3.22438200324708 | -0.57029981289128 | 0.24553900234764  |
| N | -4.04087476672097 | -0.89283799364167 | -0.95849561075616 |
| H | -3.45926176569381 | -1.36689367489183 | -1.64881726025031 |
| H | -4.77821396640171 | -1.55345187987708 | -0.70699996680973 |
| H | -5.22046636146169 | 0.01170265684582  | -2.43146342198596 |
| H | -3.81205891593283 | 0.94675324967180  | -1.89761722626176 |
| H | -2.41133152392155 | 0.07086946934640  | -0.09186275987612 |
| H | -2.81318827190476 | -1.50192571620279 | 0.62352734795023  |
| H | -6.35761063573777 | 0.42746054232743  | -0.27079698482100 |
| H | -5.89029724570322 | 1.96185567664534  | -0.99553565811762 |
| H | -5.35703733939625 | 1.85562245752347  | 1.44922322166637  |
| F | -3.71409629472702 | 2.28902087081644  | 0.37867641974101  |
| C | -3.25246817743043 | 0.43847585913283  | 2.53497177648866  |
| H | -4.89560705482785 | -0.54187132249578 | 1.57353809670096  |
| H | -2.44345302329807 | 1.13035956776601  | 2.30083483177024  |
| H | -2.81889274990782 | -0.47092275819990 | 2.94993917121903  |
| H | -3.88374825019328 | 0.89445317806967  | 3.29771764555203  |

### 11C\_ae, Gas Phase

|   |                   |                   |                   |
|---|-------------------|-------------------|-------------------|
| C | -5.49315244268074 | 1.04402401645664  | -0.56028549660532 |
| C | -4.60737249640689 | 0.31310367801782  | -1.56086769404510 |
| C | -4.72096201027066 | 1.36562843243198  | 0.70458975055173  |
| C | -4.06705712105976 | 0.12096860280174  | 1.28790990246873  |
| C | -3.22986660930602 | -0.56571192882737 | 0.21146905561570  |
| N | -4.05702128819921 | -0.88239430962843 | -0.94185795921495 |
| H | -3.52933528347558 | -1.41742480417003 | -1.61744507514808 |
| H | -5.19812772874716 | 0.01927038778653  | -2.42841159767306 |
| H | -3.82391339874995 | 1.00336420320086  | -1.90519478005414 |
| H | -2.38690973254271 | 0.09508228242604  | -0.04352698859279 |
| H | -2.81603287569181 | -1.49135977549750 | 0.61377053432305  |
| H | -6.33897548024374 | 0.40734579647093  | -0.29082143588855 |
| H | -5.88435849684186 | 1.96505415583168  | -0.99373351594700 |
| H | -5.36376125669075 | 1.84330839333117  | 1.44846425815780  |
| F | -3.72620595297345 | 2.29434349249889  | 0.39253176010569  |
| H | -3.25076707769118 | 0.44091935351444  | 2.52990225487779  |
| H | -4.88354594438081 | -0.55835443903952 | 1.55212168076192  |
| H | -2.44576753746471 | 1.13669612636871  | 2.29376726267287  |
| H | -2.80959145848192 | -0.46427344805527 | 2.94842703006422  |
| H | -3.87512580810109 | 0.89749978408068  | 3.29934102295949  |

### 11B\_e, Gas Phase

|   |                   |                   |                    |
|---|-------------------|-------------------|--------------------|
| C | -5.42684577843098 | 1.06852873430752  | -0.57605364672807  |
| C | -4.53739384039450 | 0.35188404001675  | -1.58323328843273  |
| C | -4.61678644246847 | 1.39079701420209  | 0.68272974465878   |
| C | -3.95694930154702 | 0.14903340968119  | 1.26683718684536   |
| C | -3.12769168191066 | -0.58311471752804 | 0.22851399576891   |
| N | -3.97554847175434 | -0.89971590620008 | -0.97066377480916  |
| H | -3.42839173470477 | -1.41309744299760 | -1.66215136030815  |
| H | -4.74831678806639 | -1.50871113319497 | -0.69098054298672  |
| H | -5.09389215839839 | 0.06577157800167  | -2.473111050504360 |
| H | -3.67884439350540 | 0.95445315627365  | -1.87922078653818  |
| H | -2.30546109249575 | 0.03008273653901  | -0.14007089679539  |
| H | -2.72514351817591 | -1.51734905352791 | 0.61110555535175   |
| C | -6.69721211180386 | 0.28437094814925  | -0.26552267304560  |
| H | -5.71310666637117 | 2.01429939667619  | -1.04038392796667  |
| H | -3.30646840324105 | 0.43236087742344  | 2.09354245595914   |
| H | -4.72441411853288 | -0.50891007565768 | 1.67926892915949   |
| F | -5.44657141182530 | 1.93287962379160  | 1.62859223053130   |
| H | -3.85510154758063 | 2.14027158191540  | 0.44545571924102   |
| H | -6.50696187601787 | -0.67972548026277 | 0.21272953714481   |

### 11C\_ae, Water

|   |                   |                   |                   |
|---|-------------------|-------------------|-------------------|
| C | -5.49378575953082 | 1.04392389377411  | -0.56138247827572 |
| C | -4.60802095732562 | 0.30978950894519  | -1.55906353080255 |
| C | -4.73420909416392 | 1.35993976494618  | 0.71019802476267  |
| C | -4.06748489715810 | 0.12220361025702  | 1.28842382192831  |
| C | -3.23483531541430 | -0.56959433750323 | 0.21230522041415  |
| N | -4.06108279290103 | -0.89338076831128 | -0.94380281070177 |
| H | -3.50730416920530 | -1.39874838274122 | -1.62385305346758 |
| H | -5.19390662923604 | 0.02474426109388  | -2.43244388559834 |
| H | -3.81378686045981 | 0.98976118173813  | -1.89817748592800 |
| H | -2.39400839903965 | 0.08839772693881  | -0.05531534393933 |
| H | -2.81550061642821 | -1.49119874435348 | 0.6175662378256   |
| H | -6.34641565635656 | 0.41521323408482  | -0.29368897863551 |
| H | -5.88164858592675 | 1.96562001791288  | -0.99665221481348 |
| H | -5.38028587563883 | 1.83179525638120  | 1.45253143207969  |
| F | -3.73920016634301 | 2.30961485853602  | 0.40573941704707  |
| C | -3.24488453018150 | 0.44253344470074  | 2.52661621536149  |
| H | -4.88359268328961 | -0.5527272487223  | 1.56547572893380  |
| H | -2.42201992439506 | 1.11542757576403  | 2.28301415213341  |
| H | -2.82410438532991 | -0.46809617108986 | 2.95435080006152  |
| H | -3.86177270167599 | 0.92187379379827  | 3.28831234565763  |

### 11C\_aa, Gas Phase

|   |                   |                   |                   |
|---|-------------------|-------------------|-------------------|
| C | -5.50752785752476 | 1.05925476294351  | -0.54969012996898 |
| C | -4.63483982080186 | 0.29114813954101  | -1.54303203429672 |
| C | -4.72485954012838 | 1.37556276926852  | 0.71164366602285  |
| C | -4.08435985580884 | 0.12764947726612  | 1.30667252977307  |
| C | -3.26835765143569 | -0.58824009079729 | 0.22585282160311  |
| N | -4.02471448637701 | -0.89934172254406 | -0.97462093082750 |
| H | -4.73396295706953 | -1.59325918687569 | -0.76989763087799 |
| H | -5.21296989960020 | 0.00939730745722  | -2.42288463274205 |
| H | -3.82854169905366 | 0.94439463424601  | -1.88620857243389 |
| H | -2.42963282036951 | 0.05358101937350  | -0.06194111745947 |
| H | -2.84043963606003 | -1.50742936850541 | 0.62888346500912  |
| H | -6.37323011460704 | 0.45037387292925  | -0.27326726754476 |
| H | -5.8808330656913  | 1.98542020718218  | -0.98994592281094 |
| H | -5.35489596956402 | 1.87248685364783  | 1.45374262151124  |
| F | -3.71594514616094 | 2.28330516255329  | 0.38429462805999  |
| C | -3.25030943521674 | 0.44894009286933  | 2.53585590961795  |
| H | -4.90951155883464 | -0.53443579296244 | 1.59441262377090  |
| H | -2.46135194311603 | 1.15872260439170  | 2.28716690660791  |
| H | -2.78363361114055 | -0.45320871634712 | 2.93334005001523  |
| H | -3.86352269056140 | 0.88749797436255  | 3.32433301697092  |

### 11C\_aa, Water

|   |                   |                   |                   |
|---|-------------------|-------------------|-------------------|
| C | -5.50437500540069 | 1.05608824957699  | -0.55253026891527 |
| C | -4.63023886273639 | 0.29336219274144  | -1.54639846876578 |
| C | -4.73509381303624 | 1.36912938038657  | 0.71451163507125  |
| C | -4.08002654965165 | 0.12896231101324  | 1.30228079358608  |
| C | -3.26244341947548 | -0.58599750923473 | 0.22392300561039  |
| N | -4.02473904203229 | -0.90484518991972 | -0.97658334323717 |
| H | -4.75619018595915 | -1.56724473682179 | -0.73934076144891 |
| H | -5.21320823500445 | 0.01419507844250  | -2.42368328035363 |
| H | -3.82082251732604 | 0.94330433352743  | -1.89004680647530 |
| H | -2.42315332565434 | 0.05366110542737  | -0.06873252138823 |
| H | -2.8385252970952  | -1.50394612378563 | 0.63354179971273  |
| H | -6.36648861989035 | 0.44155264914610  | -0.28016443929448 |
| H | -5.88223761805479 | 1.98046864645836  | -0.99272081492901 |
| H | -5.37025782235082 | 1.85735246662304  | 1.45558903551266  |
| F | -3.72760033147654 | 2.30210012002014  | 0.39596649933697  |
| C | -3.24651466066027 | 0.44786527234795  | 2.53282759537010  |
| H | -4.90150464273005 | -0.53616949762454 | 1.59003477530966  |
| H | -2.43949264575960 | 1.13843751788717  | 2.28487563819189  |
| H | -2.80131559847196 | -0.46096800117253 | 2.93979296683708  |
| H | -3.85918187461933 | 0.90451173496063  | 3.31156696026897  |

### 11C\_ee, Gas Phase

|   |                   |                   |                   |
|---|-------------------|-------------------|-------------------|
| C | -5.42694471208787 | 1.06754472829188  | -0.57847729871064 |
| C | -4.51807649132984 | 0.31811901021064  | -1.55999283158815 |
| C | -4.61063130707058 | 1.38453212665438  | 0.66989746424416  |
| C | -3.96908673931941 | 0.14769856980588  | 1.26604109015894  |
| C | -3.14004600175936 | -0.56392688039245 | 0.20073632607503  |
| N | -3.98257180264576 | -0.87948115263776 | -0.93805244764452 |
| H | -3.48654890584392 | -1.44519271959498 | -1.61190792468284 |
| H | -5.09723015782395 | 0.03152189351198  | -2.43880964975596 |
| H | -3.71829584240085 | 0.99861500273703  | -1.89567918965406 |
| H | -2.29064407020786 | 0.08116135785728  | -0.08021897029622 |
| H | -2.7291288879087  | -1.48790162042431 | 0.60656332252601  |
| C | -6.69703921676545 | 0.28713677568117  | -0.26361327366755 |
| H | -5.70527154807422 | 2.01938355922634  | -1.03830742808509 |
| H | -3.34145891896565 | 0.43347923226792  | 2.11081189117004  |
| H | -4.74832698558072 | -0.52135458251316 | 1.63369690928786  |
| F | -5.41423060551951 | 1.99875257588339  | 1.62125436320679  |
| H | -3.83001182757379 | 2.10714277418214  | 0.40931789446979  |
| H | -6.46506776246301 | -0.72306263504187 | 0.07001654618608  |
| H | -7.31801357011019 | 0.20825653073234  | -1.15659646350066 |
| H | -7.27590464566719 | 0.78882545356215  | 0.51040967026039  |

### 11C\_ee, Water

|   |                   |                  |                   |
|---|-------------------|------------------|-------------------|
| C | -5.42936294235583 | 1.06510296957511 | -0.57439453367230 |
| C | -4.52226443997828 | 0.31584040390349 | -1.55725619941552 |
| C | -4.60511870824017 | 1.37644258702524 | 0.66705722371259  |
| C | -3.96845772242925 | 0.14088513587842 | 1.26549405937786  |

|   |                   |                   |                   |
|---|-------------------|-------------------|-------------------|
| C | -3.14180401767938 | -0.56910083962616 | 0.19707920525548  |
| N | -3.98531750060534 | -0.89093374202408 | -0.94481220135869 |
| H | -3.45254472088698 | -1.41197012591685 | -1.62957477411866 |
| H | -5.09881165397881 | 0.03958459307808  | -2.44068780868150 |
| H | -3.71797973413867 | 0.99335016844526  | -1.88260858977613 |
| H | -2.30049621682819 | 0.08030044527925  | -0.09107957572491 |
| H | -2.72311584557678 | -1.48927943429061 | 0.60282494841371  |
| C | -6.70454424617066 | 0.29263236508852  | -0.25892584992902 |
| H | -5.70302448761665 | 2.01603451316725  | -1.03832491585452 |
| H | -3.33309378013889 | 0.42490367814302  | 2.10507125213932  |
| H | -4.74640769867529 | -0.52868098831799 | 1.63699020351312  |
| F | -5.41213944914527 | 1.99824930985022  | 1.63124768548756  |
| H | -3.82821355360046 | 2.10127748459661  | 0.41011159078983  |
| H | -6.48352862305572 | -0.69576927329136 | 0.14165628283810  |
| H | -7.29243306678786 | 0.16245409014957  | -1.16832572903197 |
| H | -7.31587159204781 | 0.82992665928698  | 0.46554772603564  |

### 11C\_ee, Gas Phase

|   |                   |                   |                    |
|---|-------------------|-------------------|--------------------|
| C | -5.43646078472431 | 1.07406885779122  | -0.56732798482654  |
| C | -4.54139487399297 | 0.29793609774190  | -1.549033168415968 |
| C | -4.61318051606321 | 1.39197485162508  | 0.67512747575578   |
| C | -3.97803164951816 | 0.15655945124849  | 1.28081254889383   |
| C | -3.17634526268836 | -0.59230266389892 | 0.21032083562311   |
| N | -3.94015294158130 | -0.89610029038575 | -0.98591900667088  |
| H | -4.64269160259431 | -1.59846661848854 | -0.79433737057127  |
| H | -5.11790926670029 | 0.02460486124067  | -2.43400333932259  |
| H | -3.72564507543622 | 0.94438101550965  | -1.88905421243492  |
| H | -2.32197382358286 | 0.02073638175233  | -0.09620951754482  |
| H | -2.76773921362542 | -1.51660202227908 | 0.61746378277290   |
| C | -6.70915383401683 | 0.30113267602682  | -0.24637768000717  |
| H | -5.71511929785537 | 2.02346819959694  | -1.03283883859501  |
| H | -3.33358833356523 | 0.44645622165660  | 2.11227215177103   |
| H | -4.76092005253795 | -0.49119604931969 | 1.68111417439186   |
| F | -5.41084719846716 | 2.01886224319758  | 1.62532212704976   |
| H | -3.82900511635576 | 2.10790851919896  | 0.40685845029206   |
| H | -6.49261221552865 | -0.69262660782817 | 0.14775985129932   |
| H | -7.30640016455815 | 0.17584826511130  | -1.15038569366462  |
| H | -7.31011877660748 | 0.82643661050261  | 0.49340392635783   |

### 11C\_ee, Water

|   |                   |                   |                   |
|---|-------------------|-------------------|-------------------|
| C | -5.43641352502071 | 1.07418998402723  | -0.56562736930343 |
| C | -4.54159202274222 | 0.30150495017228  | -1.54993884826858 |
| C | -4.60513423958799 | 1.38797123638058  | 0.66912058440404  |
| C | -3.97885364962756 | 0.15336702777964  | 1.27872675976678  |
| C | -3.17356749448251 | -0.59110818182709 | 0.20865090815613  |
| N | -3.94470330578649 | -0.90058994527207 | -0.98699351768649 |
| H | -4.66569507487096 | -1.57762594338125 | -0.76547380947346 |
| H | -5.12306309091559 | 0.03330960357209  | -2.43295027570173 |
| H | -3.72537098818190 | 0.94966253143249  | -1.88354637600797 |
| H | -2.32469913992329 | 0.02837245408094  | -0.09802711378112 |
| H | -2.76615329162078 | -1.51355527191997 | 0.62034898932161  |
| C | -6.70713890300425 | 0.29574685867632  | -0.24742966031927 |
| H | -5.71306973879437 | 2.02236635942191  | -1.03411698690162 |
| H | -3.33101432125581 | 0.43861162930884  | 2.10908155286879  |
| H | -4.76150225920995 | -0.50027560312408 | 1.67001408195470  |
| F | -5.40542838024918 | 2.02573039005272  | 1.63083902067728  |
| H | -3.82339503293797 | 2.10492719284269  | 0.40438454685130  |
| H | -6.48747395530900 | -0.69404683927272 | 0.15460687953293  |
| H | -7.29313730129993 | 0.16188734202623  | -1.15756699060038 |
| H | -7.32188428517951 | 0.82263422502321  | 0.48086761551049  |

### 12A\_a, Gas Phase

|   |                   |                   |                   |
|---|-------------------|-------------------|-------------------|
| C | -5.35141246300015 | 1.51091190098500  | -0.22744175154024 |
| C | -4.75097492863428 | 0.58731432715781  | -1.29049461705169 |
| C | -4.48631126198562 | 1.68164107985408  | 1.00455445373019  |
| C | -4.07980532005669 | 0.33307566849497  | 1.56012083635346  |
| C | -3.39039948410220 | -0.49663740405993 | 0.48896694666155  |
| N | -4.25336876740094 | -0.65139600875851 | -0.67117720368673 |
| C | -4.40417978259490 | -1.79018083113426 | -1.37768352025543 |
| O | -4.96692806258518 | -1.86894156004381 | -2.44083516515922 |
| C | -3.83504136499833 | -3.10539182989043 | -0.77624092085501 |
| F | -4.33480044574165 | -3.35218345873907 | 0.4422988733912   |
| F | -2.50084063608902 | -3.05790797635571 | -0.66995592608268 |

F -4.14241715471841 -4.12385509596380 -1.55313070467157  
H -5.55229958678453 0.28126492302615 -1.95873691084377  
C -3.67102531620021 1.25692228894074 -2.13439247392534  
H -2.46322607741942 -0.00352416139365 0.18604274340769  
H -3.12848683535203 -1.46785346272002 0.88925141811261  
H -4.97541230203009 -0.18733675216333 1.90713732748581  
H -3.41146486714357 0.46635869643793 2.41000076698571  
H -5.01032007185931 2.27281511654980 1.75693147024701  
F -3.33226119748956 2.39046154162238 0.67600472973402  
H -5.55136943739959 2.48584572980475 -0.67367060994789  
H -6.30862543033422 1.10195300431275 0.10450380836220  
H -2.80632662083395 1.54068787887198 -1.53755302058709  
H -4.07165680947495 2.16446744019435 -2.58714308563766  
H -3.35659577577121 0.58713894496984 -2.93368847817504

C -4.10437718067973 0.31703309572238 1.40445469611537  
C -3.18727227644417 -0.36107603552547 0.38467384517181  
N -3.96707464662694 -0.64190430025864 -0.83879510534767  
C -4.54560983366559 -1.82898615047023 -1.06564890578709  
O -4.46812119239260 -2.81006247430286 -0.36126949730140  
C -5.37313498864754 -1.98596871067898 -2.37780788013001  
F -4.68591191509244 -1.61842440661626 -3.46318527255926  
F -6.49913772601089 -1.26232545553617 -2.33721416694778  
F -5.71966883216936 -3.25276806989812 -2.53307448299669  
H -2.45085022777012 0.37606649904418 0.05270042326496  
C -2.40540315138113 -1.51606128858145 0.98565780878327  
H -4.91302617072624 -0.36758223789919 1.67406762166428  
H -3.53694052549428 0.54851332670745 2.30705578098319  
H -5.66080038119334 2.28442221530808 -0.96816766024500  
H -6.24606979612665 0.72968138061696 -0.35550267218500  
F -5.61507115055093 2.12667327992060 1.70209300022369  
H -3.89198927466255 2.33542381834589 0.70452378081466  
H -4.89211055702261 0.41050052685574 -2.41553170049456  
H -3.52071852779780 1.19810397975461 -1.66905262234201  
H -3.03822111259037 -2.19063337959593 1.55453542426028  
H -1.66032704856307 -1.08753422601461 1.65716552389986  
H -1.88493891209209 -2.08861905050703 0.21992002068160

### 12A\_a, Chloroform

C -5.35603344450294 1.49267802846478 -0.23806440252682  
C -4.73117741056353 0.59432859483489 -1.30835009977205  
C -4.51108792426567 1.66288816603250 1.00586144785924  
C -4.06651911656572 0.32031910279730 1.54218284788779  
C -3.36012435497481 -0.48394082081135 0.46310127663469  
N -4.22238375960207 -0.64839691971820 -0.70013154855400  
C -4.42268013821989 -1.79359764674686 -1.36012477346411  
O -5.02454556936872 -1.89966787247535 -2.40835232634135  
C -3.86306144043875 -3.10697749247496 -0.74475501416363  
F -4.33312468417604 -3.32348612876829 0.48868404202231  
F -2.52720485268138 -3.09533386381404 -0.68185400278676  
H -4.21863445196493 -4.13678150019027 -1.49473325917476  
F -5.52363916987350 0.29322858385506 -1.98779398867518  
C -3.64632061325166 1.28699930101737 -2.12602764506762  
H -2.44910935354553 0.03182268908970 0.15243123516532  
H -3.06891329084242 -1.44944645683811 0.85602608809451  
H -4.94961645948426 -0.22185131248106 1.88731048084454  
H -3.39865310944799 0.45844381978230 2.39145742303879  
H -5.05777529516335 2.22534844536016 1.76220287040112  
F -3.36985452164647 2.41920568478222 0.70108738592086  
H -5.57176082723485 2.46815128232005 -0.67546463016047  
H -6.30733273798954 1.06104601319546 0.08047757103973  
H -2.79132523274623 1.56615981982743 -1.51315294163359  
H -4.05386055843277 2.19798561060629 -2.56524864712359  
H -3.31081168301698 0.63652487235297 -2.93316938946499

### 12B\_a, Gas Phase

C -5.46175214780796 1.02002285875724 -0.48898905739059  
C -4.56552293517118 0.36059892676318 -1.51790326630336  
C -4.67736261035401 1.37163487472208 0.76328057111658  
C -3.97956850697016 0.14593418382087 1.33267341557521  
C -3.11221129344531 -0.59685679670286 0.32104670103148  
N -3.93783748838290 -0.86916384385647 -0.92691197164132  
H -3.33808925208423 -1.31555039661417 -1.62248659638105  
H -4.67531860262954 -1.53908231654792 -0.69966675120607  
C -1.82848064954602 0.11511322428033 -0.05846312301922  
H -2.87114984622712 -1.58517812865751 0.71125539219455  
H -3.34861688488775 0.43684639172740 2.17212611999309  
H -4.74769862487932 -0.52217718950403 1.73121193426162  
H -6.29395476673232 0.36316702209295 -0.22225235227918  
H -5.88942072177813 1.92312221181409 -0.92197079990831  
H -5.33333363951917 1.80738105929949 1.51642993604200  
F -3.73730909214424 2.33011197335448 0.42732410626294  
H -5.11194628282555 0.05476806564878 -2.40621833489367  
H -3.75370928761687 1.02159557814947 -1.81200163182973  
H -1.25333841677120 -0.45760124110151 -0.78666080661686  
H -1.21813455898418 0.21204552924101 0.83811991472969  
H -2.00205439124283 1.11927801331312 -0.43537339973781

### 12A\_e, Gas Phase

C -5.34939520835138 1.33144649555853 -0.53303988188621  
C -4.38742822851261 0.60666016319802 -1.47428490752796  
C -4.70094313927076 1.57398612777928 0.81771811283284  
C -4.11010476941076 0.30219809958472 1.39672432944135  
C -3.17509492456623 -0.35510387937902 0.37924833679315  
N -3.93171157422477 -0.63088127463944 -0.85605891327744  
C -4.56226560488233 -1.81199900866670 -1.04181063560204  
O -4.52456673285091 -2.75614402230462 -0.29695749192992  
C -5.38216971320101 -1.98358190564477 -2.35617070708555  
F -4.68264438175669 -1.63593111123794 -3.44155257445337  
F -6.49530073946889 -1.23526475226587 -2.32946746336782  
F -5.74640869501485 -3.24206849265321 -2.49308183652623  
H -2.43982622281871 0.39323842760632 0.06599926387369  
C -2.39007624289128 -1.51441136164142 0.97074983932259  
H -4.91196581074424 -0.39609147158719 1.64988590217544  
H -3.56165194463914 0.53083120971938 2.31201072523912  
H -5.66527950010493 2.27812474890802 -0.97107941344308  
H -6.23793671616100 0.71288607849788 -0.38620387318192  
F -5.64284276732031 2.09086233617634 1.69036706482503  
H -3.91326271948189 2.32878690741374 1.071921150739474  
H -4.85827116666959 0.41248959065411 -2.43019031108224  
H -3.50507605595261 1.21900656922099 -1.67164882803328  
H -3.02375482429726 -2.19778586674802 1.52707578854114  
H -1.64215106845215 -1.09809452275993 1.64706123697864  
H -1.87322124895559 -2.08094908478919 0.19807472997932

### 12B\_a, Water

C -5.43827236984107 1.03355892064533 -0.49601194946165  
C -4.54874572153870 0.35065339018276 -1.51510612098783  
C -4.68601927562021 1.36539733489251 0.77605711465959  
C -3.97578281142964 0.14536291806062 1.33037720499210  
C -3.11473686076583 -0.59394010270811 0.31240121705126  
N -3.93958602183086 -0.87073038478187 -0.91547798352719  
H -3.35772534487255 -1.34047470193382 -1.60974051153114  
H -4.68037540990364 -1.53302379892395 -0.67907968421447  
C -1.83492003361145 0.12373021850970 -0.06992562495844  
H -2.86655623230092 -1.57674940981233 0.70718610123333  
H -3.34875205778744 0.42867934282701 2.17516710596252  
H -4.74613629696698 -0.52867881098395 1.71178330577567  
H -6.27608484736909 0.38237700285400 -0.23714631139855  
H -5.85110437710550 1.94137335589705 -0.93300063601583  
H -5.36305927748263 1.77324160187250 1.52493051605302  
F -3.75265653567665 2.37208568666652 0.49473356828398  
H -5.10866567127534 0.03503313389402 -2.38980294190193  
H -3.73343879467902 0.99438803785637 -1.83432952717072  
H -1.27074088120363 -0.45538996003875 -0.80039388602427  
H -1.22597484018702 1.64706123697864 0.82669338995638  
H -2.01747633855180 1.11988473418376 -0.4647443677584

### 12A\_e, Chloroform

C -5.35456264210378 1.33982797869985 -0.51977685164102  
C -4.40971924611465 0.59968894449719 -1.46510190362859  
C -4.68229268408126 1.58822074041204 0.81586078725311

### 12B\_e, Gas Phase

C -5.34266275915710 1.07264238129165 -0.50334917219774  
C -4.599640435807597 0.35823317033020 -1.54359536911422  
C -4.56108911957702 1.39408658978149 0.76074279113159

|   |                   |                   |                   |
|---|-------------------|-------------------|-------------------|
| C | -3.91321936936684 | 0.14188850472415  | 1.33132686110257  |
| C | -3.07502508408998 | -0.57595803168698 | 0.29150746684954  |
| N | -3.91731282474741 | -0.88742288160670 | -0.90954587793146 |
| H | -3.36911755624571 | -1.39581303986704 | -1.60548334288043 |
| H | -4.68884532160138 | -1.50353867633633 | -0.63865584092858 |
| C | -5.26873195593736 | -0.02762601517059 | -2.78441800220372 |
| H | -3.62431041720354 | 0.96100841161479  | -1.80584907171709 |
| H | -2.25264964103131 | 0.04216188036239  | -0.06817492270925 |
| H | -2.66962003356270 | -1.51110965704684 | 0.66912117443032  |
| H | -3.27813536619013 | 0.39803282690500  | 2.17842180803573  |
| H | -4.70129370350933 | -0.51690335176169 | 1.70624644659983  |
| H | -6.20498693593707 | 0.45306092090903  | -0.23592959337451 |
| H | -5.73341302550588 | 1.98932316364611  | -0.94478503208795 |
| F | -5.42236976844500 | 1.90954349318788  | 1.69245109767734  |
| H | -3.80134500270786 | 2.15423299906025  | 0.55283168360515  |
| H | -6.12721343531326 | -0.65265137724778 | -2.53311604304198 |
| H | -4.64345075402090 | -0.55149169440537 | -3.50778070522231 |
| H | -5.64538356777424 | 0.87365038331640  | -3.26463815602282 |

## 12B\_e, Water

|   |                   |                   |                   |
|---|-------------------|-------------------|-------------------|
| C | -5.3467760971689  | 1.06959349984117  | -0.49908925908039 |
| C | -4.49493193178371 | 0.35405241685223  | -1.53549182005169 |
| C | -4.55018473131766 | 1.39199805199920  | 0.74811378112342  |
| C | -3.92599396949418 | 0.14005830303687  | 1.32836717719544  |
| C | -3.08666977130553 | -0.57367653992788 | 0.28641947445473  |
| N | -3.91498010319250 | -0.88046674480158 | -0.91323647108189 |
| H | -3.34659693329007 | -1.37183664759157 | -1.60437087247421 |
| H | -4.66936571481688 | -1.52278720904018 | -0.65904970712845 |
| C | -5.27221548400788 | -0.02615837510924 | -2.77418459511954 |
| H | -3.63128235993433 | 0.96477102062076  | -1.80137072694662 |
| H | -2.26182560800544 | 0.04524329154869  | -0.06210854301385 |
| H | -2.69200848801779 | -1.51195346315397 | 0.66285727946088  |
| H | -3.28994261894184 | 0.38815336795600  | 2.17667883668782  |
| H | -4.72210270930892 | -0.52005558719422 | 1.68088313090415  |
| H | -6.19631868091181 | 0.43690019604109  | -0.22556709238082 |
| H | -5.73671769253780 | 1.98299086586508  | -0.94701190796990 |
| F | -5.40501805922984 | 1.95193540910567  | 1.69495546892499  |
| H | -3.78445674125850 | 2.13985281571591  | 0.53158503503884  |
| H | -6.11777182225946 | -0.66472240911377 | -2.51564162163615 |
| H | -4.6372288594116  | -0.5463546562377  | -3.49040933594770 |
| H | -5.65419011472779 | 0.87779320297353  | -3.24499823095869 |

## 12C\_ae, Gas Phase

|   |                   |                   |                   |
|---|-------------------|-------------------|-------------------|
| C | -5.42444947574738 | 1.03645905073249  | -0.50206534828551 |
| C | -4.51058314748787 | 0.34520246807239  | -1.50357254694610 |
| C | -4.66836682110172 | 1.35993471399248  | 0.77105222723261  |
| C | -3.96925996571446 | 0.13048282168572  | 1.32071063167549  |
| C | -3.13062047057446 | -0.61452680374194 | 0.27766617967989  |
| N | -3.95622974092711 | -0.85876779115866 | -0.9032922680853  |
| H | -3.43001729338153 | -1.38475099999801 | -1.58836405568689 |
| C | -1.79954213513037 | 0.07849499219723  | -0.01881688720141 |
| H | -2.90223785400748 | -1.59654257752051 | 0.69942493200957  |
| H | -3.34952046100640 | 0.41360186624641  | 2.17267116453608  |
| H | -4.74915598209907 | -0.54266133854171 | 1.68498609689067  |
| H | -6.25084267355601 | 0.36870584521695  | -0.24750732200248 |
| H | -5.84105644042045 | 1.95225772805817  | -0.92237421189709 |
| H | -5.33740002912483 | 1.78139942689577  | 1.52395921223061  |
| F | -3.72579612774360 | 2.35195590695927  | 0.49151732606640  |
| H | -5.08442231185141 | 0.05431016189281  | -2.38339039102715 |
| H | -3.74509379030882 | 1.05952081184806  | -1.83414071714174 |
| H | -1.21328731059645 | -0.52281032026093 | -0.71581384750920 |
| H | -1.21849226327894 | 0.19595506789508  | 0.89703375887584  |
| H | -1.94370570594159 | 1.06851896952892  | -0.44662397478445 |

## 12C\_ae, Water

|   |                   |                   |                   |
|---|-------------------|-------------------|-------------------|
| C | -5.42072085411542 | 1.03939412141430  | -0.50330225794725 |
| C | -4.50876521270148 | 0.34176502341180  | -1.50170402054934 |
| C | -4.67802850663820 | 1.35424822737338  | 0.77757506776130  |
| C | -3.96889428756671 | 0.13139354325981  | 1.32326386048437  |
| C | -3.13260045479432 | -0.61626235248757 | 0.28088267436053  |
| N | -3.95798582627851 | -0.86933381280454 | -0.90348615995846 |
| H | -3.40641393520837 | -1.36764790665910 | -1.59176303662565 |
| C | -1.80430358943177 | 0.07547866226385  | -0.02783799275015 |

|   |                   |                   |                   |
|---|-------------------|-------------------|-------------------|
| H | -2.89685640712100 | -1.59410847544251 | 0.70699231407027  |
| H | -3.34705757661059 | 0.41546699175882  | 2.17347405188432  |
| H | -4.74770451340705 | -0.53836535944216 | 1.69672311187467  |
| H | -6.25665279550138 | 0.38251687051617  | -0.25033521333712 |
| H | -5.83101047902737 | 1.95694792287325  | -0.92632392056159 |
| H | -5.35048285116503 | 1.77057821950748  | 1.52795849395045  |
| F | -3.73327587411565 | 2.36517594746449  | 0.50943147643129  |
| H | -5.07966128398098 | 0.05773315275316  | -2.38536494655727 |
| H | -3.73325857072753 | 1.04556294624293  | -1.82963401951913 |
| H | -1.22225732340001 | -0.53496788750077 | -0.72028657708924 |
| H | -1.22294394301201 | 0.20193097114636  | 0.88685231761231  |
| H | -1.95120571519659 | 1.05923318835083  | -0.47005522353430 |

## 12C\_aa, Gas Phase

|   |                   |                   |                   |
|---|-------------------|-------------------|-------------------|
| C | -5.42894364615358 | 1.05436138129497  | -0.49113401289276 |
| C | -4.53621929769466 | 0.31352372876256  | -1.48474758587554 |
| C | -4.66304213522385 | 1.36901700278805  | 0.78039016411404  |
| C | -3.97980999460223 | 0.13408791275620  | 1.34260500434209  |
| C | -3.16752176247891 | -0.64128417969018 | 0.29207363939035  |
| N | -3.93283041640292 | -0.88783161381639 | -0.93007874993489 |
| H | -4.65118023759917 | -1.57885228437452 | -0.75076773628321 |
| H | -1.83582459766144 | 0.03002952378150  | -0.03036283704724 |
| C | -2.93773375063492 | -1.62381511297842 | 0.70980293709857  |
| H | -3.35103135377908 | 0.41915565474078  | 2.18807829347926  |
| H | -4.76820554454066 | -0.51907404792932 | 1.72902602953274  |
| H | -6.28433354469183 | 0.42439096094849  | -0.22922127014060 |
| H | -5.81708941951464 | 1.97962443242674  | -0.91975176826791 |
| H | -5.32280584703503 | 1.80825149098169  | 1.53101303137778  |
| F | -3.70583479913935 | 2.34282343378844  | 0.48968639171965  |
| H | -5.10081414541625 | 0.03902884577133  | -2.37568817578252 |
| H | -3.73723687503968 | 0.97962172269742  | -1.81570506807286 |
| H | -1.28028914639212 | -0.57604852293241 | -0.74452004351411 |
| H | -1.24118207089778 | 0.13742366260432  | 0.87754104029345  |
| H | -1.97068141510190 | 1.02580600837875  | -0.44753928353628 |

## 12C\_aa, Water

|   |                   |                   |                   |
|---|-------------------|-------------------|-------------------|
| C | -5.42193653317470 | 1.05606929887545  | -0.49309732421998 |
| C | -4.53274973908008 | 0.31552997129206  | -1.48819128047167 |
| C | -4.66925779353847 | 1.36001050439660  | 0.78547460332890  |
| C | -3.97899787876377 | 0.12915645935080  | 1.33942388937885  |
| C | -3.16375298733278 | -0.64144274755014 | 0.28995117491971  |
| N | -3.93499312363242 | -0.89431482152201 | -0.93245556085035 |
| H | -4.67641804363387 | -1.55292092399939 | -1.71811106008210 |
| C | -1.83424051237137 | 0.03190009931955  | -0.03602648014957 |
| H | -2.93334889469302 | -1.62159325872763 | 0.71160980586485  |
| H | -3.35317249624196 | 0.40813538122615  | 2.18917610174111  |
| H | -4.76720621483264 | -0.52745143636236 | 1.71843108356297  |
| H | -6.27824762721791 | 0.42657595016645  | -0.23577311523994 |
| H | -5.80855659607595 | 1.98209150571850  | -0.92167018601896 |
| H | -5.33188222744056 | 1.79384900259862  | 1.53440170948072  |
| F | -3.70615884557223 | 2.35211738997425  | 0.50888071135858  |
| H | -5.10647277412794 | 0.04285576860619  | -2.37368199211657 |
| H | -3.73094964648017 | 0.97625664842591  | -1.82411714279090 |
| H | -1.25968298527817 | -0.58646396774230 | -0.72595572463469 |
| H | -1.25188327583653 | 0.16556388647938  | 0.87647916530844  |
| H | -1.97270180467544 | 1.01431528127394  | -0.48404837836938 |

## 12C\_ee, Gas Phase

|   |                   |                   |                   |
|---|-------------------|-------------------|-------------------|
| C | -5.33195958327591 | 1.08243377197532  | -0.50955044451128 |
| C | -4.46219960549647 | 0.34923898117412  | -1.53054881815853 |
| C | -4.55128681179563 | 1.38456295177670  | 0.75263186381546  |
| C | -3.93086163440634 | 0.12555816681623  | 1.32040425380806  |
| C | -3.09213398974921 | -0.56118813216163 | 0.24810407655050  |
| N | -3.91843337570435 | -0.84874625628602 | -0.91003312409386 |
| C | -3.40782053222442 | -1.39548142562750 | -1.59110133496338 |
| C | -5.26684988321172 | -0.03322106216099 | -2.75932270837937 |
| H | -3.65140094085721 | 1.03401865728309  | -1.83578329293565 |
| H | -2.23445798930952 | 0.08399705678203  | -0.00364955647031 |
| H | -2.69224959384795 | -1.49753931423019 | 0.63627851747527  |
| H | -3.31871214420639 | 0.36863242207855  | 2.18946953119499  |
| H | -4.73297867200752 | -0.54347202248998 | 1.63826498962131  |
| H | -6.18159887369803 | 0.44644219254494  | -0.24769910899684 |
| H | -5.71652680406047 | 2.00827435346398  | -0.94059331421282 |

F -5.39603958029305 1.95708062255179 1.69419861229589  
H -3.76958357348270 2.12217027960811 0.54242106191112  
H -6.09349870424081 -0.68339617017635 -2.47057875615016  
H -4.64880397762646 -0.56834657190988 -3.48231147295634  
H -5.67155373050585 0.85195149898769 -3.24964097484404

### 12C\_ee, Water

C -5.33642659023360 1.07725303117339 -0.50700673869314  
C -4.46798135030850 0.34150439194980 -1.52726958810558  
C -4.54683318847657 1.38024141577975 0.74640684784352  
C -3.93097446982505 0.12576899796141 1.32243272466690  
C -3.09513465628314 -0.56345764349946 0.24938639626637  
N -3.92462773526227 -0.86355766009450 -0.90930050471570  
H -3.37923273186653 -1.37211260842730 -1.59572850813353  
C -5.26927950325514 -0.03074669318270 -2.76103622489880  
H -3.65197222750202 1.01952233059335 -1.82560559695998  
H -2.24721012145425 0.08620992922943 -0.01461435327805  
H -2.68571951971745 -1.49388295328020 0.64083747412048  
H -3.31086686669739 0.37057950236219 2.18529531875044  
H -4.73300778009753 -0.54164939881951 1.64712824621295  
H -6.18672086783951 0.44218007616324 -0.24131155847038  
H -5.71748111240088 2.00159710886602 -0.94422091485625  
F -5.39838658487592 1.96232313466319 1.69820387204584  
H -3.77057533017802 2.12076108377203 0.53776127359511  
H -6.11510752260979 -0.66133469740107 -2.48090552465265  
H -4.65131428732309 -0.58051308315940 -3.47274265251137  
H -5.65009755379335 0.86228373535036 -3.25674998822615

### 12C\_ea, Gas Phase

C -5.35096865471396 1.08904483931469 -0.49563688733098  
C -4.49083617959779 0.32532331713958 -1.51170289910736  
C -4.55416461068419 1.39655815410709 0.75573263066699  
C -3.93206998062569 0.14471136341465 1.33751553510890  
C -3.12974510385626 -0.58786453751335 0.25842154888069  
N -3.8959977523793 -0.87416098797449 -0.94043002898981  
H -4.62251228314758 -1.55432957728050 -0.74212139450175  
C -5.27430895427336 -0.03322761185259 -2.76067535513861  
H -3.65316519093639 0.97085029038150 -1.80311367405258  
H -2.27212106167260 0.02435424008677 -0.03915325012180  
H -2.72440630384742 -1.51938428404513 0.65231071142125  
H -3.29749252212754 0.40101999494954 2.18733784467581  
H -4.73442280542436 -0.50329184623127 1.70054249725436  
H -6.21039554180283 0.46935655470852 -0.21970982658585  
H -5.73261300463113 2.01526446916292 -0.92951817445715  
F -5.38413784891807 1.98693049972621 1.70062359703033  
H -3.77127367743958 2.12716482515907 0.52585808303383  
H -6.10050017809107 -0.70363538061268 -2.51250095003933  
H -4.62919642881239 -0.53861111030596 -3.47812822175107  
H -5.69351989415985 0.85703678766542 -3.22905178569590

### 12C\_ea, Water

C -5.35142669612571 1.08237321650259 -0.49723171444898  
C -4.48811349111215 0.32223060389862 -1.51333646036845  
C -4.54779493772203 1.39169583489696 0.74595581792414  
C -3.93160909263938 0.14440147976336 1.33600401177752  
C -3.12682721267289 -0.58843953947581 0.25934439843963  
N -3.90108622278195 -0.88400509231827 -0.93742407005716  
H -4.64678160816348 -1.53472515968480 -0.70590396554158  
C -5.27336091281259 -0.02901007277854 -2.76337818168358  
H -3.64948707104771 0.96836444340990 -1.79727748886743  
H -2.27371424241076 0.02761047118429 -0.04106937951467  
H -2.72398754119605 -1.51703861461649 0.66174373194447  
H -3.29238433533196 0.40058147545586 2.18224813636035  
H -4.73272027850893 -0.50827995059789 1.69341214194137  
H -6.20500323301228 0.45452321112766 -0.22131980520467  
H -5.73232454971082 2.006404186740892 -0.93679272719879  
F -5.38688413659916 1.99087243679375 1.70017614378311  
H -3.77129071943964 2.12722673616628 0.52013905751419  
H -6.0899964477530 -0.71181466312287 -2.51780733562384  
H -4.62764491327059 -0.51492803829627 -3.49493721016114  
H -5.70141235768461 0.86542935428274 -3.21594564101448

### 13\_e, Gas Phase

C -5.52703409219049 1.02935549136378 0.40525231639111  
C -5.09226054391193 0.62713187592862 -0.99782735035010  
C -4.36121353585887 1.59883272233949 1.19322130445060  
C -3.17442862128621 0.64976219680509 1.18327101398434  
C -2.80843530200452 0.24918507704816 -0.23781117391529  
N -3.97849214341395 -0.28297318541305 -0.90533980897708  
C -3.96256040627514 -1.56643331300976 -1.38208004632726  
O -2.99475353396394 -2.27865447153557 -1.23912911188474  
C -5.18919877979375 -2.07318791570765 -2.10414562487040  
H -5.41080973931148 -1.47016902335766 -2.98406533457541  
H -6.06614203949495 -2.07392047429332 -1.45750207581451  
H -4.97213258636211 -3.09094293872800 -2.41232039691733  
H -5.92143748908641 0.17021621494739 -1.52793308626828  
H -4.79648258271537 1.5307492329444 -1.54245215355834  
H -2.44739440184741 1.13655624280439 -0.76865453446590  
H -2.03066140489766 -0.50798571683782 -0.24204823946252  
F -6.52125174338349 1.98289506145162 0.30337024765188  
H -5.95409610519252 0.15950543154230 0.91297576488373  
H -4.66523659422655 1.81909192254464 2.21597412627653  
H -4.05246299236831 2.53455858142519 0.71918541831878  
H -3.38211483550677 -0.24831118038429 1.77124471686002  
F -2.09057052690819 1.2820780777200 1.76120402857017

### 13\_e, Chloroform

C -5.52282984552047 1.02012545051187 0.40126571262455  
C -5.08883977888821 0.62257322596808 -1.00228229933477  
C -4.36343656060444 1.59727963005114 1.19150293920867  
C -3.18176595193195 0.64509807922527 1.18197227130908  
C -2.80578464187329 0.25161357693107 -0.23783972822361  
N -3.97240689854711 -0.28989019580479 -0.90654978125671  
C -3.96261466288359 -1.56117337616102 -1.38492012570666  
O -2.98452821778017 -2.27986256949468 -1.25423723187332  
C -5.19202858867347 -2.06718916382280 -2.09438584628240  
H -5.41847865872774 -1.45900652198265 -2.96930408988236  
H -6.06064197369663 -2.05922070259309 -1.43697697036145  
H -4.98848628992017 -3.08638563279851 -2.40745274575870  
H -5.91608659276928 0.16602240918895 -1.53417985527368  
H -4.78335698564668 1.52270757578923 -1.54499539935622  
H -2.45810083467505 1.14222127869564 -0.77035401429570  
H -2.01801480653667 -0.49413212669720 -0.23681573071867  
F -6.52074095412114 1.98038417812304 0.29390121206664  
H -5.95599542307374 0.15601829644106 0.90995537602575  
H -4.67126396374061 1.81138301806786 2.21439149766172  
H -4.05424969764085 2.53139987712075 0.71444725985771  
H -3.38894867024175 -0.25022533568002 1.77159368265084  
F -2.09057000250702 1.27760002712080 1.76565386691929

### 13\_e, DMSO

C -5.52196903678386 1.01857802630263 0.40115098668968  
C -5.08892671973740 0.61984786975871 -1.00206531033637  
C -4.36363242657411 1.59791416548546 1.19104853116094  
C -3.18419718921990 0.64408118265133 1.18243840112619  
C -2.80583723680790 0.25127495573641 -0.23678479576210  
N -3.97177272252128 -0.29355130546140 -0.90474000204558  
C -3.96174110069563 -1.55939632802843 -1.38776029802674  
O -2.97812010459868 -2.27828149679433 -1.26556500022407  
C -5.19211331039448 -2.06583312631640 -2.09248451663211  
H -5.41928072649977 -1.45721682022454 -2.96694660087287  
H -6.05886049325226 -2.05363622721185 -1.43287151458779  
H -4.99304960456683 -3.08594318170637 -2.40566899801533  
H -5.91590973443410 0.16287659336162 -1.53356191890589  
H -4.78046329815635 1.51788428128997 -1.54589232013096  
H -2.46204904349947 1.1422420899271 -0.77074540066100  
H -2.01531380170727 -0.49124280856507 -0.23384433926056  
F -6.51943505393125 1.98196167178798 0.29096747209115  
H -5.0676886361241 0.15738975270996 0.911575752104179  
H -4.67232173684126 1.81131590548963 2.21381727232472  
H -4.05391651111784 2.53087492815128 0.71205570916864  
H -3.39241707893716 -0.24978012980330 1.77320871825599  
F -2.09015443611083 1.27597987739901 1.76706341224226

### 13\_a, Gas Phase

|   |                   |                   |                   |
|---|-------------------|-------------------|-------------------|
| C | -5.48723039641856 | 1.09621703137242  | 0.35206539847604  |
| C | -5.04271012007656 | 0.71201438985221  | -1.05100151610493 |
| C | -4.31380408259333 | 1.55374478184615  | 1.20631821111964  |
| C | -3.12406678571702 | 0.60965147861424  | 1.14092442101734  |
| C | -2.78166253510450 | 0.26037082732604  | -0.29823606733899 |
| N | -3.94313524399220 | -0.22469697315158 | -0.99495468402557 |
| C | -4.17966301255361 | -1.54390717431803 | -1.28562300602054 |
| O | -5.22403015279696 | -1.89936215982468 | -1.78023929232725 |
| C | -3.08389072456078 | -2.53766344971623 | -0.98619616124067 |
| H | -2.18254424743702 | -2.32243645428998 | -1.55983240952498 |
| H | -3.46175115211308 | -3.51528530885700 | -1.26642331572387 |
| H | -2.83434619996252 | -2.53256793055064 | 0.07401540740986  |
| H | -5.86384840496360 | 0.24807435078333  | -1.58977926985903 |
| H | -4.73155543740896 | 1.61599877441668  | -1.58563357491934 |
| H | -2.41105672958975 | 1.16210048961821  | -0.79911453227833 |
| H | -1.98664554334344 | 0.47806457380826  | -0.32011474270906 |
| H | -6.23828054603825 | -1.87769317430616 | 0.29265817268203  |
| F | -6.08714535957087 | 0.00393727881789  | 0.94652927715211  |
| H | -4.63301111617705 | 1.68296801129073  | 2.23988068944045  |
| H | -3.98529678766753 | 2.52933227921842  | 0.83571454039329  |
| F | -3.41106077769828 | -0.56479441068677 | 1.81496243510682  |
| H | -2.25709464421608 | 1.05884556774069  | 1.62996001927499  |

### 13\_a, Chloroform

|   |                   |                   |                   |
|---|-------------------|-------------------|-------------------|
| C | -5.48544544698375 | 1.11121240980533  | 0.34615207371743  |
| C | -5.0425521014306  | 0.71243910145350  | -1.05051327890712 |
| C | -4.31414642651423 | 1.55663999265763  | 1.20424117382757  |
| C | -3.12915056297972 | 0.61038171441667  | 1.13981749620937  |
| C | -2.78477629965872 | 0.24989724495902  | -0.29395143193540 |
| N | -3.95634987746436 | -0.24332518083007 | -0.97899542994757 |
| C | -4.18263869352537 | -1.55056187213966 | -1.26200769749597 |
| O | -5.24536588921576 | -1.92467475535287 | -1.73358021129346 |
| C | -3.07257692772227 | -2.53471685075737 | -0.99867078530059 |
| H | -2.18234888024718 | -2.28753943463576 | -1.57592402498215 |
| H | -3.43175427989606 | -3.51608222915909 | -1.29085544985158 |
| H | -2.80634874853715 | -2.54408337422067 | 0.05733182601119  |
| H | -5.87057496193273 | 0.27199529539375  | -1.59620539886597 |
| H | -4.70490161431229 | 1.60734148666708  | -1.58049184295911 |
| H | -2.42543463323457 | 1.14892191379267  | -0.80295596368048 |
| H | -1.98733348225821 | -0.48475540855275 | -0.31474384561158 |
| H | -6.23260397589832 | 1.903029219668817 | 0.28309663303975  |
| F | -6.10341119055571 | 0.01382878079247  | 0.94238241154771  |
| H | -4.63389561404567 | 1.6922797244301   | 2.23690597217721  |
| H | -3.98006820721133 | 2.52922591455371  | 0.83313162781643  |
| F | -3.4308906706716  | -0.56915927331876 | 1.82042850918172  |
| H | -2.26125847059811 | 1.04988033234399  | 1.63128763730263  |

### 13\_a, DMSO

|   |                   |                   |                   |
|---|-------------------|-------------------|-------------------|
| C | -5.48475473370795 | 1.11706191380792  | 0.34432301110334  |
| C | -5.04304600567259 | 0.71190460710204  | -1.04993936233232 |
| C | -4.31381517490316 | 1.55762687132464  | 1.20363080482410  |
| C | -3.13121054312712 | 0.60971651386231  | 1.13954666663387  |
| C | -2.78603629701167 | 0.24686036880755  | -0.29268279669226 |
| N | -3.96101977567689 | -0.24948892068040 | -0.97326094043457 |
| C | -4.18327335582119 | -1.55277356098911 | -1.25440055075803 |
| O | -5.25161075685763 | -1.93394702117231 | -1.71864828863287 |
| C | -3.06830838898470 | -2.53337674518343 | -1.00270297021704 |
| H | -2.18158989798629 | -2.27567413522238 | -1.58054361579482 |
| H | -3.42092216665633 | -3.51582001697182 | -1.29959317272644 |
| H | -2.79636151624846 | -2.54779417942856 | 0.05175838666157  |
| H | -5.87312462562798 | 0.27758164755174  | -1.59679854634699 |
| H | -4.69754312745592 | 1.60326366561726  | -1.57972059486633 |
| H | -2.43104977902428 | 1.14548531079788  | -0.80400080608182 |
| H | -1.98735148187762 | -0.48605183079302 | -0.31391408257711 |
| H | -6.22930210957885 | 1.91035904754238  | 0.27929897137937  |
| F | -6.11057656853267 | 0.01949368461459  | 0.94191948708815  |
| H | -4.63372882366725 | 1.69607830109215  | 2.23590480616827  |
| H | -3.97692008954864 | 2.52889605121507  | 0.83229250946334  |
| F | -3.43942004206858 | -0.5720836087300  | 1.82069978815261  |
| H | -2.26286473996417 | 1.04485378797848  | 1.63271129598599  |

### 14\_a, Gas Phase

|   |                   |                   |                   |
|---|-------------------|-------------------|-------------------|
| C | -5.59058644526492 | 1.15956992338351  | 0.07159048110107  |
| C | -4.67137902078739 | 0.93331765375704  | -1.11586528920859 |
| C | -4.79527377986688 | 1.40613022189840  | 1.34330512979352  |
| C | -3.69853477919098 | 0.37709537654197  | 1.56089573008196  |
| C | -2.88309293753663 | 0.14957639124633  | 0.29412501876972  |
| N | -3.73186488950946 | -0.13229009203769 | -0.83328834434016 |
| C | -3.85041781210439 | -1.29851651824306 | -1.55018076602118 |
| O | -4.65987288269030 | -1.35812483285288 | -2.45034977468956 |
| C | -2.94990289181359 | -2.51579174748094 | -1.27014092720254 |
| C | -1.50236557347328 | -2.19515311647928 | -1.65887602909536 |
| C | -3.44269427786374 | -3.64027717779768 | -1.3235512113254  |
| C | -3.06715500959852 | -3.03179738482594 | 0.17024979428441  |
| H | -5.24803634223704 | 0.66299538688692  | -1.99386935456656 |
| H | -4.12475186199884 | 1.8612525062101   | -1.32051806988406 |
| H | -2.31533158603585 | 1.06711687054189  | 0.09180810006844  |
| H | -2.16708873643387 | -0.64325930030452 | 0.45568158947878  |
| H | -6.24773813043777 | 2.00820299137294  | -1.23235512113254 |
| F | -6.39348970964445 | 0.04775029447512  | 0.23501356852296  |
| H | -5.45947603212692 | 1.42770415057163  | 2.20661059200612  |
| H | -4.32485638115175 | 2.39004365203999  | 1.25958984864365  |
| F | -4.25936761251216 | -0.82131673386688 | 1.96149257084461  |
| H | -3.03123036856369 | 0.70222008788647  | 2.36241947843804  |
| H | -4.10965637719727 | -3.05219108090422 | 0.48820124545948  |
| H | -2.51431296264571 | -2.45286906641520 | 0.90408995161647  |
| H | -2.68146397603158 | -4.05144916358340 | 0.20455814612719  |
| H | -3.41761593832777 | -3.34114583585600 | -3.23225446709871 |
| H | -4.47028273143108 | -3.91068213809539 | -1.94760651426597 |
| H | -2.80748091882701 | -4.51601017850613 | -2.04937489817820 |
| H | -1.45184408918683 | -1.91227188530560 | -2.71157777148563 |
| H | -0.88782691093216 | -3.08625984657043 | -1.52078535718643 |
| H | -1.06092903457811 | -1.38975940809798 | -1.07390793554580 |

### 14\_a, Chloroform

|   |                    |                   |                   |
|---|--------------------|-------------------|-------------------|
| C | -5.57242262571252  | 1.19449595987565  | 0.05243500824526  |
| C | -4.64929196531326  | 0.94519815070515  | -1.12435740685732 |
| C | -4.78822443710809  | 1.41567934674377  | 1.33225631605013  |
| C | -3.70916482103125  | 0.37227530299450  | 1.55233347980214  |
| C | -2.88229862326083  | 0.13665540490642  | 0.29708972377802  |
| N | -3.73453711924033  | -0.14460811195166 | -0.83481457817275 |
| C | -3.89399269149669  | -1.32150871852651 | -1.50177860996582 |
| O | -4.76578560162437  | -1.41308797398017 | -2.35274444347092 |
| C | -2.96161154862207  | -2.52188794534348 | -1.26009316979553 |
| C | -1.592617781430352 | -2.16064555545789 | -1.65961821085784 |
| C | -3.43231269669914  | -3.64827905808280 | -2.18592080585339 |
| C | -3.04809630195388  | -3.06288361365067 | 0.17363273463156  |
| H | -5.22379291966696  | 0.70411102791032  | -2.01082413790729 |
| H | -4.07282045506768  | 1.85626796753159  | -1.31093159569623 |
| H | -2.31340284150429  | 1.04970067615172  | 0.09225306652892  |
| H | -2.17090259947463  | -0.65720707650762 | 0.46809866710260  |
| H | -6.21108883442215  | 2.05329226348342  | -0.15696469624340 |
| F | -6.40952383643317  | 0.09102637564560  | 0.20247157065716  |
| H | -5.45924439563549  | 1.44800927447129  | 2.19002889771887  |
| H | -4.30060991251132  | 2.39103205421946  | 1.25717711769203  |
| F | -4.30113393769563  | -0.83018335889589 | 1.93125913088186  |
| H | -3.04949478979032  | 0.67266012158199  | 2.36687506948743  |
| H | -4.08922844599265  | -3.15966922800981 | 0.48374822453037  |
| H | -2.53786999473818  | -2.45465972023815 | 0.91391466884858  |
| H | -2.59394896556872  | -4.05445300071357 | 0.19398845443220  |
| H | -3.41726492012801  | -3.33965160453761 | -3.22928584775794 |
| H | -4.44845515714630  | -3.95510440547246 | -1.94034556188499 |
| H | -2.76974999786506  | -4.50537024621526 | -2.06168235020367 |
| H | -1.49505463468191  | -1.85384014621123 | -2.70666009469759 |
| H | -0.89367703767939  | -3.04288169839281 | -1.54843829567751 |
| H | -1.09474007763212  | -1.36060946403330 | -1.06153832534491 |

### 14\_a, DMSO

|   |                   |                   |                   |
|---|-------------------|-------------------|-------------------|
| C | -5.56601481712195 | 1.20602276777555  | 0.04464401114047  |
| C | -4.64077311802943 | 0.94871560073356  | -1.12769667261819 |
| C | -4.78650980607527 | 1.41816113963138  | 1.32775917249015  |
| C | -3.71339291237522 | 0.37013142574938  | 1.54914397937621  |
| C | -2.88144735019794 | 0.13277941981808  | 0.29839904578917  |
| N | -3.73475219030437 | -0.14880822742065 | -0.83493946612262 |
| C | -3.90891812212021 | -1.32952680709310 | -1.48305771639171 |

|   |                   |                   |                   |
|---|-------------------|-------------------|-------------------|
| O | -4.80383626915902 | -1.43286452862940 | -2.31342124993888 |
| C | -2.96561841797354 | -2.52388220684914 | -1.25614647943347 |
| C | -1.53474478894396 | -2.14908947271964 | -1.65992207230084 |
| C | -3.42979838136758 | -3.64981037861932 | -2.18563910185249 |
| C | -3.04034455374889 | -3.07353986683311 | 0.17509214231314  |
| H | -5.21263207722768 | 0.71712880022958  | -2.01807646130189 |
| H | -4.05417126802982 | 1.85389293082568  | -1.30766007515884 |
| H | -2.31237812325714 | 1.04462994342293  | 0.09323151066529  |
| H | -2.17143931483395 | 0.71712880022958  | 0.47285556147022  |
| H | -6.19774728091618 | 2.06868266022018  | -0.16670050022937 |
| F | -6.41550346656760 | 0.10596095765739  | 0.18898530005228  |
| H | -5.46024895945336 | 1.45403693556537  | 2.18328677999901  |
| H | -4.29326170513554 | 2.39065958659642  | 1.25621378490749  |
| F | -4.31595732946651 | -0.83391517136034 | 1.91909227024122  |
| H | -3.05724502906568 | 0.66199239189394  | 2.36879817983264  |
| H | -4.07943033639951 | -3.19424498558786 | 0.48446157186442  |
| H | -2.54254674793916 | -2.45719420338900 | 0.91693187633271  |
| H | -2.56510828320511 | -4.05529091142773 | 0.19010283368411  |
| H | -3.41963320388706 | -3.33656577471777 | -3.22797976874250 |
| H | -4.44147817639460 | -3.96920712984074 | -1.93745761146384 |
| H | -2.75801042455597 | -4.50052395763964 | -2.06795225272201 |
| H | -1.51092952558050 | -1.83330954874448 | -2.70455848465783 |
| H | -0.89635177321565 | -3.02826764007394 | -1.55905213364905 |
| H | -1.10569624745156 | -1.35168646498095 | -1.05717797357498 |

### 14\_e, Gas Phase

|   |                   |                   |                    |
|---|-------------------|-------------------|--------------------|
| C | -5.42637897504943 | 0.57037204429924  | 0.92313335933030   |
| C | -5.40662458602652 | 0.59649742942250  | -0.60165473097382  |
| C | -4.20836565825466 | 1.26590036984110  | 1.50506931665498   |
| C | -2.92379259421523 | 0.73141510784467  | 0.89341216586333   |
| C | -3.00008562896183 | 0.76760831481603  | -0.62458898714571  |
| N | -4.16660883386424 | 0.02615650302644  | -1.07294531197108  |
| C | -3.96265134098476 | -1.23384250611207 | -1.58856970265013  |
| O | -2.83786616141506 | -1.68484996106224 | -1.62157745974133  |
| C | -5.12284039381334 | -2.05170223752976 | -2.18504675128365  |
| C | -5.86761990473597 | -1.25768251400610 | -3.26316166300794  |
| C | -6.05786421430940 | -2.57581954994861 | -1.08725039429039  |
| C | -4.50137549799863 | -3.27557333650262 | -2.86714173706989  |
| H | -6.26481906187315 | 0.06557227925876  | -0.98871010135861  |
| H | -5.47702933503585 | 1.63686442788197  | -0.93452918982154  |
| H | -3.09552110905663 | 1.80838477271876  | -0.947388987987417 |
| H | -2.10939441046316 | 0.33245098293144  | -1.06391634284986  |
| F | -6.57118675273890 | 1.21026206904182  | 1.36000893994275   |
| H | -5.48082374542433 | -0.46909859785056 | 1.26164853454006   |
| H | -4.19074954179904 | 1.15997113739957  | 2.58936555939795   |
| H | -4.27720853697341 | 0.233110064273786 | 1.26768273056050   |
| H | -2.71985138261704 | -2.29251263784891 | 1.21829342766357   |
| F | -1.86832236238507 | 1.51947008520370  | 1.31207292938794   |
| H | -6.61720331766790 | -1.90146057741200 | -3.72596417765186  |
| H | -5.17104677383588 | -0.94545724007576 | -4.04271021738304  |
| H | -6.37454947044838 | -0.36946859060440 | -2.89455630701998  |
| H | -6.76325170209233 | -3.27951270746225 | -1.53207436304030  |
| H | -6.63886577811810 | -1.80504838471812 | -0.58571481494359  |
| H | -5.48375820185569 | -3.11663055945162 | -0.33282124757361  |
| H | -5.29458943203666 | -3.87110891003824 | -3.32137724059314  |
| H | -3.96107735965928 | -3.89396829811195 | -2.15329402080852  |
| H | -3.79697793629015 | -2.97907455768865 | -3.64236321338923  |

### 14\_e, Chloroform

|   |                   |                   |                   |
|---|-------------------|-------------------|-------------------|
| C | -5.43218014777942 | 0.58451370015283  | 0.92362405067375  |
| C | -5.39230006854059 | 0.57120228239015  | -0.59964212576939 |
| C | -4.22704794218037 | 1.29842231303107  | 1.50741929408191  |
| C | -2.94032970579456 | 0.73699405140473  | 0.93110356101543  |
| C | -2.98589523045360 | 0.73620811415234  | -0.58785509126864 |
| N | -4.14516099322652 | -0.02081961810417 | -1.03188564352223 |
| C | -3.94497226165750 | -1.23255180256956 | -1.63042082327847 |
| O | -2.8070601973660  | 1.65740849490886  | -1.74959787469970 |
| C | -5.11565728585496 | -2.05290069071177 | -2.19754341935137 |
| C | -5.88449066486231 | -1.25448631874466 | -3.25715040639999 |
| C | -6.02397237805345 | -2.57914597736259 | -1.07815677016058 |
| C | -4.51840140704742 | -3.27680404634115 | -2.90048214429792 |
| H | -6.24735488247563 | 0.03574761477142  | -0.98426919737427 |
| H | -5.44593453846136 | 1.60154790450933  | -0.96359831668033 |
| H | -3.07990366896508 | 1.76723844429435  | -0.93976026600247 |
| H | -2.08609181927513 | 0.29523890128360  | -1.00020731729100 |

|   |                   |                   |                   |
|---|-------------------|-------------------|-------------------|
| F | -6.58721989202458 | 1.24582432532888  | 1.32244790221663  |
| H | -5.50039577089820 | -0.44076868103693 | 1.29598595515980  |
| H | -4.22752399888639 | 1.21863568060052  | 2.59394012432629  |
| H | -4.28889504334299 | 2.35500577314632  | 1.23257807786831  |
| H | -2.74590629458377 | -0.27424784308223 | 1.29514448119493  |
| F | -1.87887496622784 | 1.53409040382950  | 1.34395562712518  |
| H | -6.64666404658611 | -1.89850608478839 | -3.69850391207716 |
| H | -5.20573415892968 | -0.94507080932898 | -4.05376996103651 |
| H | -6.38022215856390 | -0.36602271115579 | -2.87499285250035 |
| H | -6.73870532645746 | -3.28069985192741 | -1.51114939998571 |
| H | -6.59348346766728 | -1.81004547275585 | -0.56242672358955 |
| H | -5.43252391344136 | -3.12048329638369 | -0.33751346963379 |
| H | -5.33019410787536 | -3.86645267150527 | -3.32832874520324 |
| H | -3.96300484307720 | -3.90274838858489 | -2.20399037185024 |
| H | -3.84225299707337 | -2.98232674960284 | -3.70162424168933 |

### 14\_e, DMSO

|   |                   |                   |                    |
|---|-------------------|-------------------|--------------------|
| C | -5.43370115470315 | 0.59081900099285  | 0.92453543575242   |
| C | -5.38824438383016 | 0.56234369097348  | -0.59803838153081  |
| C | -4.23224947178264 | 1.31131374172393  | 1.50710072667253   |
| C | -2.94561253835451 | 0.73966519373092  | 0.94301326620839   |
| C | -2.98184839483081 | 0.72453539033492  | -0.57594155562357  |
| N | -4.13921397475622 | -0.03694420914338 | -1.01845853041708  |
| C | -3.94098854849493 | -1.23337894095033 | -1.64058226916562  |
| O | -2.79981794145241 | -1.65061800984790 | -1.78368592057622  |
| C | -5.11367801720281 | -2.05388757718217 | -2.20151113733480  |
| C | -5.88975753646575 | -1.25258299409446 | -3.25415918453010  |
| C | -6.01379902203514 | -2.58308590352142 | -1.07691206290454  |
| C | -4.52287247276087 | -3.27612394176268 | -2.91262894728744  |
| H | -6.24283089835635 | 0.02457592612308  | -0.97970766040865  |
| H | -5.43683356619261 | 1.58856242375966  | -0.97366852281735  |
| H | -3.07408920468889 | 1.75180114668117  | -0.93887265174440  |
| H | -2.07921588884662 | 0.28044225196251  | -0.978066250496664 |
| F | -6.59130258703235 | 1.25893463729292  | 1.31067937126166   |
| H | -5.50589073513944 | -0.42929585579989 | 1.30894071648435   |
| H | -4.23846122072196 | 1.24190685337116  | 2.59426376064703   |
| H | -4.29147840425060 | 2.36442301229045  | 1.21866173426847   |
| H | -2.75504417775628 | -0.26701813937626 | 1.32024894380409   |
| F | -1.88132038576810 | 1.53925063773060  | 1.35172324746814   |
| H | -6.65420938832726 | -1.89665847870773 | -3.69139383281636  |
| H | -5.21638107701798 | -0.94059652679894 | -0.05445380775744  |
| H | -6.38375014480697 | -0.36589551301052 | -2.86610489805140  |
| H | -6.73321346094667 | -3.28107820325577 | -1.50782711249020  |
| H | -6.57734086994568 | -1.8148192939327  | -0.55394194281282  |
| H | -5.41730218515722 | -3.12792649912827 | -0.34290810942275  |
| H | -5.33958936405396 | -3.86429771508220 | -3.33285551053170  |
| H | -3.96196953625278 | -3.90470340708863 | -2.22264322867133  |
| H | -3.85629344806890 | -2.98048269444381 | -3.72151547128229  |

### 15\_e, Gas Phase

|   |                   |                   |                   |
|---|-------------------|-------------------|-------------------|
| C | -5.14799601480612 | 1.78425389676159  | 0.75578229175338  |
| C | -4.92265546624293 | 1.09047421794244  | -0.58063333102458 |
| C | -3.83470627055468 | 2.16610588201696  | 1.41244871226651  |
| C | -2.92411823406077 | 0.95785505354798  | 1.52449071681901  |
| C | -2.74283448005669 | 0.28104653795045  | 0.17588259016800  |
| N | -4.03797179566092 | -0.03801716904653 | -0.38981787016068 |
| C | -4.16985327403127 | -1.23224847833475 | -1.05235215454510 |
| O | -3.32779268003211 | -2.09437616373918 | -1.02623439273816 |
| C | -5.64037005933267 | -2.48611150008073 | -2.51566768458136 |
| C | -7.01049193559678 | -2.14826824446017 | -3.08186094194878 |
| C | -5.71994379461762 | -3.73777379167913 | -1.65495894139755 |
| C | -4.62728123296658 | -2.63147181906977 | -3.64171860922006 |
| H | -5.86765033376104 | 0.75314478495274  | -0.99097892686323 |
| H | -4.47850326620638 | 1.81666214098256  | -1.27324876339360 |
| H | -2.19496268182305 | 0.96704752963619  | -0.48236352759664 |
| H | -2.16894230669341 | -0.63421841092400 | 0.27719104622135  |
| F | -5.89311186708619 | 2.92654604225409  | 0.53115238146420  |
| H | -5.73417996616349 | 1.13257028041456  | 1.40893373062863  |
| H | -4.01152812120037 | 2.60499417238868  | 2.39398384258005  |
| H | -3.33864909607457 | 2.91340469082538  | 0.78706043814154  |
| H | -3.31579899759848 | 0.23695043928030  | 2.24676737847739  |
| F | -1.68384215248633 | 1.36654546643418  | 1.97712826861885  |
| H | -7.35366415844066 | -2.95884670287788 | -3.72392300777364 |
| H | -6.96375730067597 | -1.23236811708222 | -3.67056674207869 |
| H | -7.73213882120105 | -2.01132871960760 | -2.27685842786509 |



|   |                   |                   |                   |
|---|-------------------|-------------------|-------------------|
| H | -6.10145077140943 | -4.55957478996391 | -2.26216210636315 |
| H | -6.40837769096757 | -3.58048403691986 | -0.82403854508991 |
| H | -4.74414470866800 | -4.01235385960217 | -1.26467712283694 |
| H | -4.96726995303128 | -3.40903210774845 | -4.32648210114355 |
| H | -3.64715379348831 | -2.90396198506548 | -3.26031799761588 |
| H | -4.54909881422133 | -1.69739523068629 | -4.19931220258921 |
| O | -5.32982996084390 | -1.32116000849995 | -1.70407570031312 |

### 15\_a, Gas Phase

|   |                   |                   |                   |
|---|-------------------|-------------------|-------------------|
| C | -5.71651007623119 | 1.06605061363484  | 0.44324547035441  |
| C | -5.22182553057889 | 1.09680207748727  | -0.99602050888137 |
| C | -4.66152128642139 | 1.59182527532806  | 1.40559730119452  |
| C | -3.29027384974914 | 0.97073015208148  | 1.18591271252669  |
| C | -2.90304110974324 | 0.98610027857964  | -0.28416695937348 |
| N | -3.94944739719963 | 0.41970797975013  | -1.10261496172707 |
| C | -3.97406784344504 | -0.90384666259404 | -1.46577439863474 |
| O | -4.93727221959025 | -1.43434185906683 | -1.95578324082323 |
| C | -2.72030502811723 | -2.93957548544846 | -1.14401613068460 |
| C | -1.28691153112217 | -3.16037358340969 | -0.68879448529343 |
| C | -2.96198671320346 | -3.59524428797463 | -2.49431076036085 |
| C | -3.69693807042844 | -3.42496380704839 | -3.42496380704839 |
| H | -5.93698970762439 | 0.60622453358433  | -1.64943664183108 |
| H | -5.10665954317911 | 2.13817570853449  | -1.31198458126236 |
| H | -2.74359240507901 | 2.02481039454070  | -0.59184787830896 |
| H | -1.97891616724546 | 0.43910353983591  | -0.43488408985041 |
| H | -6.63371756518259 | 1.65301196291799  | 0.53161383840785  |
| F | -6.02899800409439 | -0.23800793068445 | -0.77817882711669 |
| H | -4.98246489576176 | 1.42994818719444  | 2.43424698506023  |
| H | -4.57048379795413 | 2.67109182434400  | 1.25207012975522  |
| F | -3.29559790656623 | -0.34140768398420 | 1.6287075066901   |
| H | -2.53718991094000 | 1.50343039675523  | 1.77100627937825  |
| H | -4.72696703103658 | -3.29083647952557 | -0.40482299800652 |
| H | -3.54306504374383 | -2.87027946576560 | 0.84327894583782  |
| H | -3.52359688771925 | -4.48378193815388 | 0.10966759113931  |
| H | -2.29379040250485 | -3.16993076291031 | -3.24383983837330 |
| H | -3.99016374751574 | -3.45725526374984 | -2.81630320261606 |
| H | -2.75312986903021 | -4.66272538631309 | -2.41300155397439 |
| H | -0.59023062326669 | -2.77144540972922 | -1.43166498453848 |
| H | -1.09846372829483 | -4.22482345550180 | -0.55443850250365 |
| H | -1.11298153680073 | -2.64888447560468 | 0.25814182231108  |
| O | -2.80013057063013 | -1.49607912744384 | -1.24720002607160 |

### 15\_e, Chloroform

|   |                   |                   |                   |
|---|-------------------|-------------------|-------------------|
| C | -5.14842729985777 | 1.77241958952297  | 0.75191822743740  |
| C | -4.91828206203577 | 1.08404423294679  | -0.58537992094636 |
| C | -3.84121109664693 | 2.16979587575171  | 1.40843246191223  |
| C | -2.93242618601731 | 0.96285332169476  | 1.52548138031107  |
| C | -2.73552845782805 | 0.28791157408430  | 0.17883115699950  |
| N | -4.02618580238959 | -0.04156453568455 | -0.39358803392084 |
| C | -4.15942787379301 | -1.23358715784948 | -1.04690470199182 |
| O | -3.31412195179806 | -2.10153101211814 | -1.01668437655057 |
| C | -5.63761751803173 | -2.48991326577644 | -2.51486679387642 |
| C | -7.00747352900120 | -2.13696073357752 | -3.07200290903837 |
| C | -5.72478213983126 | -3.74378660510751 | -1.65950311800908 |
| C | -4.63160143956537 | -2.63323435425010 | -3.64637845929930 |
| H | -5.86209449131980 | 0.74303050781808  | -0.99470010129974 |
| H | -4.47156048709371 | 1.80858729411372  | -1.27636457583748 |
| H | -2.19440471237027 | 0.97731452080147  | -0.47995902902894 |
| H | -2.15389699509344 | -0.62065446008427 | 0.29098293472488  |
| F | -5.90362533997124 | 2.91621588647326  | 0.52017521093126  |
| H | -5.73493825657206 | 1.12409430552468  | 1.40566802727853  |
| H | -4.02470966096583 | 2.60642109819457  | 2.38969513885013  |
| H | -3.34741376630570 | 2.91405105766424  | 0.77754375782452  |
| H | -3.32072980120105 | 0.24418546127430  | 2.24964640999601  |
| F | -1.68729680247634 | 1.37757147617100  | 1.98423599419335  |
| H | -7.35778534467363 | -2.94143768637353 | -3.71782340092658 |
| H | -6.95525263492080 | -1.21744181695327 | -3.65499916713689 |
| H | -7.72430223309080 | -2.00118916427308 | -2.26212933824110 |
| H | -6.12542261264694 | -4.55513189064080 | -2.26828699887989 |
| H | -6.40139734288789 | -3.58061985580568 | -0.81987177668663 |
| H | -4.74902761754851 | -4.03745615633379 | -1.28288771169985 |
| H | -4.98462642772734 | -3.40123025658370 | -4.33523385885139 |
| H | -3.65190459574006 | -2.92087204822866 | -3.27468451788956 |
| H | -4.54749478070426 | -1.69430813677744 | -4.19503133079170 |
| O | -5.31510073989421 | -1.32896706561787 | -1.69676687955276 |

### 15\_a, Chloroform

|   |                   |                   |                    |
|---|-------------------|-------------------|--------------------|
| C | -5.73127007747186 | 1.11728706749896  | 0.42129072130123   |
| C | -5.20869114455871 | 1.11600988117461  | -1.00550415308961  |
| C | -4.68450616809518 | 1.61855101041600  | 1.40115110513465   |
| C | -3.32376353003725 | 0.97150480467455  | 1.21020498536079   |
| C | -2.90574725540431 | 0.96620714475426  | -0.24934308678195  |
| C | -3.95201606641528 | 0.40041640576850  | -1.07542191762106  |
| N | -3.98065899867513 | -0.91160674935222 | -1.44037121592450  |
| O | -4.95155052165813 | -1.44705539256439 | -1.92908496146477  |
| C | -2.71108880729230 | -2.95366798368774 | -1.15075418496012  |
| C | -1.26410391500199 | -3.16276791094711 | -0.73516542999420  |
| C | -2.97843353563427 | -3.60887407834099 | -2.49618796005711  |
| C | -3.65313463336964 | -3.45048938164445 | -0.06486731008990  |
| H | -5.92727855684350 | 0.64918924301868  | -1.67126409322869  |
| H | -5.05112978056859 | 2.14950057736992  | -1.32336846641951  |
| H | -2.73345079247501 | 1.99849950832739  | -0.56510550656577  |
| H | -1.98475631664223 | 0.40912515276230  | -0.37682148201113  |
| H | -6.63498753536182 | 1.72417846817974  | 0.48559733984143   |
| F | -6.08925484741852 | -0.18657278491123 | 0.75984605723796   |
| H | -5.02882245179113 | 1.47445328231141  | 2.42495197303630   |
| H | -4.56640265008665 | 2.69358552062952  | 1.24200935111942   |
| F | -3.36905409236949 | -0.34915051830623 | 1.65698308130628   |
| H | -2.57099338371854 | 1.48441691809251  | 1.80950205069591   |
| H | -4.69350336255661 | -3.31687795344030 | -0.35307473867947  |
| H | -3.46896526254360 | -2.90449491089795 | 0.86090799695368   |
| H | -3.47171248885959 | -4.51063354093040 | 0.11121501358828   |
| H | -2.34665096627871 | -3.16036919090074 | -3.26389310536247  |
| H | -4.01995448699638 | -3.50343736500997 | -2.78588856758198  |
| H | -2.73428932444090 | -4.66948014375382 | -2.426288852449068 |
| H | -0.59134241725016 | -2.77077931064749 | -1.49849318885576  |
| H | -1.06607511634464 | -4.22595603564486 | -0.60510695389976  |
| H | -1.06669169504969 | -2.64852325330696 | 0.20582419009707   |
| O | -2.80694981879016 | -1.50897848069150 | -1.24550897450467  |

### 15\_e, DMSO

|   |                   |                   |                   |
|---|-------------------|-------------------|-------------------|
| C | -5.14924070424420 | 1.76767031758633  | 0.74984137064095  |
| C | -4.91569965312490 | 1.08340348392266  | -0.58874989383266 |
| C | -3.84470195125116 | 2.16915458045861  | 1.40850643629482  |
| C | -2.93549155690365 | 0.96317085167330  | 1.52565177730149  |
| C | -2.73207265646996 | 0.29195090873309  | 0.17825109244631  |
| N | -4.02035734330089 | -0.04055053873737 | -0.39803798005120 |
| C | -4.15465269395582 | -1.23284860530096 | -1.04640978077667 |
| O | -3.30799501895158 | -2.10266721191020 | -1.01400168988960 |
| C | -5.63655049425283 | -2.49099915740349 | -2.51397355708436 |
| C | -7.00624095510195 | -2.13276044668284 | -3.06794567120923 |
| C | -5.72689899558813 | -3.74490374066845 | -1.65940720114615 |
| C | -4.63346279316219 | -2.63537672625148 | -3.64760367820133 |
| H | -5.85826997541393 | 0.74103365005407  | -0.99956502896970 |
| H | -4.46808652276143 | 1.80901809134923  | -1.27750897013446 |
| H | -2.19338123060579 | 0.98452614070499  | -0.47877740959341 |
| H | -2.14725622234928 | -0.61424942186077 | 0.29181056493299  |
| F | -5.90783407742499 | 2.91161314628869  | 0.51741302931460  |
| H | -5.73589047610079 | 1.11845827147278  | 1.40195073008119  |
| H | -4.03157444308766 | 2.60302993011126  | 2.39033278036008  |
| H | -3.35146962807295 | 2.91423667335435  | 0.77810649962706  |
| H | -3.32340881672884 | 0.24329029198007  | 2.24826791062115  |
| F | -1.68983973510865 | 1.37939013612085  | 1.98849491241266  |
| H | -7.35990988731768 | -2.93559734810623 | -3.71392509635387 |
| H | -6.95179992814191 | -1.21275067185312 | -3.65003207616853 |
| H | -7.72095913836736 | -1.99589718401867 | -2.25632036734329 |
| H | -6.13392312797958 | -4.55309315553512 | -2.26807770346199 |
| H | -6.39987853532561 | -3.57901961519165 | -0.81736548887003 |
| H | -4.75157570422240 | -4.04513349405769 | -1.28671311164928 |
| H | -4.99144915506563 | -3.40056154123861 | -4.33696535948572 |
| H | -3.65388497513782 | -2.92812134234798 | -3.27942560806643 |
| H | -4.54716330486846 | -1.69551532811236 | -4.19431194925777 |
| O | -5.30915029941191 | -1.33109094453330 | -1.69493947348765 |

### 15\_a, DMSO

|   |                   |                  |                   |
|---|-------------------|------------------|-------------------|
| C | -5.73772717958485 | 1.13607538163459 | 0.40782999564915  |
| C | -5.20026803820933 | 1.12507321220198 | -1.01233627592316 |
| C | -4.69681241660393 | 1.62488223506773 | 1.39872156533446  |

|   |                   |                   |                   |
|---|-------------------|-------------------|-------------------|
| C | -3.34044143938808 | 0.96690888995620  | 1.22115345692429  |
| C | -2.90643024724765 | 0.95816539858664  | -0.23298885892232 |
| N | -3.95022906979369 | 0.39517180416051  | -1.06642393989145 |
| C | -3.98085108472826 | -0.91323642586151 | -1.43158375480423 |
| O | -4.95468312533004 | -1.44988737437103 | -1.91993563018003 |
| C | -2.70651677568674 | -2.95757149536825 | -1.15196125661622 |
| C | -1.25294149010478 | -3.16322911223806 | -0.75841627849288 |
| C | -2.99078175225301 | -3.61444765662412 | -2.49313533057032 |
| C | -3.63083390803277 | -3.45606037801889 | -0.05211490000317 |
| H | -5.91751940083912 | 0.66843255022135  | -1.68627045092696 |
| H | -5.02532302610841 | 2.15588074672567  | -1.32819749374707 |
| H | -2.72801048267155 | 1.98899085906458  | -0.54824383958735 |
| H | -1.98673469824880 | 0.39719610457583  | -0.35094853921678 |
| H | -6.63551724643009 | 1.75171869277283  | 0.46152541848550  |
| F | -6.11597858422010 | -0.16714149544962 | 0.74359833367239  |
| H | -5.05310418435660 | 1.48536801853335  | 2.41907358351282  |
| H | -4.56696384004734 | 2.69853762314367  | 1.24092430210924  |
| F | -3.40419592385068 | -0.35765610757737 | 1.66454129186861  |
| H | -2.58932514115403 | 1.46976539037605  | 1.82993994777334  |
| H | -4.67570150992799 | -3.31311288563741 | -0.31966943182304 |
| H | -3.42475576008287 | -2.91859113874888 | 0.87397568753641  |
| H | -3.45389548431410 | -4.51880692051987 | 0.11209802176901  |
| H | -2.38025519496866 | -3.15557357451915 | -3.27192043903952 |
| H | -4.03904400338046 | -3.52524170102704 | -2.76326021965497 |
| H | -2.72894104238723 | -4.67113702195940 | -2.42940043228186 |
| H | -0.59282171599258 | -2.77556047990534 | -1.53492587529408 |
| H | -1.05261179126374 | -4.22561414392752 | -0.62559903197822 |
| H | -1.04034777977052 | -2.64336177886496 | 0.17616484430457  |
| O | -2.80766666302199 | -1.51272721240257 | -1.24424446998615 |

### 16\_a, Gas Phase

|   |                   |                   |                   |
|---|-------------------|-------------------|-------------------|
| C | -3.56702829499626 | 2.01289453560131  | 0.12776159093122  |
| C | -3.63215350812117 | 0.882066348520035 | -0.89285393685084 |
| C | -2.30213873880407 | 2.86341707587739  | -0.03441811218287 |
| H | -3.58214910825392 | 1.56508217602221  | 1.12481026963057  |
| H | -4.45702215804605 | 2.63773599599894  | 0.03459882671239  |
| C | -1.06707365600074 | 1.95440900508794  | -0.04981517950737 |
| H | -2.22646820344517 | 3.51428798867775  | 0.83985272366083  |
| C | -2.36901267423036 | 3.76253446956981  | -1.26660738265974 |
| C | -1.20550221829453 | 0.80568605386954  | -1.04492109301736 |
| H | -0.91341891234683 | 1.52709031378763  | 0.94409303718119  |
| H | -0.17509258231234 | 2.53627153315398  | -0.29275689192724 |
| N | -2.43606409165628 | 0.06551432677891  | -0.79525415703201 |
| H | -3.67820974182776 | 1.28081112634706  | -1.90977289736732 |
| H | -4.5206511690119  | 0.28008015741713  | -0.74590794843008 |
| C | -2.35582145532307 | -1.18820675672157 | -0.31538406582611 |
| O | -1.33058735052324 | -1.79600420833147 | -0.13192217879471 |
| C | -3.68799783867129 | -1.91225579418614 | 0.01937953780638  |
| F | -4.48775937601054 | -2.00274680656326 | -1.05040493965252 |
| F | -4.36415368246968 | -1.26795719730721 | 0.98188751852484  |
| F | -3.44316836649966 | -3.13399159066943 | 0.44716400850531  |
| H | -1.24245392321994 | 1.18460761641526  | -2.06969674462882 |
| H | -0.36978502026810 | 0.11732824222286  | -0.96740932657585 |
| H | -1.49748326977945 | 4.41655920287309  | -1.31266280312225 |
| H | -3.25936492170352 | 4.39203604838896  | -1.23700559224729 |
| H | -2.39980979029482 | 3.19273300048890  | -2.19621426313067 |

### 16\_a, Benzene

|   |                   |                   |                   |
|---|-------------------|-------------------|-------------------|
| C | -3.56564143935819 | 2.01524936751410  | 0.12905696230919  |
| C | -3.63105507324044 | 0.88160000841327  | -0.88774903405529 |
| C | -2.30156288813573 | 2.86621788191403  | -0.03560923359439 |
| H | -3.58071760964132 | 1.57251010174963  | 1.12844658684820  |
| H | -4.45638966185325 | 2.63784895006769  | 0.03034943757008  |
| C | -1.06632706609096 | 1.95775148884444  | -0.04885320389106 |
| H | -2.22594535588560 | 3.51772607314696  | 0.83803707710516  |
| C | -2.36911092673486 | 3.76373152962668  | -1.26903601325343 |
| C | -1.20414085192897 | 0.80670687576417  | -1.04081945942403 |
| H | -0.91161309349022 | 1.53485422446386  | 0.94682259124308  |
| H | -0.17491018670187 | 2.53782181413654  | -0.29741528931919 |
| N | -2.43357934496220 | 0.06296845482060  | -0.78252808151483 |
| H | -3.66868952738243 | 1.27508508124770  | -1.90628174012495 |
| H | -4.52148979685822 | 0.28242430346796  | -0.74208444601272 |
| C | -2.35854124312367 | -1.18796015928571 | -0.31680106542665 |
| O | -1.33387055763594 | -1.80902312983408 | -0.13859597586975 |
| C | -3.69111530363099 | -1.91256387454458 | 0.01596290193245  |

|   |                   |                   |                   |
|---|-------------------|-------------------|-------------------|
| F | -4.48890778528022 | -2.00708253327675 | -1.05389652059458 |
| F | -4.36992929493717 | -1.27680206255244 | 0.97979796222154  |
| F | -3.44266320250061 | -3.13774749118593 | 0.44185880284576  |
| H | -1.25289871768944 | 1.18252078732158  | -2.06559264322023 |
| H | -0.36382653127456 | 0.12408264456948  | -0.96828527025285 |
| H | -1.49620297633708 | 4.41621997374638  | -1.31537901585058 |
| H | -3.25927541795987 | 4.39367003348564  | -1.23714513904131 |
| H | -2.40196614736617 | 3.19216965637870  | -2.19772019062966 |

### 16\_a, Dichloromethane

|   |                   |                   |                   |
|---|-------------------|-------------------|-------------------|
| C | -3.56485832967399 | 2.01599747738180  | 0.12931024426769  |
| C | -3.63017973410609 | 0.88128623420596  | -0.88579067447429 |
| C | -2.30129438178700 | 2.86729939806973  | -0.03603828092519 |
| H | -3.58067262878309 | 1.57617091919492  | 1.13002885282218  |
| H | -4.45598789185478 | 2.63709625591621  | 0.02660797394163  |
| C | -1.06583520881399 | 1.95938613538424  | -0.04841750834198 |
| H | -2.22584381962022 | 3.51849689927428  | 0.83771298439233  |
| C | -2.36907729629132 | 3.76464208100696  | -1.26959585780430 |
| C | -1.20315006571053 | 0.80755144543006  | -1.03920388910491 |
| H | -0.91022485769878 | 1.53908340602935  | 0.94827757900703  |
| H | -0.17501754703033 | 2.53853302396702  | -0.30065413100627 |
| N | -2.43165265858745 | 0.06094544968391  | -0.77485596909794 |
| H | -3.66096931515141 | 1.27160335005360  | -1.90516974983584 |
| H | -4.52211014178309 | 0.28400742907256  | -0.74227384281936 |
| C | -2.36073201673299 | -1.18703564557751 | -0.31764917055802 |
| O | -1.33620890638054 | -1.81818109201013 | -0.14250821776879 |
| C | -3.69356121623749 | -1.91134207449394 | 0.01484402890133  |
| F | -4.48973116339257 | -2.01119631068021 | -1.05451171005568 |
| F | -4.37362968867186 | -1.28050617755241 | 0.97889568573348  |
| F | -3.44187976431639 | -3.13864905490187 | 0.44165346524571  |
| H | -1.26086489664881 | 1.18204973378213  | -2.06347032195061 |
| H | -0.35927521452284 | 0.12928559296080  | -0.97140208267154 |
| H | -1.49553925938300 | 4.41654070982995  | -1.31507834696790 |
| H | -3.25953051531727 | 4.39422542482800  | -1.23605025508540 |
| H | -2.40254348150412 | 3.19268938914455  | -2.19812080584338 |

### 16\_a, Chloroform

|   |                   |                   |                   |
|---|-------------------|-------------------|-------------------|
| C | -3.56487136714766 | 2.01842572548214  | 0.13102157680486  |
| C | -3.63022812069024 | 0.88186375629277  | -0.88216317179748 |
| C | -2.30139231212276 | 2.86942659356052  | -0.03639049689546 |
| H | -3.58016602283439 | 1.57992708000889  | 1.13232749566615  |
| H | -4.45588963673692 | 2.63976829590628  | 0.02838992481780  |
| C | -1.06600128732065 | 1.96144137288230  | -0.04668577679285 |
| H | -2.22593274544672 | 3.52339188246663  | 0.83533771146613  |
| C | -2.36942786822464 | 3.76292530429741  | -1.27269720992439 |
| C | -1.20286449467484 | 0.80723898977850  | -1.03494839397322 |
| H | -0.91080826413511 | 1.54304986981832  | 0.95085856825139  |
| H | -0.17512279963291 | 2.54053932848496  | -0.29897088410159 |
| N | -2.43210185325972 | 0.06260579014409  | -0.77171516519551 |
| H | -3.66426756363796 | 1.27118430510286  | -1.90204813727618 |
| H | -4.52168288318589 | 0.28453633404257  | -0.73572619551057 |
| C | -2.36039718273052 | -1.18948293626180 | -0.32112187252553 |
| O | -1.33625396021513 | -1.82067921163001 | -0.15335268244308 |
| C | -3.69306444666254 | -1.91387712170022 | 0.01194003491565  |
| F | -4.49278412709540 | -2.00652864295637 | -1.05581931122853 |
| F | -4.36973630253316 | -1.28537057924913 | 0.98058227921927  |
| F | -3.44242321299341 | -3.14274142753102 | 0.43232275125847  |
| H | -1.25542799673993 | 1.17946951999203  | -2.06055230306177 |
| H | -0.36053934415855 | 0.12745496033550  | -0.96221382893854 |
| H | -1.49590375865653 | 4.41458629866111  | -1.32130570472554 |
| H | -3.25952887925819 | 4.39311078042376  | -1.24145191231864 |
| H | -2.40355356990622 | 3.18771373164786  | -2.19907729569087 |

### 16\_a, DMSO

|   |                   |                  |                   |
|---|-------------------|------------------|-------------------|
| C | -3.56439240420561 | 2.01944177769525 | 0.13158200911494  |
| C | -3.62967245703115 | 0.88187591294486 | -0.88013136663397 |
| C | -2.30128773482037 | 2.87060169023890 | -0.03666534320597 |
| H | -3.58021296479092 | 1.58316486753606 | 1.13388697808014  |
| H | -4.45561301441150 | 2.63982966514483 | 0.02621884085534  |
| C | -1.06575986948807 | 1.96299950744984 | -0.04584948652208 |
| H | -2.22596710141596 | 3.52498689582652 | 0.83466897466993  |
| C | -2.36954428696167 | 3.76296504062208 | -1.27377739159007 |
| C | -1.20206836708428 | 0.80776588775701 | -1.03281117517744 |

|   |                   |                   |                   |
|---|-------------------|-------------------|-------------------|
| H | -0.91012376920319 | 1.54679084458817  | 0.95258363495660  |
| H | -0.17527187740467 | 2.54147345206745  | -0.30055169106581 |
| N | -2.43090090927968 | 0.06167746234243  | -0.76594823254703 |
| H | -3.65957840193254 | 1.26886888003894  | -1.90066298524789 |
| H | -4.52201013441765 | 0.28577312112770  | -0.73453674967649 |
| C | -2.36182337445312 | -1.18931028697073 | -0.32292333936702 |
| O | -1.33772504725998 | -1.82749621869551 | -0.15929673096102 |
| C | -3.69456634188685 | -1.91332842611874 | 0.01051481883628  |
| F | -4.49427251768878 | -2.00817502697896 | -1.05623757959477 |
| F | -4.37078451236335 | -1.28848740704364 | 0.98047051354745  |
| F | -3.44185746853046 | -3.14401268307815 | 0.43023997283447  |
| H | -1.25929285606981 | 1.17857669242460  | -2.05838276441605 |
| H | -0.35789926774160 | 0.13035566891971  | -0.96176930514976 |
| H | -1.49544626934648 | 4.41392329921149  | -1.32287641848492 |
| H | -3.25961246590915 | 4.39323212211886  | -1.24183931744998 |
| H | -2.40468658630313 | 3.18648726083096  | -2.19936586580489 |

## 16\_a, Water

|   |                   |                   |                   |
|---|-------------------|-------------------|-------------------|
| C | -3.56448350855462 | 2.01653421869555  | 0.12969536057828  |
| C | -3.62978408901895 | 0.88124381626636  | -0.88454606864856 |
| C | -2.30116844324841 | 2.86796539400418  | -0.03626463063145 |
| H | -3.58050735477015 | 1.57797377057859  | 1.13098372863147  |
| H | -4.45578890083509 | 2.63701936129991  | 0.02550006065112  |
| C | -1.06558111024801 | 1.96030588387119  | -0.04804180920976 |
| C | -2.22576365860315 | 3.51938218877933  | 0.83727644952382  |
| C | -2.36921070050970 | 3.76473423235896  | -1.27022561767188 |
| C | -1.20270142489570 | 0.80784562025694  | -1.03801309844979 |
| H | -0.90961503018040 | 1.54130567029882  | 0.94916782592589  |
| H | -0.17499735172522 | 2.53905668952779  | -0.30180310532582 |
| N | -2.43087731132922 | 0.06034214585753  | -0.77146545211226 |
| H | -3.65817498283020 | 1.27021201508955  | -1.90430123022580 |
| H | -4.52213310572952 | 0.28453951662669  | -0.74166903089556 |
| C | -2.36155664267947 | -1.18705140850199 | -0.31833351778471 |
| O | -1.33705989310303 | -1.82189414923810 | -0.14475299454208 |
| C | -3.69455588308652 | -1.91108809329694 | 0.01392545722082  |
| F | -4.49034770663397 | -2.01192408591275 | -1.05516338402475 |
| F | -4.37462395387699 | -1.28242808731762 | 0.97864435187509  |
| F | -3.44188693295254 | -3.13948462724168 | 0.44025715654077  |
| H | -1.26351849653669 | 1.18158122582880  | -2.06221253554767 |
| H | -0.35770315760833 | 0.13097235842358  | -0.97162655695583 |
| H | -1.49543999430444 | 4.41636074338037  | -1.31588306305349 |
| H | -3.25974082090295 | 4.39421515102604  | -1.23616728939043 |
| H | -2.40314954583671 | 3.19226044933885  | -2.19844100647802 |

## 16\_e, Gas Phase

|   |                   |                   |                   |
|---|-------------------|-------------------|-------------------|
| C | -3.56501536990004 | 2.18352386646870  | -0.03372073070302 |
| C | -3.63661428590143 | 1.00175369208867  | -0.99229568407128 |
| C | -2.31035694854937 | 3.02191613831862  | -0.27268196908164 |
| H | -3.55714805870312 | 1.80192972971603  | 0.99239114060810  |
| H | -4.45892797217822 | 2.79947877930763  | -0.14765282007624 |
| C | -1.07318886549771 | 2.12595526619787  | -0.22681238962813 |
| C | -2.21069541581957 | 4.16763115060523  | 0.72329321333371  |
| H | -2.38003651125949 | 3.44292448994482  | -1.28351339877032 |
| C | -1.20941959547943 | 0.92841238644275  | -1.16076101469103 |
| H | -0.92424941095040 | 1.76427230753682  | 0.79535751607225  |
| H | -0.18336144079447 | 2.69823521823369  | -0.49901219301027 |
| N | -2.43592436167336 | 0.19592064617816  | -0.87437406752713 |
| H | -3.69192906267126 | 1.36305115818596  | -2.02408088597433 |
| H | -4.52024448719518 | 0.40199347318857  | -0.81172561219578 |
| C | -2.34981647753884 | -1.05033991892771 | -0.37552957835348 |
| O | -1.32272690407527 | -1.65579329430769 | -0.19642552338110 |
| C | -3.67730457719073 | -1.76707874394876 | -0.00722732620288 |
| F | -4.48948869748409 | -1.88413422182569 | -1.06509927073632 |
| F | -4.34266029219909 | -1.10913992219906 | 0.94765339944143  |
| F | -3.42559407944563 | -2.97796116047333 | 0.44630131090882  |
| H | -1.33814376394633 | 4.79115390877494  | 0.52454772938516  |
| H | -2.12180662310623 | 3.78127830982974  | 1.74097700471228  |
| H | -3.09685177279442 | 4.80248975892310  | 0.68290992637460  |
| H | -1.25693809330009 | 1.27122792319490  | -2.19910745314396 |
| H | -0.37146693234623 | 0.24561182856604  | -1.06179138628944 |

## 16\_e, Benzene

|   |                   |                  |                   |
|---|-------------------|------------------|-------------------|
| C | -3.56187300632126 | 2.18981037064067 | -0.02368064839269 |
|---|-------------------|------------------|-------------------|

|   |                   |                   |                   |
|---|-------------------|-------------------|-------------------|
| C | -3.63610337474103 | 1.00041052581197  | -0.97172498315431 |
| C | -2.30942688701423 | 3.02759481345112  | -0.27411756707324 |
| H | -3.55060612395104 | 1.81909596723491  | 1.00649458146126  |
| H | -4.45733631183721 | 2.80187931628705  | -0.14414280276530 |
| C | -1.07223500889693 | 2.13275008574589  | -0.21978920040944 |
| C | -2.20922342020251 | 4.18363261551819  | 0.710146220248909 |
| H | -2.38100154937024 | 3.43754830052546  | -1.28898143093474 |
| C | -1.20722583551904 | 0.92742040548483  | -1.14314702523657 |
| H | -0.92262839792871 | 1.78216564776668  | 0.80619802093007  |
| H | -0.18292681333806 | 2.70099930944144  | -0.50125234910043 |
| N | -2.43347382197940 | 0.19347704919684  | -0.84686488115722 |
| H | -3.68900265841411 | 1.35137877015512  | -2.00641954106308 |
| H | -4.52075693827244 | 0.40455791949041  | -0.78447166188074 |
| C | -2.35442270618426 | -1.05893359512654 | -0.38524346643423 |
| O | -1.32915259078308 | -1.68406834322627 | -0.22706313790603 |
| C | -3.68250422683361 | -1.77912090114933 | -0.02492559745346 |
| F | -4.49648360546158 | -1.88300092463042 | -1.08172649541847 |
| F | -4.34622150268185 | -1.13500491495254 | 0.94359794362686  |
| F | -3.42776790636538 | -3.00074247213744 | 0.40757414555324  |
| H | -1.33652973921730 | 4.80464230817530  | 0.50308302562806  |
| H | -2.11974346699506 | 3.80741215696921  | 1.731790960535328 |
| H | -3.09606467786643 | 4.81738350716626  | 0.66237995122229  |
| H | -1.26187773326694 | 1.26078363995249  | -2.18356889362461 |
| H | -0.36532169655831 | 0.25046844220868  | -1.04252114944157 |

## 16\_e, Dichloromethane

|   |                   |                   |                   |
|---|-------------------|-------------------|-------------------|
| C | -3.56003657388536 | 2.19208759167786  | -0.01849989163297 |
| C | -3.63566866259034 | 0.99994375090152  | -0.96231390794473 |
| C | -2.30894925891804 | 3.02980989175520  | -0.27446176282466 |
| H | -3.54741839567238 | 1.82646770520645  | 1.01357391511177  |
| H | -4.45637159501399 | 2.80176605753981  | -0.14282889080028 |
| C | -1.07156721703212 | 2.13586701181167  | -0.21641096254737 |
| C | -2.20852858189168 | 4.19062632545672  | 0.70431290542400  |
| H | -2.38167122565000 | 3.43443417843685  | -1.29102745916728 |
| C | -1.20582705489016 | 0.92749425003581  | -1.13545227713303 |
| H | -0.92107768202188 | 1.7905553424442   | 0.81131188602110  |
| H | -0.18290266041891 | 2.70208928411381  | -0.50335161669562 |
| N | -2.43169946496350 | 0.19153146830751  | -0.83326580035409 |
| H | -3.68490280121963 | 1.34604730005720  | -1.99813955827409 |
| H | -4.52130141301606 | 0.40631751102895  | -0.77333601300719 |
| C | -2.35748835870924 | -1.06111554793901 | -0.38912072076332 |
| O | -1.33285094416687 | -1.69829986667589 | -0.23919855523586 |
| C | -3.68594741338425 | -1.78297308695976 | -0.03324156779610 |
| F | -4.49950791464490 | -1.88345166278591 | -1.08946810973531 |
| F | -4.34968649788815 | -1.15114231424547 | 0.94130291615682  |
| F | -3.42817538125619 | -3.01023080471413 | 0.39023996056499  |
| H | -1.33586078234040 | 4.81040874120863  | 4.9278445351475   |
| H | -2.11868578519781 | 3.81927367820965  | 1.72787179428597  |
| H | -3.09595991540248 | 4.82344948649513  | 0.65264784112095  |
| H | -1.26698252426671 | 1.25689213140472  | -2.17619491563064 |
| H | -0.36084189555895 | 0.25469138542827  | -1.03611366265782 |

## 16\_e, Chloroform

|   |                   |                   |                   |
|---|-------------------|-------------------|-------------------|
| C | -3.56057088577882 | 2.19145213829180  | -0.01998619209382 |
| C | -3.63577897681021 | 1.00004499253050  | -0.96497176683949 |
| C | -2.30910016135113 | 3.02921324454101  | -0.27439505426360 |
| H | -3.54825283162159 | 1.82436165832901  | 1.01153867788689  |
| H | -4.45667065800991 | 2.80182900828953  | -0.14310461418940 |
| C | -1.07176112986520 | 2.13501273844888  | -0.21743978586809 |
| C | -2.20872260514260 | 4.18864720495029  | 0.70597351560401  |
| H | -2.38152691879644 | 3.43539178245147  | -1.29047746851243 |
| C | -1.20623887748362 | 0.92744630140067  | -1.13763585085781 |
| H | -0.92150395405538 | 1.78820892775472  | 0.80978569705663  |
| H | -0.18291034661280 | 2.70183550578460  | -0.50279958908224 |
| N | -2.43222106830323 | 0.19212187934877  | -0.83715501012945 |
| H | -3.68619093549605 | 1.34753672203999  | -2.00049140381803 |
| H | -4.52111021860719 | 0.40575535803370  | -0.77643641670452 |
| C | -2.35655397406717 | -1.06058654188364 | -0.38794329032844 |
| O | -1.33178951436749 | -1.69415173814896 | -0.23563511082659 |
| C | -3.68493324202088 | -1.78197918268975 | -0.03088518021279 |
| F | -4.49856765801638 | -1.88327642652617 | -1.08738957588647 |
| F | -4.34878176004610 | -1.14650916085876 | 0.94185406524995  |
| F | -3.42817886788106 | -3.00756818603841 | 0.39516784005699  |
| H | -1.33606545927223 | 4.80881046729829  | 0.49572932059380  |
| H | -2.11891614566211 | 3.81585864470426  | 1.72896267613173  |

H -3.09598904212602 4.82174134753687 0.65552336109922  
H -1.26540901816136 1.25791610330073 -2.17833446238918  
H -0.36216575044503 0.25342721111058 -1.03783438167686

H -0.67890677590452 -1.31110195684931 1.15967506894724  
C -3.65554480133866 -0.99294443118950 1.94493223935836  
O -3.49334509377847 -1.12159132327670 3.12907916774585  
C -5.08477095078550 -1.22107780943112 1.38131585709727  
F -5.09439552042444 -2.23857865545114 0.50640789962455  
F -5.55926444545200 -0.14088650627353 0.75657039163249  
F -5.90813124092436 -1.52262720351114 2.36347803318380  
H -0.03462631091154 0.49813890191686 -2.20903639494817  
H 0.00472048944257 -0.75863966000067 -0.98002237418599  
H 1.11710135663250 0.59830256478578 -0.88127630315920

### 16\_e, DMSO

C -3.55954421204508 2.19256646678962 -0.01715550375969  
C -3.63554488382117 0.99989327702087 -0.96004818453838  
C -2.30881995759249 3.03027112845338 -0.27446961106660  
H -3.54670888193204 1.82821913224194 1.01539656296879  
H -4.45609067346742 2.80158135392787 -0.14264854967076  
C -1.07138364323464 2.13659100303645 -0.21545969043018  
C -2.20839321695779 4.19229581197629 0.70291433589961  
H -2.38180259750537 3.43351927920356 -1.29144025527928  
C -1.20540374561201 0.92759774254507 -1.13360032366187  
H -0.92067392399024 1.79257149176371 0.81269660421139  
H -0.18291549346228 2.70227767600906 -0.50386867294187  
N -2.43117930125156 0.19093523067548 -0.829816370082612  
H -3.68342750116718 1.34481664467028 -1.9961122051358  
H -4.52151593471260 0.40686995127153 -0.77092839155115  
C -2.35839801314451 -1.88378724540356 -0.39022230942282  
O -1.33383855644450 -1.70221033380671 -0.24248846070088  
C -3.68691329571324 -1.78360639841152 -0.03524709775124  
F -4.50038842309652 -1.88378724540356 -1.091113184801133  
F -4.35047130048665 -1.15496422993556 0.94082456280422  
F -3.42809997553515 -3.01235365463656 0.38625383268477  
H -1.33572235024929 4.81174121745575 0.49021730978516  
H -2.11854554880433 3.82222007952529 1.72698579147606  
H -3.09599847226966 4.82483199284649 0.65009817574958  
H -1.26857838177954 1.25615135576288 -2.17430187336955  
H -0.35954171572476 0.25594673791459 -1.03484747529426

### 17\_a, Benzene

C -2.33919550739111 0.82436272800042 -0.79077515831416  
C -2.81776817930132 -0.55349036905626 -0.36757345530037  
C -0.91953453232620 1.11838114520916 -0.32062946736662  
F -3.21122127213435 1.76302812359435 -0.26205167641557  
H -2.39578126368100 0.90270734006761 -1.87784065075567  
N -2.67210434274946 -0.71158822365597 1.06466991565413  
H -2.22018887554322 -1.31596280778554 -0.87469055132486  
H -3.84794785419074 -0.68183899047343 -0.67500254134582  
C -0.76186883872036 0.82352398953881 1.16748040745086  
C -1.31442643016953 -0.53608951114833 1.55671635750236  
F -1.42208533164564 1.79391510982753 1.90604381783198  
H 0.29381175107716 0.86912167427708 1.44454186981482  
H -0.73807618687340 2.18470503756639 -0.46731382825719  
C 0.09914276989175 0.32885189481704 -1.14227378385149  
H -1.31408499198866 -0.63737140888130 2.63722992508802  
H -0.67574397559048 -1.31735739641539 1.13522302983605  
C -3.65260316027491 -0.98166425523816 1.94145485287798  
O -3.50156816698548 -1.09473639792828 3.13395243021225  
C -5.08383409969430 -1.20283403348153 1.37961940555724  
F -5.11079327591648 -2.22854886315148 0.51811792748204  
F -5.55147577356241 -0.12350791487090 0.74868201720179  
F -5.90994598349069 -1.48535324733172 2.36935693857502  
H -0.03079036289584 0.52561901106612 -2.20633176117394  
H 0.00854129639969 -0.74762243145973 -0.99251502680519  
H 1.11448258775694 0.61473979691354 -0.86964099417368

### 16\_e, Water

C -3.55949741963058 2.19260566168169 -0.01703249695069  
C -3.63554308492709 0.99988973043001 -0.95984632475284  
C -2.30880666347915 3.03030978891030 -0.27446670743881  
H -3.54664976184129 1.82837329667863 1.01556332340580  
H -4.45606222027394 2.80155819439107 -0.14264120337090  
C -1.07136386121909 2.13665623095896 -0.21537273261748  
C -2.20837944928046 4.19244269871036 0.70279269997370  
H -2.38181310932698 3.43343359487768 -1.29147223210826  
C -1.20536396330392 0.92761197185372 -1.13343783980236  
H -0.92062687227768 1.79275494710175 0.81282258084381  
H -0.18291856494425 2.70229482832037 -0.50392663750871  
N -2.43112671709453 0.19087516642999 -0.82949503791745  
H -3.68327093853419 1.34470211499345 -1.99593062002526  
H -4.52153862732433 0.40692487712961 -0.77072526352836  
C -2.35848771190635 -1.06145000457789 -0.39031351640189  
O -1.33393080934126 -1.70257359606948 -0.24275827253929  
C -3.68701042767146 -1.78365044801765 -0.03542863525771  
F -4.50046486677788 -1.88382751287320 -1.09126341913233  
F -4.35056048273668 -1.15531597392381 0.94077920132761  
F -3.42808787488240 -3.01253995468836 0.38589935765709  
H -1.33570991109292 4.81185873639171 0.48998493360623  
H -2.11852946431540 3.82248252204957 1.72691087808374  
H -3.09600332973645 4.82494898896767 0.64987004706975  
H -1.26875388003374 1.25609561998762 -2.17412890069190  
H -0.35940998804798 0.25607852028624 -1.03476318192348

### 17\_a, Dichloromethane

C -2.34272798542789 0.80691081454185 -0.78809457600668  
C -2.80786094110555 -0.57691591038633 -0.37226509611553  
C -0.92868834832502 1.11621455389639 -0.31401897734894  
F -3.22926476517438 1.73457592979142 -0.24885375596812  
H -2.40276487120057 0.89377995820516 -1.87328161006874  
N -2.66668904886953 -0.73155290351949 1.06298434845775  
H -2.19538404551921 -1.33101809472333 -0.87160225724323  
H -3.83335882872697 -0.72114527317550 -0.68786634425254  
C -0.76430507319531 0.80913610117560 1.16976696552308  
C -1.30490058128249 -0.55680898451266 1.54938416560502  
F -1.43871206880186 1.76856736812411 1.92136614319263  
H 0.28936214013187 0.86547137648634 1.44845947853402  
H -0.75866014024950 2.18535490370375 -0.45352193034340  
C 0.09965558246979 0.34669202692166 -1.14276887413022  
H -1.29124227677099 -0.67320769761534 2.62782182943513  
H -0.66976801070513 -1.32884596874940 1.10852719154450  
C -3.65136760884888 -0.95890170695836 1.93774557936484  
O -3.51334759732289 -1.03461908838507 3.13924657599700  
C -0.08300992742403 -1.18112006513058 1.37648549180537  
F -5.12255002425524 -2.22040565449005 0.53565585441844  
F -5.54398868233381 -0.10799964521784 0.73021252981503  
F -5.91285271010678 -1.43872167978602 2.37358806031189  
H -0.03549969220973 0.55276817292883 -2.20423336368786  
H 0.02264017049844 -0.73197712498612 -1.00219748314035  
H 1.11022533475565 0.64475858825698 -0.86608994569911

### 17\_a, Gas Phase

C -2.33810123019430 0.83990500615326 -0.79005925366117  
C -2.82498099044754 -0.53593802259353 -0.36510496031478  
C -0.91267360297886 1.11956938794360 -0.32428159219710  
F -3.19649215297155 1.78304480749171 -0.26593193552094  
H -2.39233624691045 0.91487973401831 -1.87896298168775  
N -2.67493342204320 -0.70036024338579 1.06303291671053  
H -2.24056591102708 -1.30342917627359 -0.88285638701439  
H -3.85928177452616 -0.65168236499708 -0.66427995544731  
C -0.75927245326865 0.83295905802613 1.16751351653918  
C -1.32282727746650 -0.52227450080005 1.56201413867428  
F -1.40300952950637 1.81065580503508 1.89669288650414  
H 0.29951904765132 0.86632510013982 1.44034370021751  
H -0.722639302984966 2.18400908067917 -0.47444757020514  
C 0.09768433450059 0.31589895674547 -1.14250318855323  
H -1.33793246751719 -0.61156663940202 2.64415708065998

### 17\_a, Chloroform

C -2.34146401216443 0.81247992747693 -0.78930031863465  
C -2.81129629704040 -0.569193314515182 -0.37077356638558  
C -0.92569904050071 1.11697013499734 -0.31629073139199  
F -3.22339075960194 1.74406549449776 -0.25397100781547  
H -2.40016297144870 0.89625636188496 -1.87511423357811  
N -2.66845130331547 -0.72509029768245 1.06348591837322  
H -2.20401770476325 -1.32626342291856 -0.87271260207284

|   |                   |                   |                   |
|---|-------------------|-------------------|-------------------|
| H | -3.83844264291909 | -0.70788340032642 | -0.68356784014477 |
| C | -0.76375973643660 | 0.81397099499333  | 1.16892987995050  |
| C | -1.30787808111460 | -0.55010275631786 | 1.55156807151756  |
| F | -1.43423577327171 | 1.77680184727756  | 1.91612360880989  |
| H | 0.29042602708151  | 0.86729692978914  | 1.44744337683208  |
| H | -0.75198607359644 | 2.18519619971463  | -0.45829096910533 |
| C | 0.09981914758323  | 0.34083693854607  | -1.14232786466939 |
| H | -1.29837829354554 | -0.66169950746416 | 2.63069426103757  |
| H | -0.67154392660726 | -1.32489986932870 | 1.11661154618443  |
| C | -3.65158208877936 | -0.96708307681613 | 1.93899629914298  |
| O | -3.50913435929607 | -1.05611030788460 | 3.13763074804823  |
| C | -5.08332219618565 | -1.18796320197619 | 1.37774704910067  |
| F | -5.11966048578795 | -2.22232351486683 | 0.52949455723401  |
| F | -5.54601646127522 | -0.11208745664648 | 0.73730456050881  |
| F | -5.91186018924666 | -1.45389468682057 | 2.37254609404186  |
| H | -0.03404415765609 | 0.54277697051710  | -2.20480556269202 |
| H | 0.01921840445365  | -0.73703444148505 | -0.99748854728988 |
| H | 1.11180297543420  | 0.63596745499100  | -0.86748272700187 |

## 17\_a, DMSO

|   |                   |                   |                   |
|---|-------------------|-------------------|-------------------|
| C | -2.34400554115532 | 0.80175446056332  | -0.78652523576289 |
| C | -2.80446634776211 | -0.58429036882936 | -0.37372022752780 |
| C | -0.93146795976755 | 1.11535849617260  | -0.31178894982593 |
| F | -3.23482335796850 | 1.72531804378840  | -0.24271062964920 |
| H | -2.40572695255298 | 0.89203666589622  | -1.87104604702097 |
| N | -2.66505794479048 | -0.73775348071429 | 1.06252168427873  |
| H | -2.18692267120182 | -1.33540567380564 | -0.87057025929356 |
| H | -3.82830120310611 | -0.73385539661447 | -0.69213464556254 |
| C | -0.76455329335296 | 0.80443927613594  | 1.17060754095444  |
| C | -1.30227517302946 | -0.56299076765759 | 1.54761069536500  |
| F | -1.44208056729271 | 1.76094134272410  | 1.92665370053836  |
| H | 0.28870958949989  | 0.86306786245008  | 1.44925840660882  |
| H | -0.76467093987402 | 2.18530313237877  | -0.44899420498994 |
| C | 0.09932196907012  | 0.35201268142518  | -1.14344273402736 |
| H | -1.28489079835086 | -0.68378569343466 | 2.62537828956947  |
| H | -0.66837707260988 | -1.33267990499585 | 1.10172166761183  |
| C | -3.65129755220335 | -0.95049466798738 | 1.93621958888882  |
| O | -3.51789605777994 | -1.01190236098043 | 3.14056128987064  |
| C | -5.08262639823016 | -1.17503205533866 | 1.37481776289466  |
| F | -5.12465518875764 | -2.21846342726542 | 0.54061280565801  |
| F | -5.54272638697808 | -0.10443312565829 | 0.72377373216669  |
| F | -5.91351863899481 | -1.42578844055468 | 2.37406271580352  |
| H | -0.03773095068699 | 0.56174181254110  | -2.20389149378034 |
| H | 0.02641531717084  | -0.72746799502001 | -1.00684771933115 |
| H | 1.10856412070485  | 0.65335958478105  | -0.86567773043730 |

## 17\_a, Water

|   |                   |                   |                   |
|---|-------------------|-------------------|-------------------|
| C | -2.34409594198365 | 0.80121374375473  | -0.78643443704453 |
| C | -2.80418477818204 | -0.58497631059377 | -0.37380950540078 |
| C | -0.93174405362692 | 1.11529106819802  | -0.31157035929899 |
| F | -3.23535000607236 | 1.72446579722485  | -0.24238329749689 |
| H | -2.40591233339291 | 0.89168496968808  | -1.87091167401656 |
| N | -2.66491614456652 | -0.73824959650747 | 1.06251527856096  |
| H | -2.18621367594310 | -1.33586523024437 | -0.87040829091796 |
| H | -3.82788632597963 | -0.73500298553298 | -0.69243370955664 |
| C | -0.76458218911434 | 0.80397406887780  | 1.17066525660020  |
| C | -1.30200302325003 | -0.56358442211171 | 1.54737245525826  |
| F | -1.44240971630878 | 1.76020125137633  | 1.92714161239182  |
| H | 0.28863507664476  | 0.86286155909884  | 1.44934636154273  |
| H | -0.76528579535657 | 2.18531258068304  | -0.44853938064676 |
| C | 0.09932225760257  | 0.35257209812774  | -1.14345355021031 |
| H | -1.28417279523310 | -0.68489243631788 | 2.62506401382501  |
| H | -0.66829669192542 | -1.33303184647829 | 1.10082563396203  |
| C | -3.65128349248099 | -0.94961553273534 | 1.93608739520331  |
| O | -3.51835002550347 | -1.00979236447626 | 3.14069698294766  |
| F | -5.08258898529245 | -1.17446278946973 | 1.37470709389754  |
| F | -5.12483795283251 | -2.21833470317347 | 0.54121775746967  |
| F | -5.54266406714482 | -0.10416816865208 | 0.72314344700584  |
| F | -5.91358286276152 | -1.42452870421205 | 2.37419181968511  |
| H | -0.03771639633852 | 0.56286853786931  | -2.20379198430692 |
| H | 0.02663190934449  | -0.72700773407866 | -1.00742786004834 |
| H | 1.10842800969781  | 0.65405714968534  | -0.86536105940541 |

## 17\_e, Gas Phase

|   |                   |                   |                   |
|---|-------------------|-------------------|-------------------|
| C | -2.26227574036423 | 0.73881746422458  | -0.88374538602330 |
| C | -2.71886817123230 | -0.64001984440490 | -0.42819060672577 |
| C | -0.87978385594319 | 1.09759657020430  | -0.35248177318771 |
| H | -2.99781133379667 | 1.48894928933516  | -0.57647007632560 |
| F | -2.22152685194332 | 0.74489253815171  | -2.26510800889083 |
| N | -2.62039708212977 | -0.72651029730603 | 1.01914016950353  |
| H | -2.06940102954547 | -1.39497558459310 | -0.87998495040706 |
| H | -3.74467805535890 | -0.82710190015501 | -0.72995880398859 |
| C | -0.79659745665011 | 0.84830530108440  | 1.14802961127201  |
| C | -1.27794198894597 | -0.54426866521646 | 1.52826380993611  |
| H | -1.38293407354753 | 1.59455830635602  | 1.69447298309203  |
| F | 0.51834307439549  | 0.97370171975125  | 1.55106637574571  |
| C | -0.50878974570637 | 2.5322469176418   | -0.69471304668662 |
| H | -0.17257403681320 | 0.40651044372348  | -0.82557179096800 |
| H | -1.22262432635485 | 3.22478685484644  | -0.24295877199553 |
| H | -0.51981553889700 | 2.68762318365756  | -1.77182596268090 |
| H | 0.48360883142075  | 2.77310246318707  | -0.31830828617348 |
| H | -1.23576752866263 | -0.67597247406742 | 2.60284025910968  |
| H | -0.62043254117430 | -1.28814227228927 | 1.06975627725122  |
| C | -3.75382213113357 | -0.84900572006565 | -0.72995880398859 |
| O | -4.85990960759970 | -0.92073866263760 | 1.28176358885690  |
| C | -3.61005289994052 | -0.90760182652256 | 3.29187422266751  |
| F | -2.85254887566705 | -1.9404090099485  | 3.67589171268722  |
| F | -4.79535827571065 | -1.03882788307808 | 3.84801823345862  |
| F | -3.04950075869891 | 0.21331730504479  | 3.76669663969758  |

## 17\_e, Benzene

|   |                   |                   |                    |
|---|-------------------|-------------------|--------------------|
| C | -2.26084720095799 | 0.75156091251873  | -0.88175959980705  |
| C | -2.72937459302933 | -0.62166321473303 | -0.42233883034150  |
| C | -0.87374909592096 | 1.09932487300713  | -0.35799787857149  |
| H | -2.98781783844220 | 1.51135522580060  | -0.58159372178018  |
| F | -2.22339060941896 | 0.74649444785699  | -2.26783934438242  |
| N | -2.63455368831228 | -0.70102634219503 | 1.02697948792359   |
| H | -2.08401954744643 | -1.38462629447267 | -0.86546183788806  |
| H | -3.75485015146466 | -0.80072884347253 | -0.72863103935006  |
| C | -0.80243400882603 | 0.86376451847437  | 1.14451521329583   |
| C | -1.28943102923609 | -0.52352296950997 | 1.53533527746133   |
| H | -1.38286573579397 | 1.62009494453222  | 1.68149128684243   |
| F | 0.51536936672162  | 0.98278592113738  | 1.55474405667670   |
| C | -0.48716837930757 | 2.52700692327184  | -0.71267792112758  |
| H | -0.17460952536198 | 0.39427835965391  | -0.82198822245153  |
| H | -1.19460409268987 | 3.23052718102836  | -0.268298020142295 |
| H | -0.49267411126497 | 2.6724333883729   | -1.791466161626072 |
| H | 0.50794149146807  | 2.76056779458678  | -0.33818933511017  |
| H | -1.24708647769990 | -0.64553850128472 | 2.61084594396351   |
| H | -0.63892033141049 | -1.27518568313383 | 1.08088916161124   |
| C | -3.75495631348860 | -0.86784404338163 | 1.75319762509612   |
| O | -4.86528406129698 | -0.97467723853928 | 1.29360221818023   |
| C | -3.60916413839766 | -0.93431171729347 | 3.29796935491277   |
| F | -2.83786815242051 | -1.95793575305056 | 3.67631591215435   |
| F | -4.79604535902148 | -1.09265808035914 | 3.85110917387309   |
| F | -3.07305641698072 | 0.19035424162026  | 3.78668118324252   |

## 17\_e, Dichloromethane

|   |                   |                   |                   |
|---|-------------------|-------------------|-------------------|
| C | -2.26005138548997 | 0.76249982343587  | -0.87984440965489 |
| C | -2.73811171498634 | -0.60603462540815 | -0.41692334868301 |
| C | -0.86898451329988 | 1.10037251678961  | -0.36252187854228 |
| H | -2.97949181217428 | 1.53007909022575  | -0.58383997791678 |
| F | -2.22675093609698 | 0.74908402564170  | -2.26915846633516 |
| N | -2.64590440193038 | -0.68074294371312 | 1.03386169322434  |
| H | -2.09658392545856 | -1.37549866084474 | -0.85358663257000 |
| C | -3.76361872724621 | -0.77812659318313 | -0.72604953191488 |
| C | -0.80739683207889 | 0.87760968640246  | 1.14177011324619  |
| C | -1.29899187943100 | -0.50511218027933 | 1.54201306872680  |
| H | -1.38413589794308 | 1.64203012306822  | 1.66992090980118  |
| F | 0.51182278515175  | 0.99250653810201  | 1.5826538695740   |
| C | -0.46832935935773 | 2.52130795097515  | -0.72882073695414 |
| H | -0.17723578642558 | 0.38299960396170  | -0.81828956573705 |
| H | -1.16969242163855 | 3.23496466772837  | -0.29136494589560 |
| H | -0.46944261990842 | 2.65733265490551  | -1.80900388313102 |
| H | 0.52902920867441  | 2.74821477916856  | -0.35580512313636 |
| H | -1.25735149673583 | -0.61806335602908 | 2.61839120499461  |
| H | -0.65345765271645 | -1.26327600952880 | 1.09226416122935  |
| C | -3.75566320636958 | -0.88208068773488 | 1.75814600558245  |

|   |                   |                   |                  |
|---|-------------------|-------------------|------------------|
| O | -4.86846959194319 | -1.01527457463835 | 1.30200243522679 |
| C | -3.60823999003564 | -0.95800644796841 | 3.30257467131187 |
| F | -2.82392298768760 | -1.97318833449219 | 3.67409788773493 |
| F | -4.79583285169419 | -1.14208641987179 | 3.85250514001831 |
| F | -3.09465200317779 | 0.16931937328708  | 3.80483582369358 |

|   |                   |                   |                   |
|---|-------------------|-------------------|-------------------|
| C | -0.46143350397754 | 2.51897008920827  | -0.73477822196650 |
| H | -0.17841897719578 | 0.37877443185442  | -0.81693785904850 |
| H | -1.16036467082776 | 3.23645876651007  | -0.29981504571034 |
| H | -0.46117012601199 | 2.65148608966034  | -1.81545258313194 |
| H | 0.53679394510056  | 2.74328594625460  | -0.36238385202653 |
| H | -1.26120304394298 | -0.60775525801992 | 2.62132268528610  |
| H | -0.65835569758870 | -1.25884459786242 | 1.09692030815375  |
| C | -3.75581891532618 | -0.88687870845576 | 1.75984282269324  |
| O | -4.86936762353586 | -1.02839932426249 | 1.30460970611822  |
| C | -3.60795660372487 | -0.96671650013582 | 3.30409257115482  |
| F | -2.81797108532256 | -1.97812536419977 | 3.67280945666930  |
| F | -4.79558833369448 | -1.16154834231113 | 3.85254103345760  |
| F | -3.10376030145440 | 0.16178200524647  | 3.81168380436035  |

### 17\_e, Chloroform

|   |                   |                   |                   |
|---|-------------------|-------------------|-------------------|
| C | -2.26020050948991 | 0.75896144835220  | -0.88055835696760 |
| C | -2.73539176412263 | -0.61099806554081 | -0.41873050461798 |
| C | -0.87046661249648 | 1.10011696807900  | -0.36105114346051 |
| H | -2.98211753557322 | 1.52414371600487  | -0.58363886323512 |
| F | -2.22526217458836 | 0.74798579160207  | -2.26891439996092 |
| N | -2.64243385730826 | -0.68698231240581 | 1.03160521010573  |
| H | -2.09267702009015 | -1.37851236757578 | -0.85729933701288 |
| H | -3.76088129025863 | -0.78524266915066 | -0.72703659234809 |
| C | -0.80578538541038 | 0.87307000257962  | 1.14265495721440  |
| C | -1.29600190044356 | -0.51109567351499 | 1.53974638193695  |
| H | -1.38347640507637 | 1.63496073342969  | 1.67379850439793  |
| F | 0.51309992584259  | 0.98907649976473  | 1.55709317910174  |
| C | -0.47447818498366 | 2.52333482615431  | -0.72345012976274 |
| H | -0.17624133452954 | 0.38679009455609  | -0.81949862863633 |
| H | -1.17790775068838 | 3.23359116505414  | -0.28368438309177 |
| H | -0.47694745939779 | 2.66251481038117  | -1.80318151245748 |
| H | 0.52214626832693  | 2.75246950496694  | -0.34995555022938 |
| H | -1.25403546070995 | -0.62718544827639 | 2.61582142326292  |
| H | -0.64906749806897 | -1.26720964797198 | 1.08825331998970  |
| C | -3.75546642124542 | -0.87796755912934 | 1.75659590397747  |
| O | -4.86752872207304 | -1.00351002717176 | 1.29951035139400  |
| C | -3.60848940170456 | -0.95019032546156 | 3.30117318200070  |
| F | -2.82876060801290 | -1.96830317436304 | 3.67526176230198  |
| F | -4.79594484929402 | -1.12528636755346 | 3.85231398799116  |
| F | -3.08714404860333 | 0.17629807719074  | 3.79861123810614  |

### 17\_e, DMSO

|   |                   |                   |                   |
|---|-------------------|-------------------|-------------------|
| C | -2.25991743443316 | 0.76615470704262  | -0.87914916518403 |
| C | -2.74101030271713 | -0.60084768525336 | -0.41499994980357 |
| C | -0.86750611634193 | 1.10061645070899  | -0.36400781769595 |
| H | -2.97680043914724 | 1.53625268021481  | -0.58418978316301 |
| F | -2.22825312602849 | 0.75016884737544  | -2.26940176990910 |
| N | -2.64945941861099 | -0.67437430352773 | 1.03620173566996  |
| H | -2.10086307724385 | -1.37237588859062 | -0.84984440409957 |
| H | -3.76661944960052 | -0.77061473959300 | -0.72475450462496 |
| C | -0.80893241000089 | 0.88225416629344  | 1.14085802050337  |
| C | -1.30208505929040 | -0.49889121624747 | 1.54439758230426  |
| H | -1.38451756061021 | 1.64933402109604  | 1.66602662480542  |
| F | 0.51063803867580  | 0.99586664689215  | 1.55926928145139  |
| C | -0.46198340240035 | 2.51915731848967  | -0.73429798513495 |
| H | -0.17832001475925 | 0.37911729923257  | -0.81704814444160 |
| H | -1.1611023977563  | 3.23634199140911  | -0.29912589332186 |
| H | -0.46184480598768 | 2.65195863008873  | -1.81493243110734 |
| H | 0.53617787420877  | 2.74367598939695  | -0.36186125706869 |
| H | -1.26088950236541 | -0.60858853476831 | 2.62108972186617  |
| H | -0.65794529092885 | -1.25919715431096 | 1.09655208909397  |
| C | -3.75581959196864 | -0.88651074528459 | 1.75971104948957  |
| O | -4.86928636643088 | -1.02733503372262 | 1.30438463946361  |
| C | -3.60800035757054 | -0.96601696702718 | 3.30397721185447  |
| F | -2.81839310726581 | -1.97767951943016 | 3.67292661917302  |
| F | -4.79561376017640 | -1.16006524412814 | 3.85253318699311  |
| F | -3.10311292123029 | 0.16242828364360  | 3.81112534288633  |

### 17\_e, Water

|   |                   |                   |                   |
|---|-------------------|-------------------|-------------------|
| C | -2.25990661543665 | 0.76647681419087  | -0.87907795609433 |
| C | -2.74125254367206 | -0.60040116642493 | -0.41483770210174 |
| C | -0.86737661926818 | 1.10063782239035  | -0.36413944022078 |
| H | -2.97656800542397 | 1.53678482992239  | -0.58419848137151 |
| F | -2.22840070790796 | 0.75026875881314  | -2.26942388283056 |
| N | -2.64978163909962 | -0.67381466506682 | 1.03640660364325  |
| H | -2.10119971048229 | -1.37210092942281 | -0.84949264935733 |
| H | -3.76685605568031 | -0.76997741290036 | -0.72467992807677 |
| C | -0.80908464513914 | 0.88266718733744  | 1.14077735321576  |
| C | -1.30236068642856 | -0.49834956669058 | 1.54460380601619  |
| H | -1.38457884720799 | 1.64997629198094  | 1.66567151161280  |
| F | 0.51052101324931  | 0.99617280238350  | 1.55937593955548  |

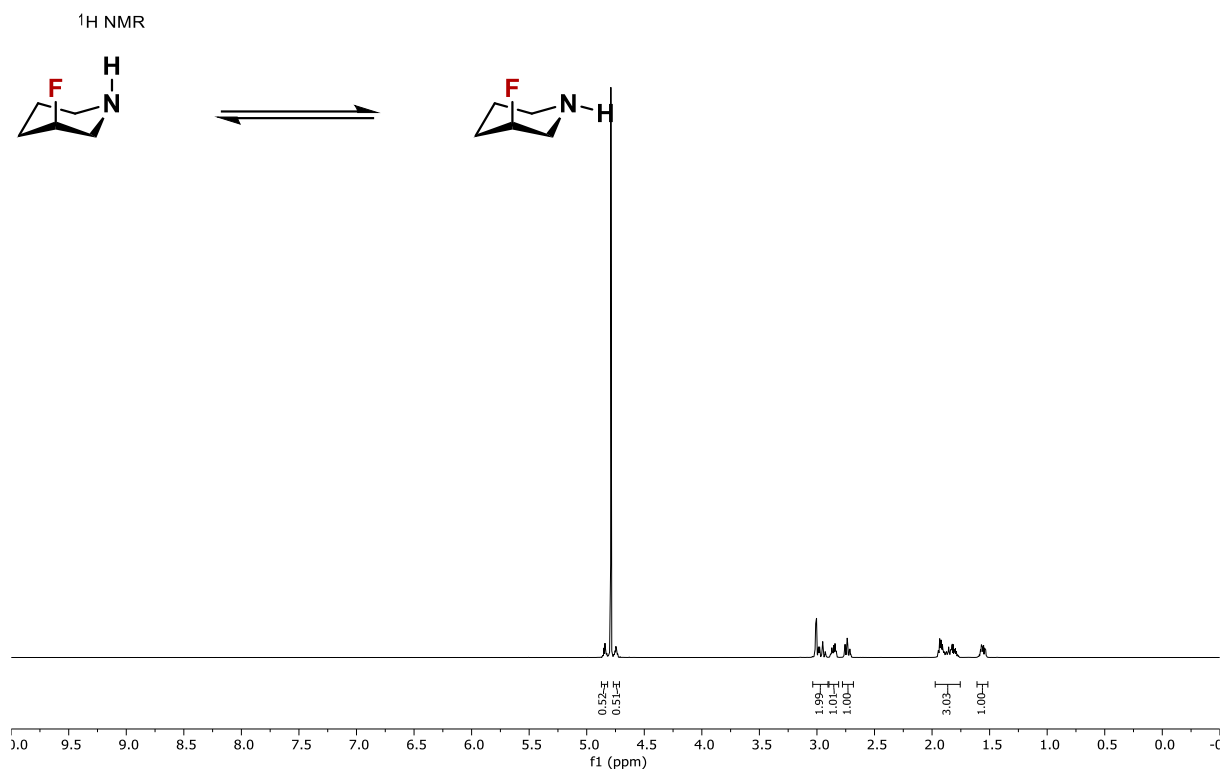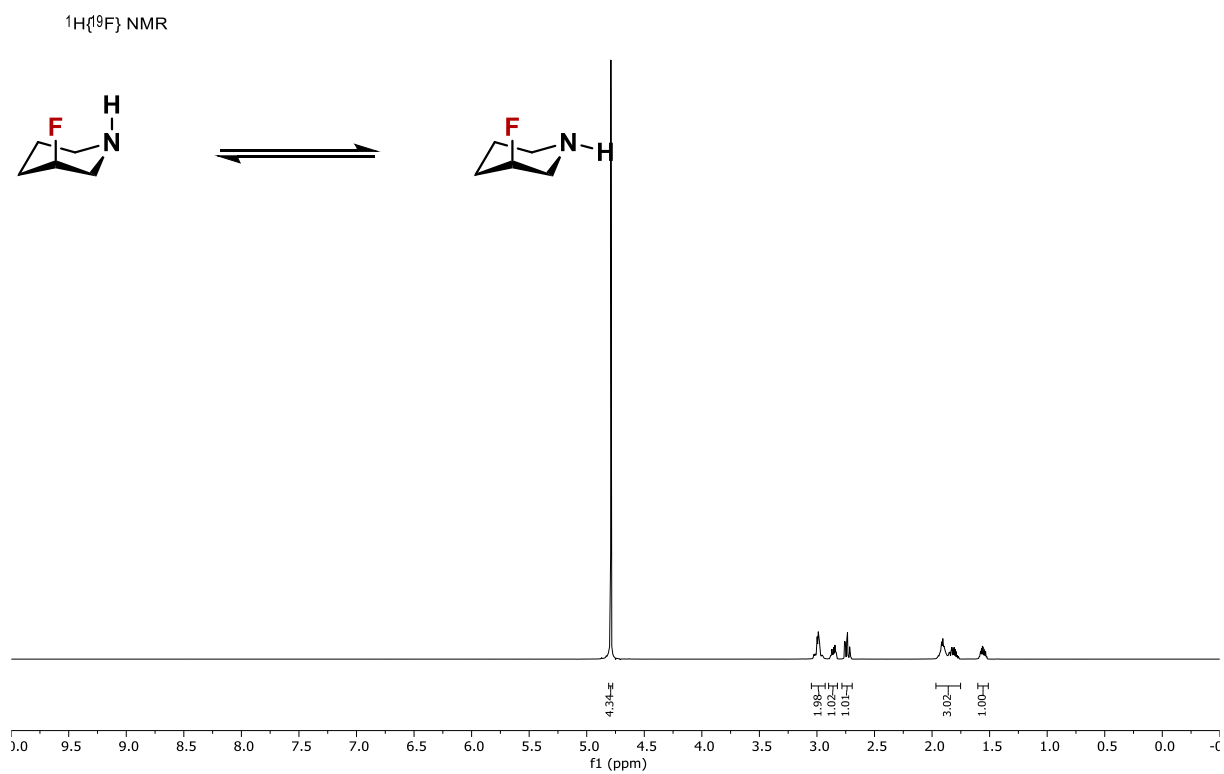

$^{13}\text{C}$  NMR

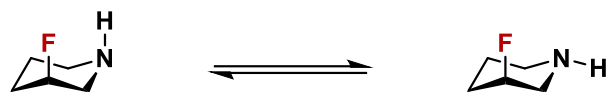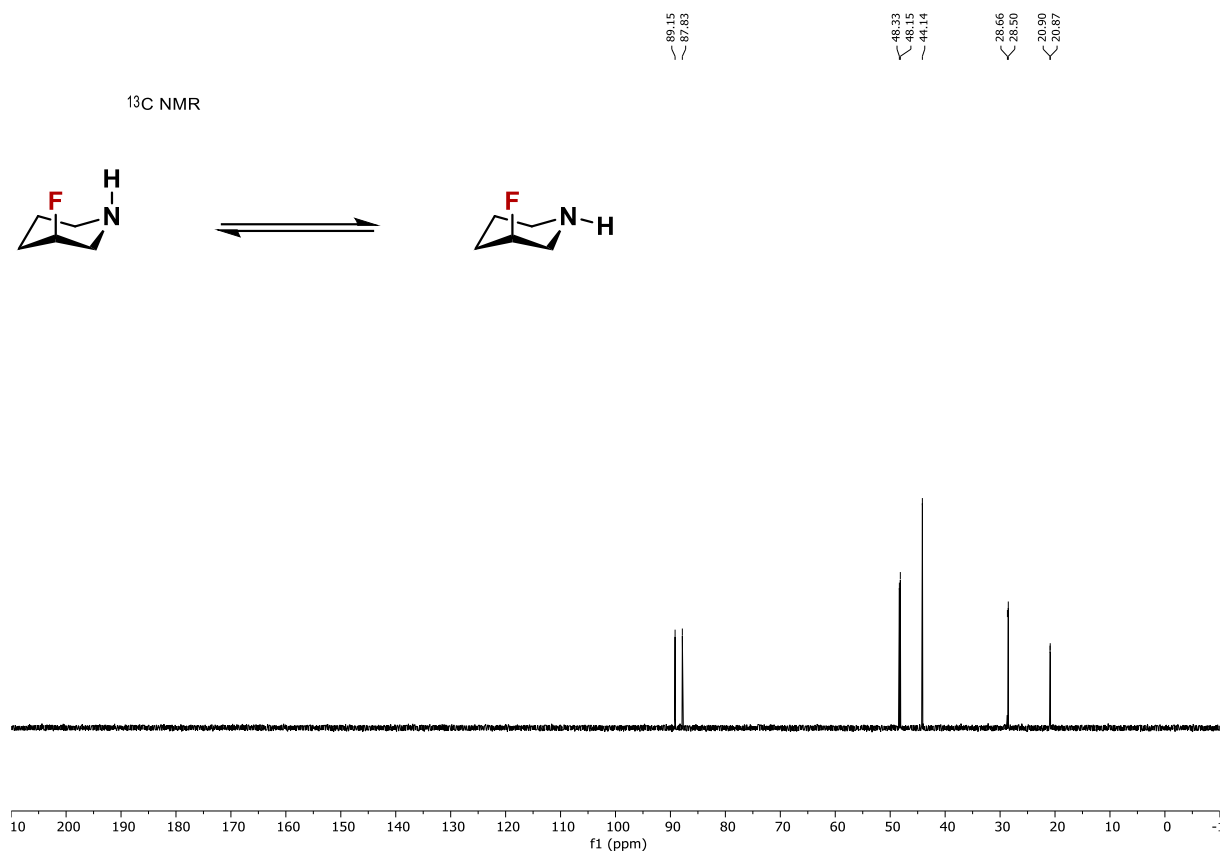

$^{13}\text{C}\{^{19}\text{F}\}$  NMR

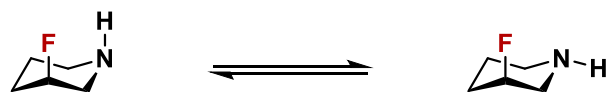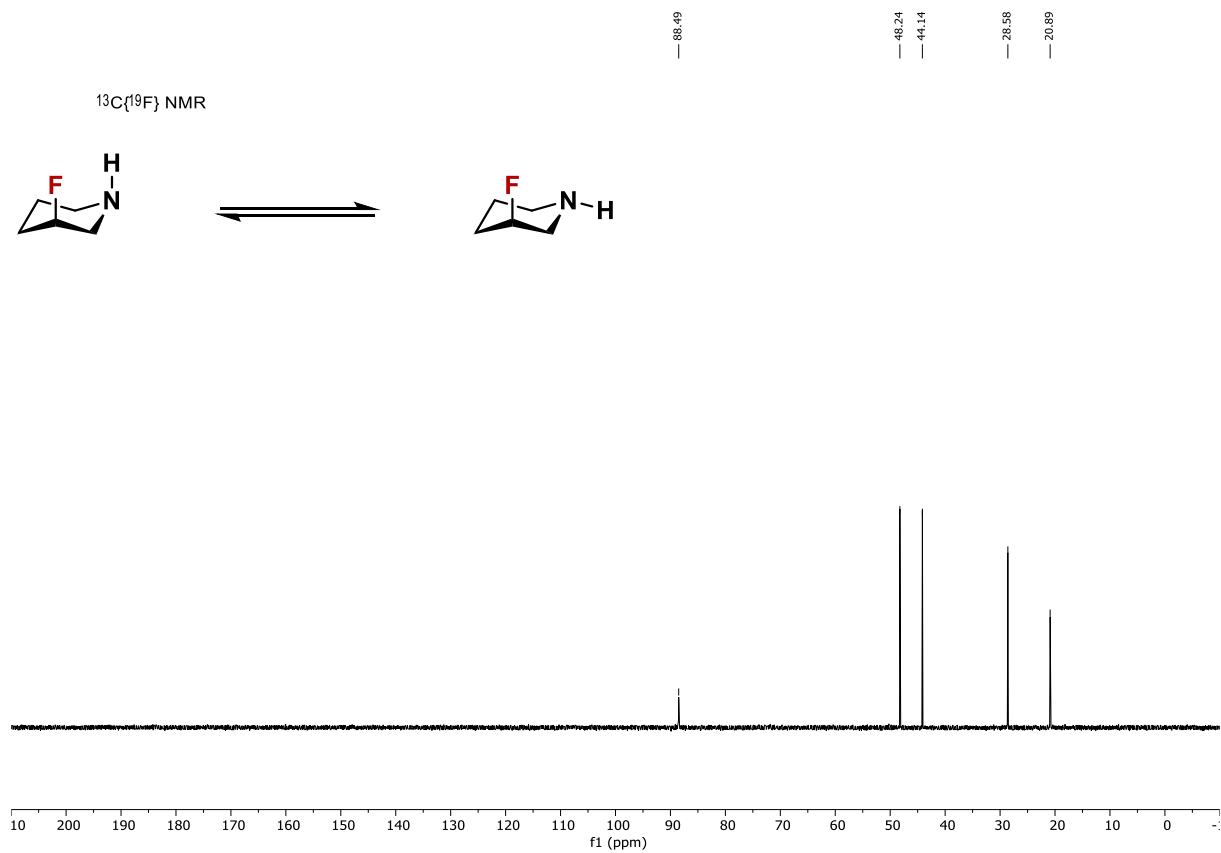



<sup>19</sup>F NMR

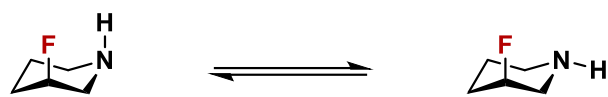

-183.33

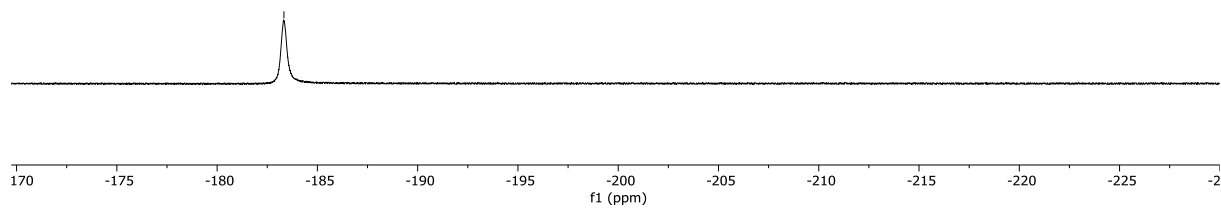

<sup>19</sup>F{<sup>1</sup>H} NMR

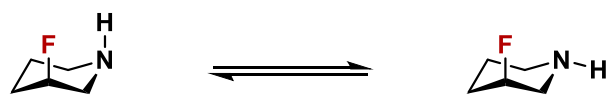

-183.33

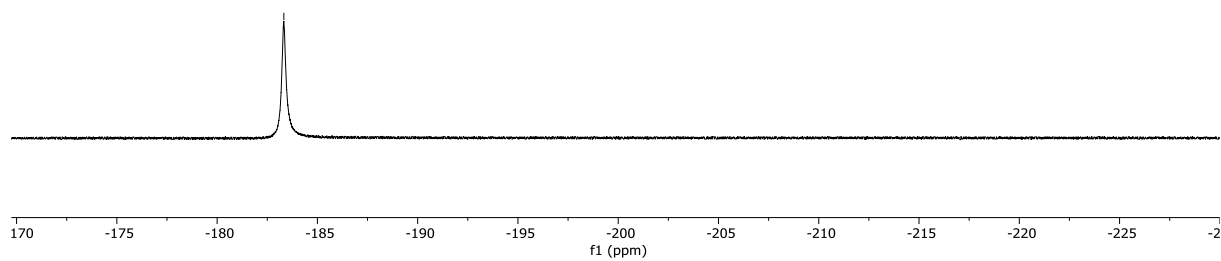

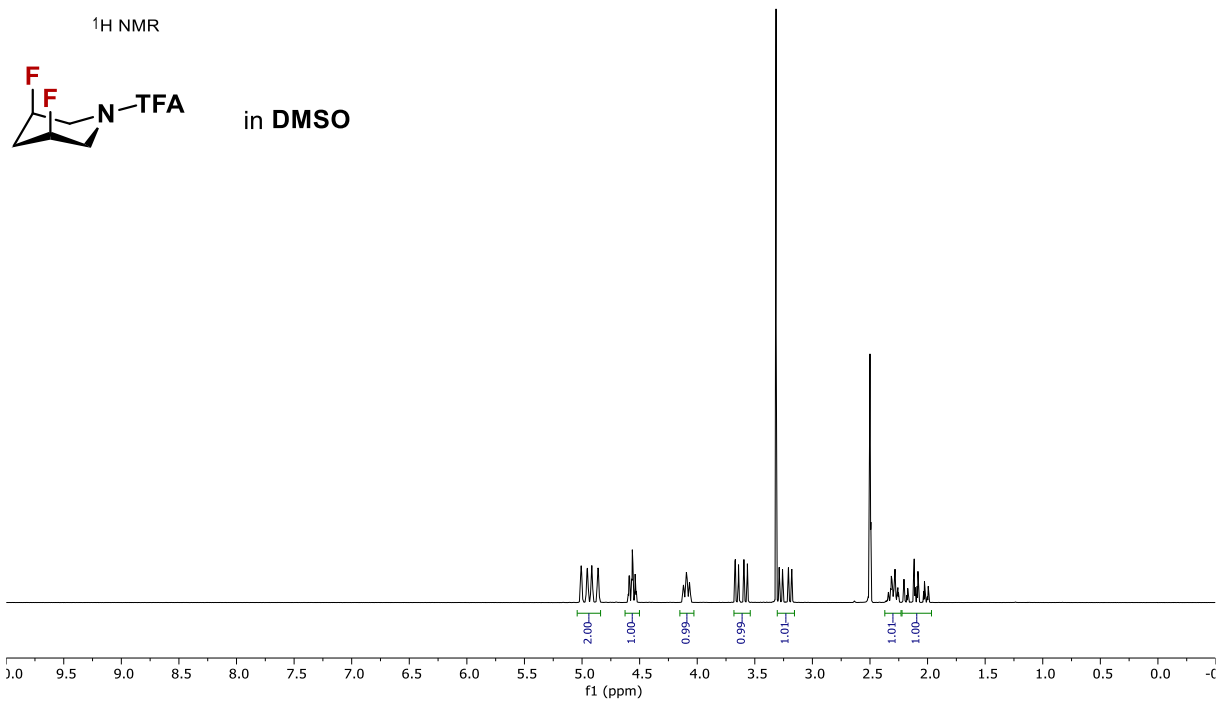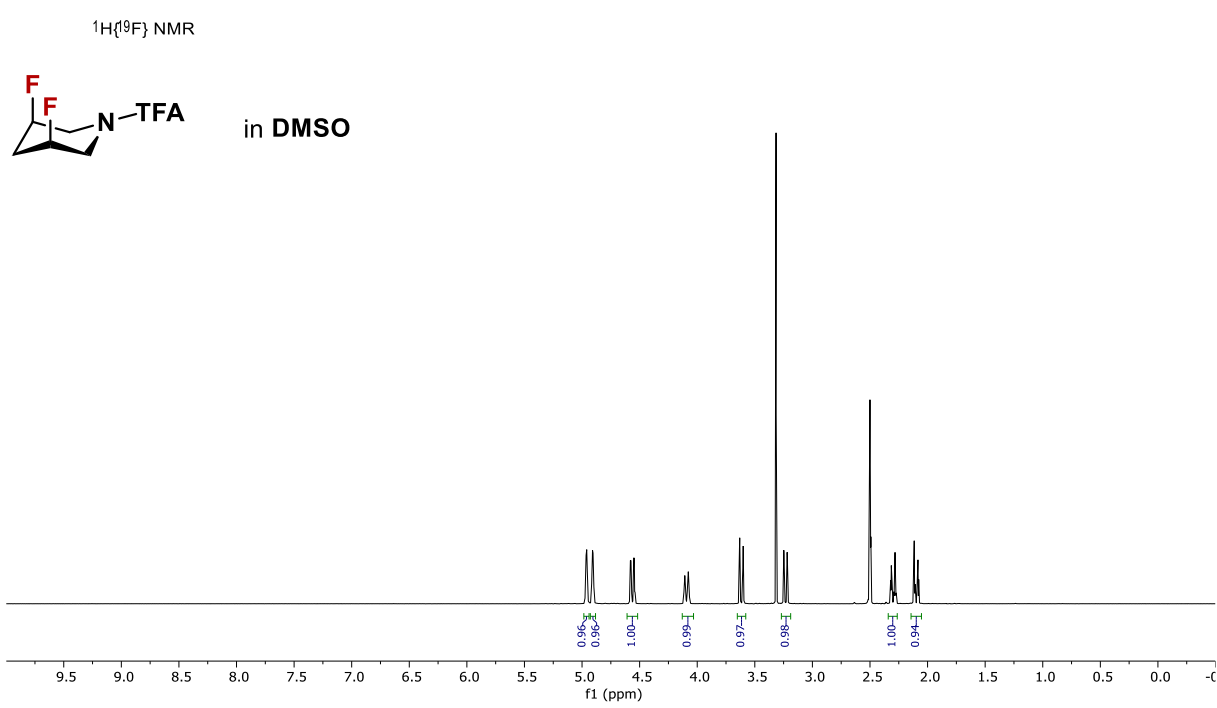

<sup>1</sup>H NMR

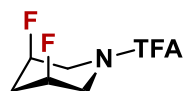

in CD<sub>2</sub>Cl<sub>2</sub>

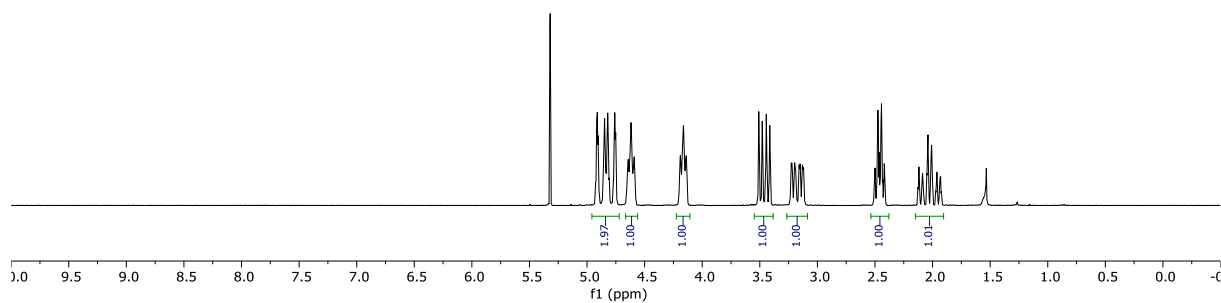

<sup>1</sup>H{<sup>19</sup>F} NMR

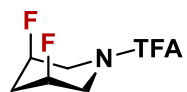

in CD<sub>2</sub>Cl<sub>2</sub>

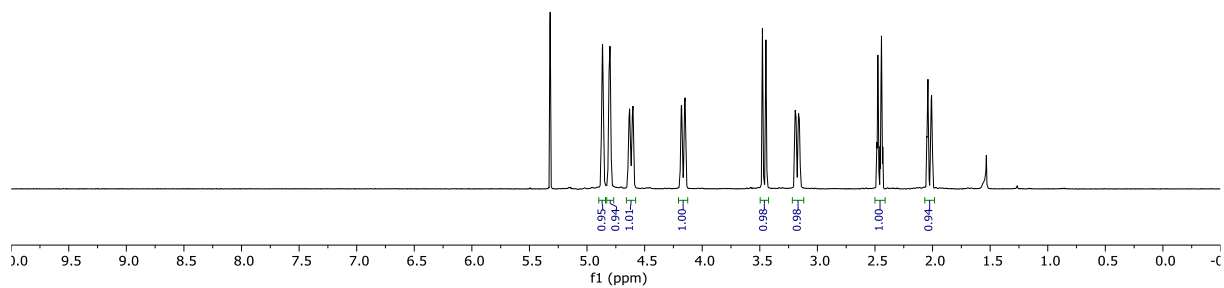

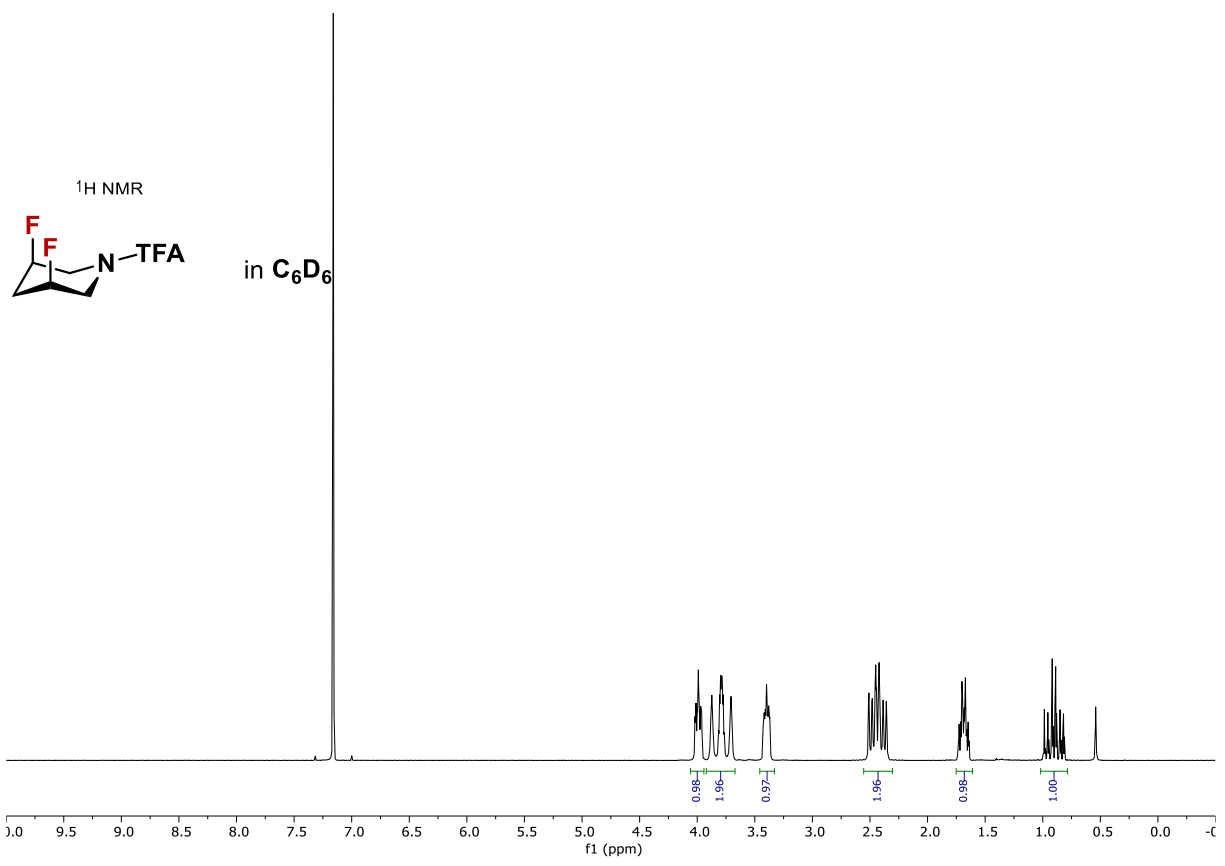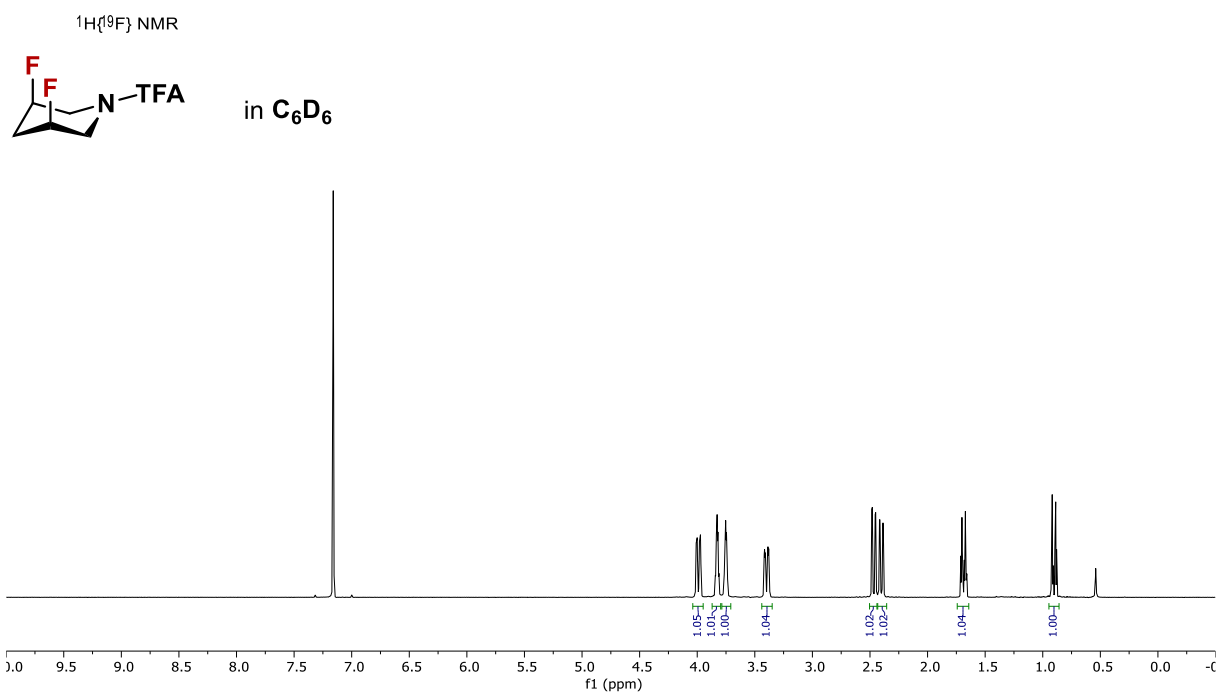

$^1\text{H}$  NMR

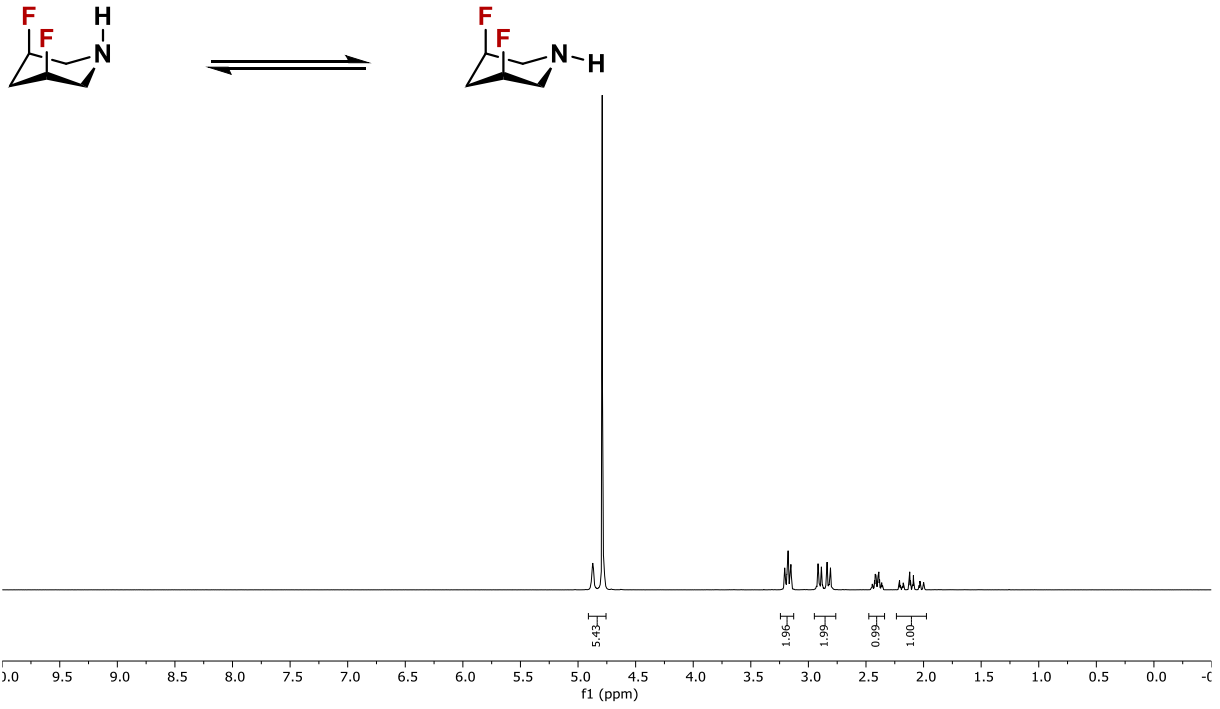

$^1\text{H}\{^{19}\text{F}\}$  NMR

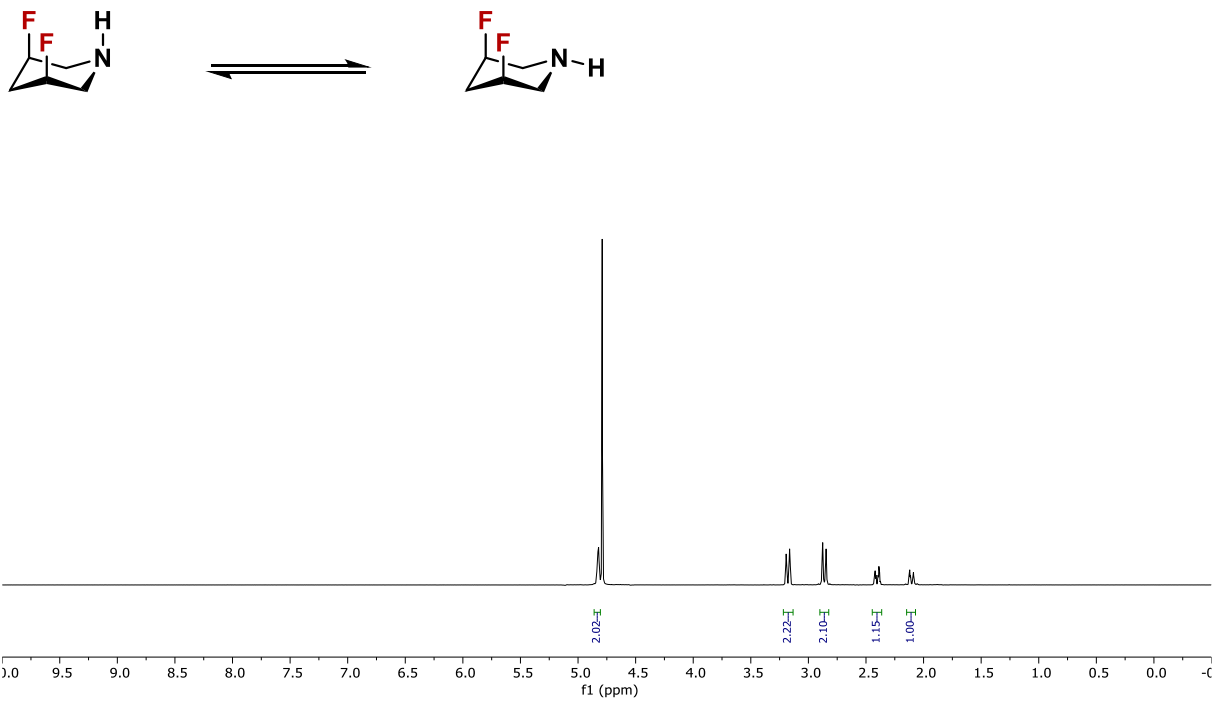

$^{13}\text{C}$  NMR

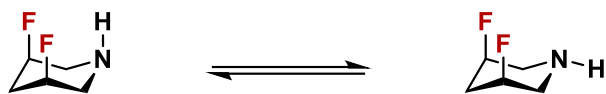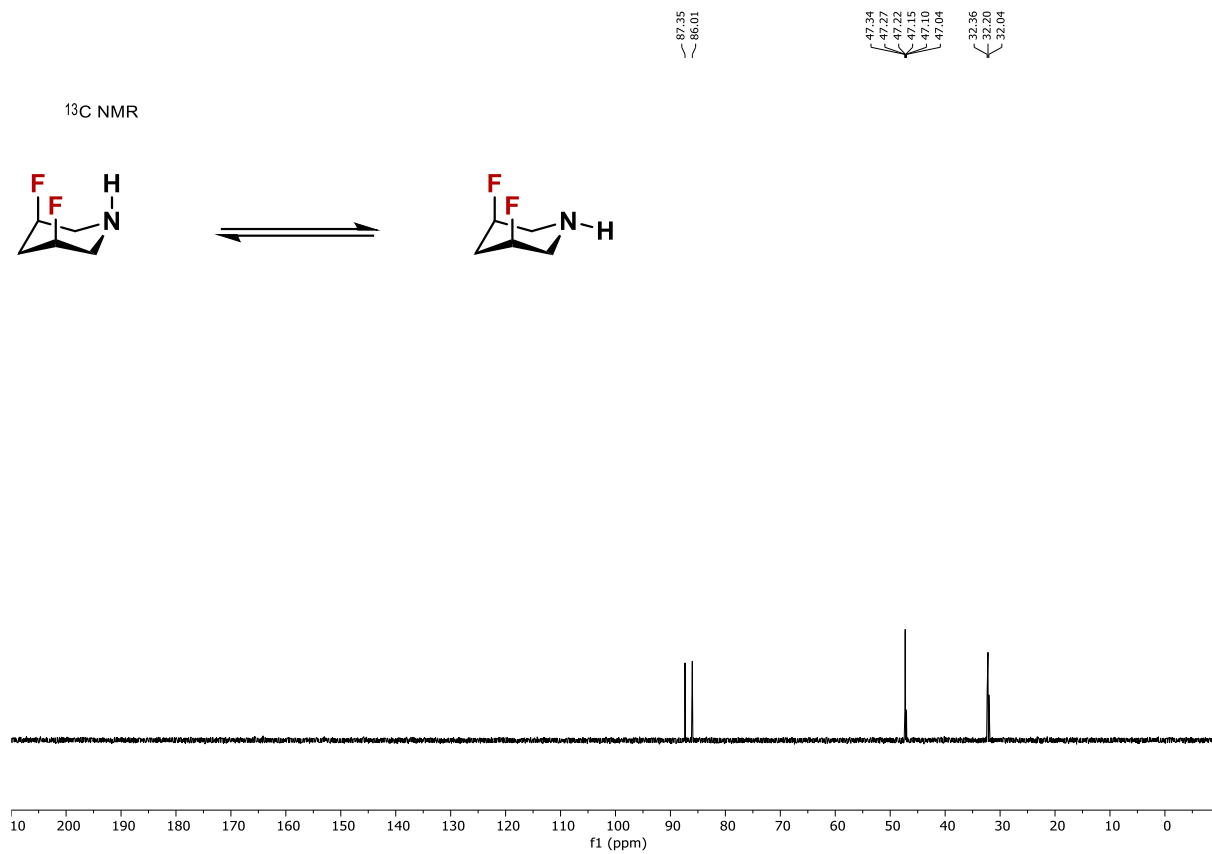

$^{13}\text{C}\{^{19}\text{F}\}$  NMR

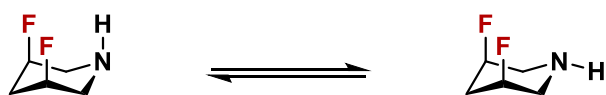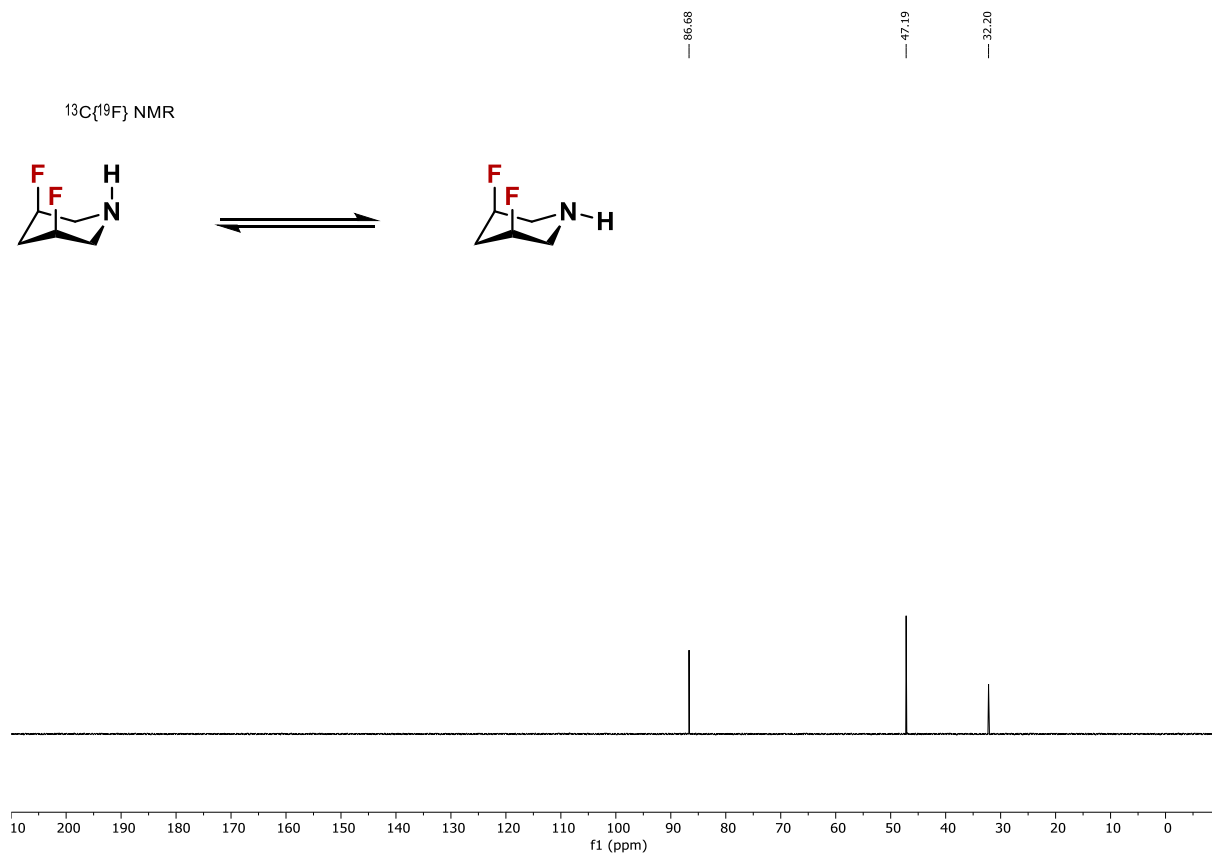

$^{19}\text{F}$  NMR

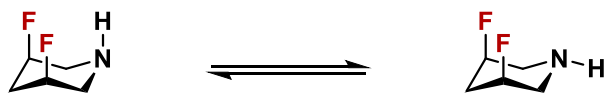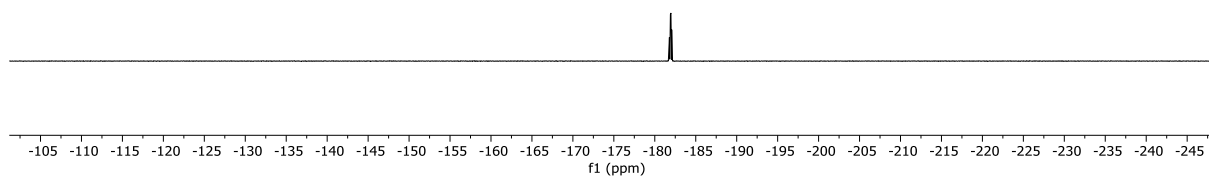

$^{19}\text{F}\{^1\text{H}\}$  NMR

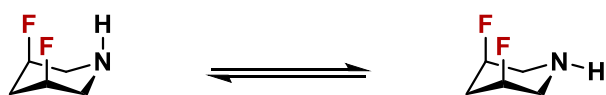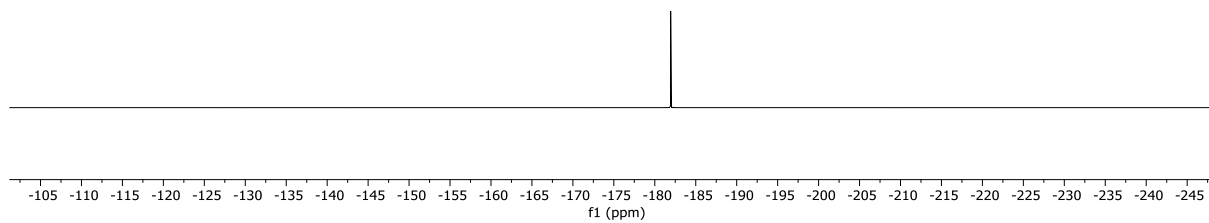

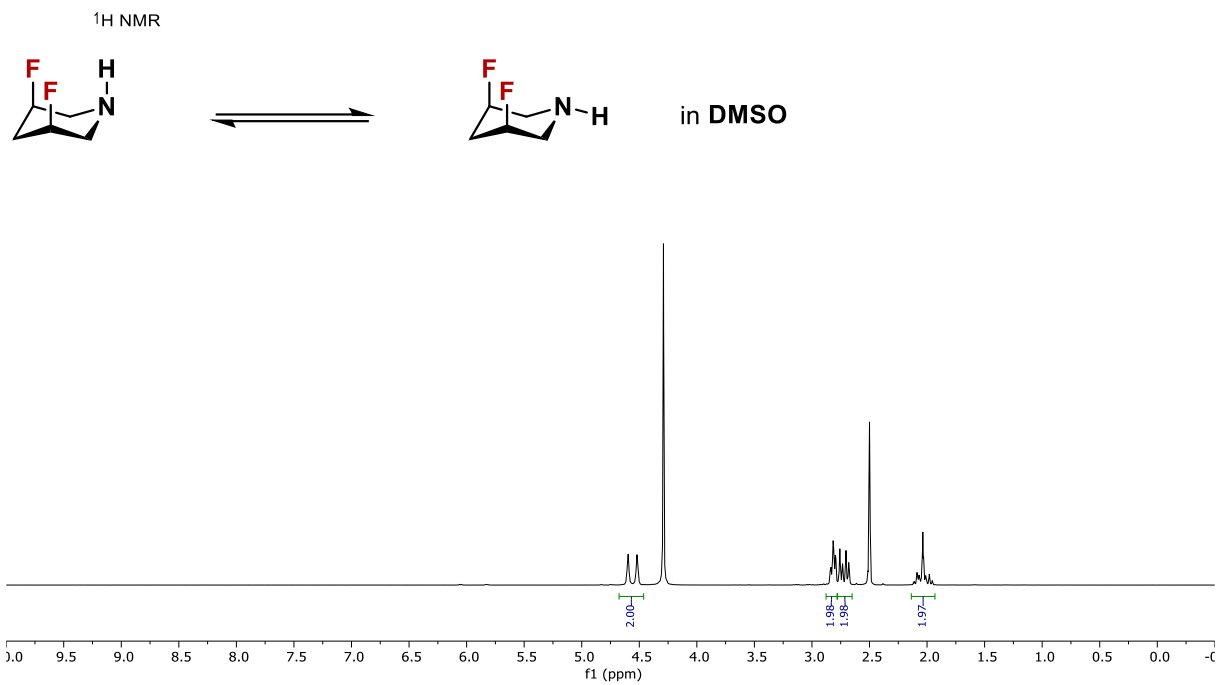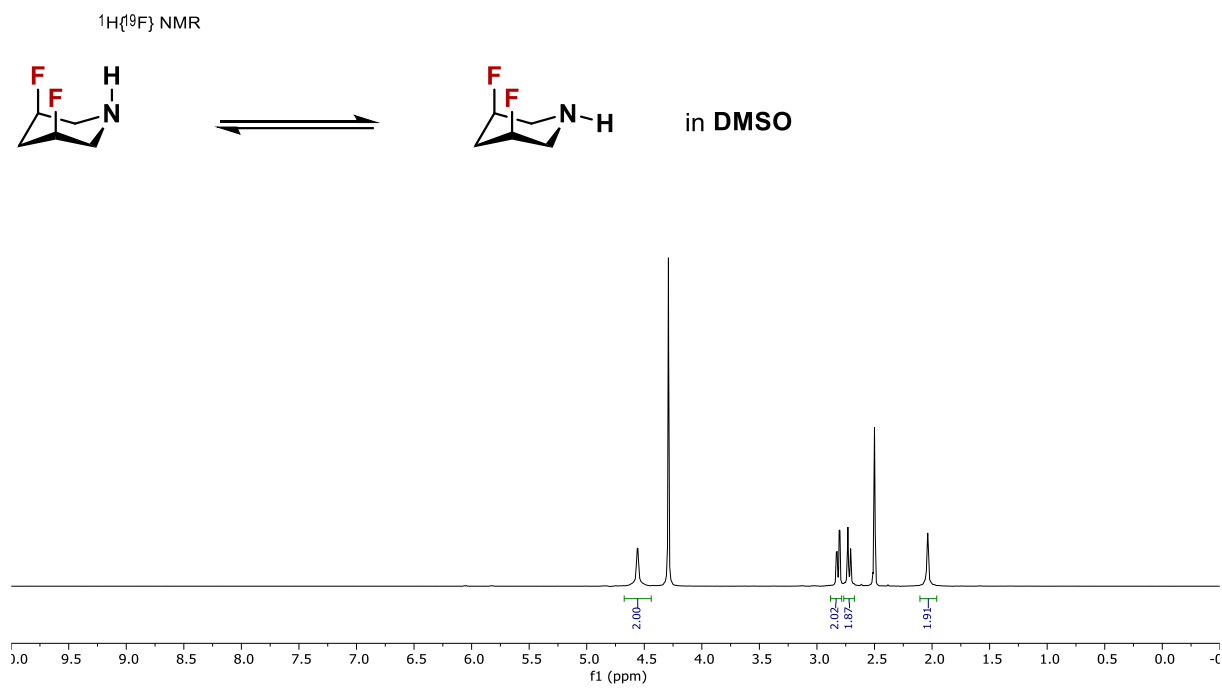



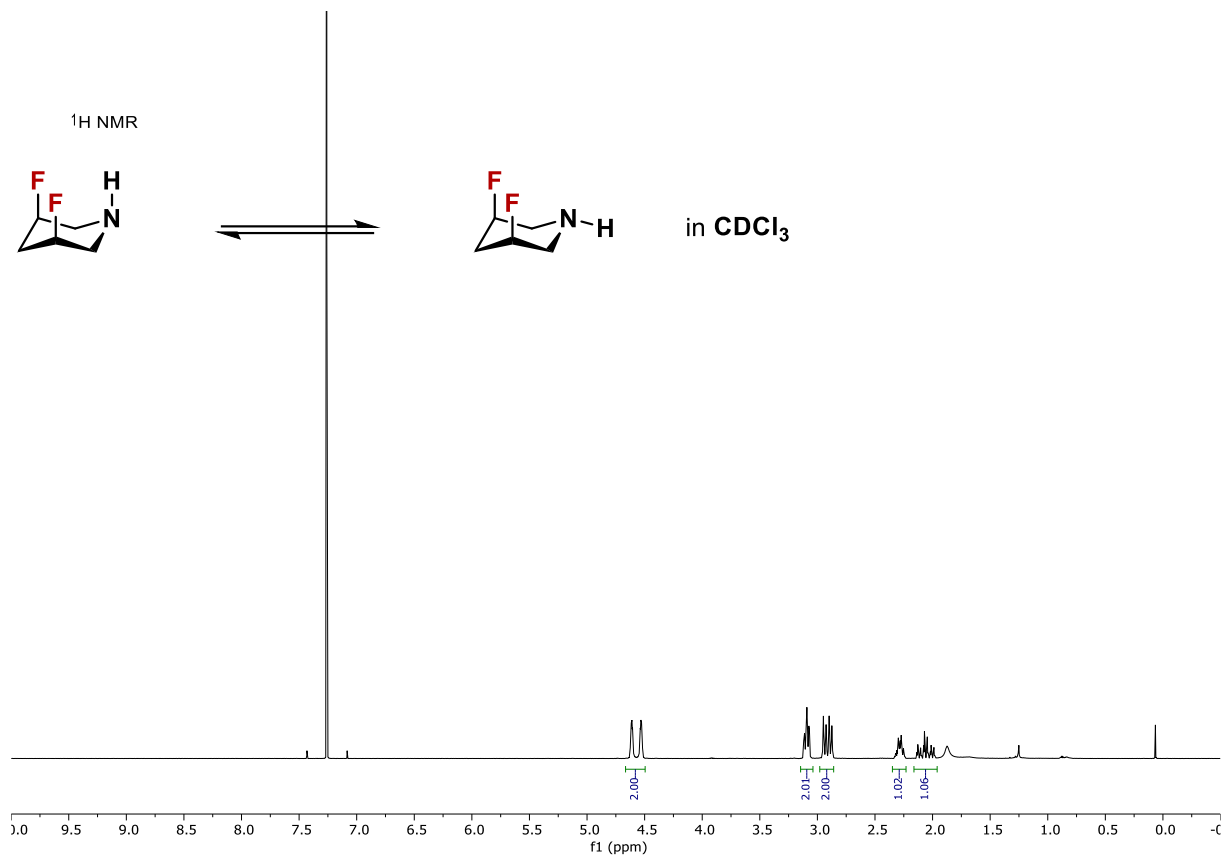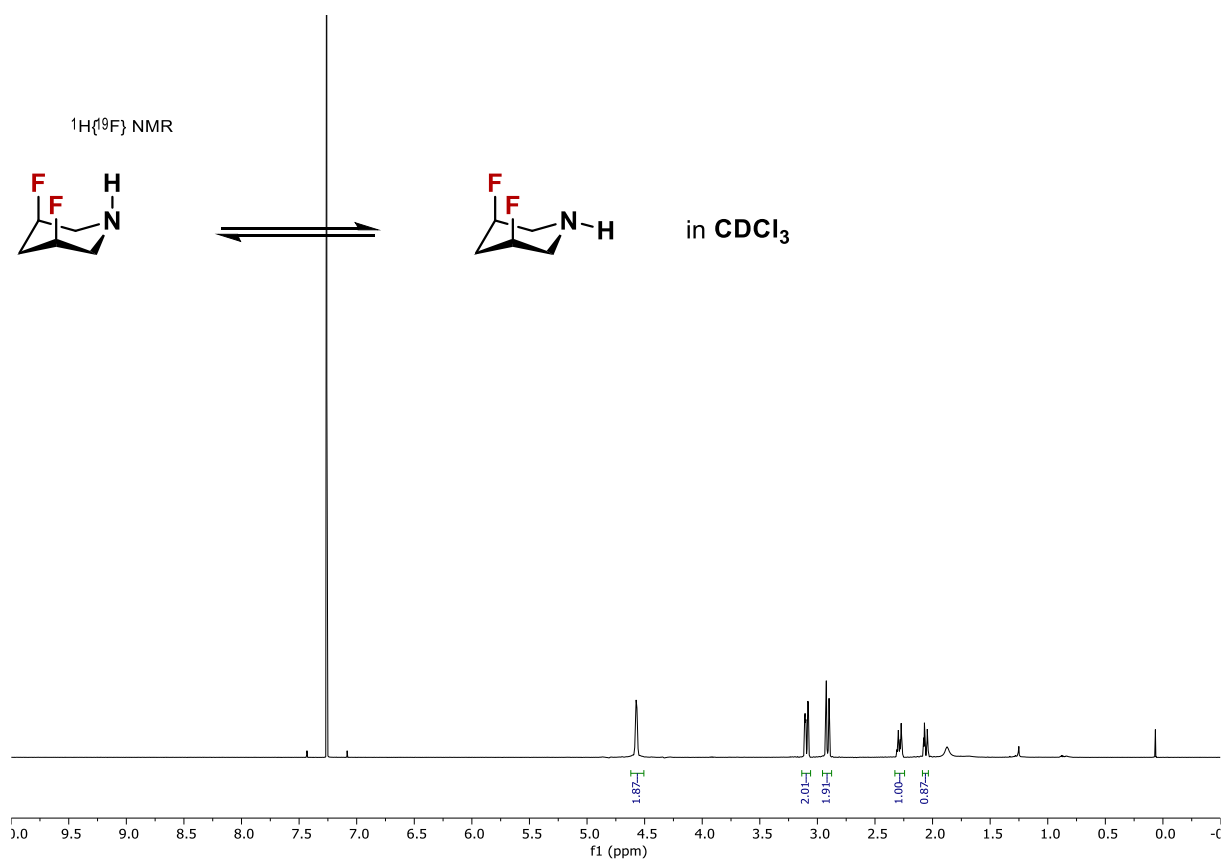

$^1\text{H}$  NMR

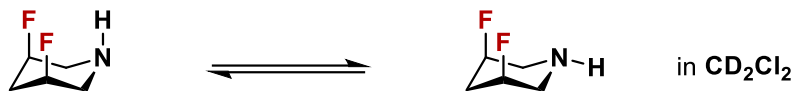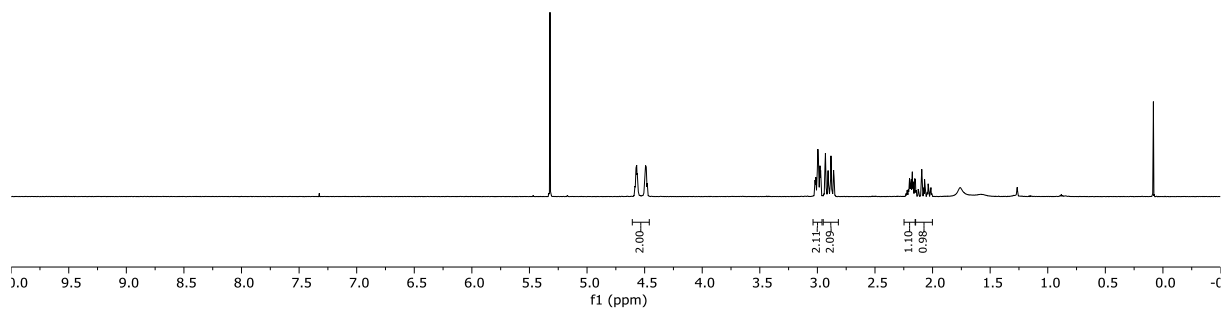

$^1\text{H}\{^{19}\text{F}\}$  NMR

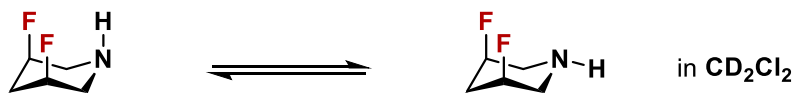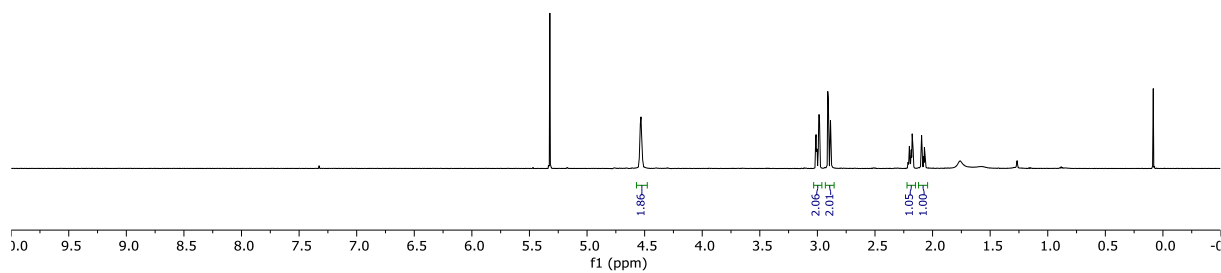

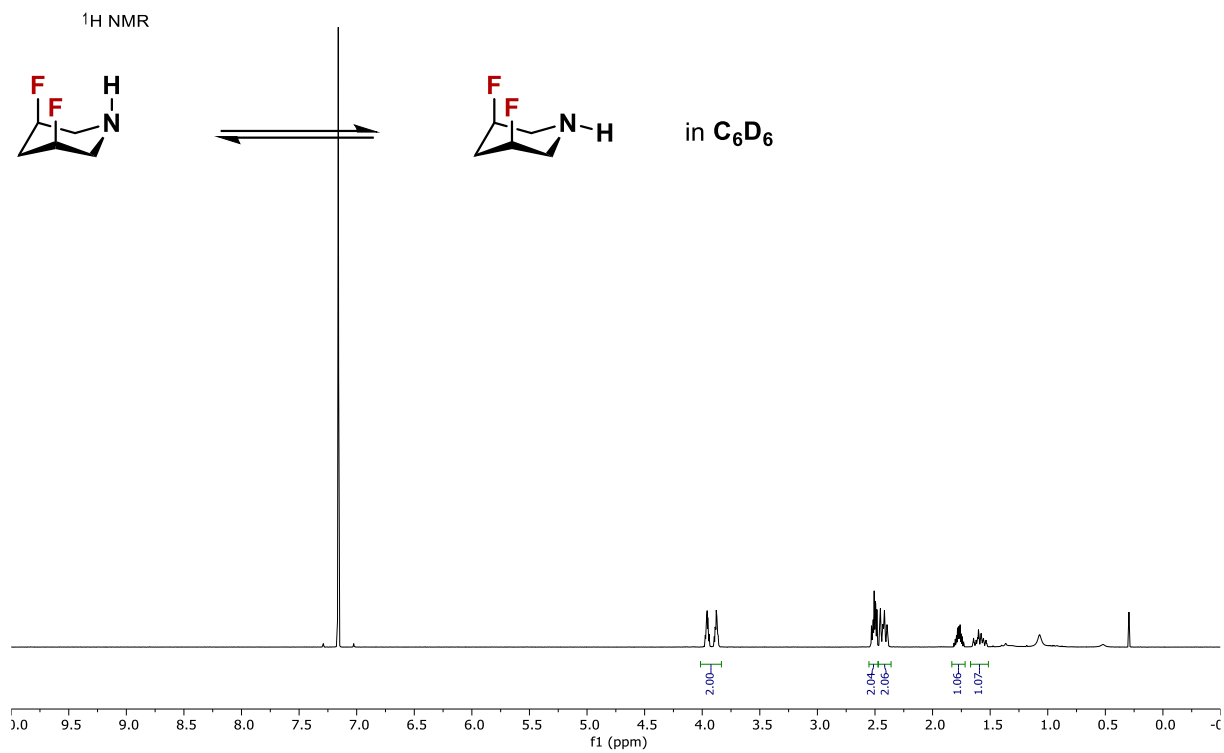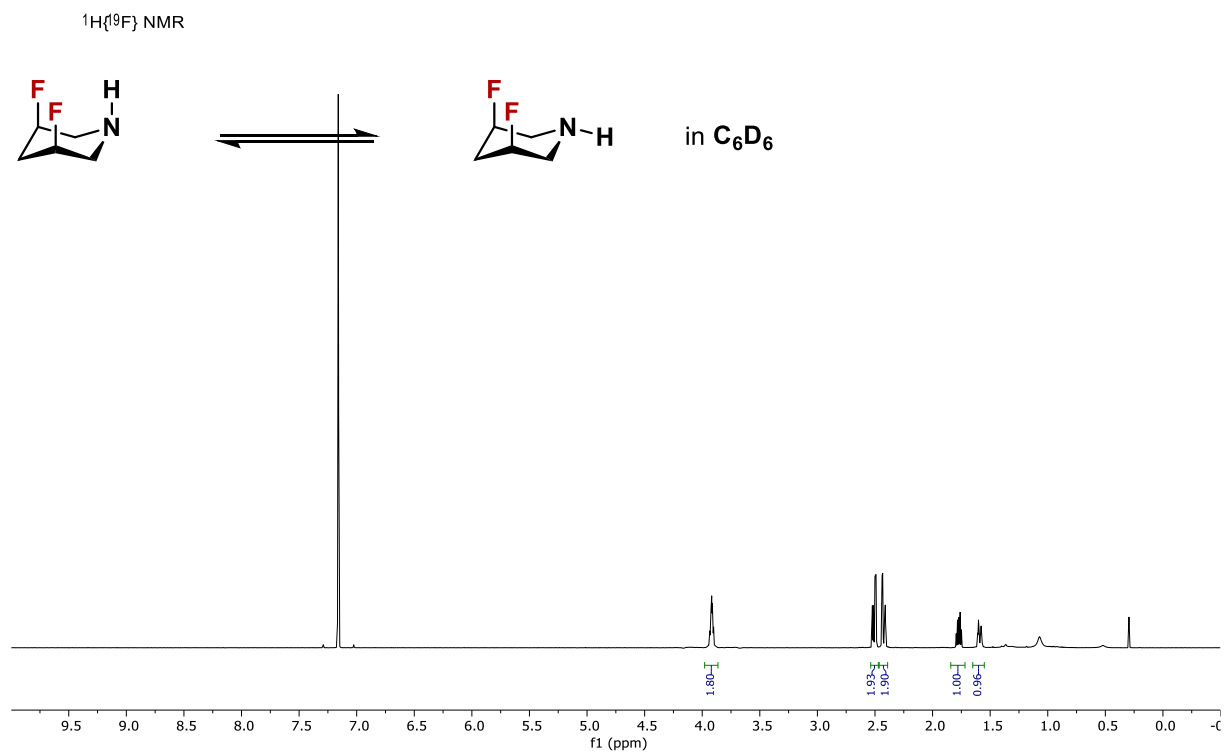

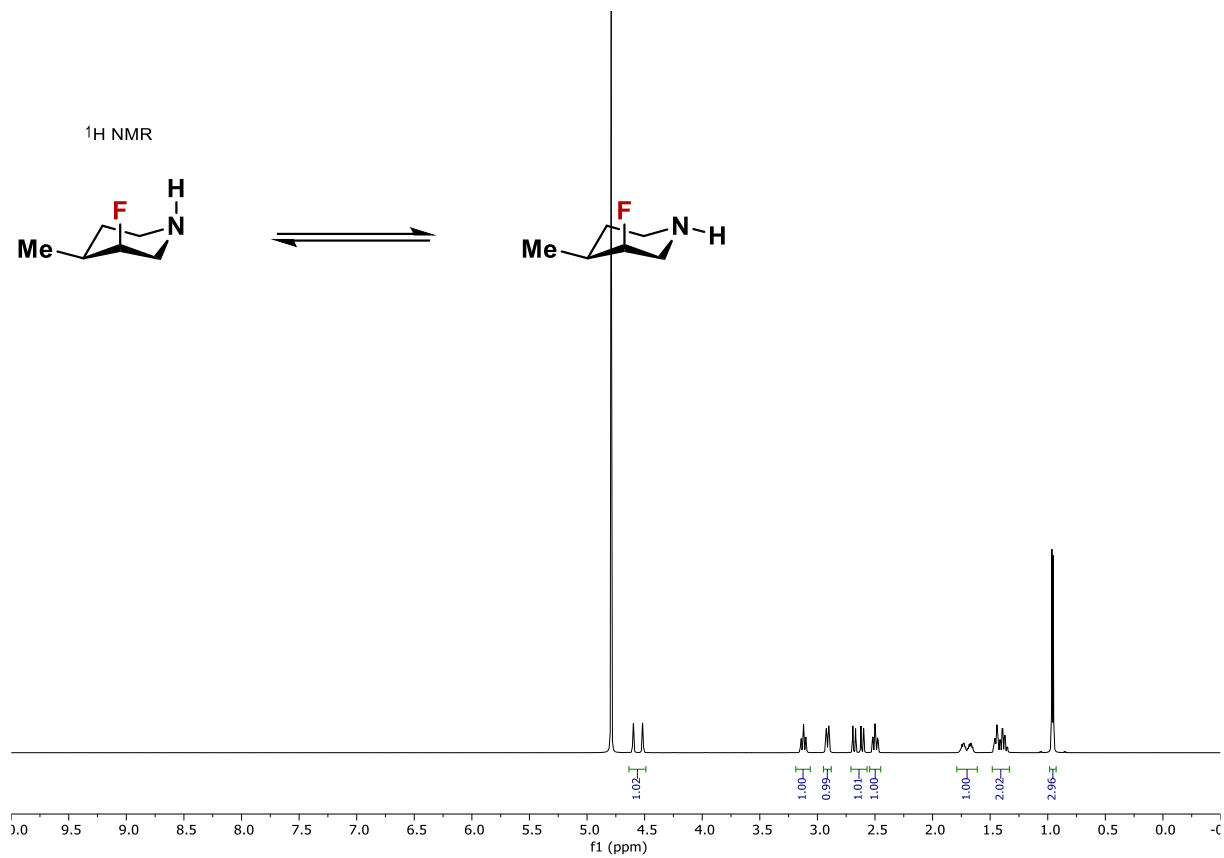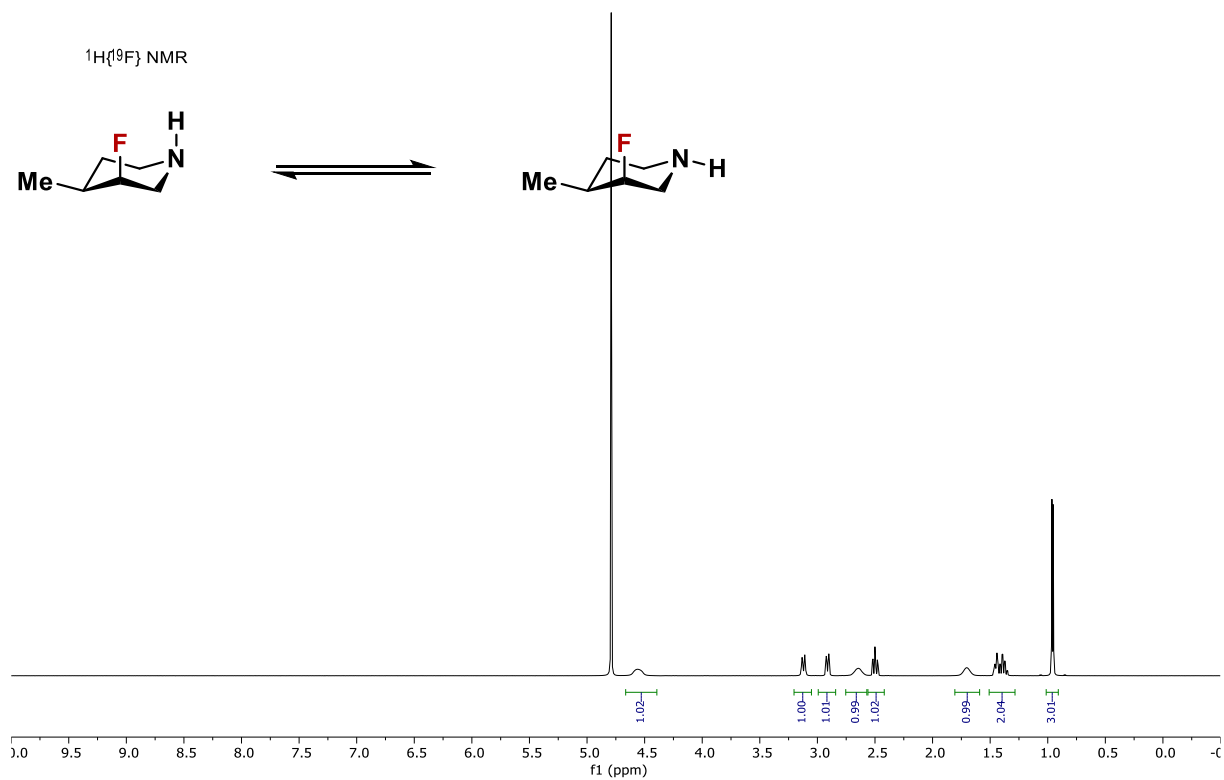

$^{13}\text{C}$  NMR

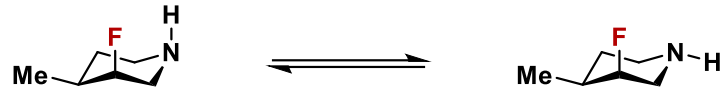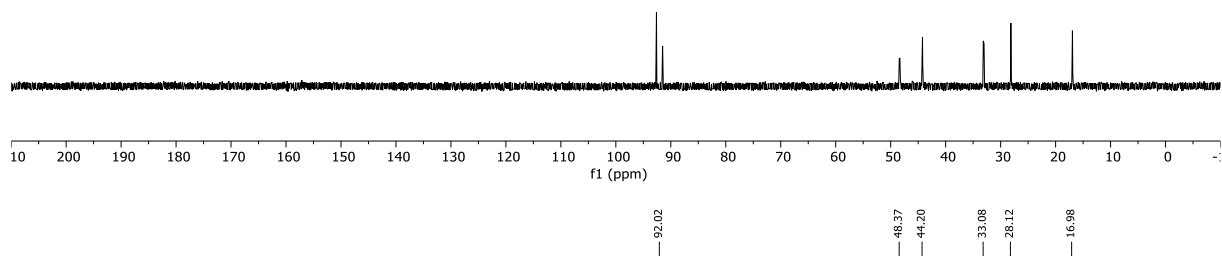

$^{13}\text{C}\{^{19}\text{F}\}$  NMR

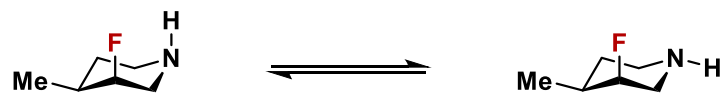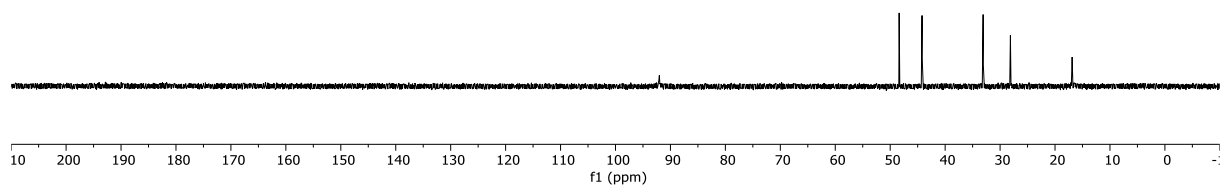

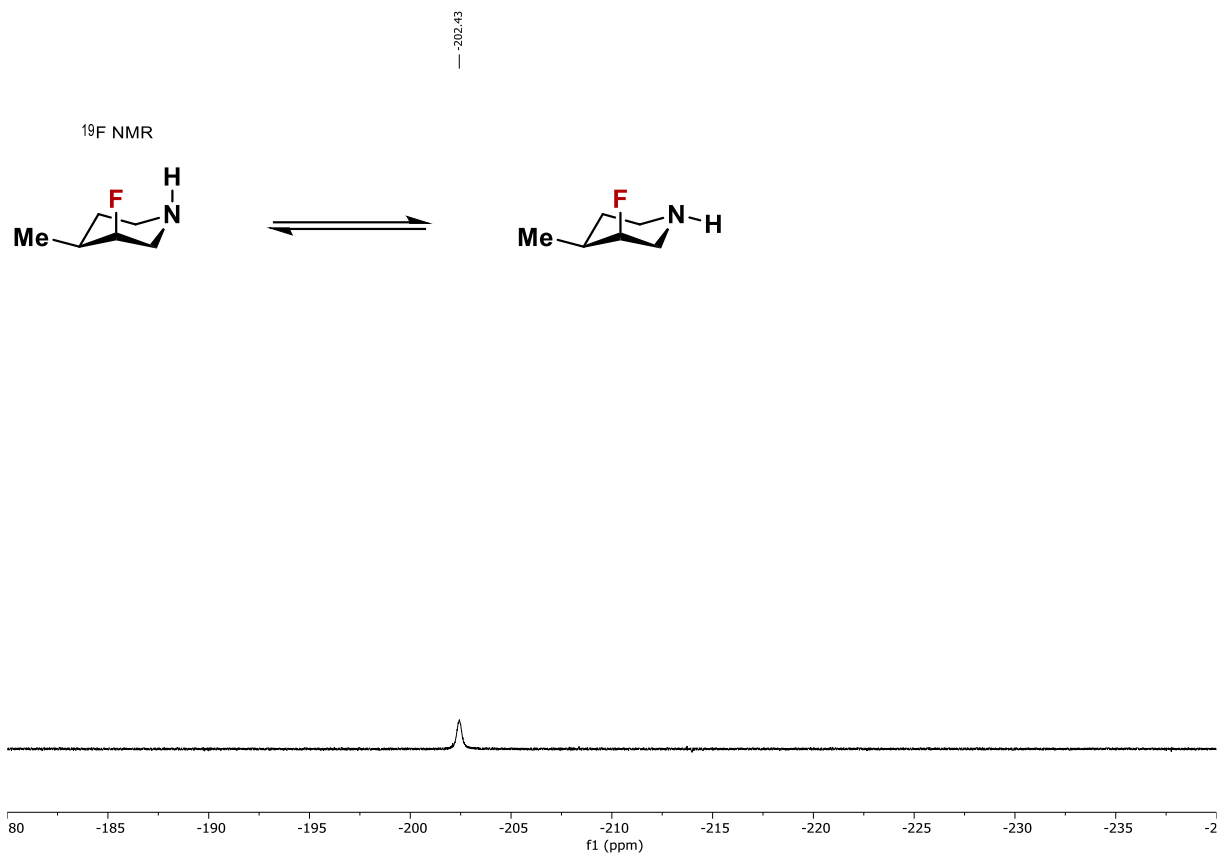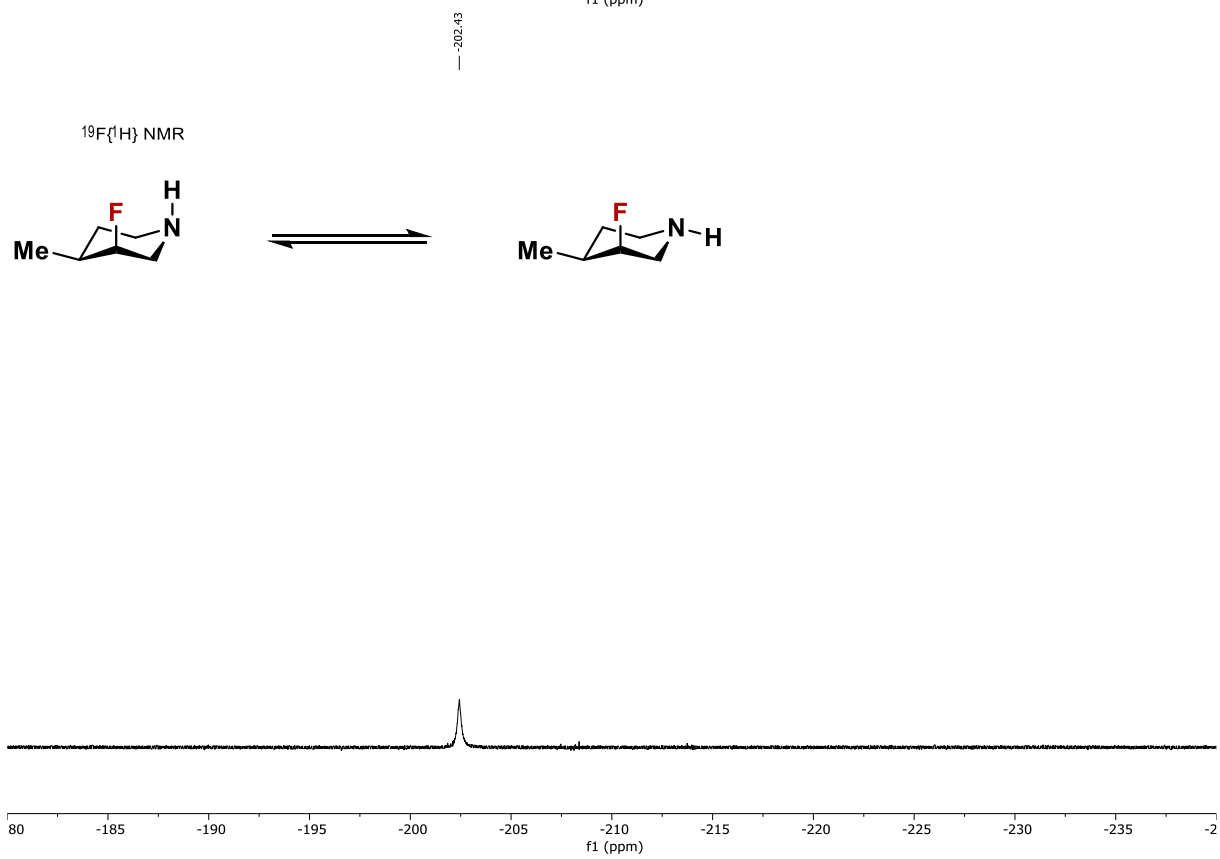

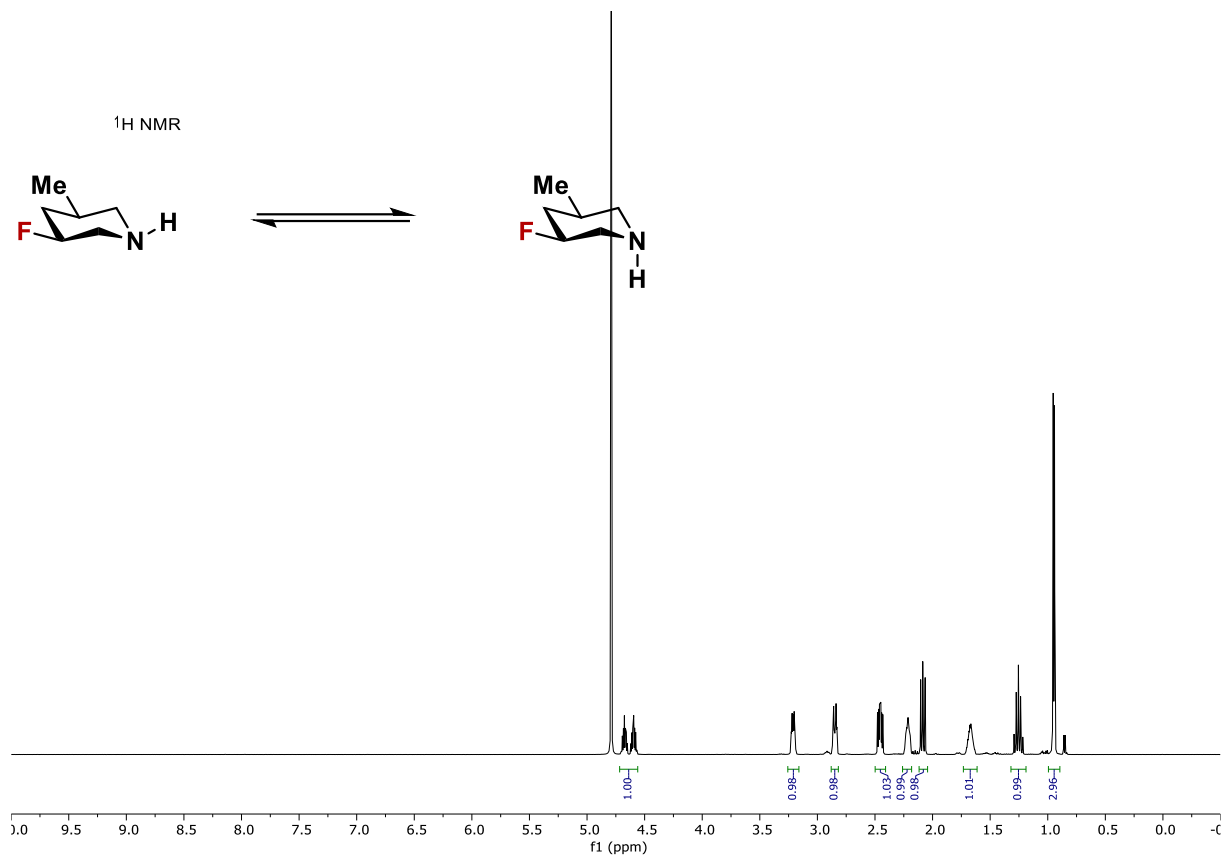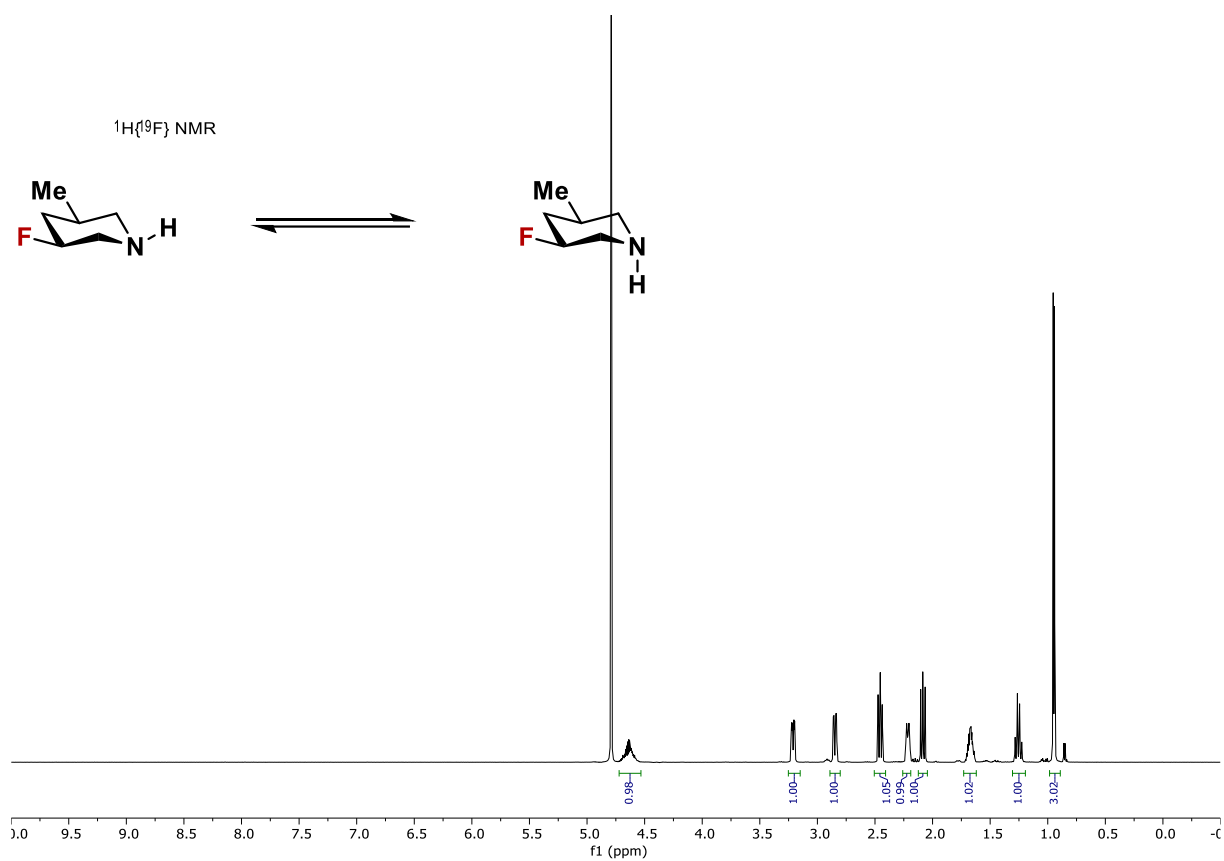

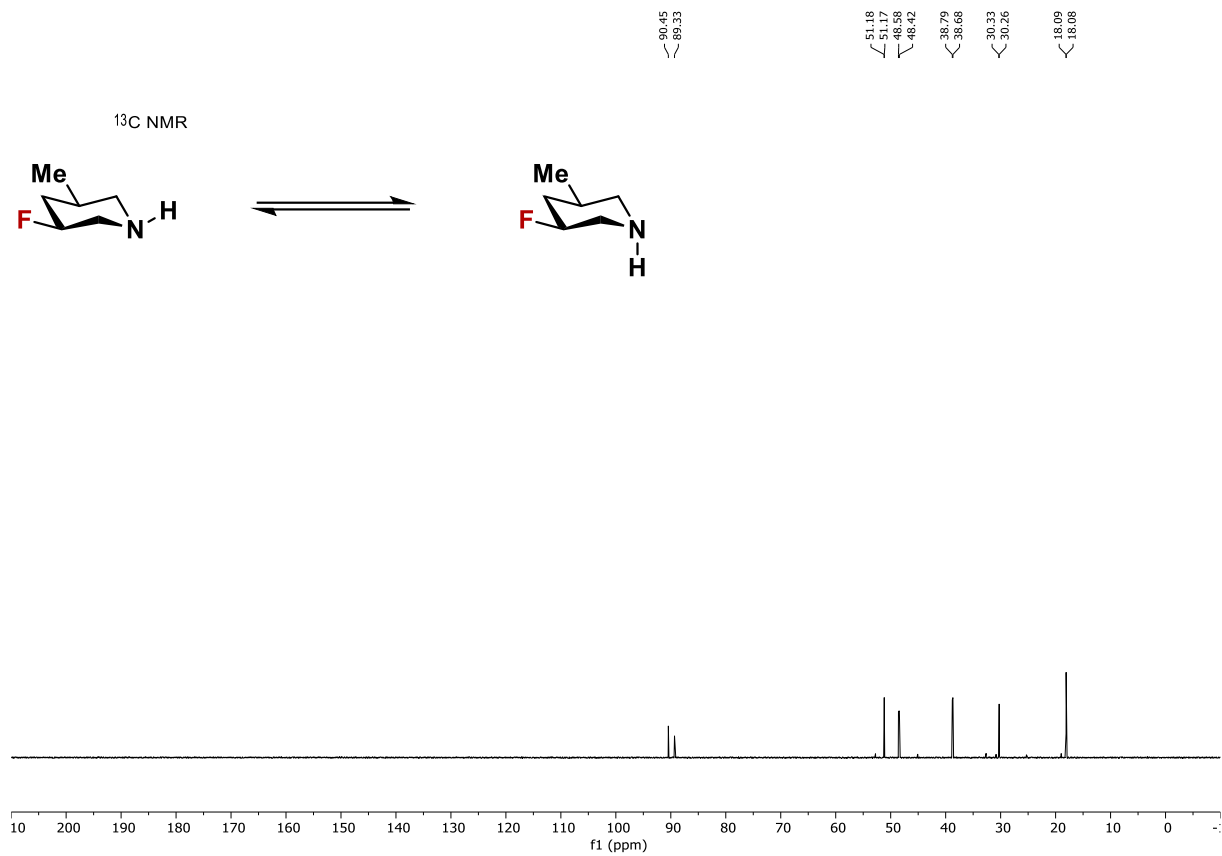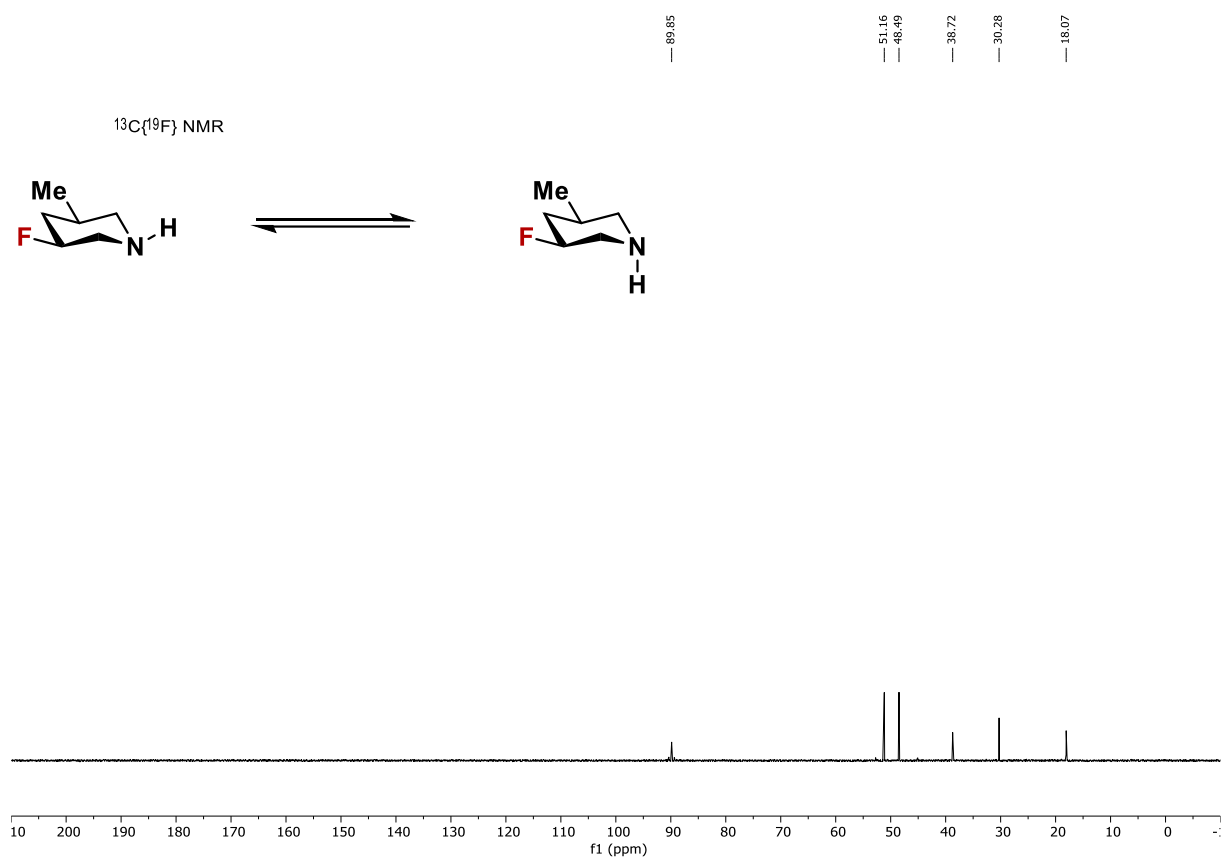



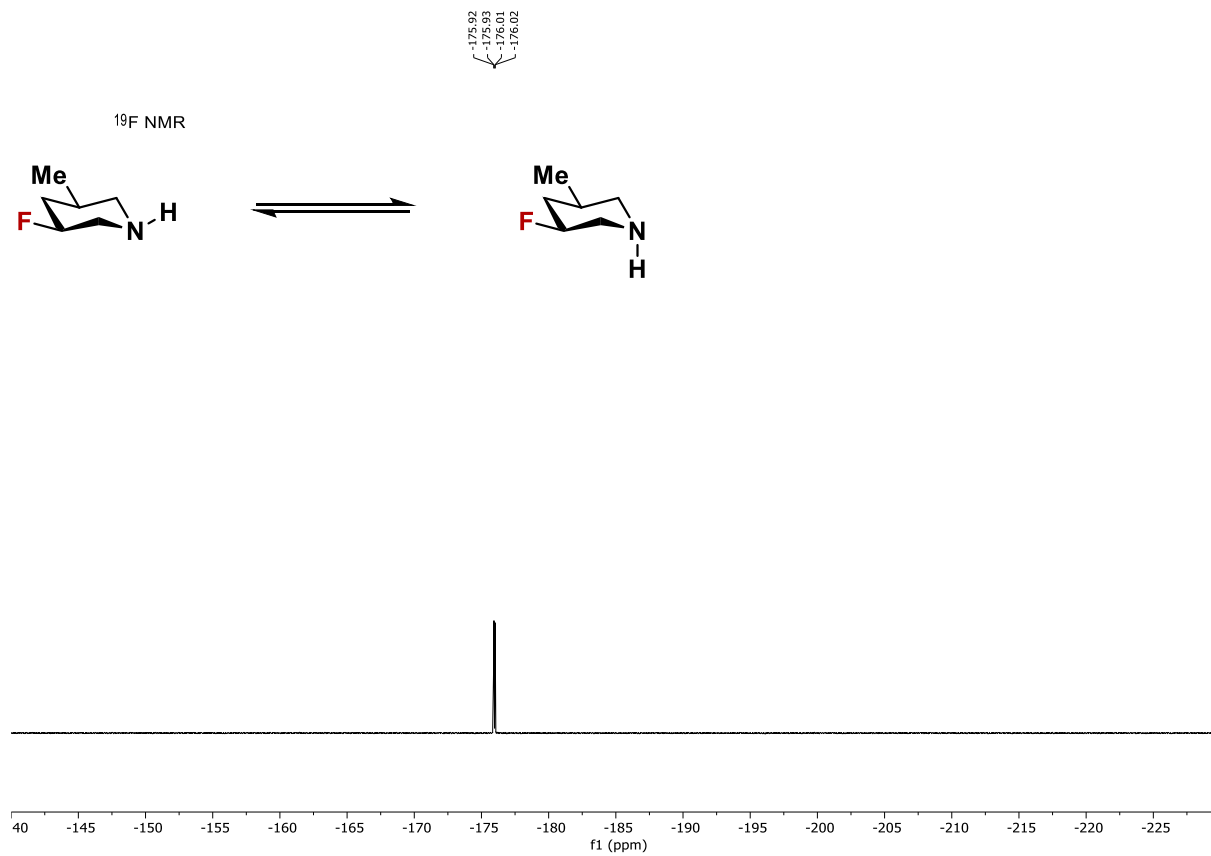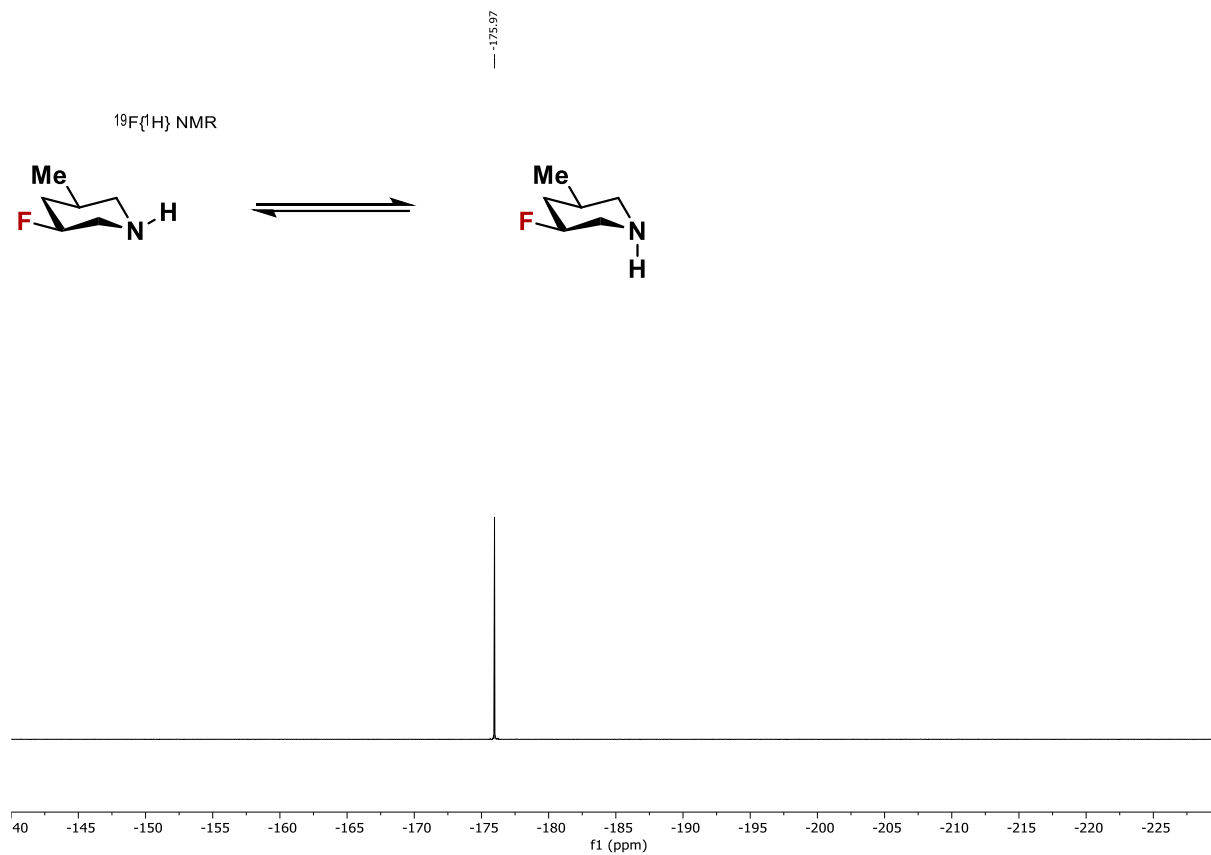

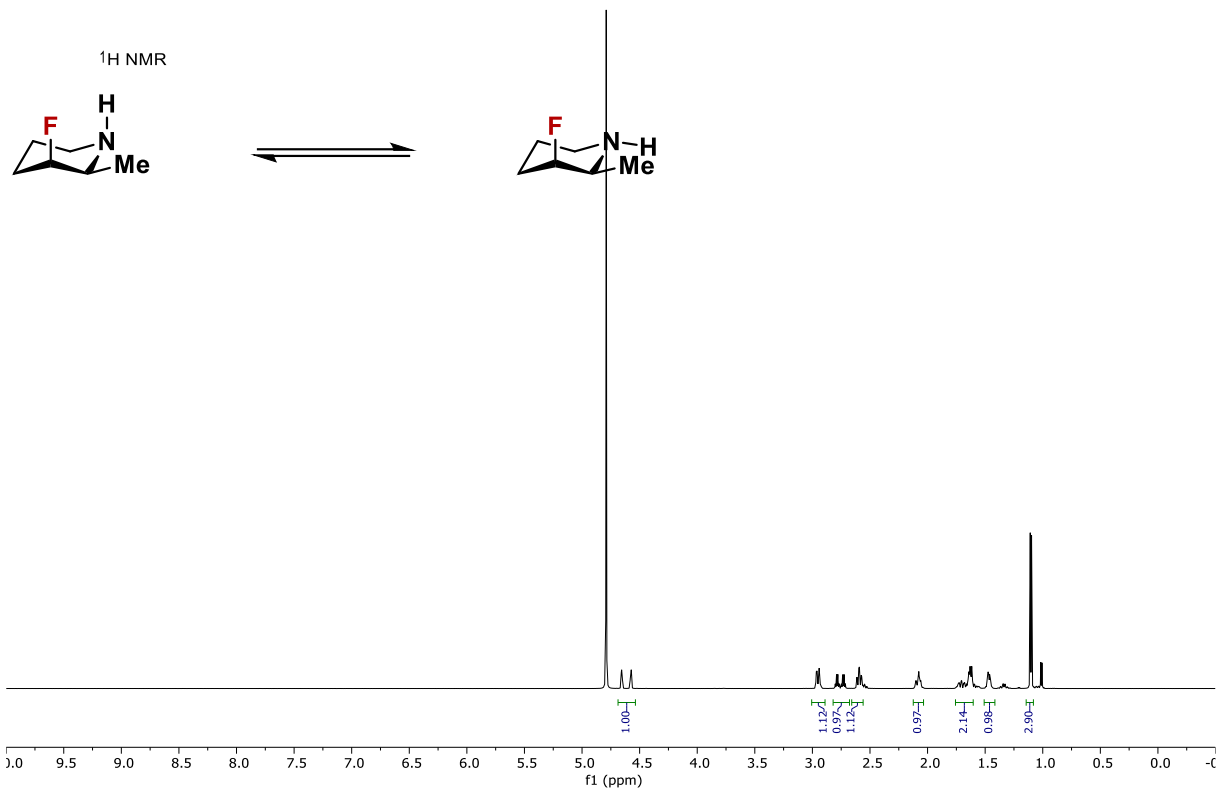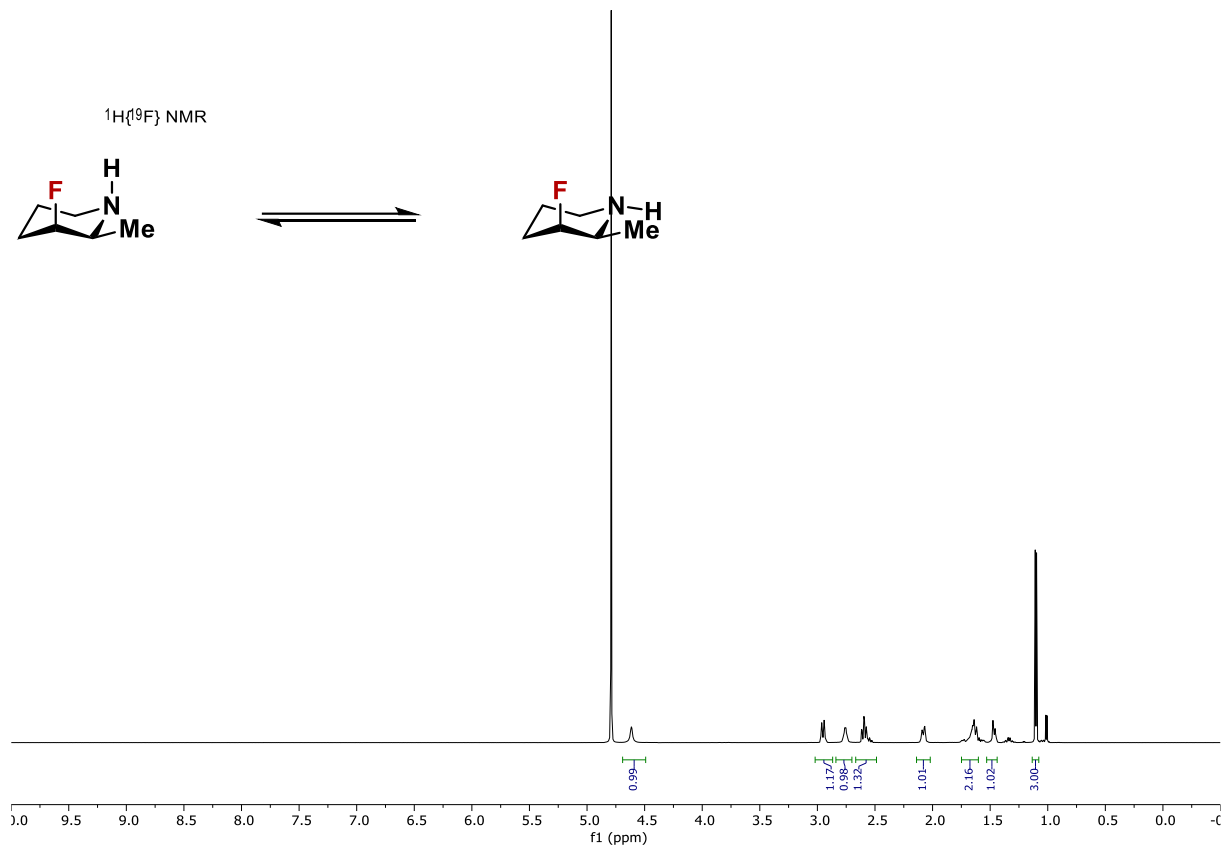

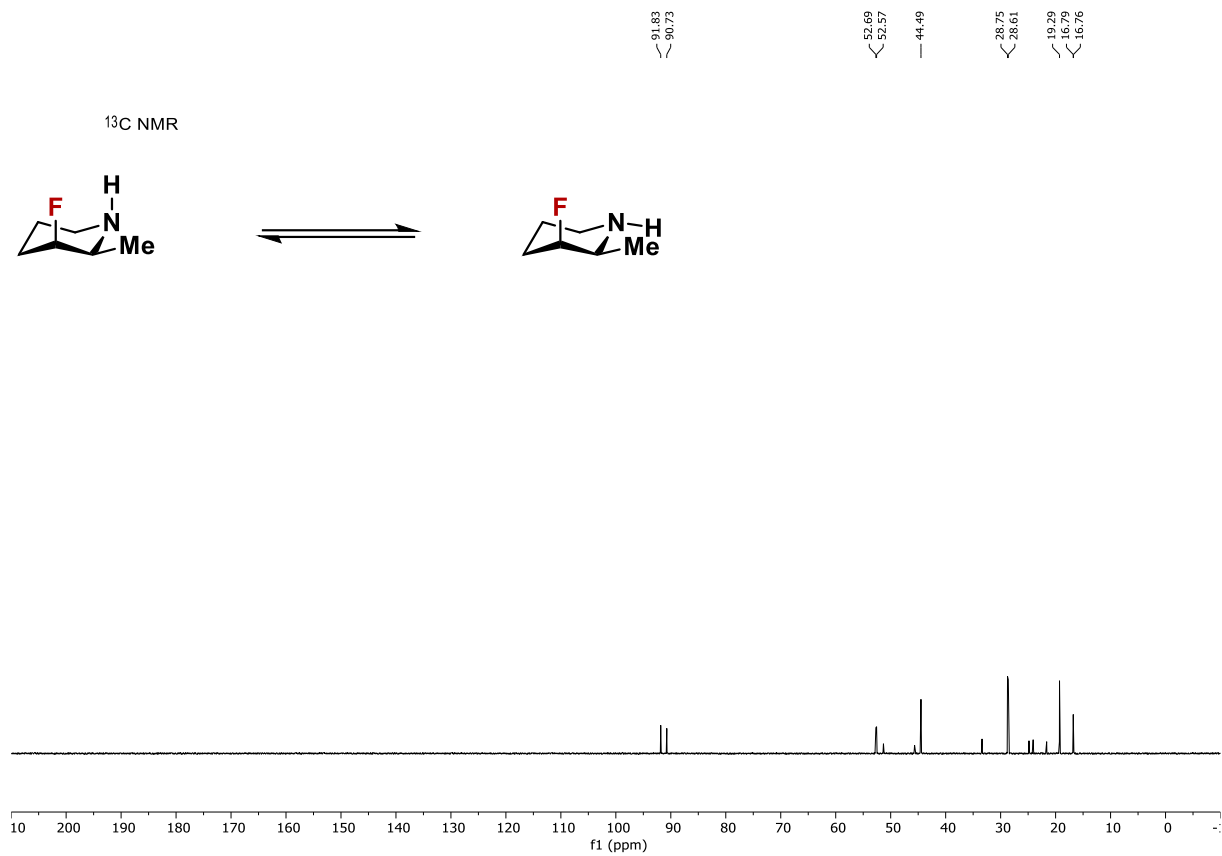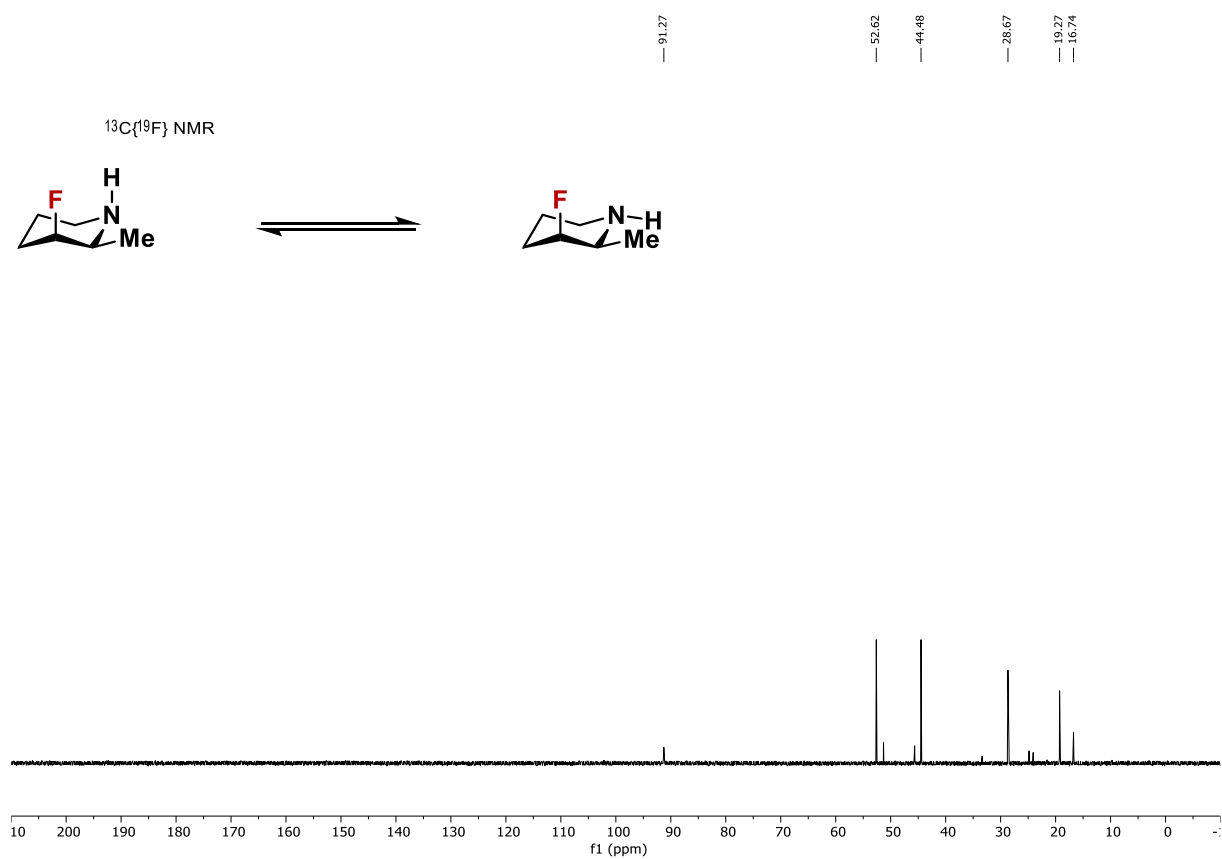

<sup>19</sup>F NMR

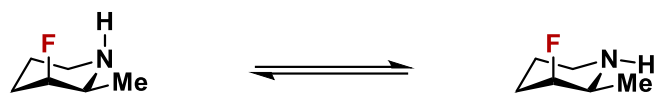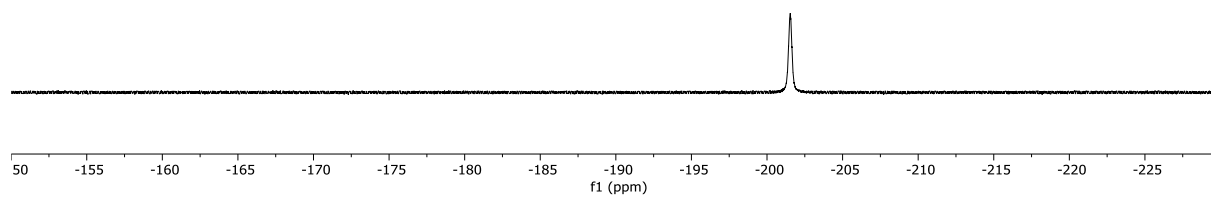

<sup>19</sup>F{<sup>1</sup>H} NMR

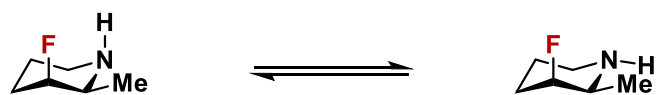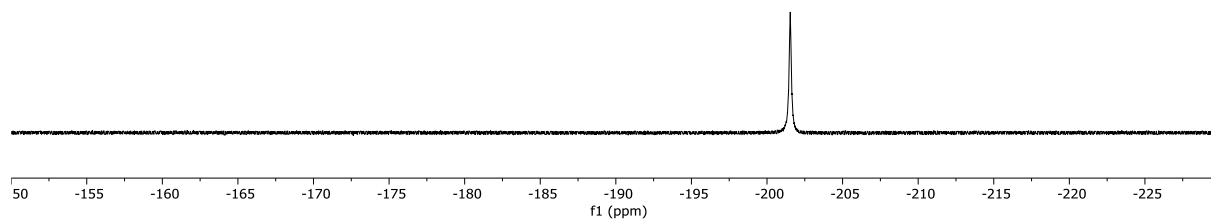

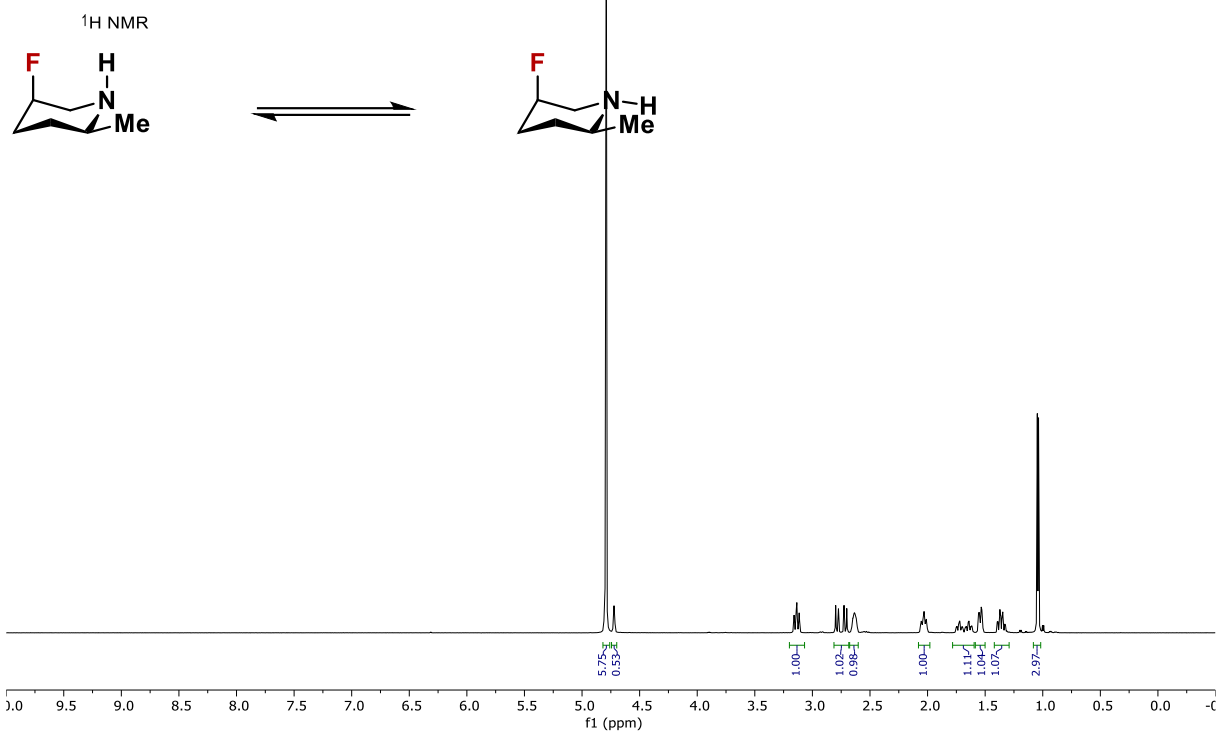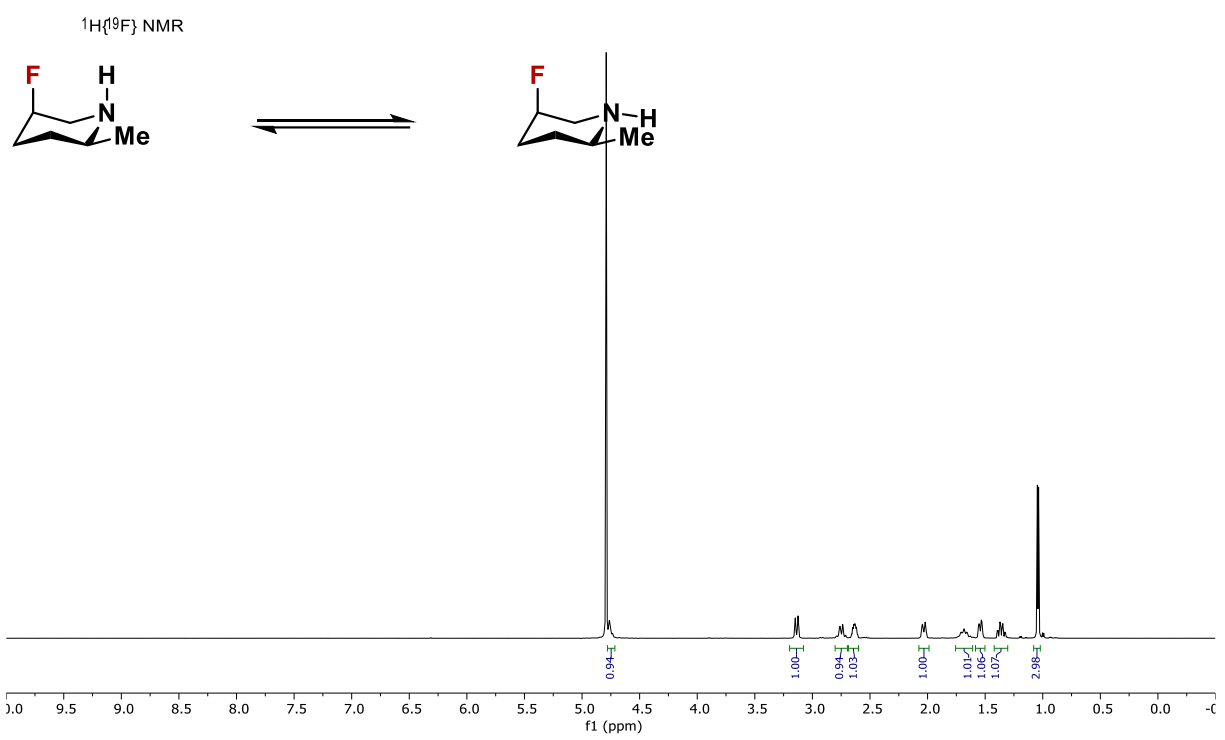

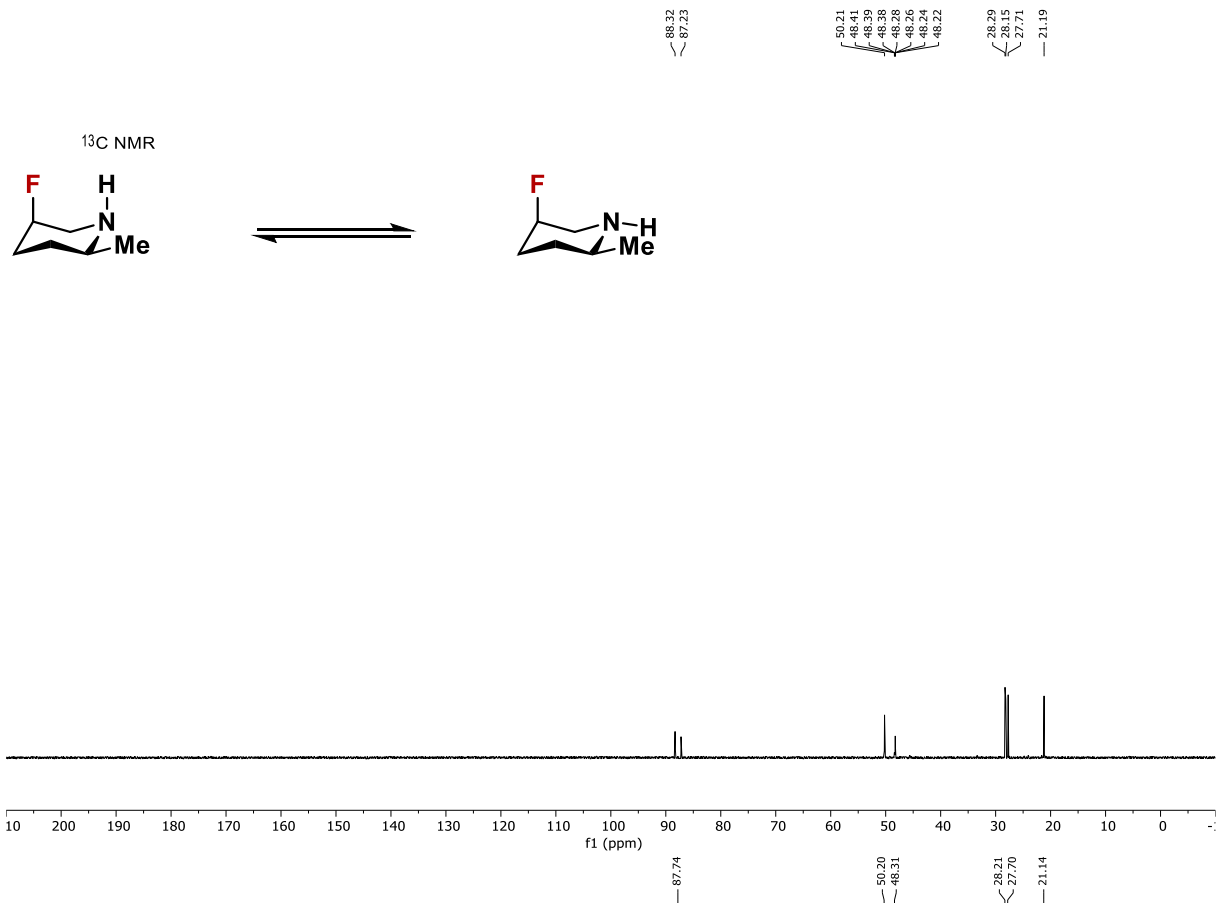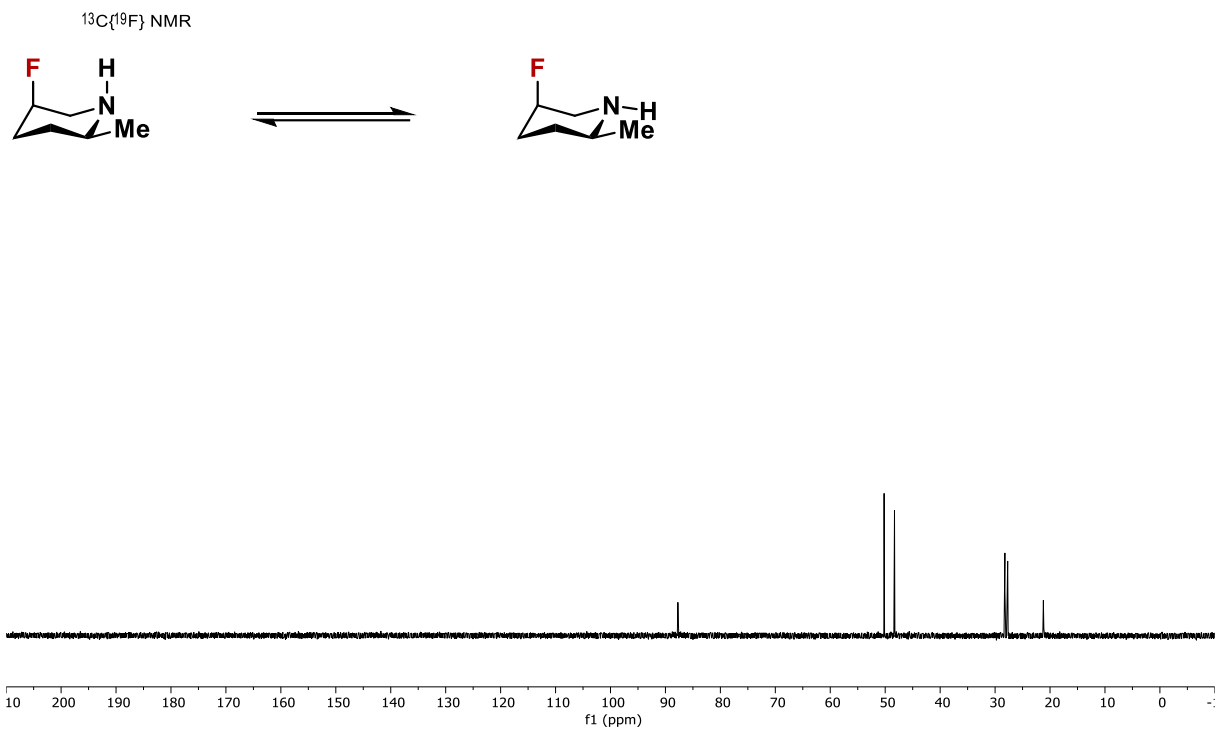

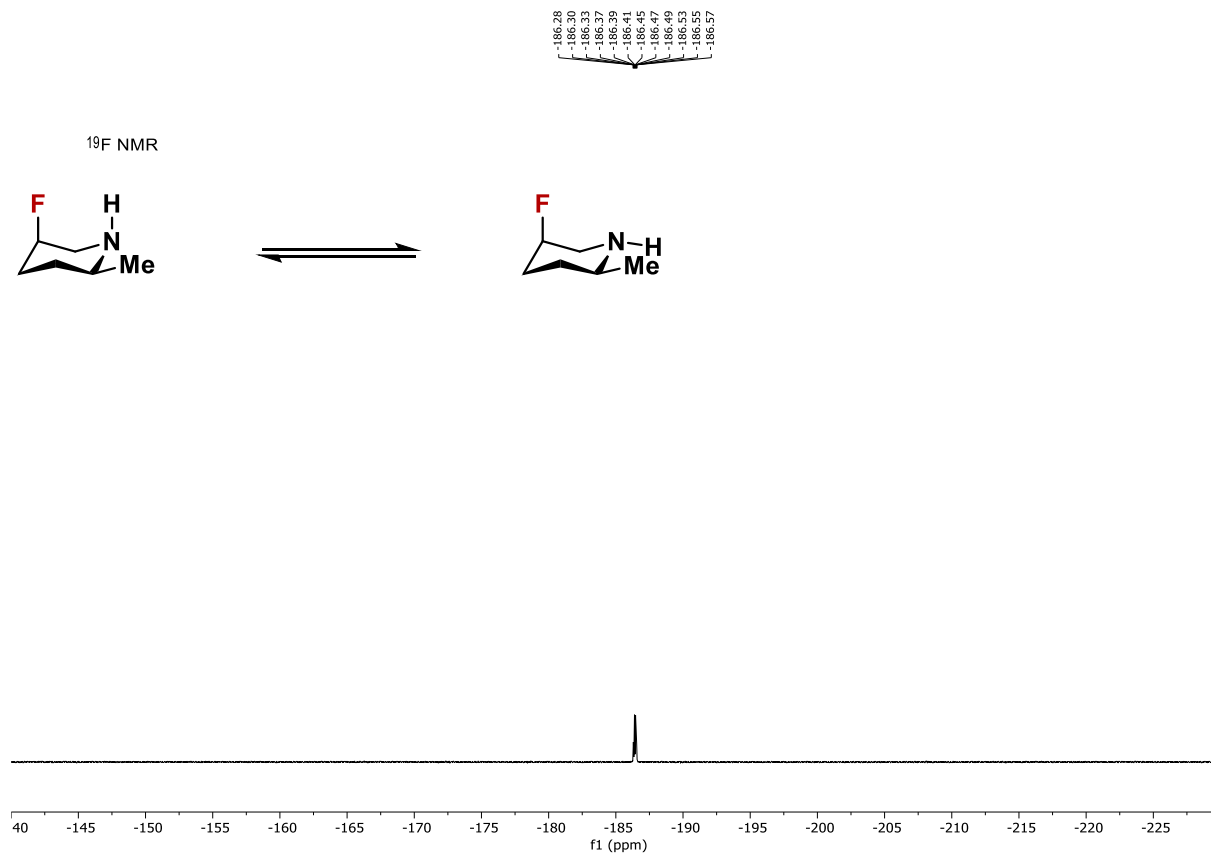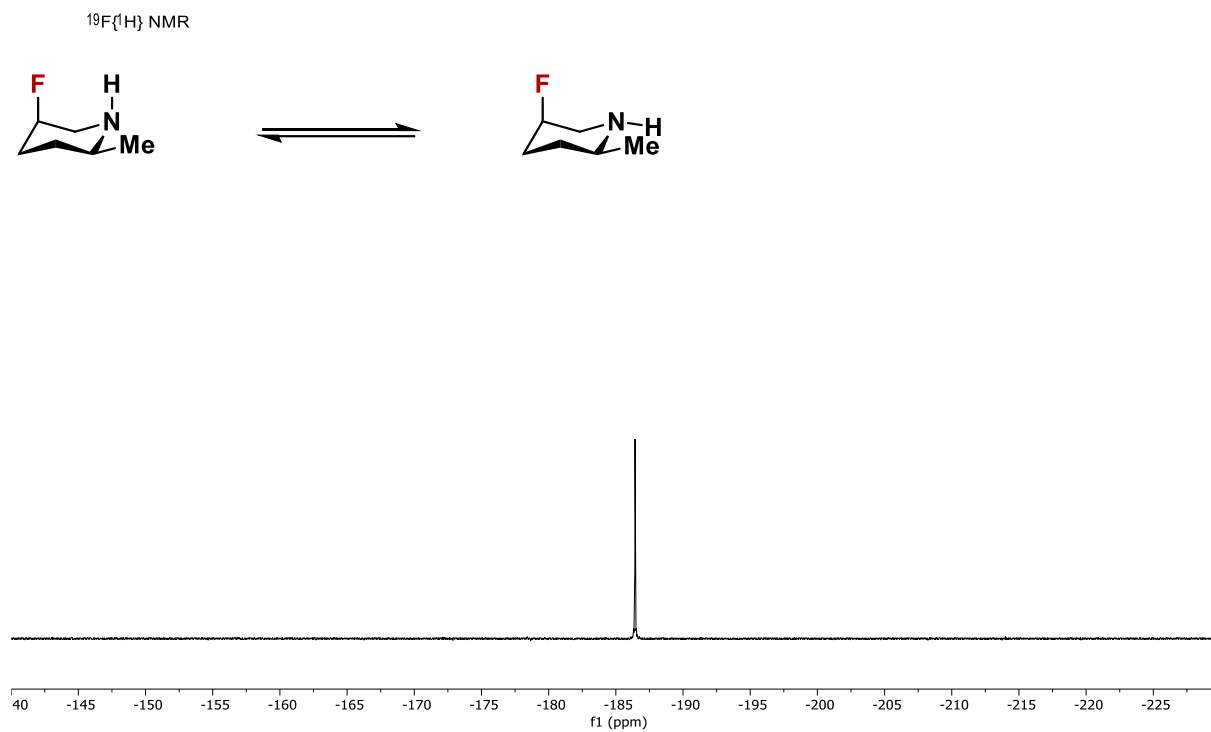

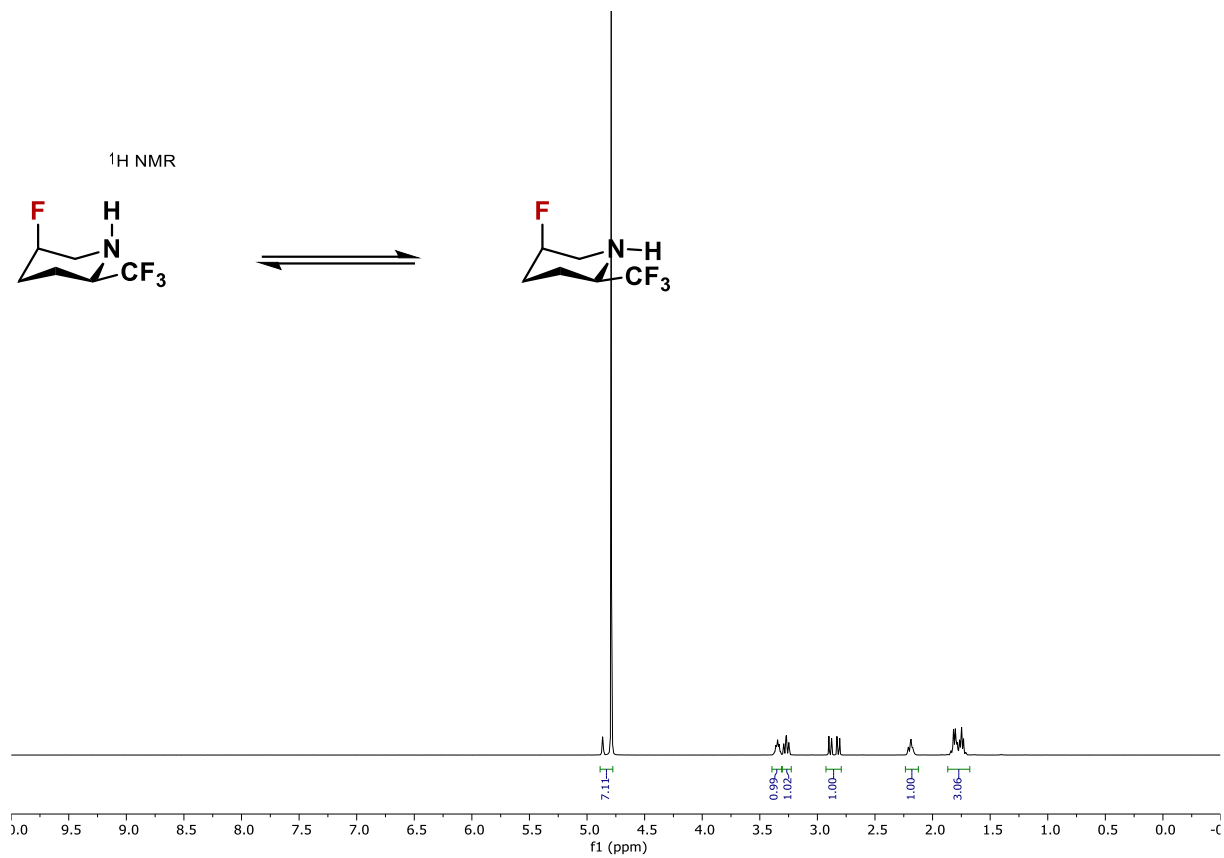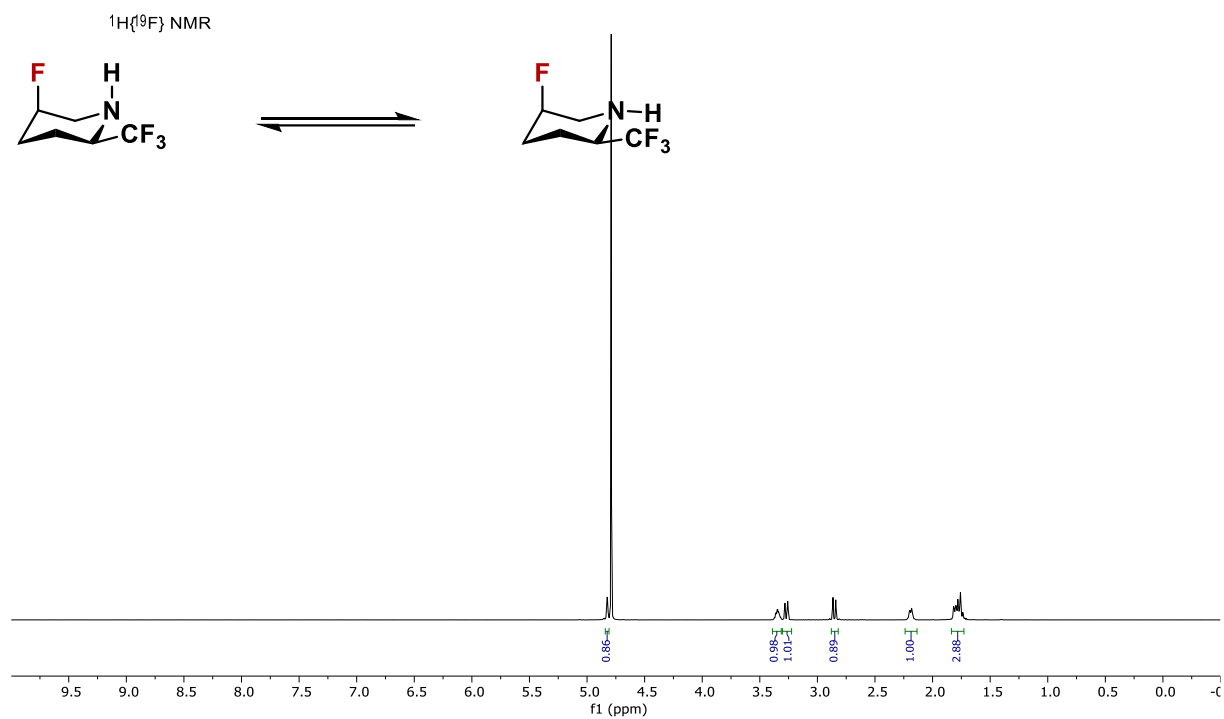



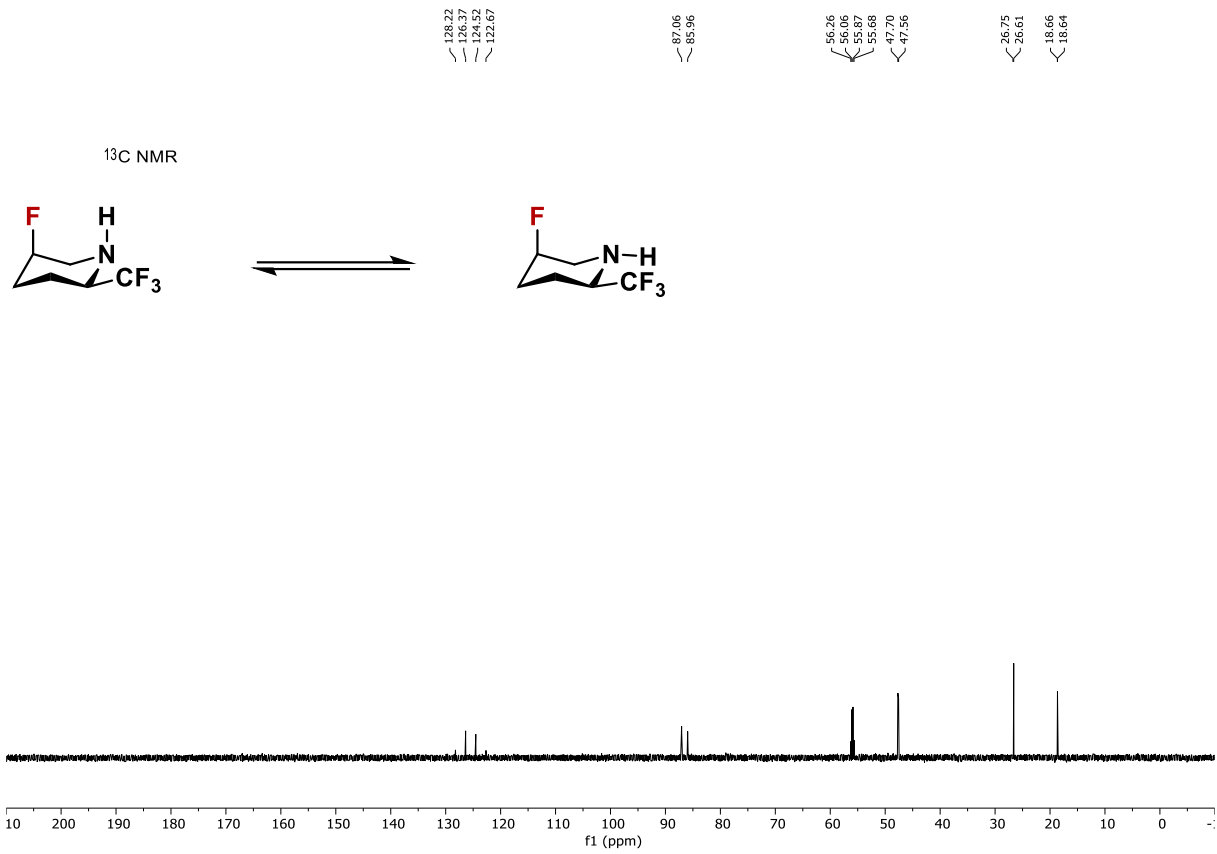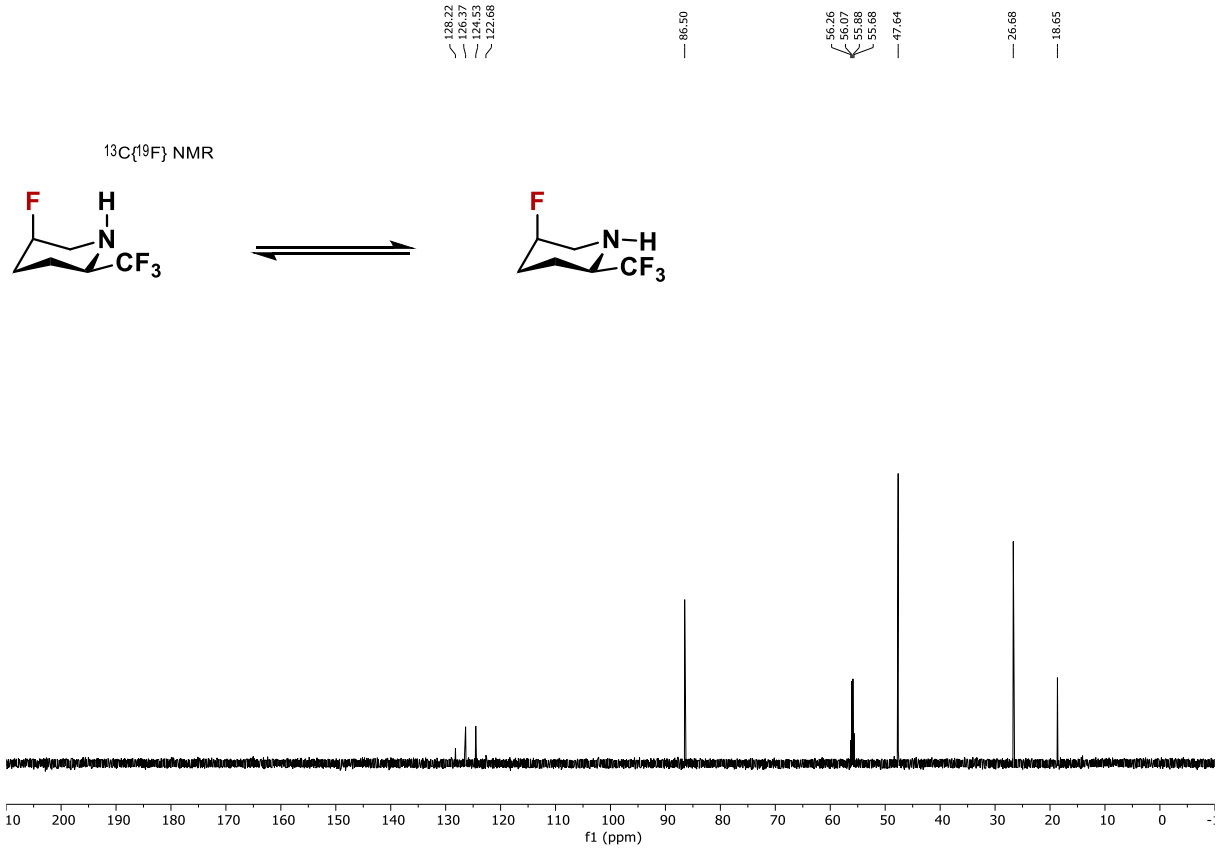

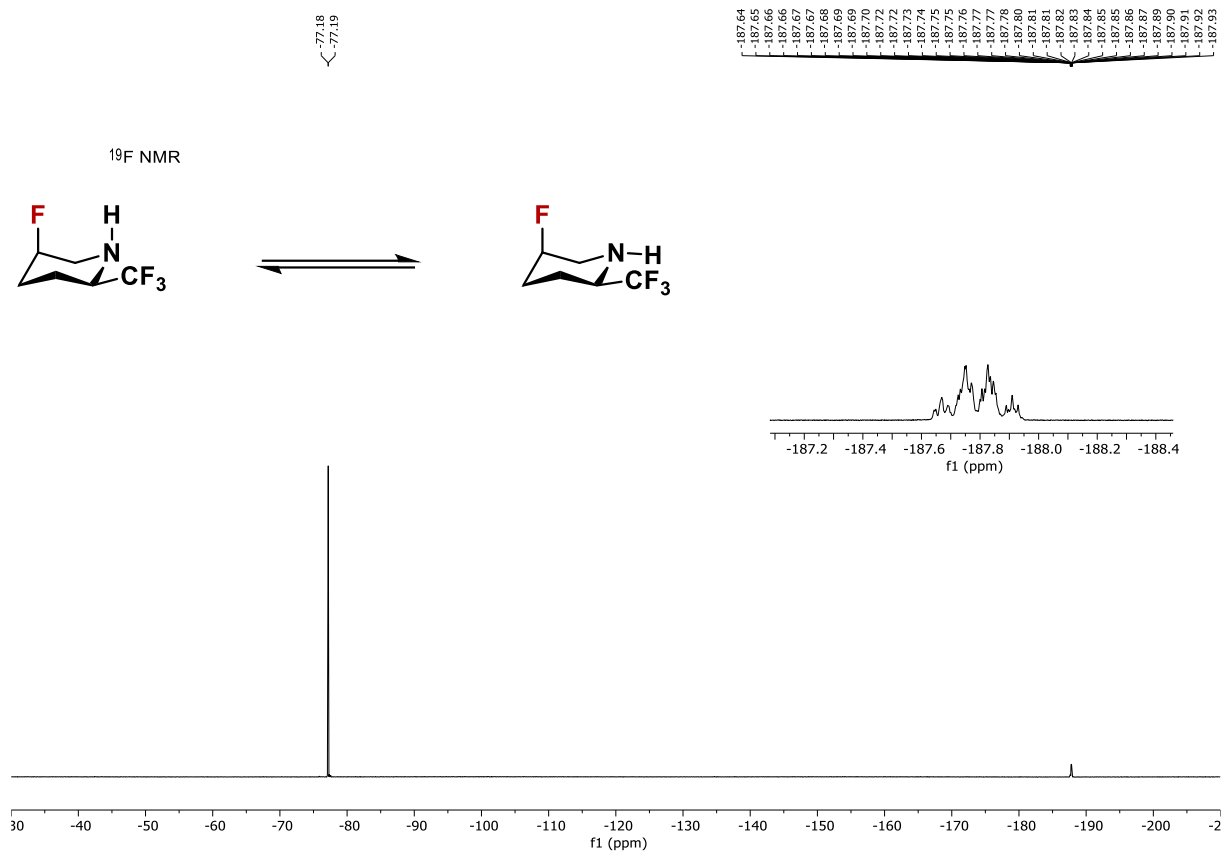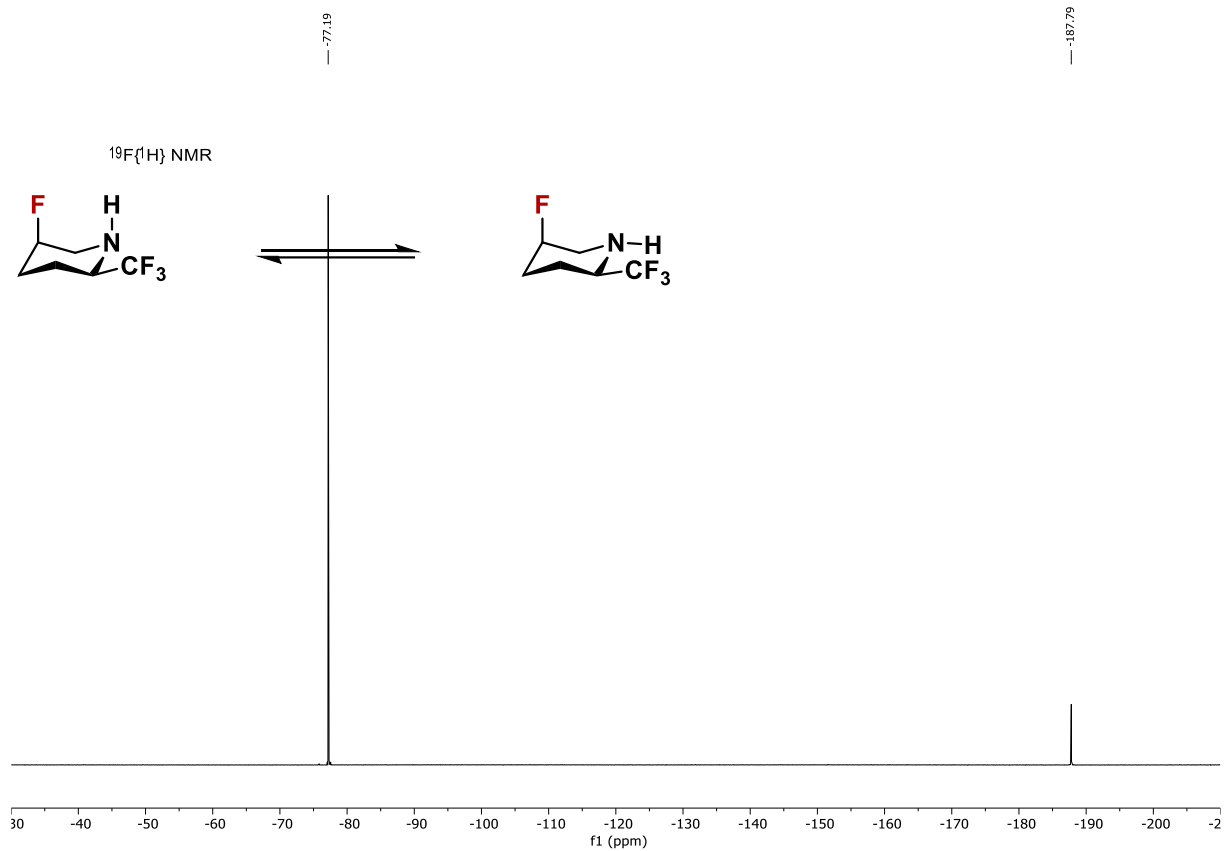

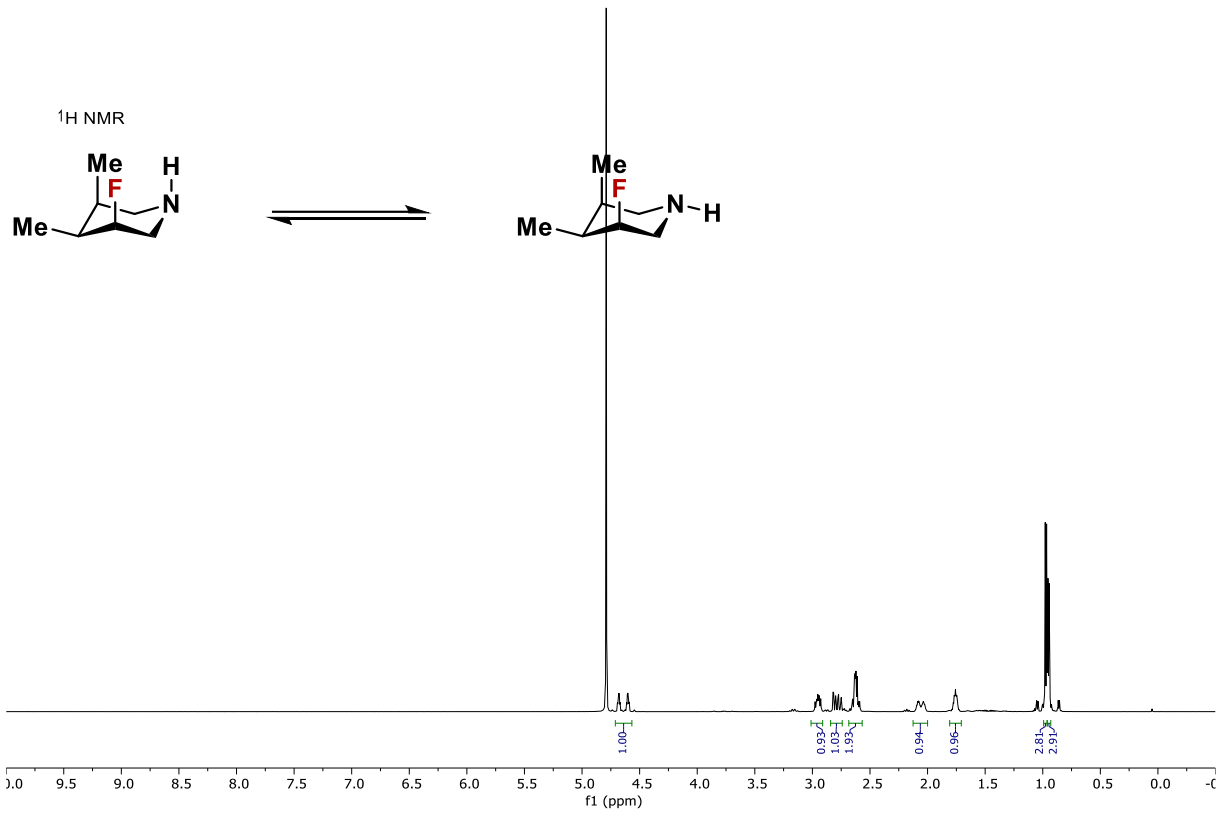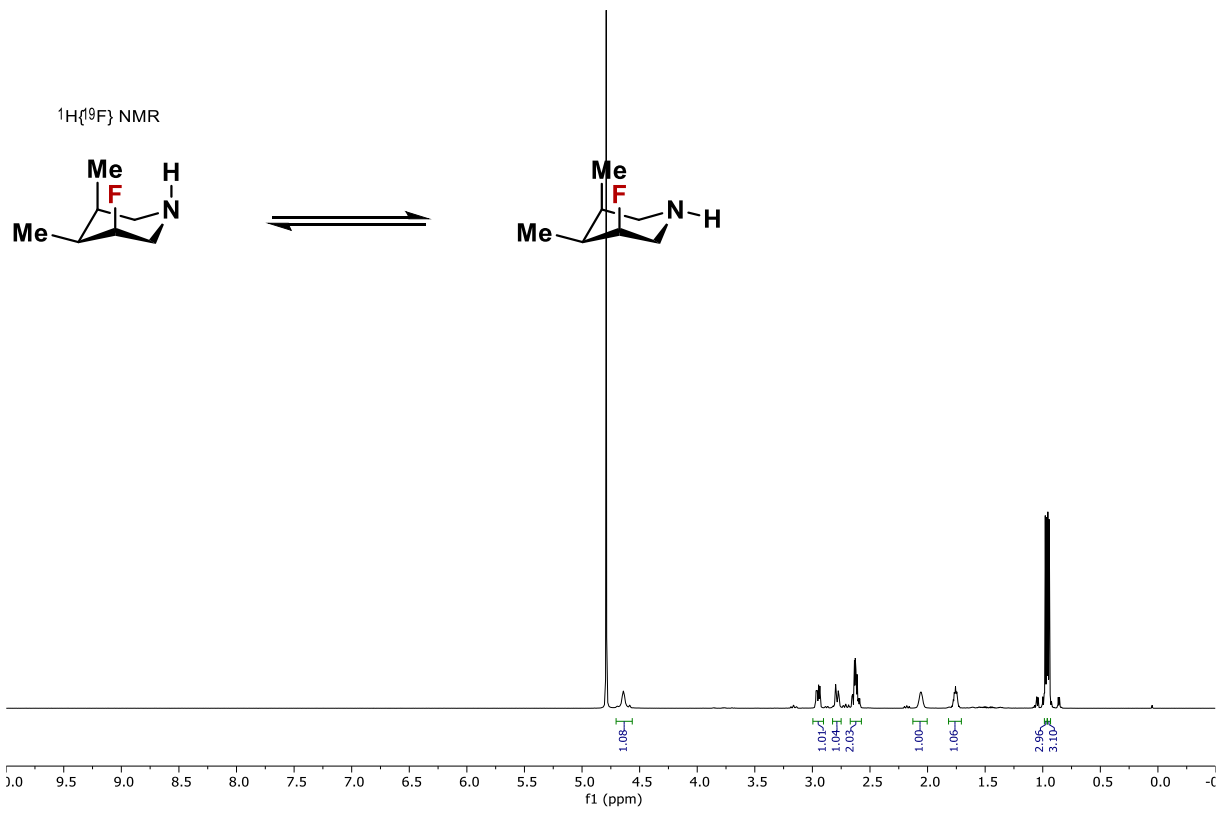

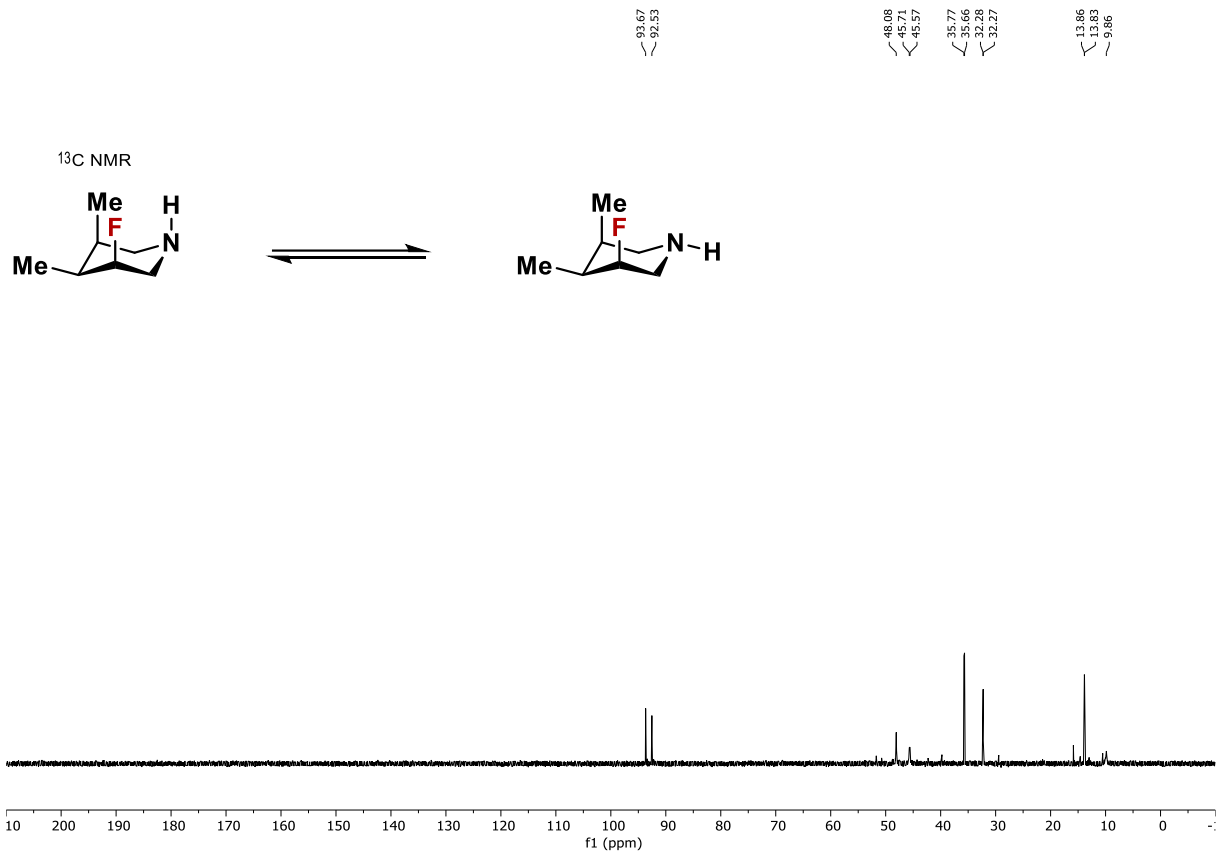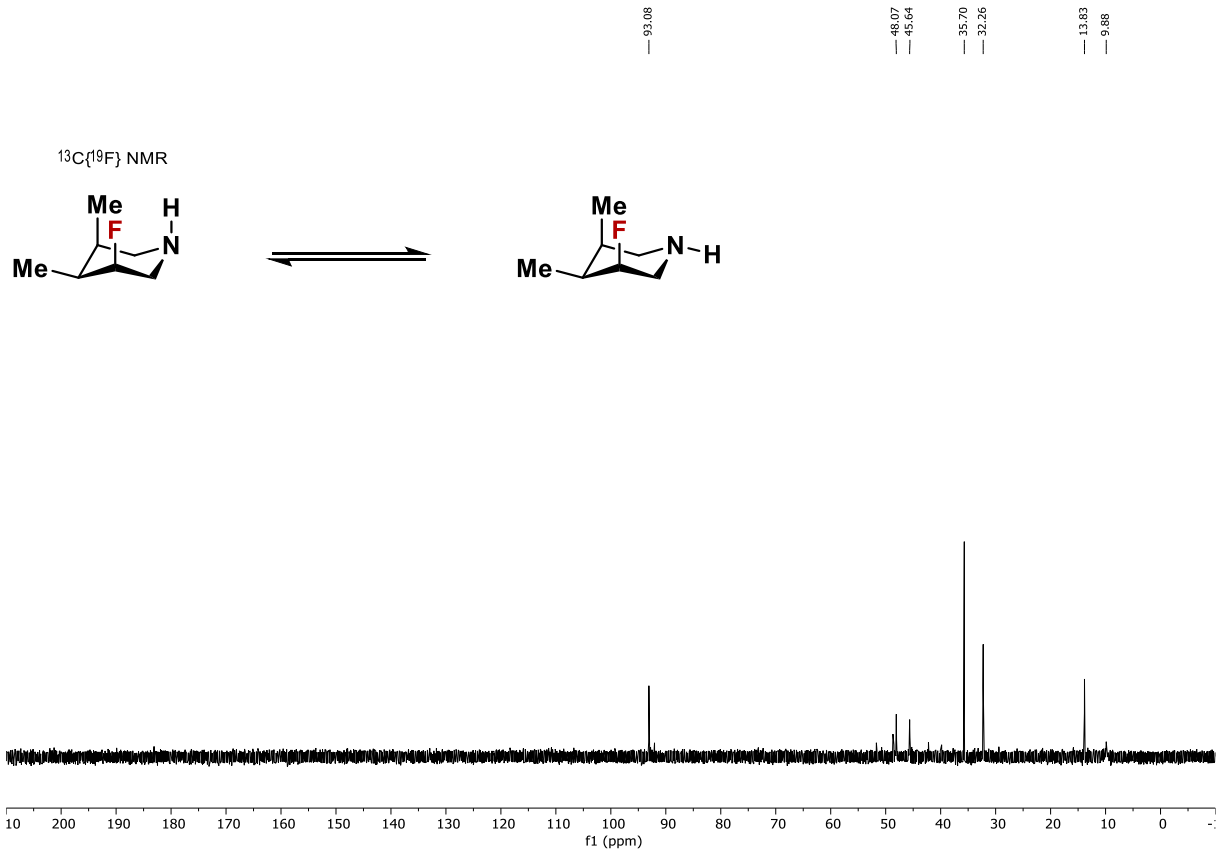

<sup>19</sup>F NMR

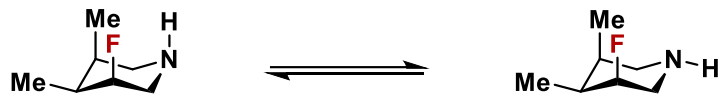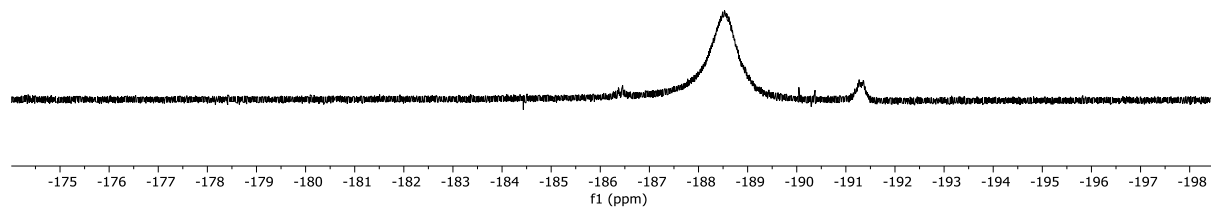

-188.53

<sup>19</sup>F{<sup>1</sup>H} NMR

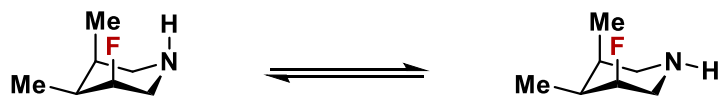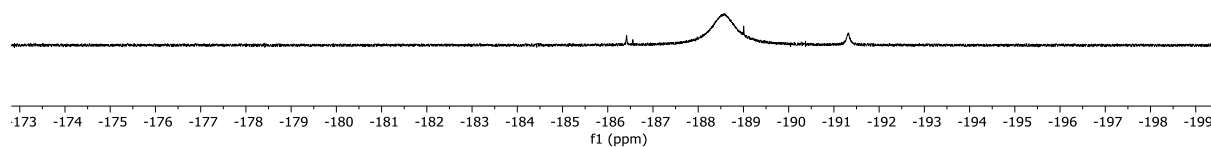

-188.56

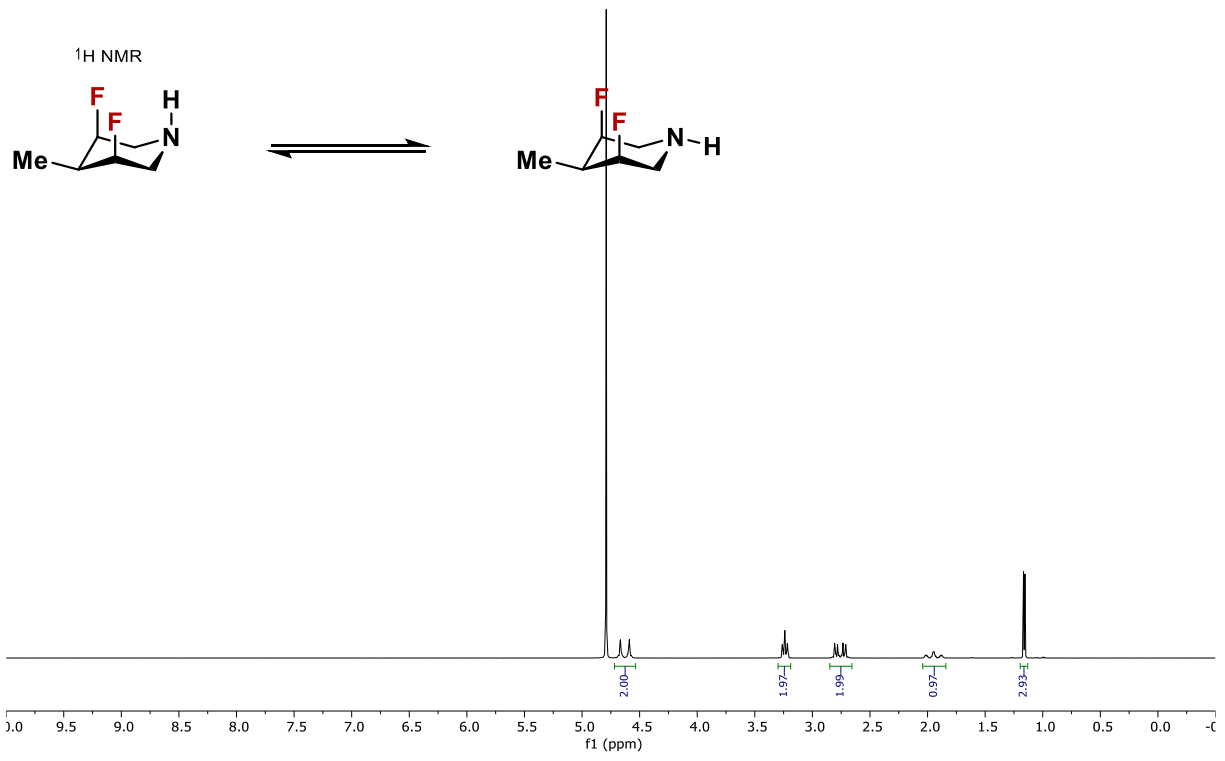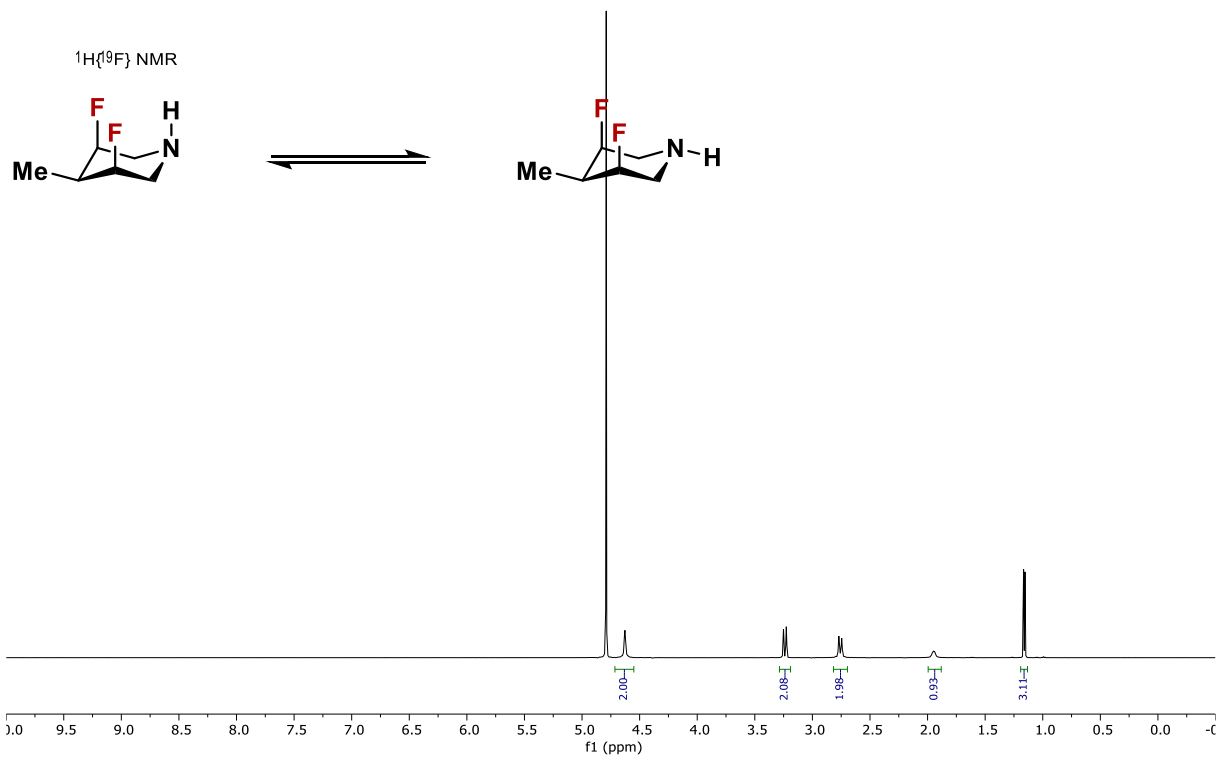

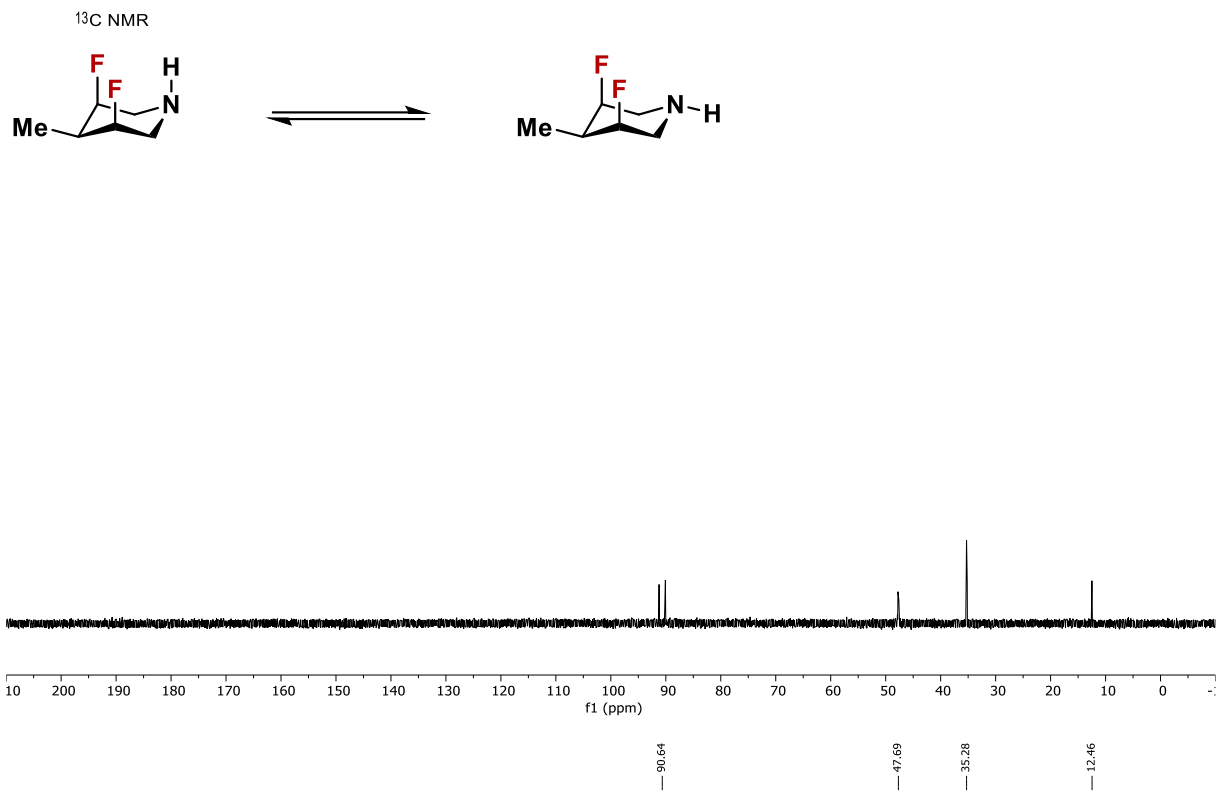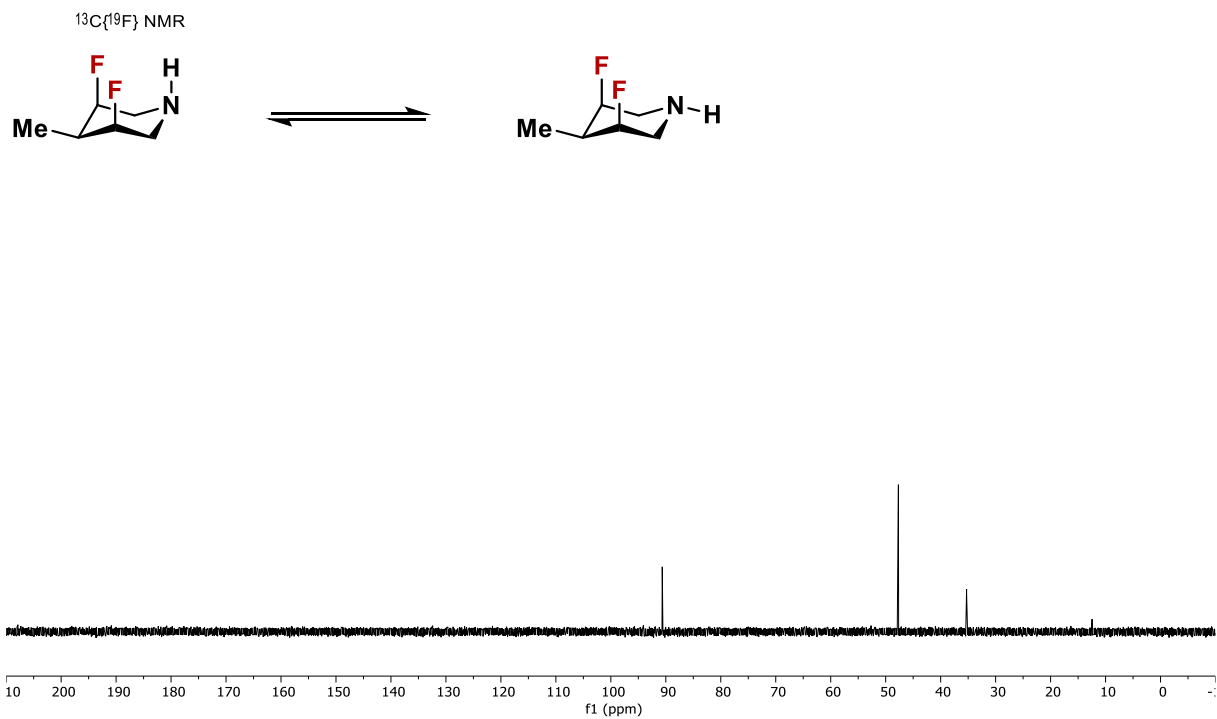

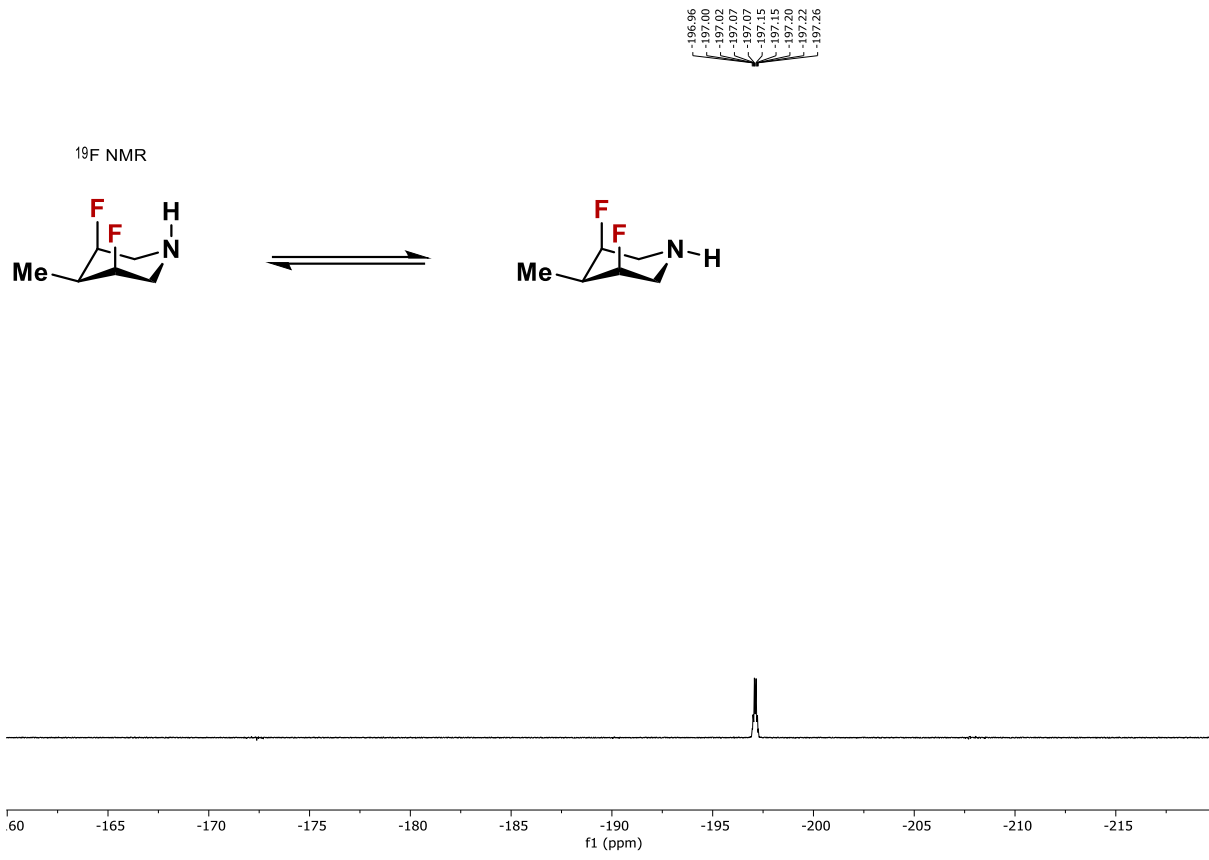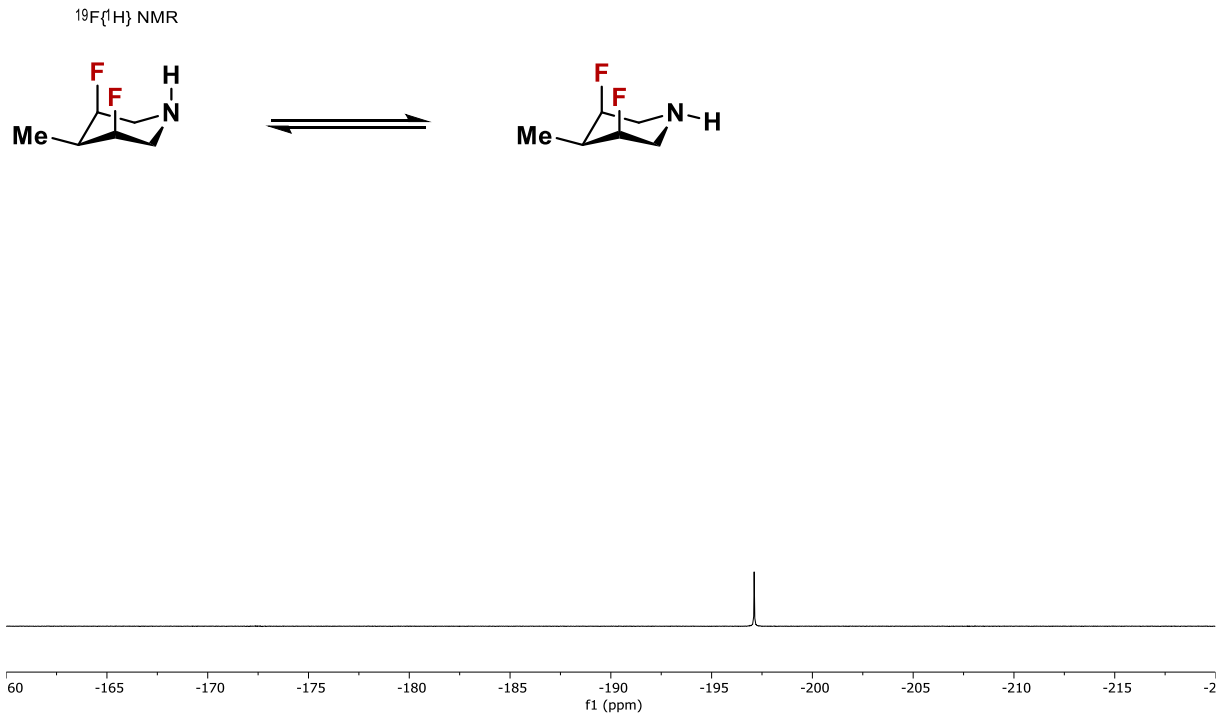



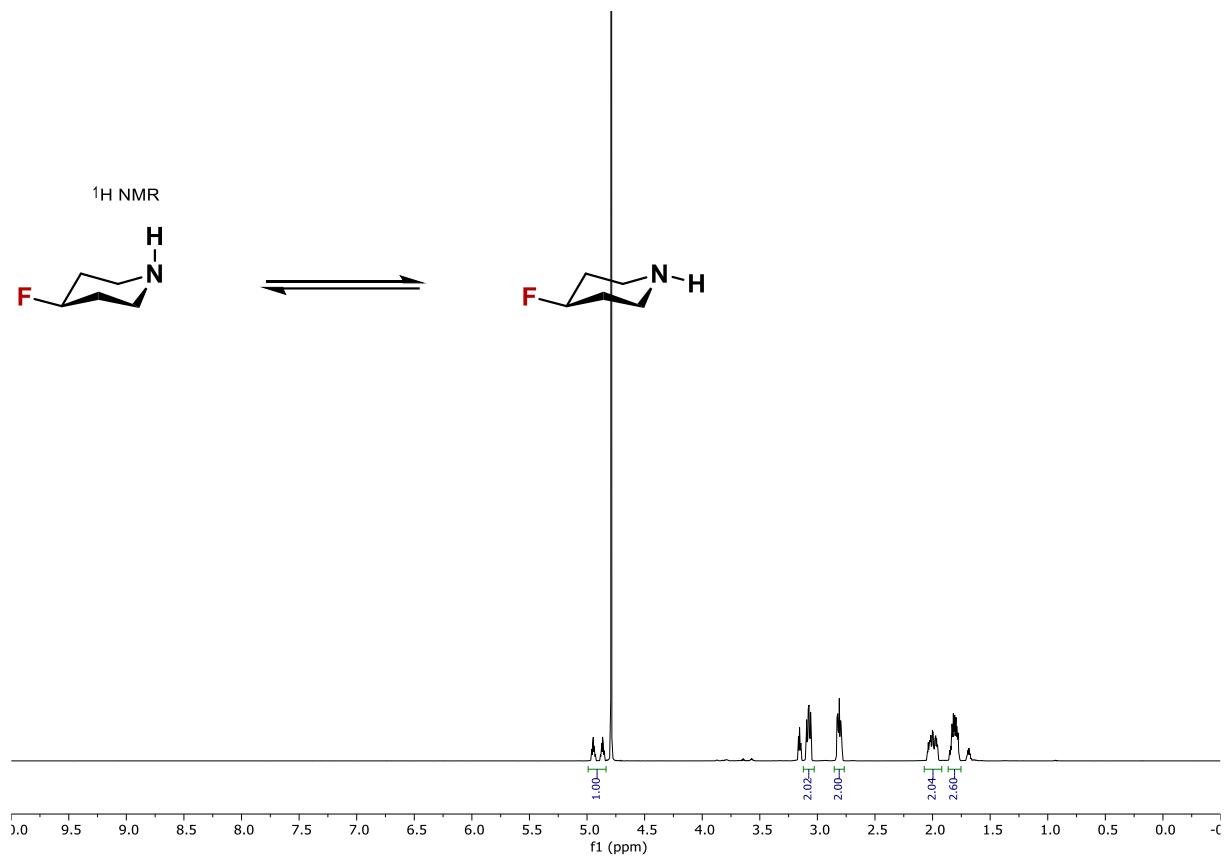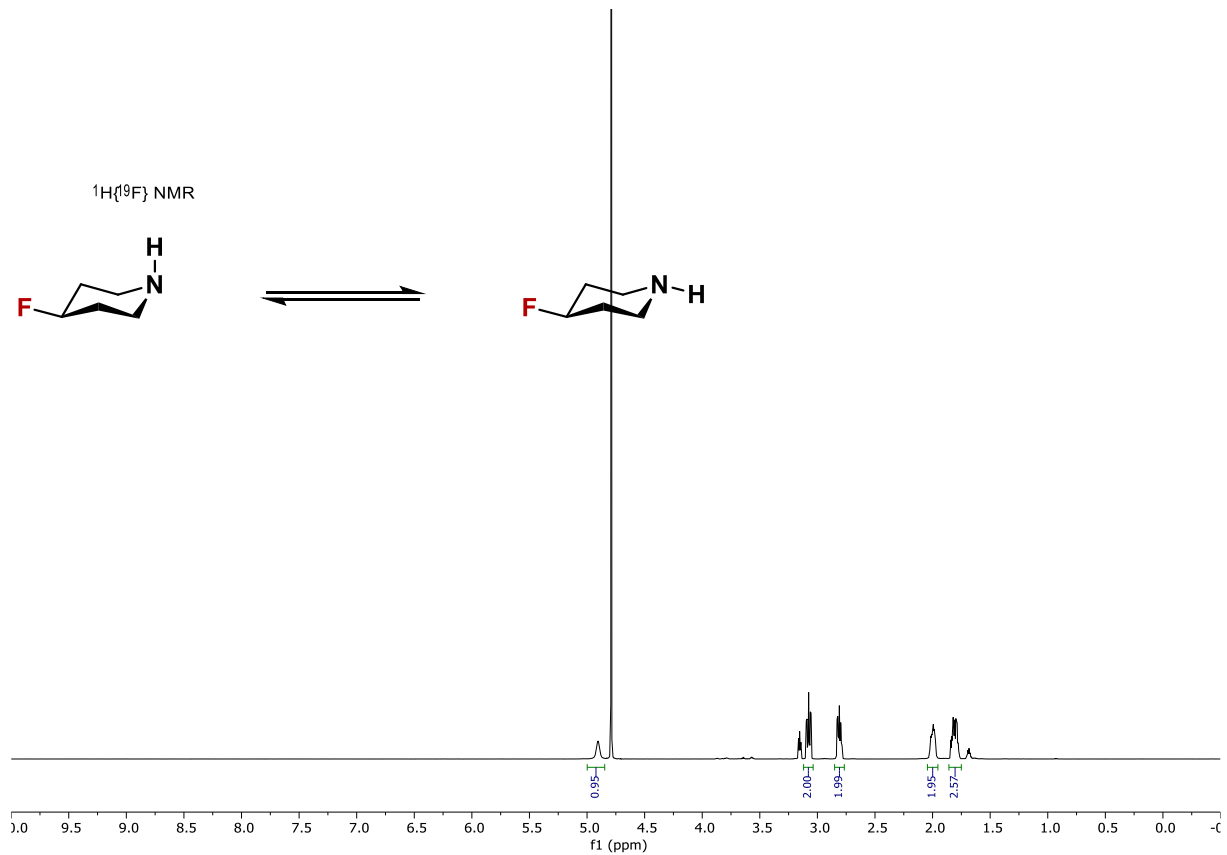

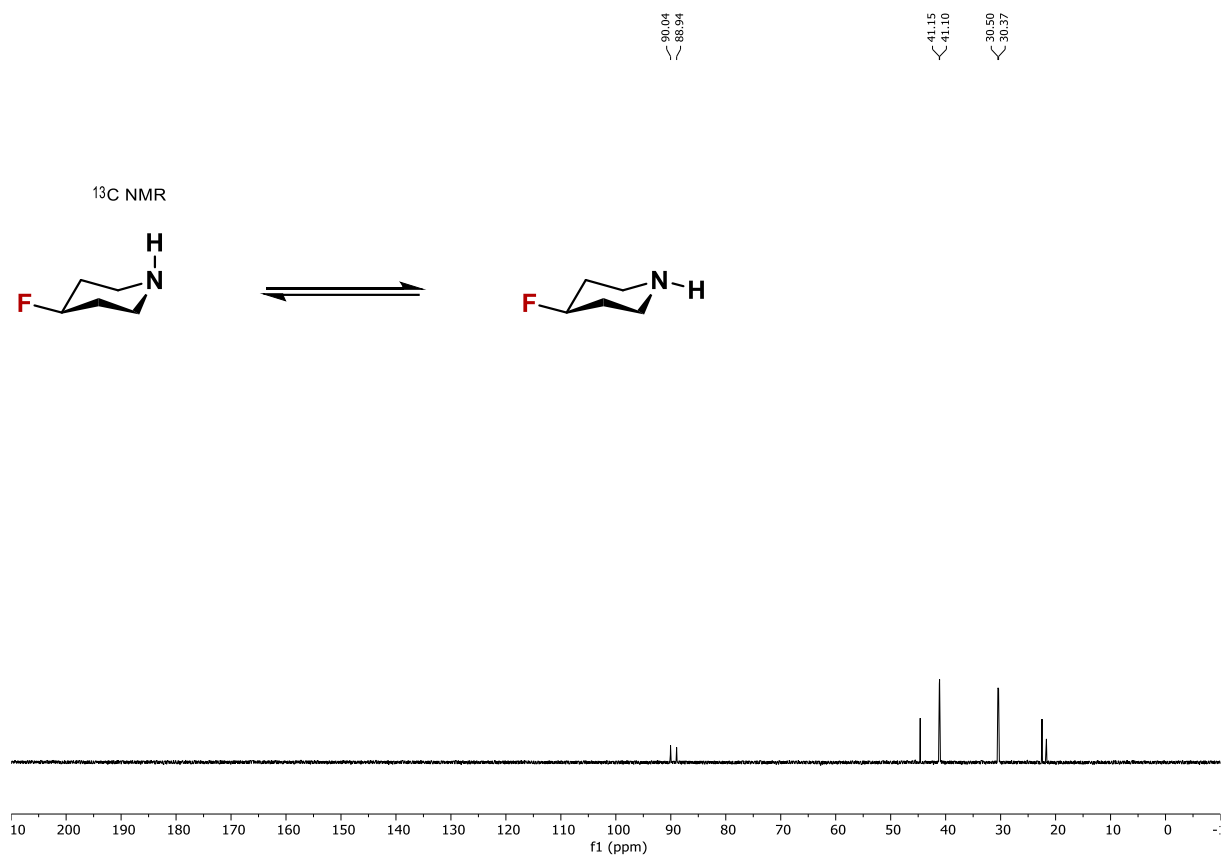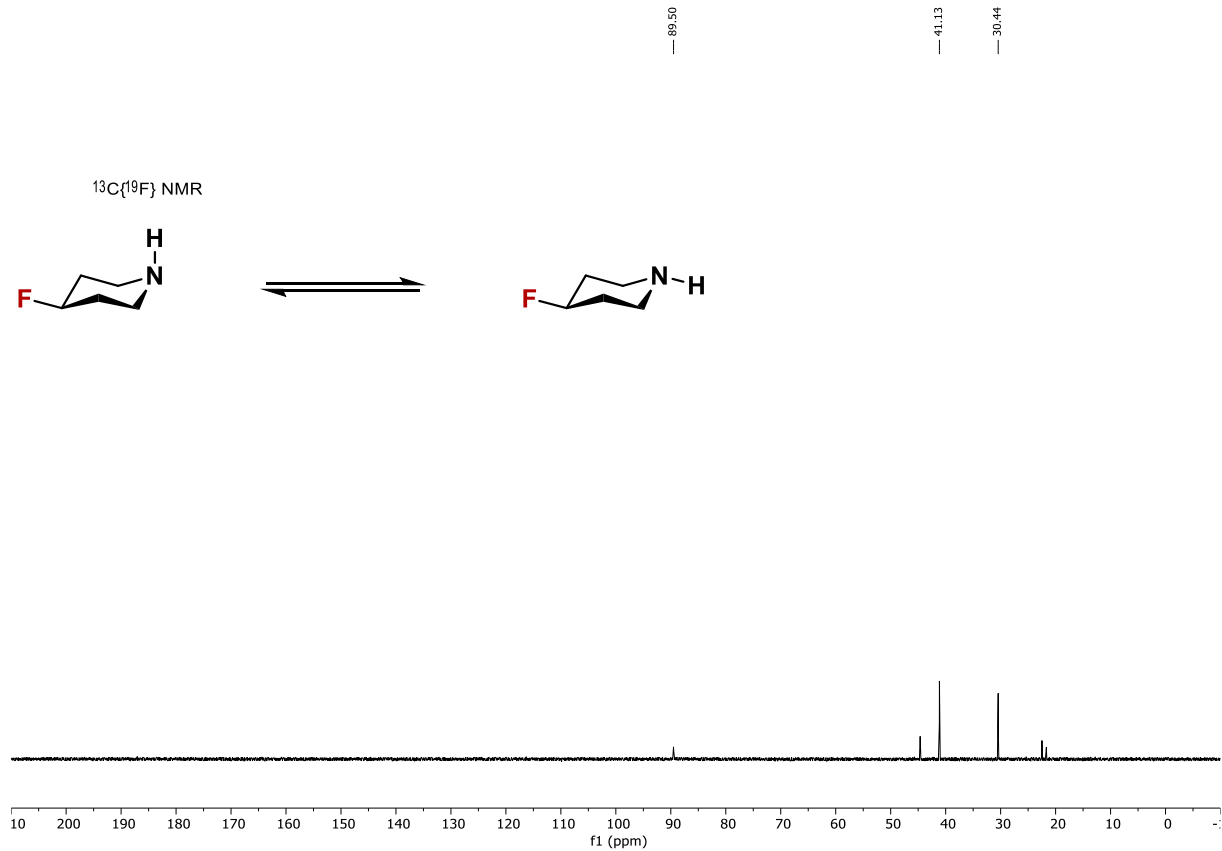

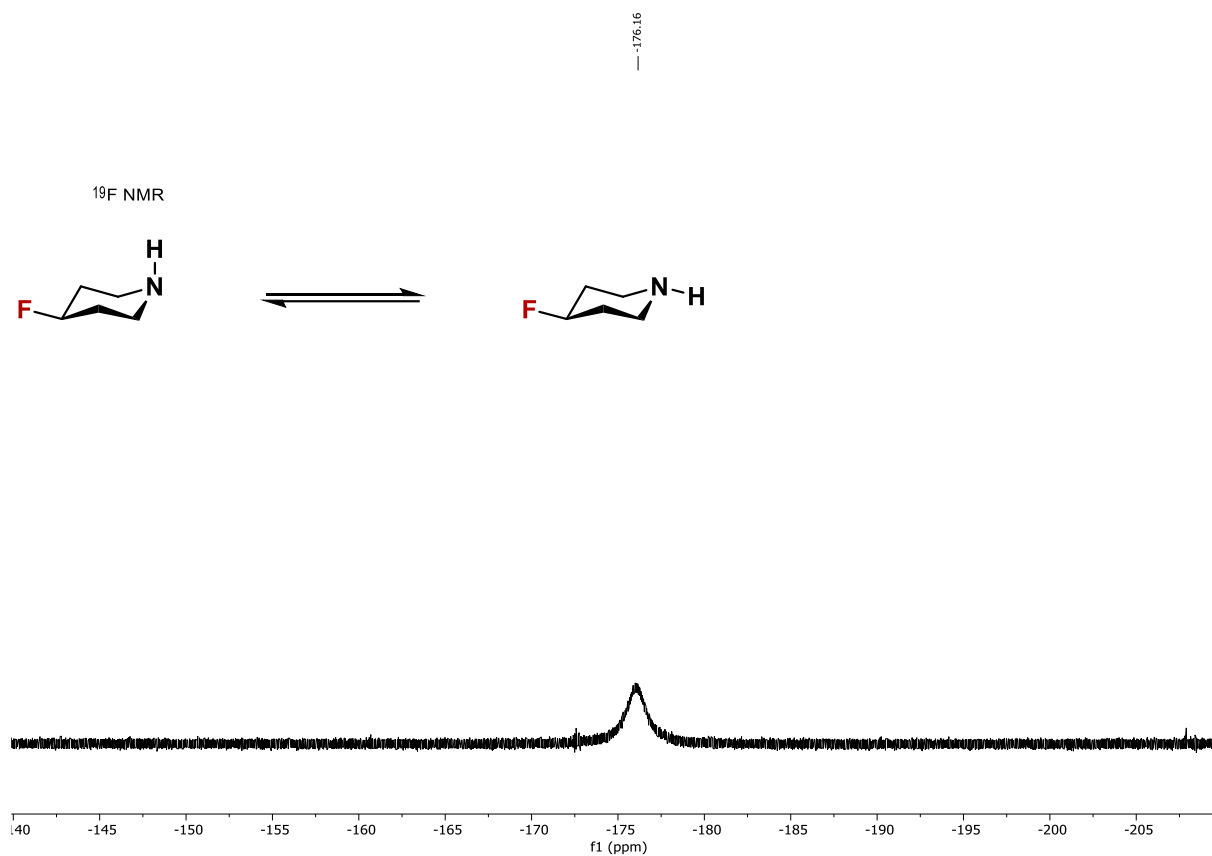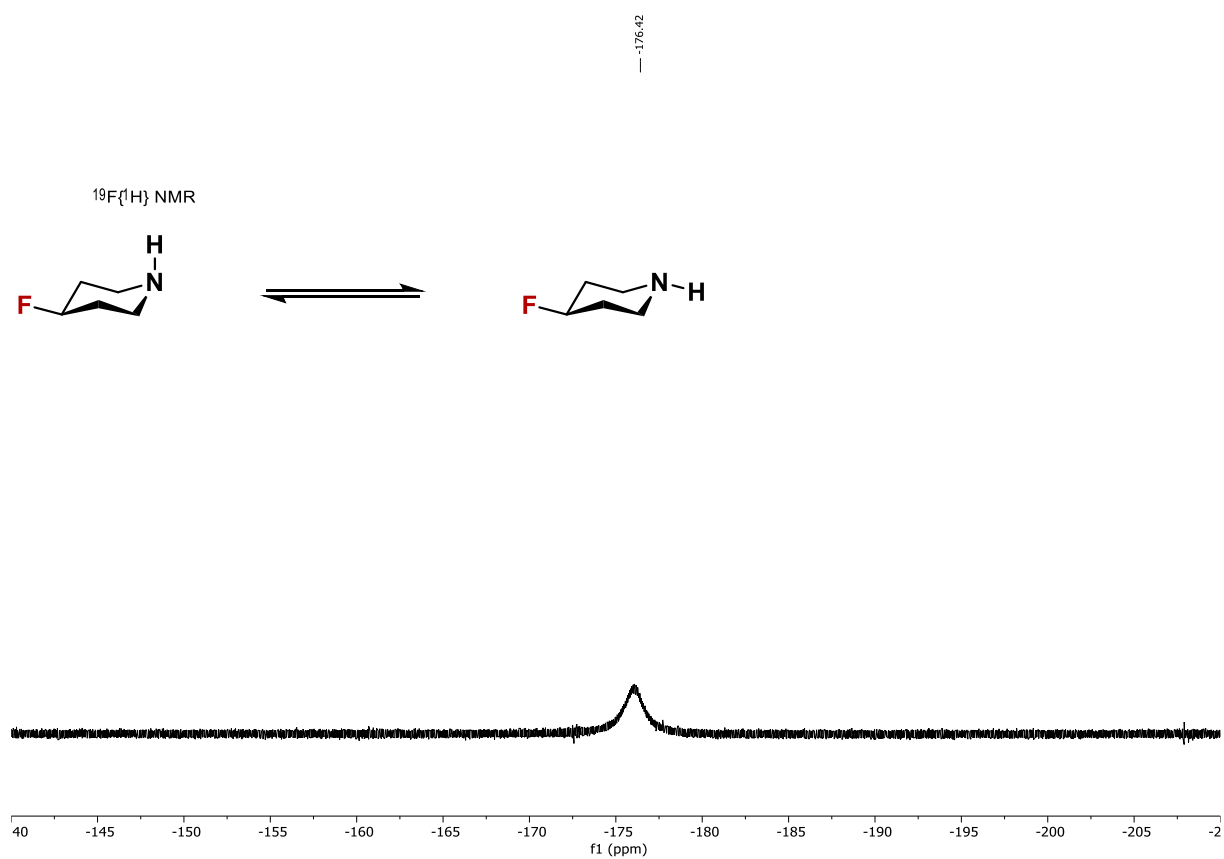

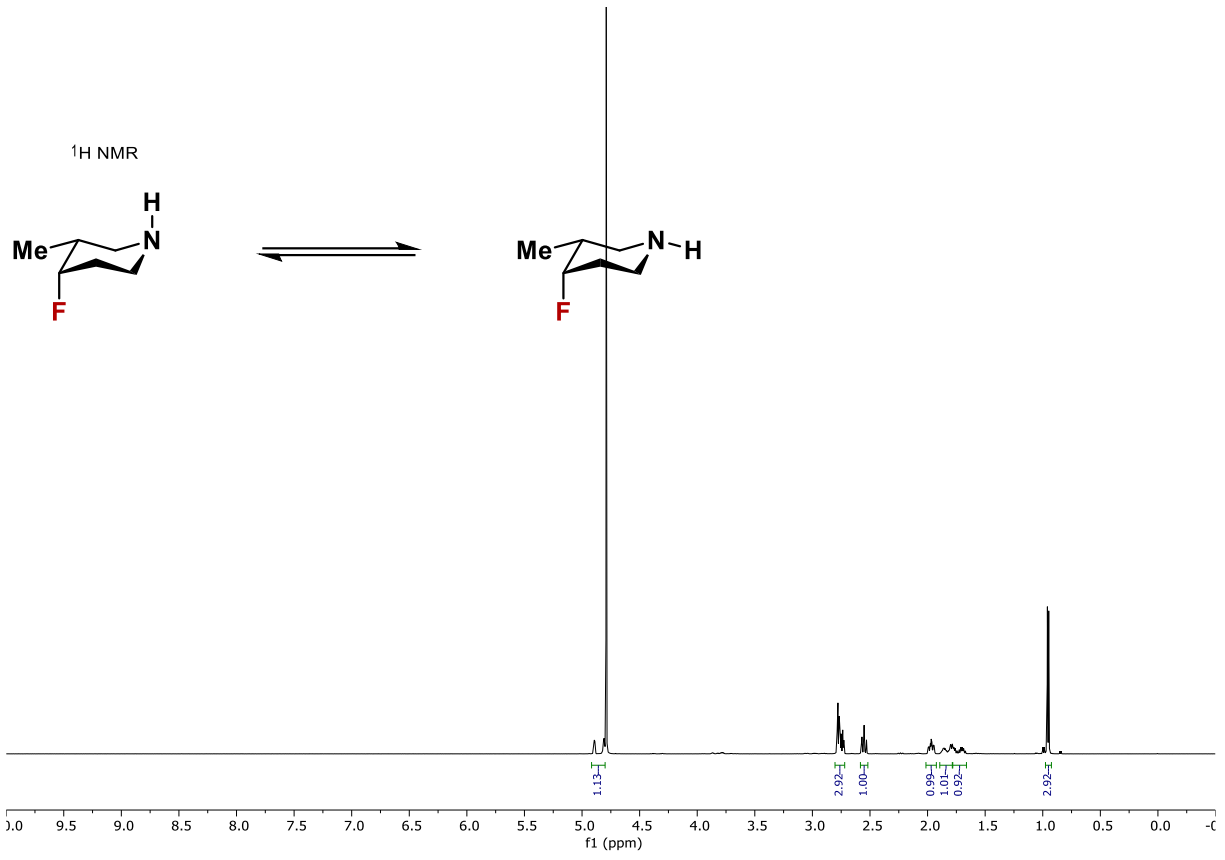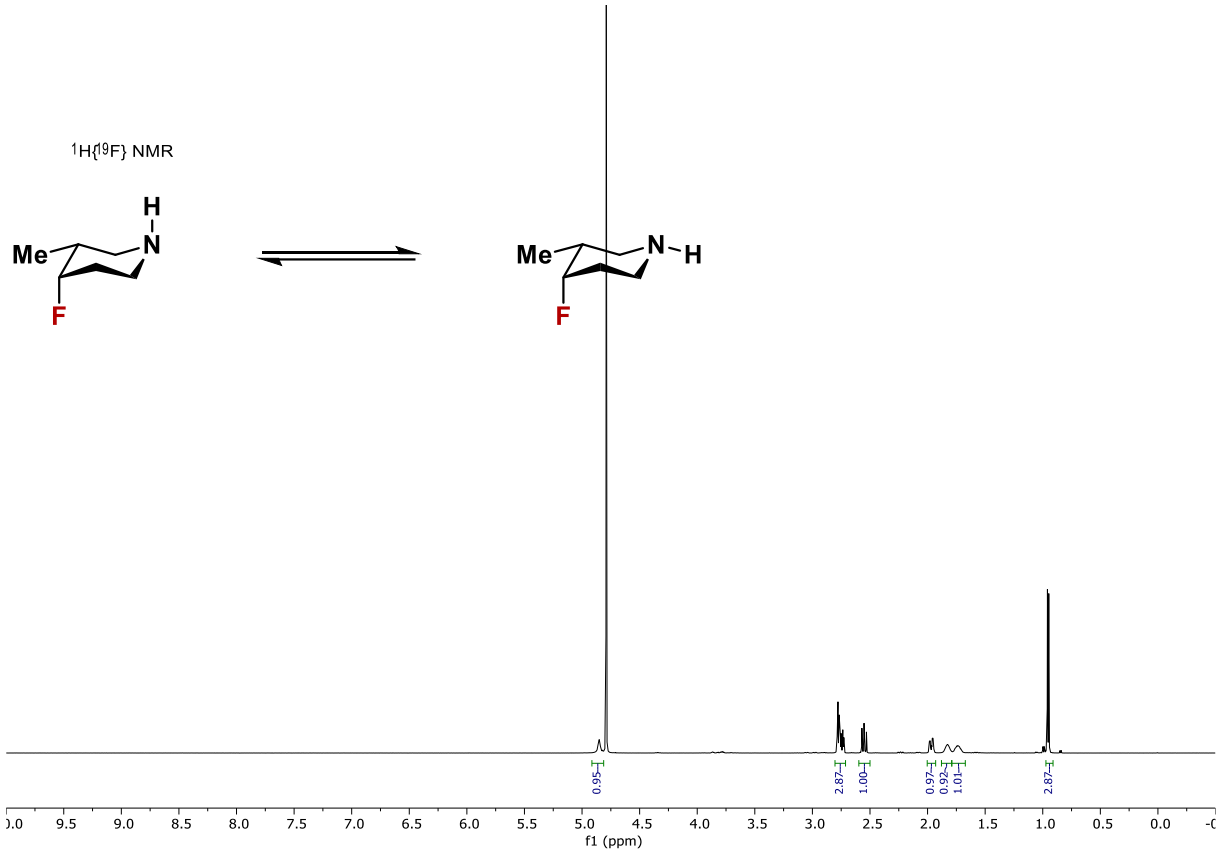

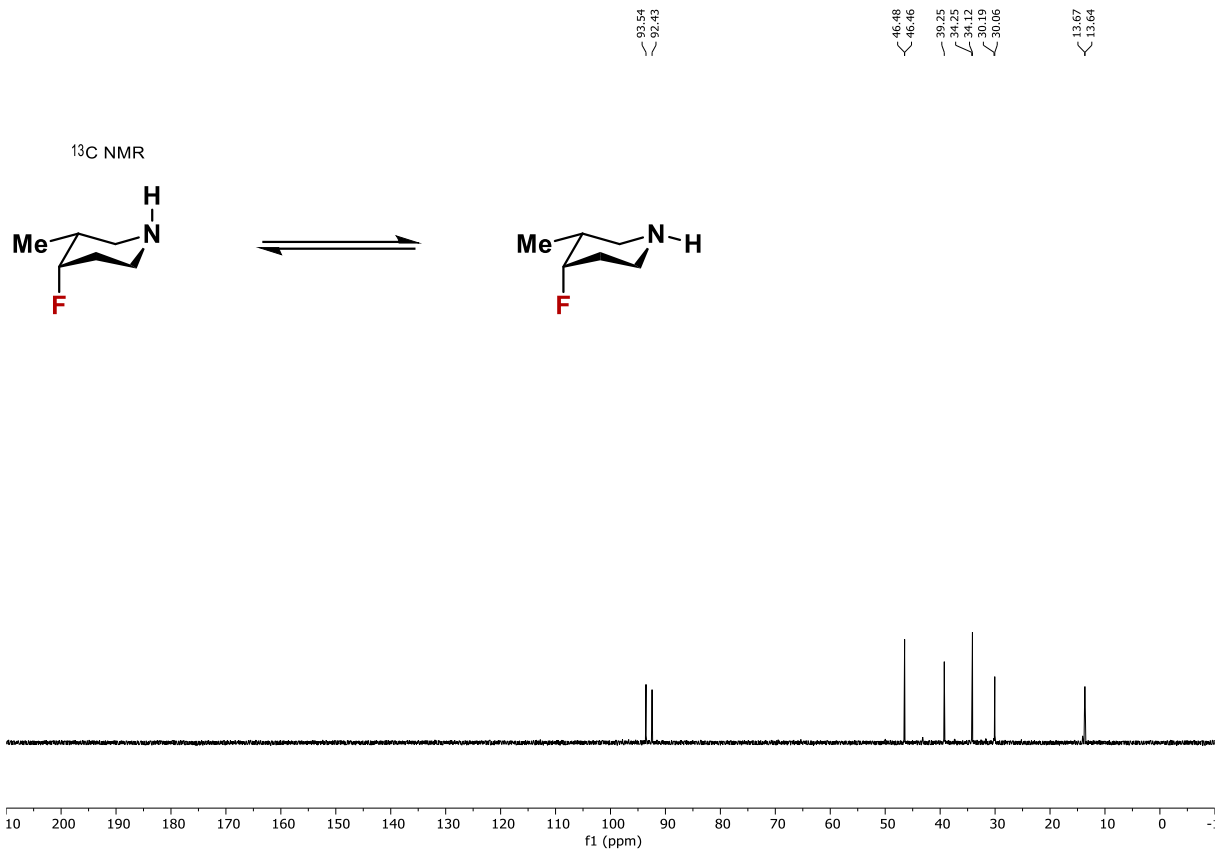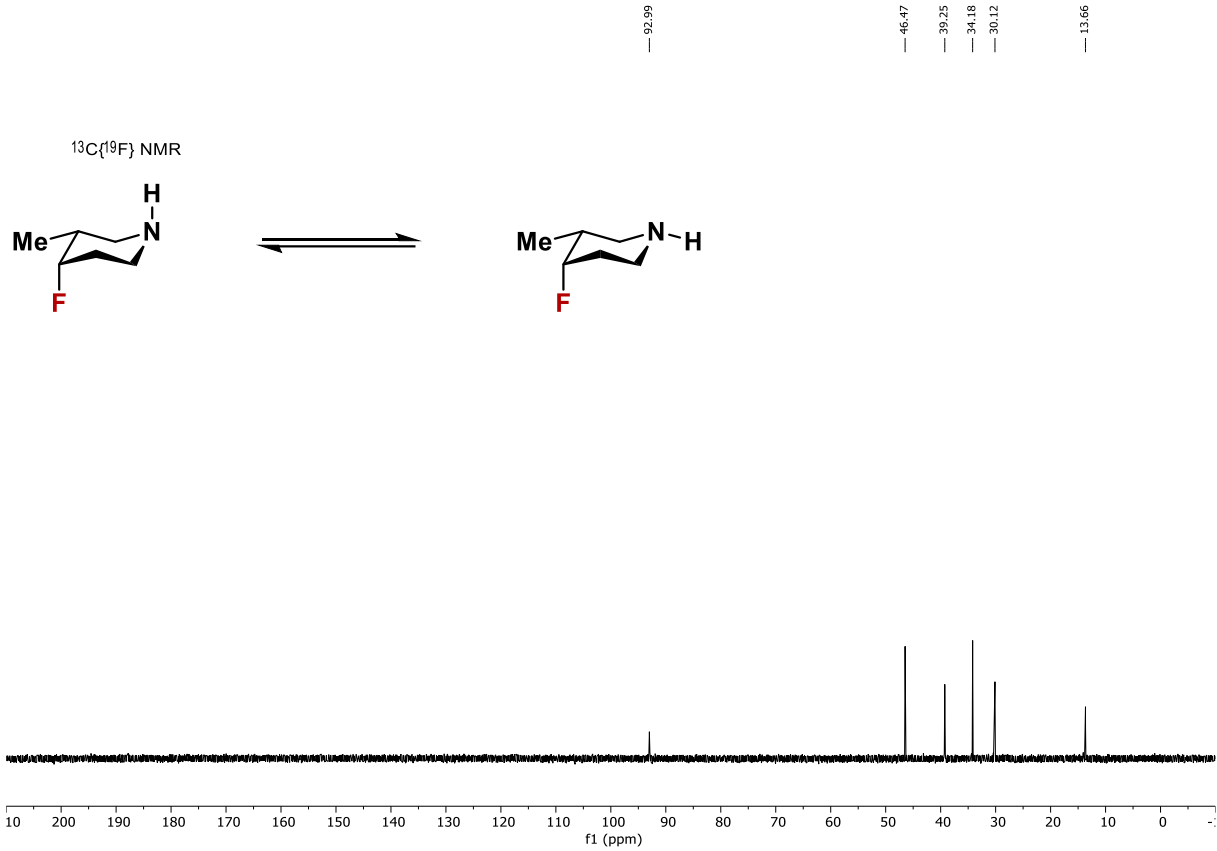

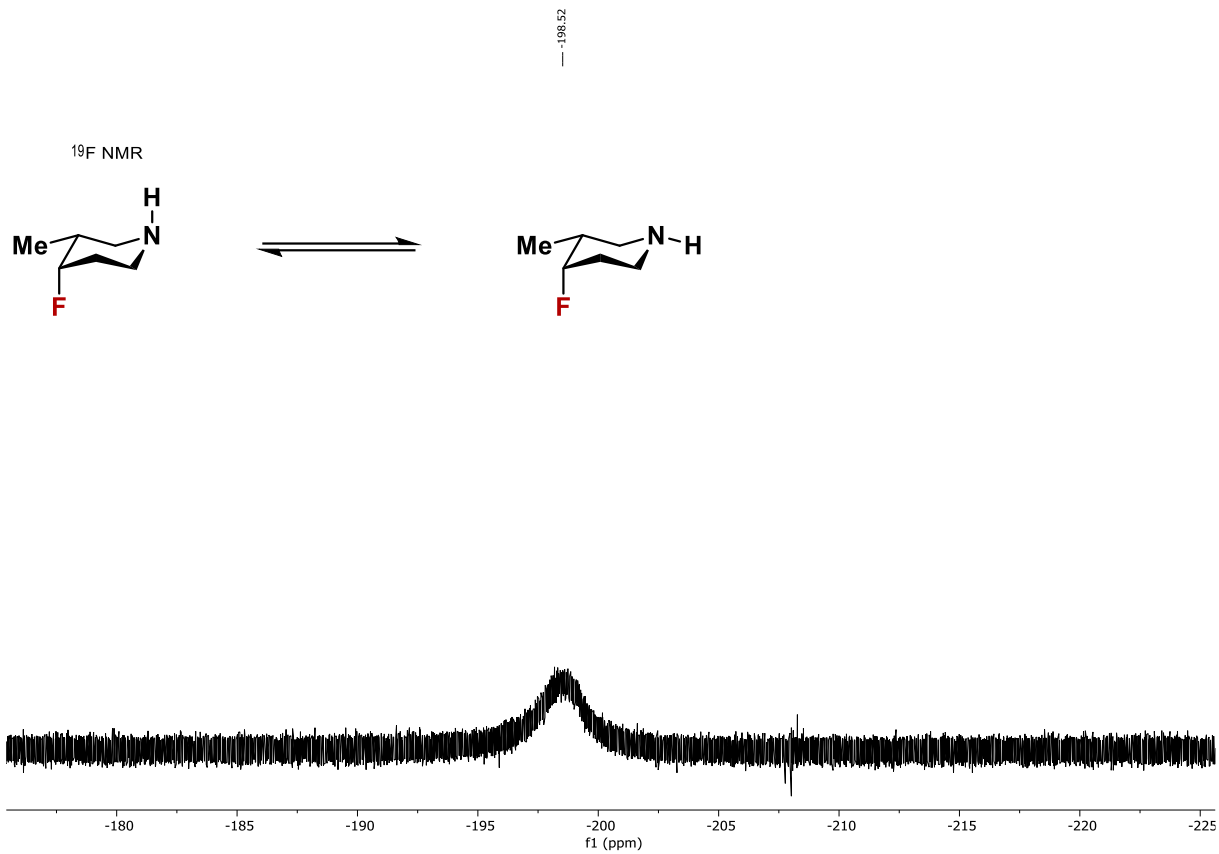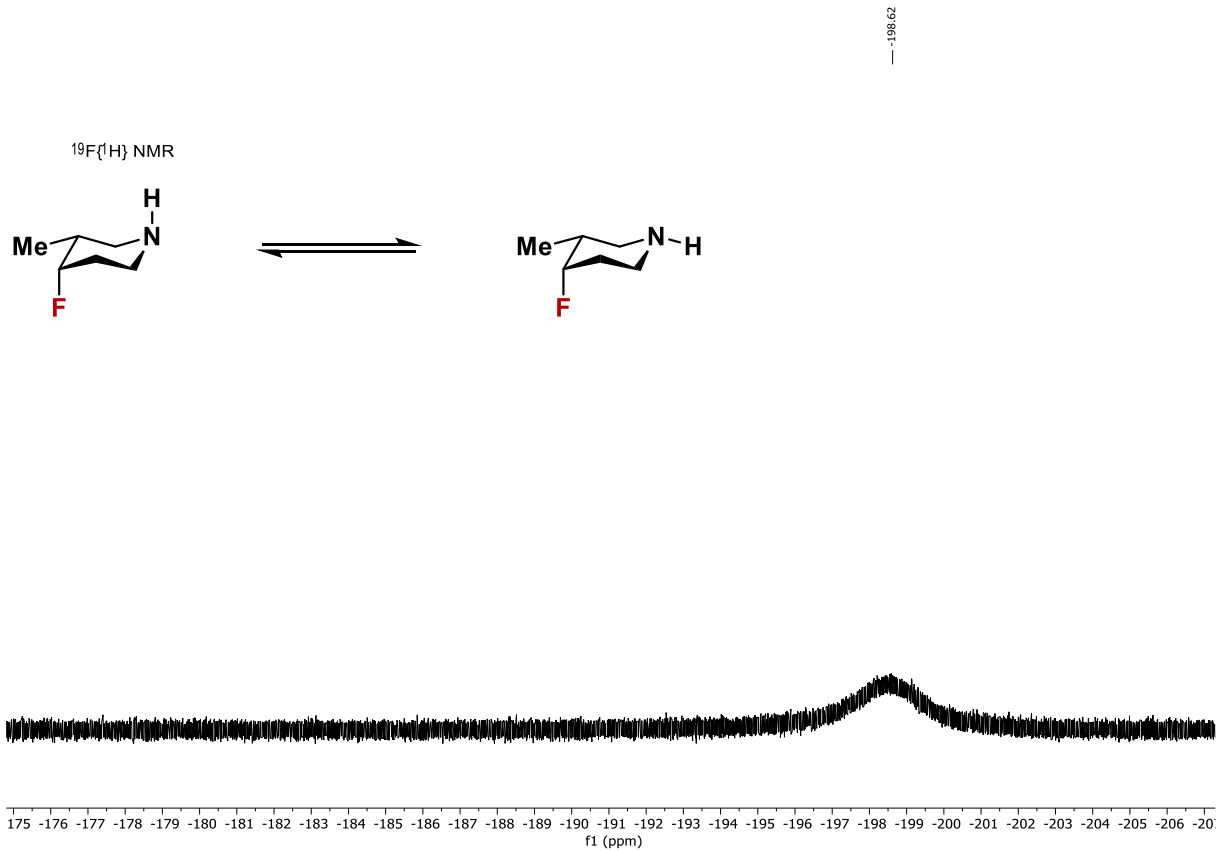

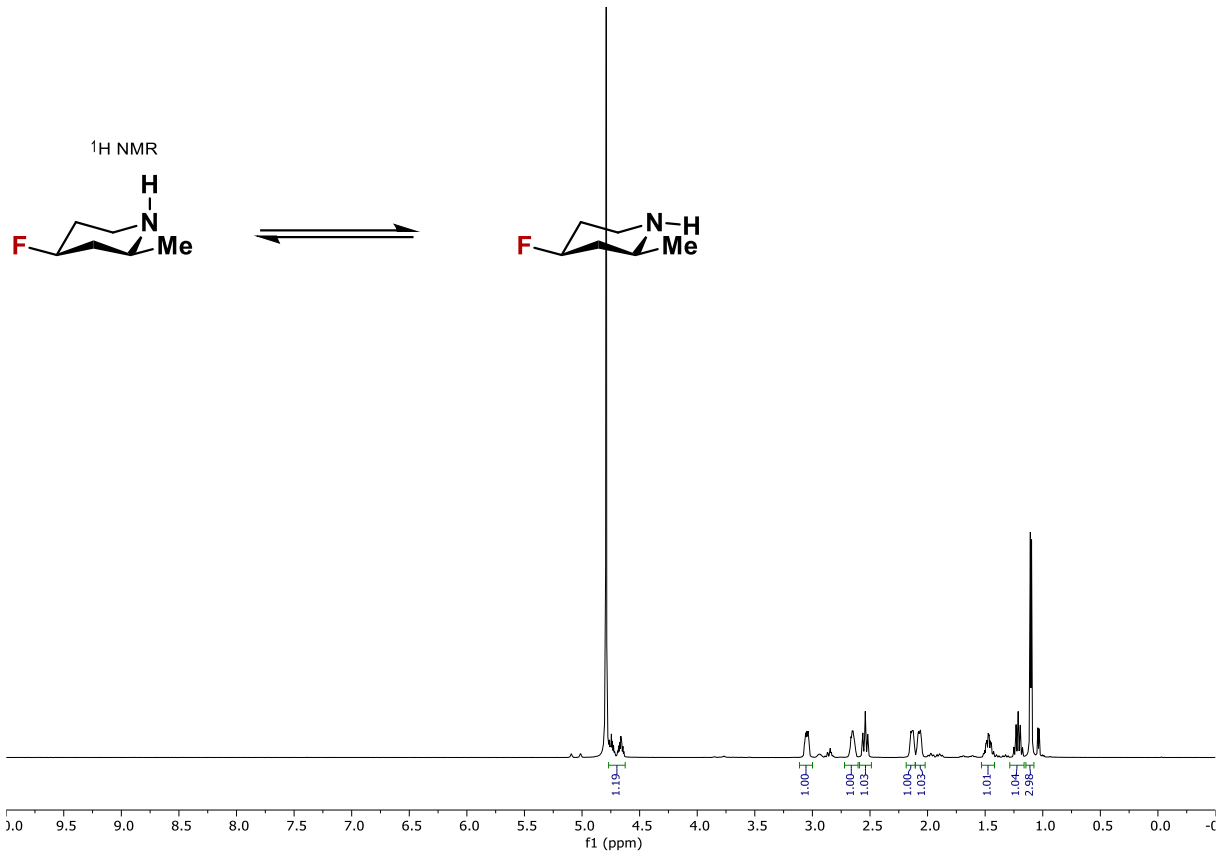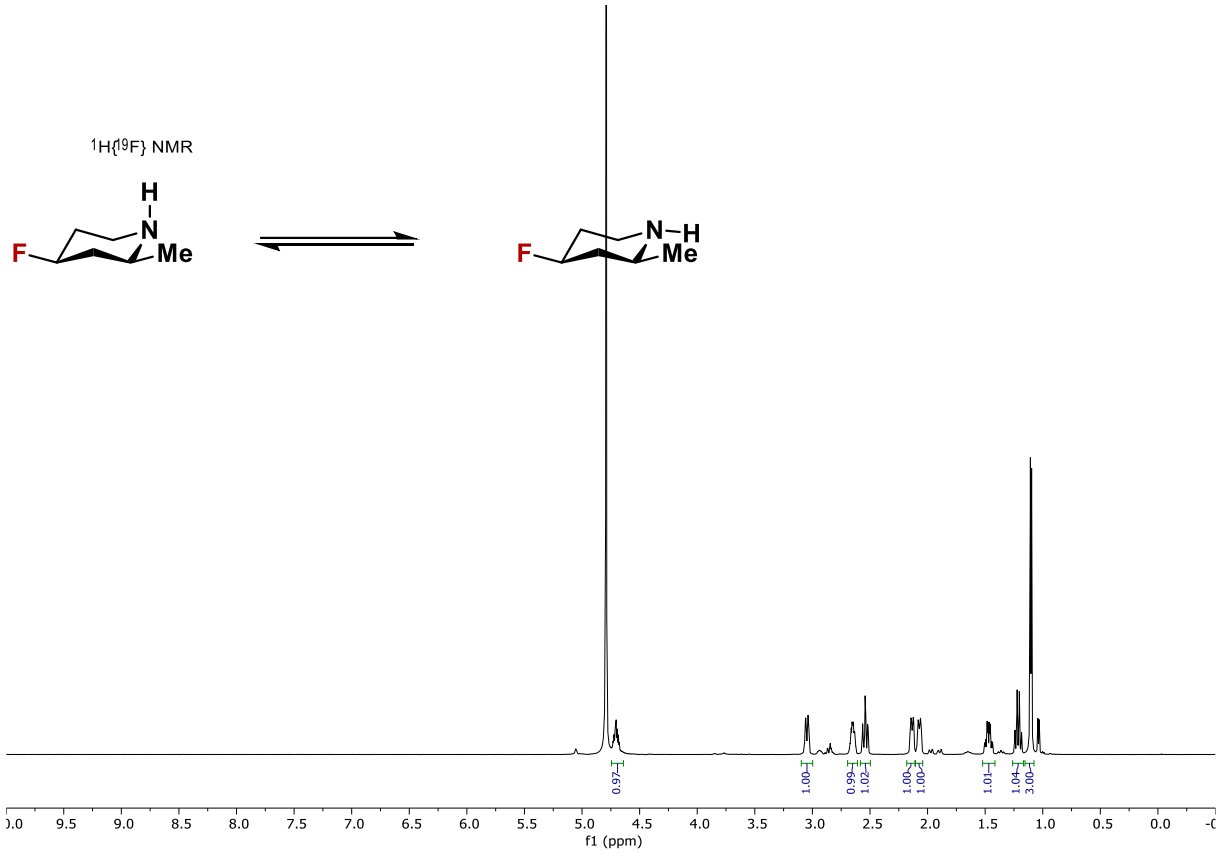

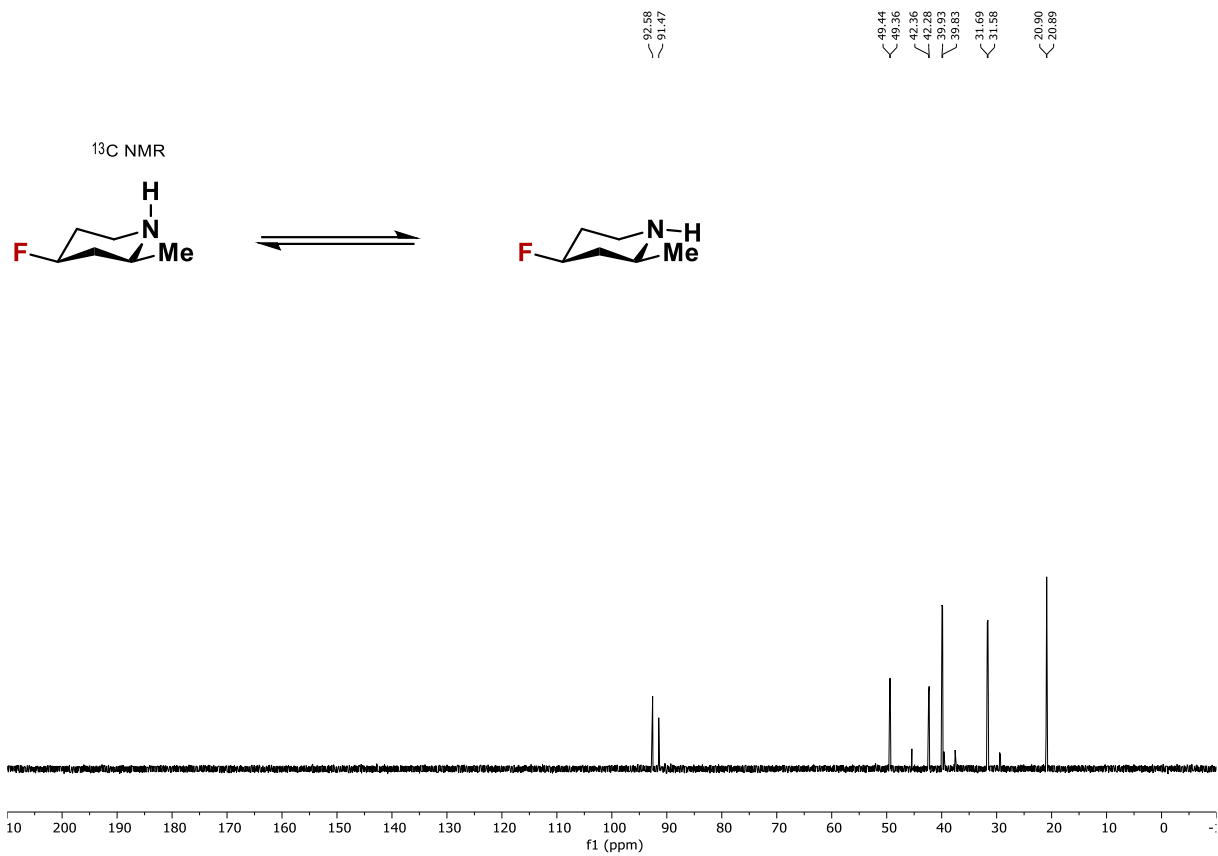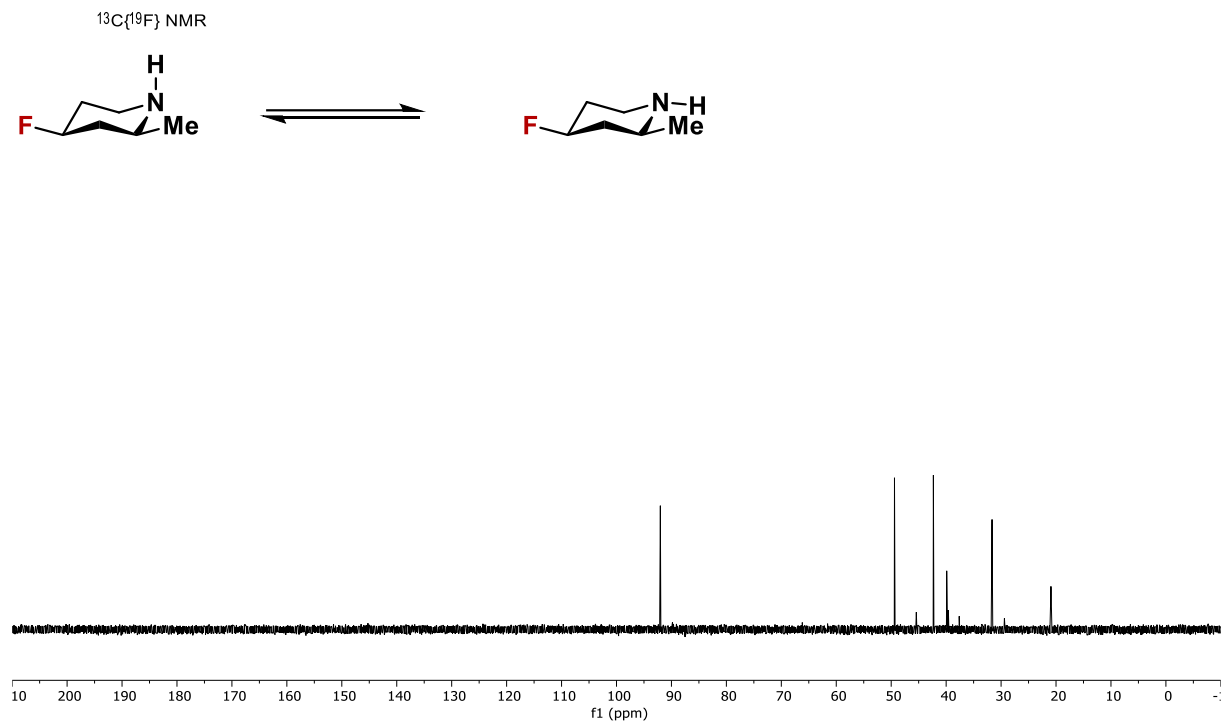



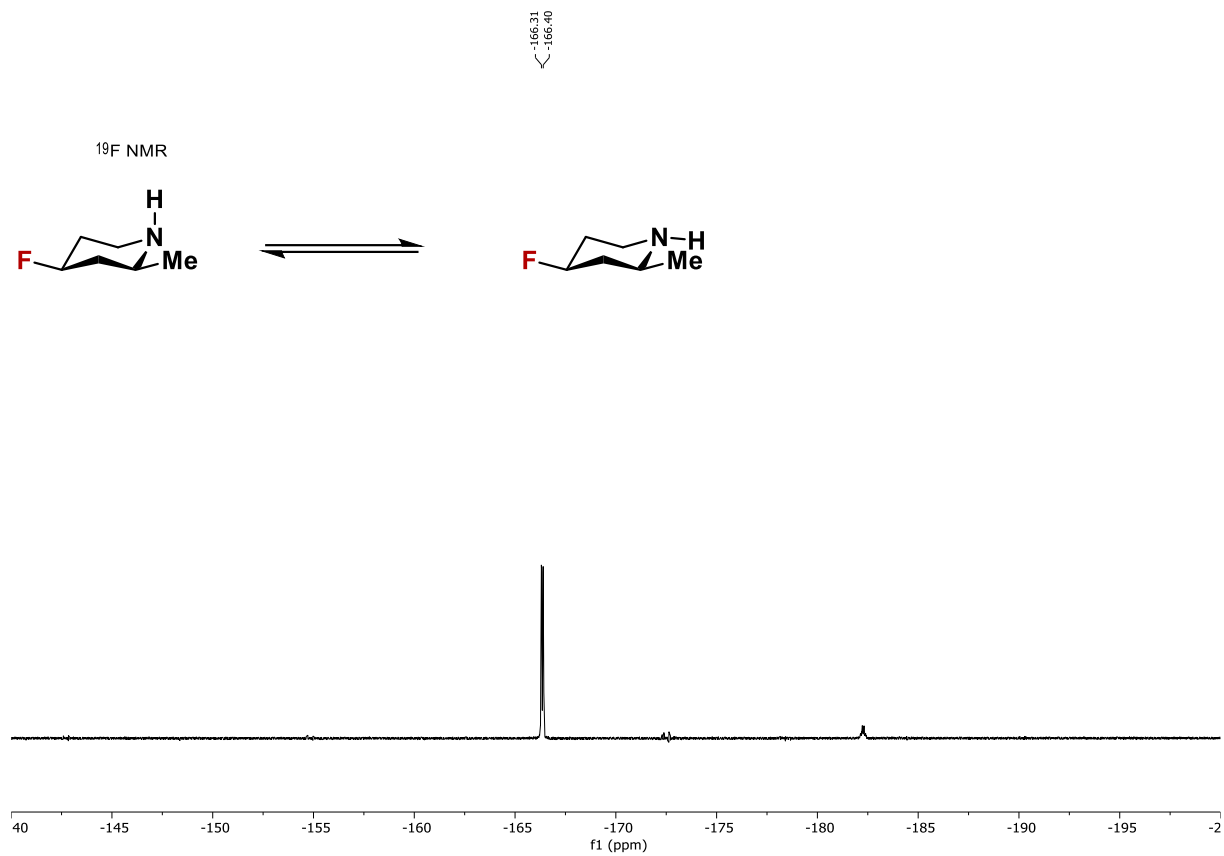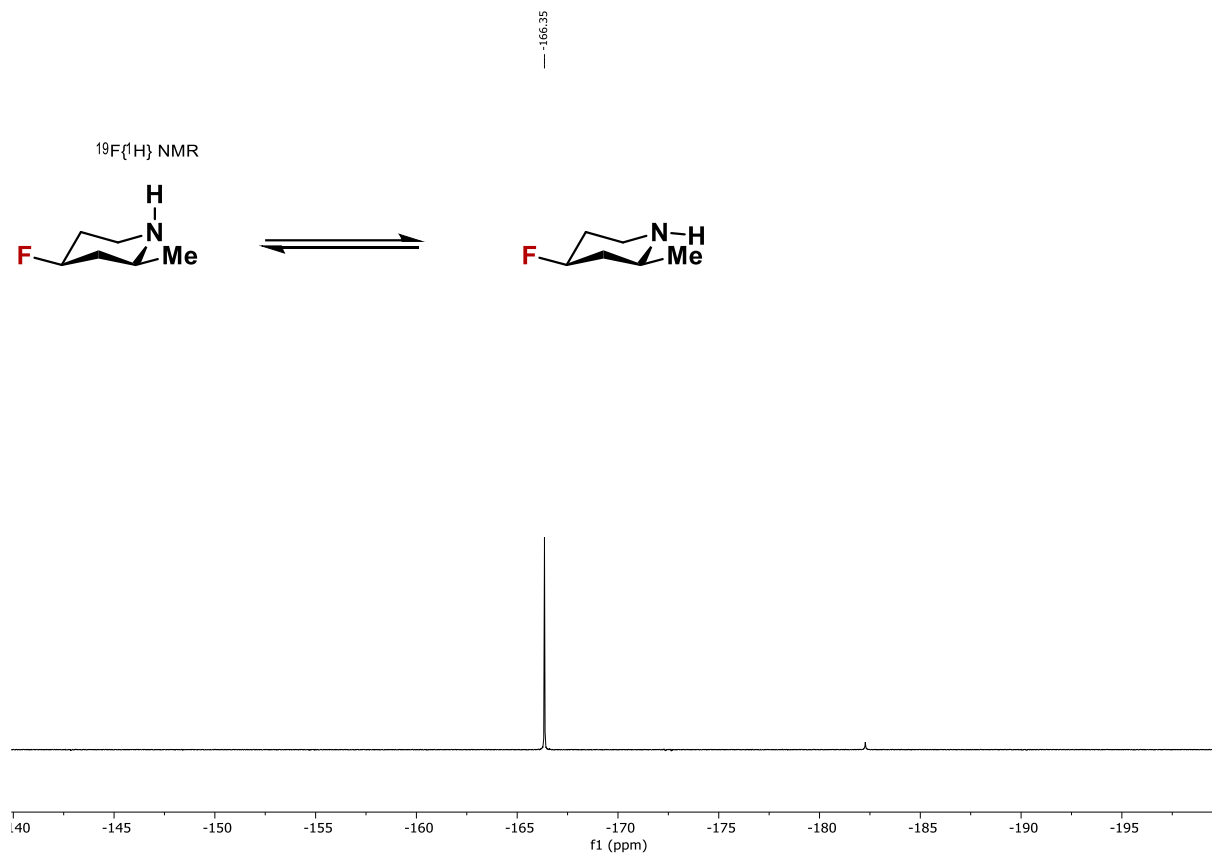

<sup>1</sup>H NMR

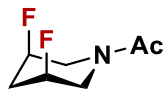

in CDCl<sub>3</sub>

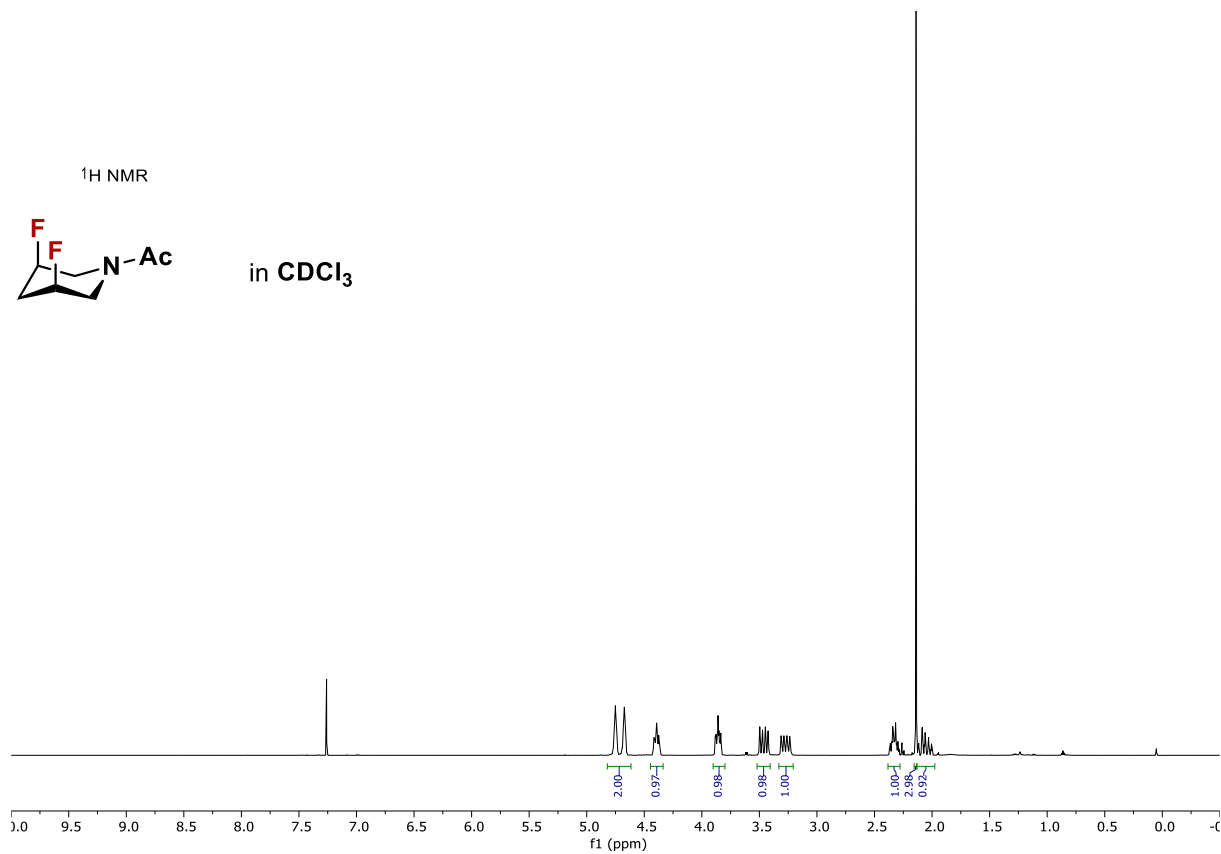

<sup>1</sup>H(<sup>19</sup>F) NMR

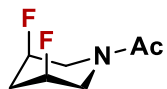

in CDCl<sub>3</sub>

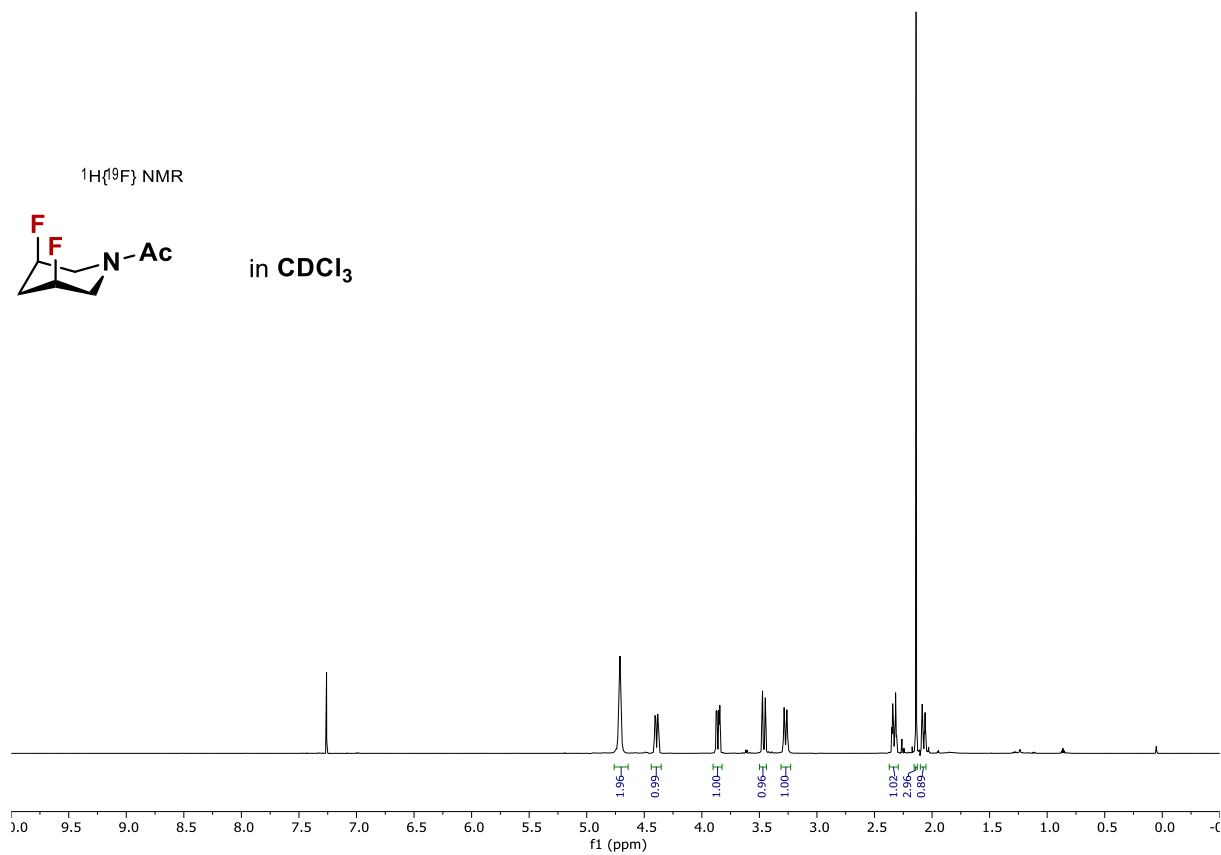

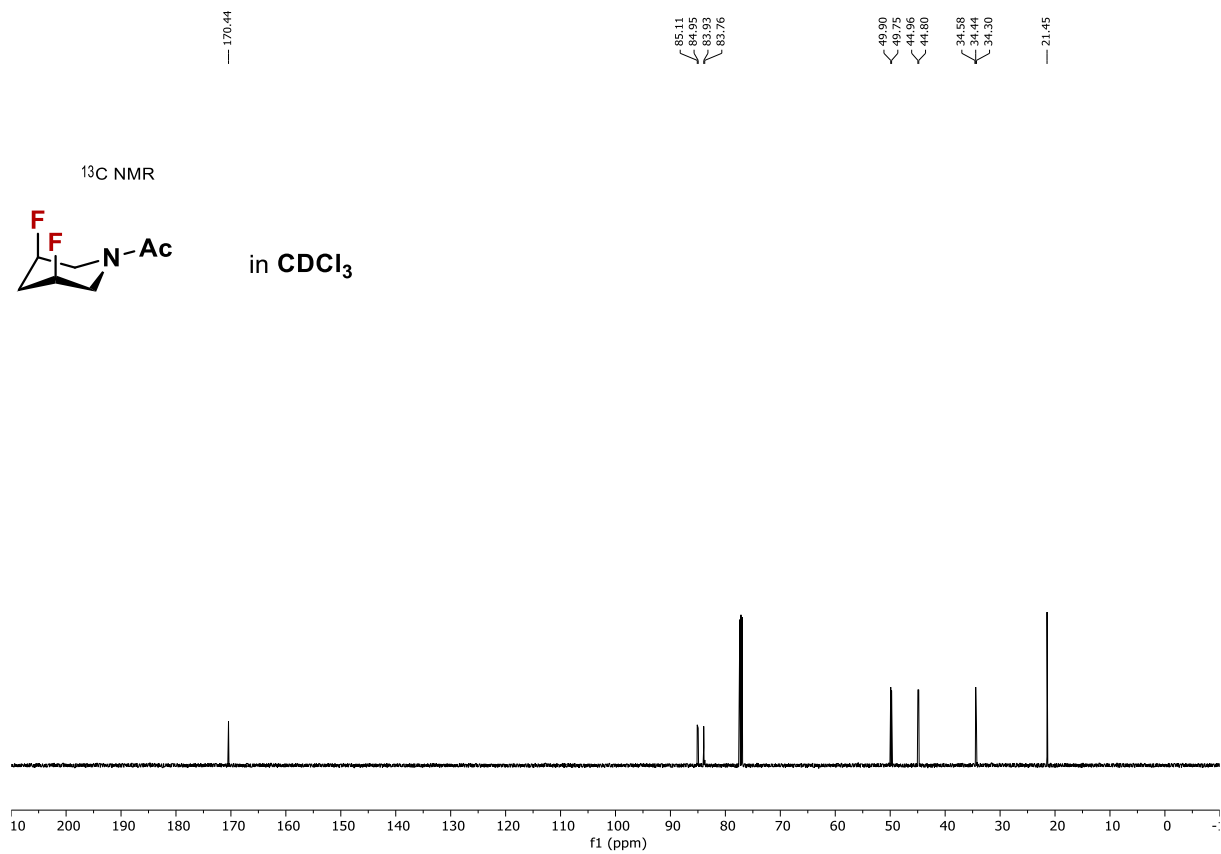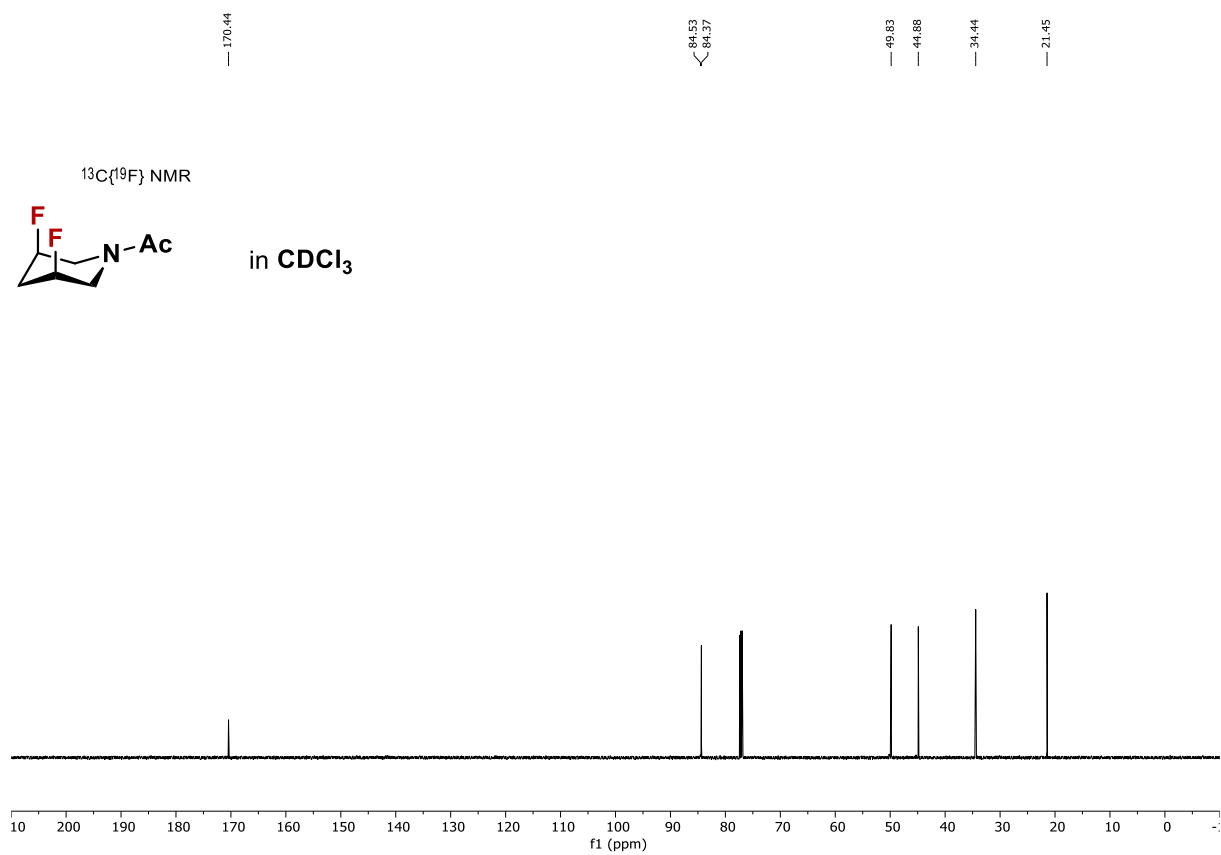

-182.86  
-182.86  
-182.88  
-182.88  
-182.90  
-182.90  
-182.92  
-182.92  
-182.93  
-182.93  
-182.94  
-182.94  
-182.96  
-182.96  
-182.97  
-182.97  
-182.98  
-182.98  
-182.99  
-182.99  
-183.00  
-183.00  
-183.01  
-183.01  
-183.02  
-183.02  
-183.03  
-183.03  
-183.04  
-183.04  
-183.05  
-183.05  
-183.06  
-183.06  
-183.07  
-183.07  
-183.08  
-183.08  
-183.10  
-183.10  
-183.11  
-183.11  
-183.12  
-183.12  
-183.13  
-183.13  
-183.14  
-183.14  
-183.15  
-183.15  
-183.16  
-183.16  
-183.17  
-183.17  
-183.19  
-183.19  
-183.20  
-183.20  
-183.22  
-183.22

<sup>19</sup>F NMR

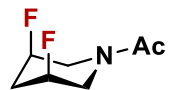

in CDCl<sub>3</sub>

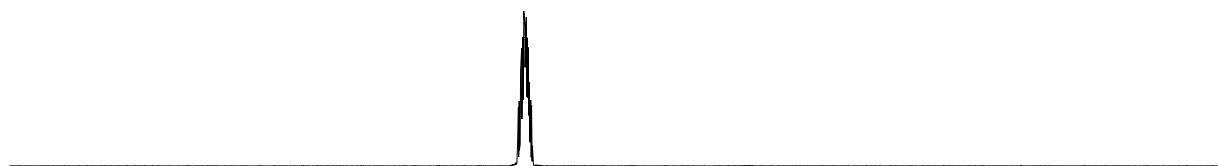

-171 -172 -173 -174 -175 -176 -177 -178 -179 -180 -181 -182 -183 -184 -185 -186 -187 -188 -189 -190 -191 -192 -193 -194 -195 -196 -197 -198 -199 -2

f1 (ppm)

-182.98  
-183.00  
-183.09  
-183.11

<sup>19</sup>F{<sup>1</sup>H} NMR

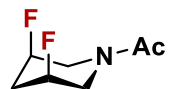

in CDCl<sub>3</sub>

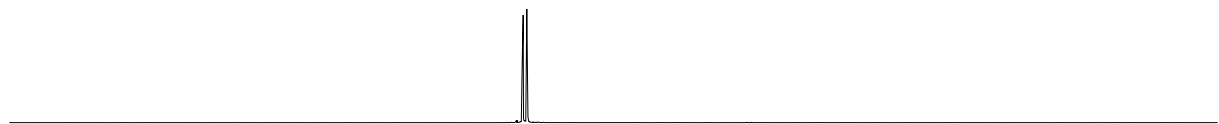

-171 -172 -173 -174 -175 -176 -177 -178 -179 -180 -181 -182 -183 -184 -185 -186 -187 -188 -189 -190 -191 -192 -193 -194 -195 -196 -197 -198 -199 -2

f1 (ppm)

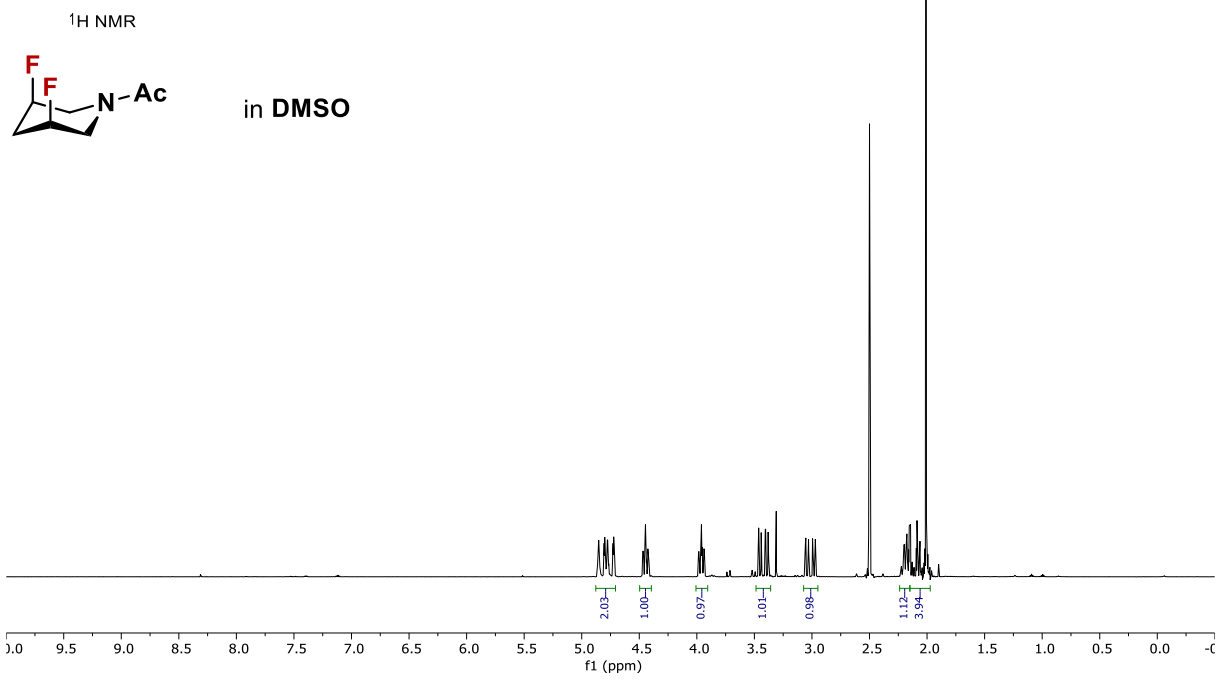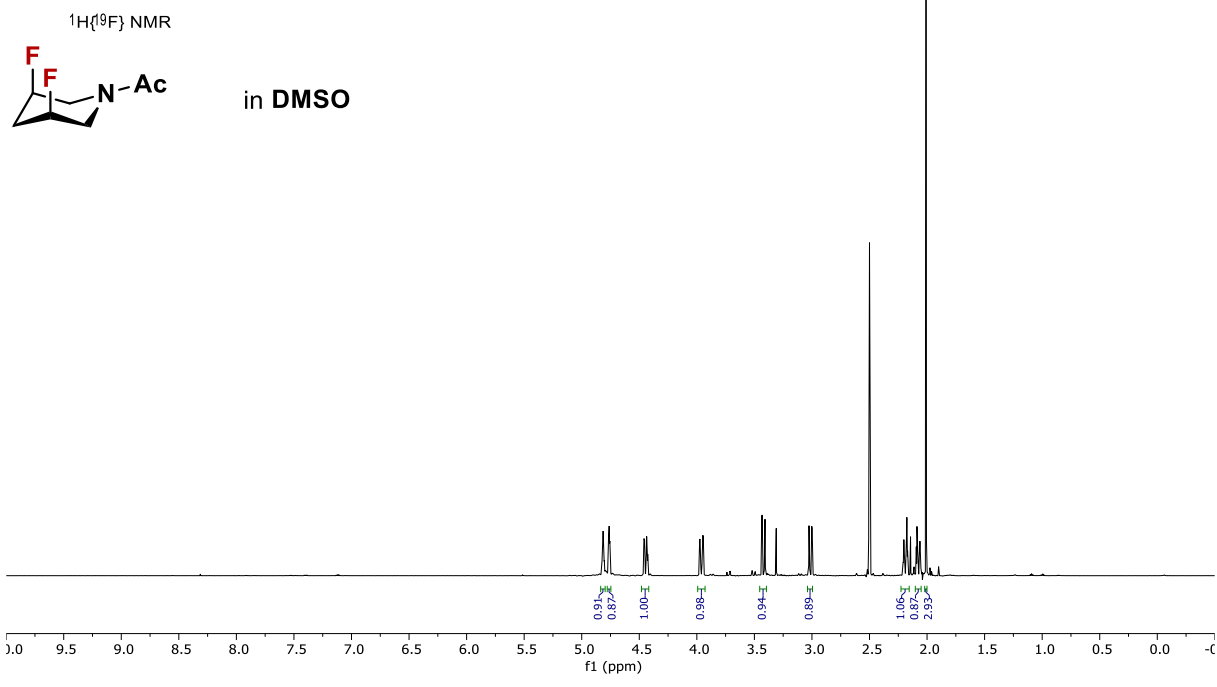

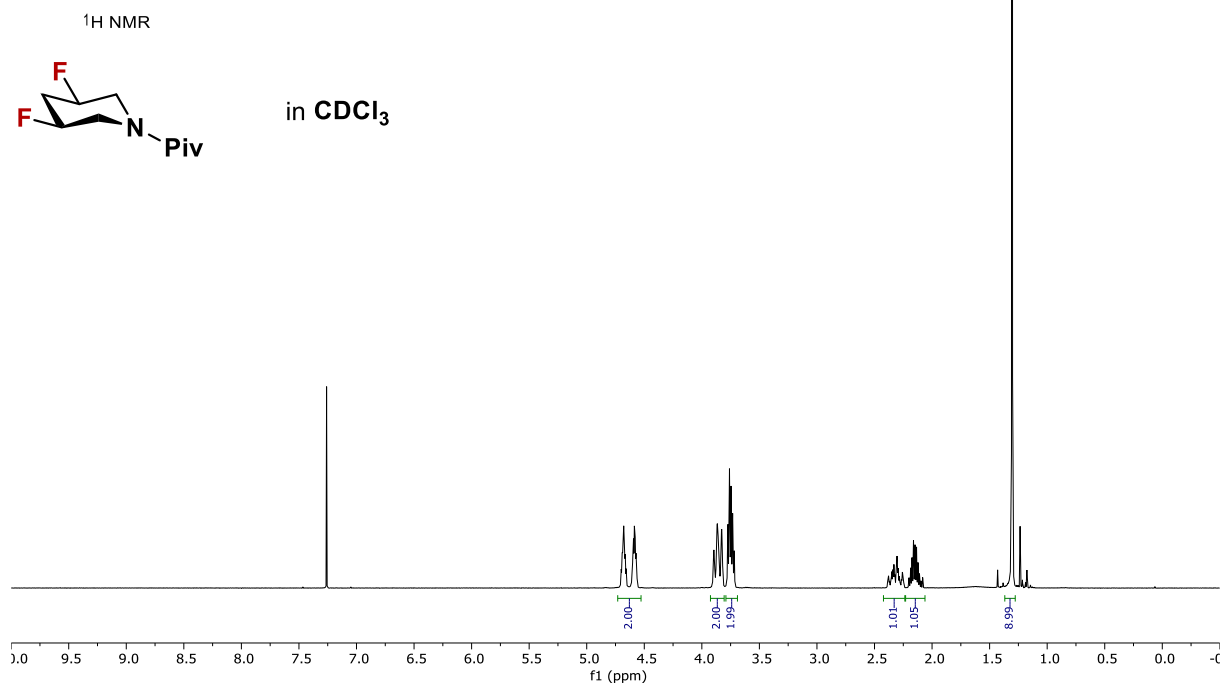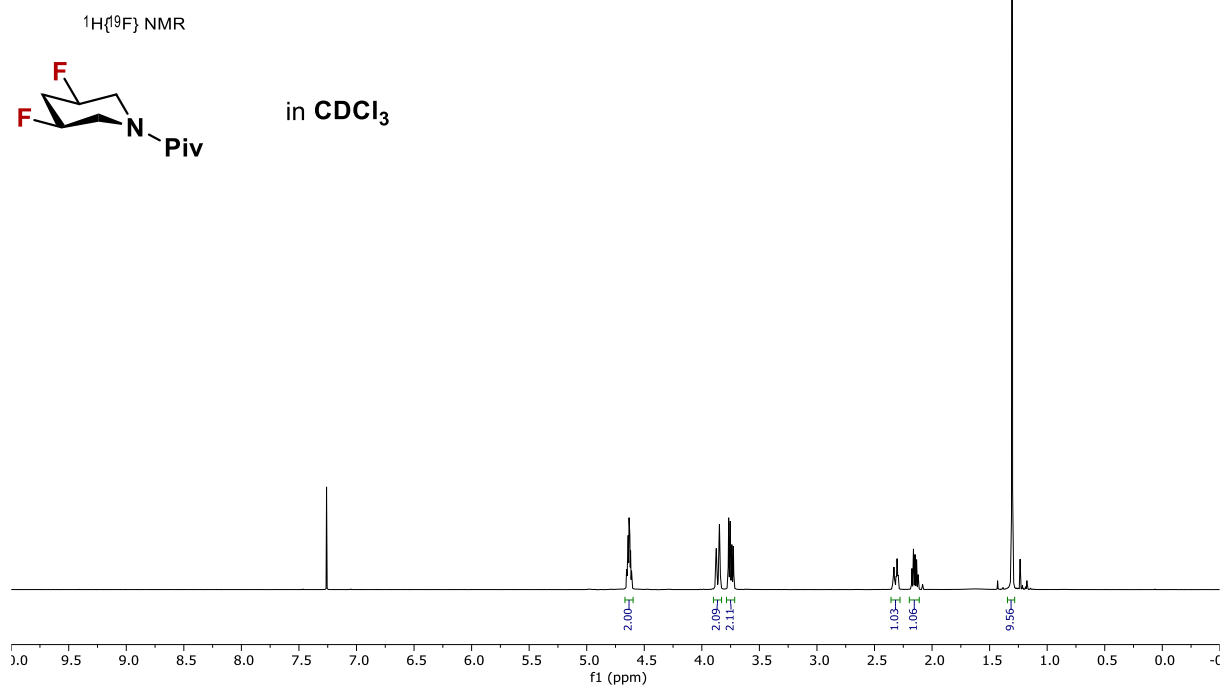

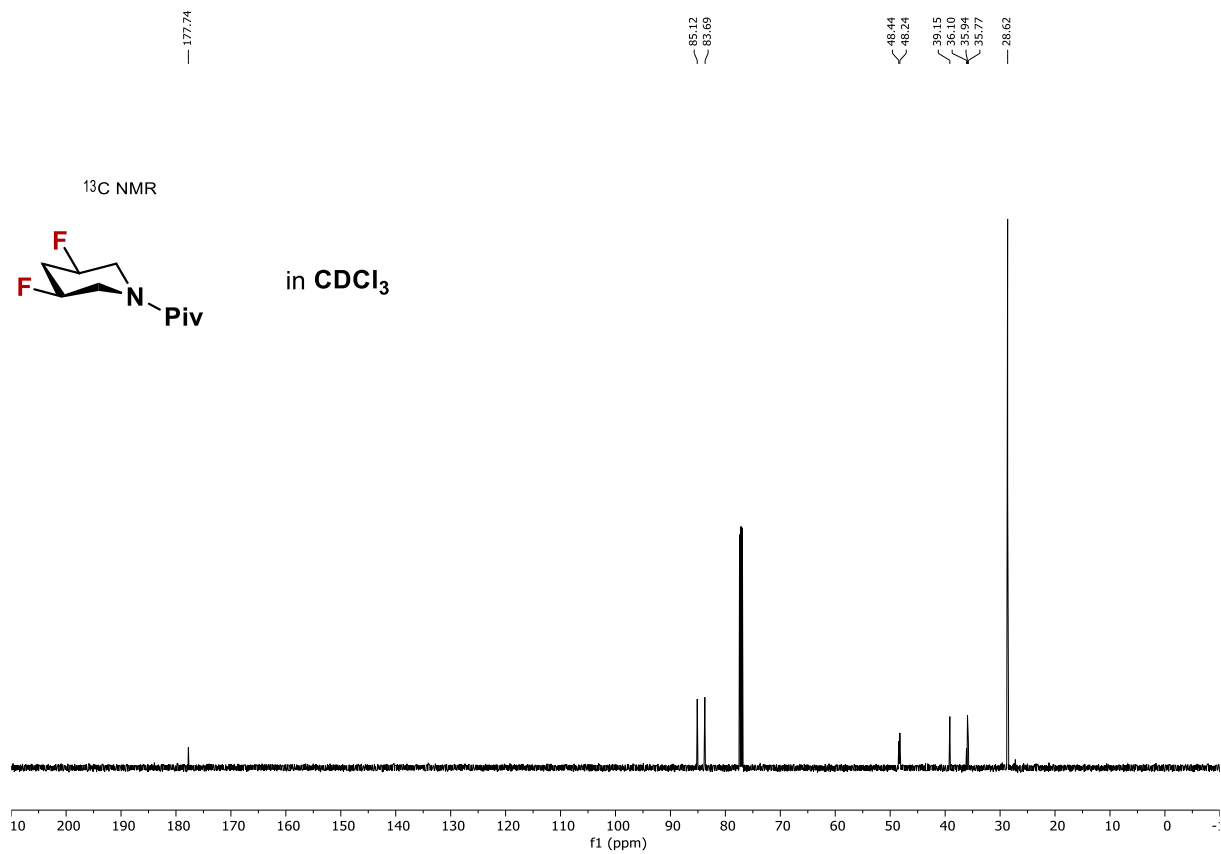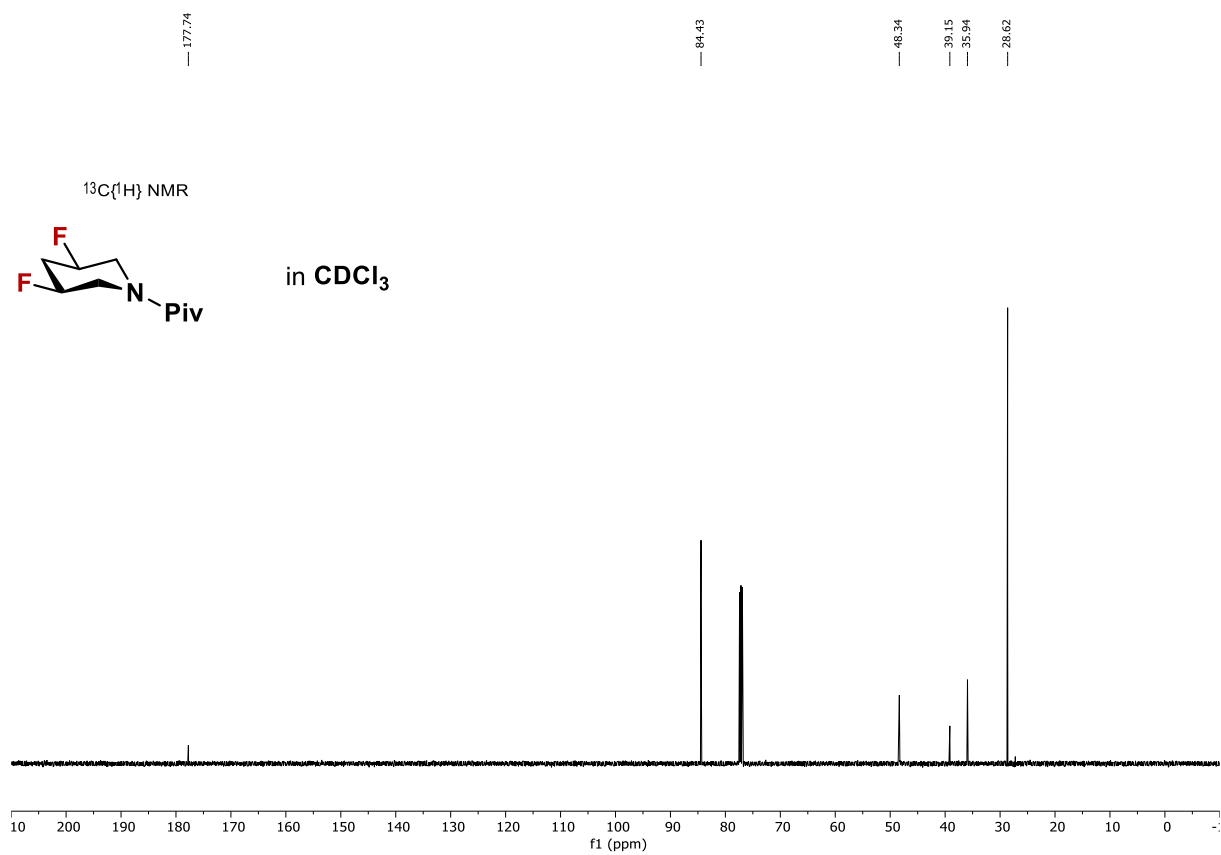

-182.96  
-183.00  
-183.01  
-183.02  
-183.03  
-183.04  
-183.05  
-183.06  
-183.07  
-183.08  
-183.09  
-183.10  
-183.11  
-183.12  
-183.13  
-183.14  
-183.15  
-183.16  
-183.17  
-183.18  
-183.19  
-183.20  
-183.21  
-183.22  
-183.24

<sup>19</sup>F NMR

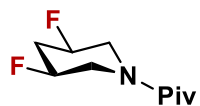

in CDCl<sub>3</sub>

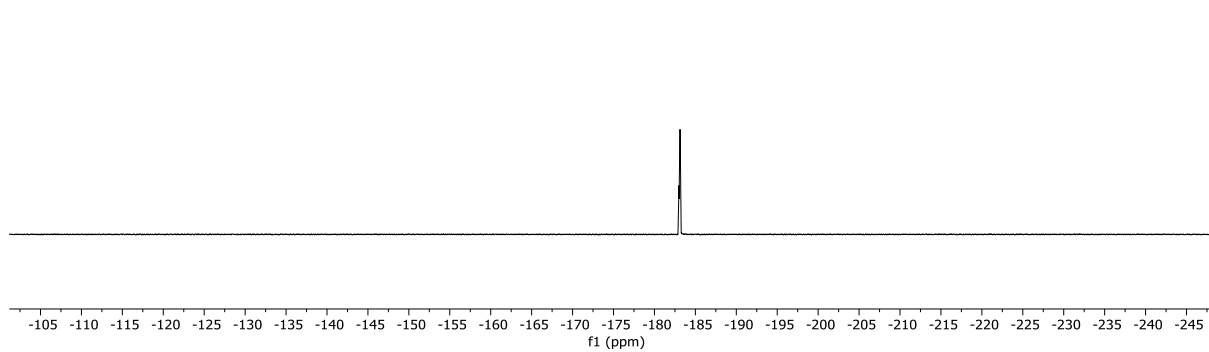

-183.11

<sup>19</sup>F{<sup>1</sup>H} NMR

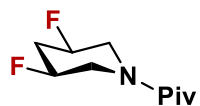

in CDCl<sub>3</sub>

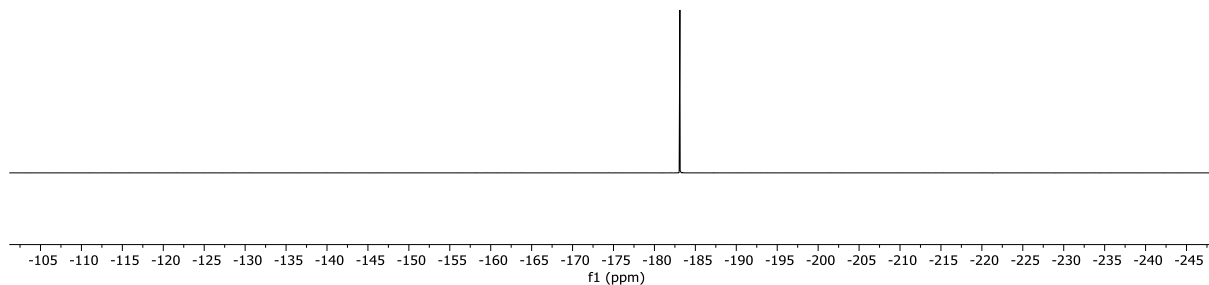



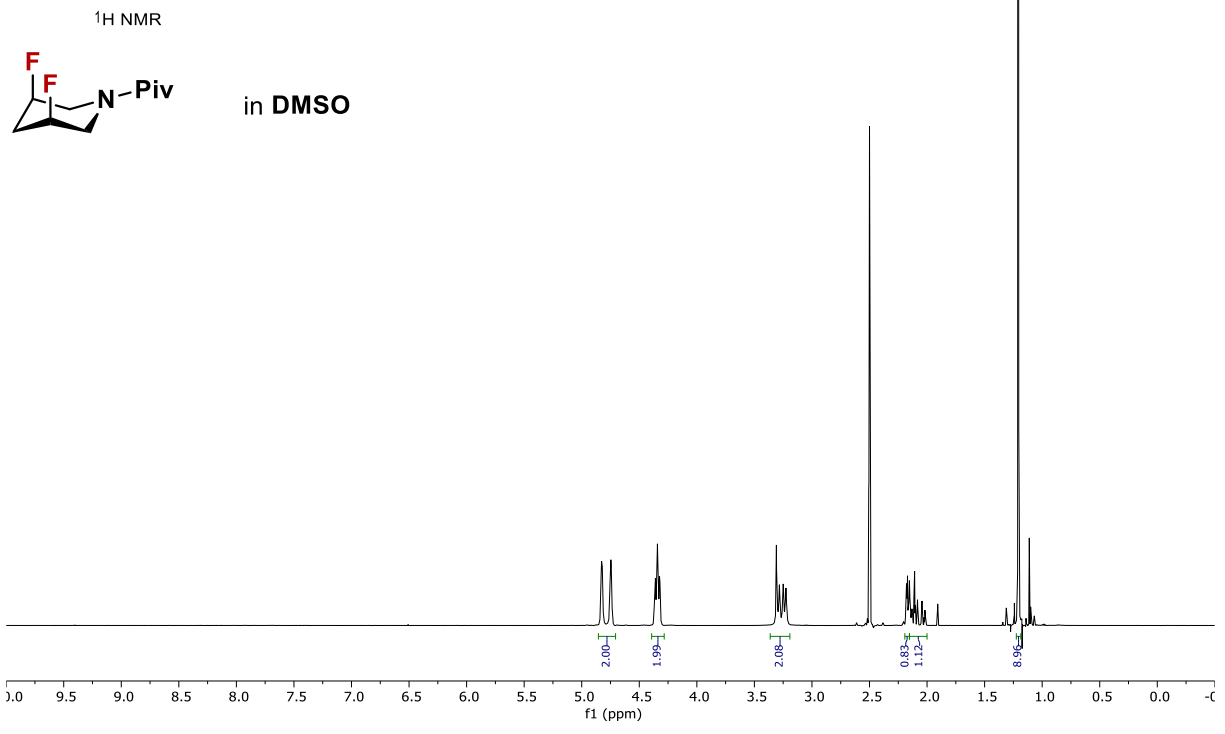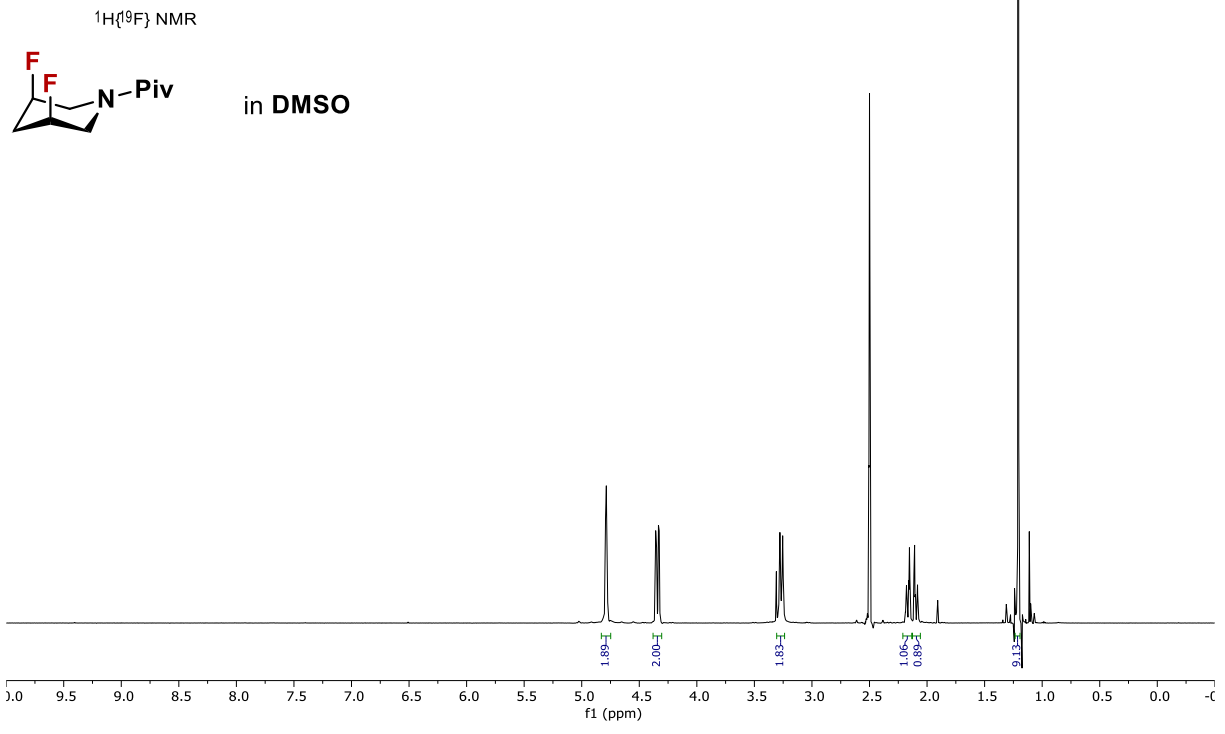

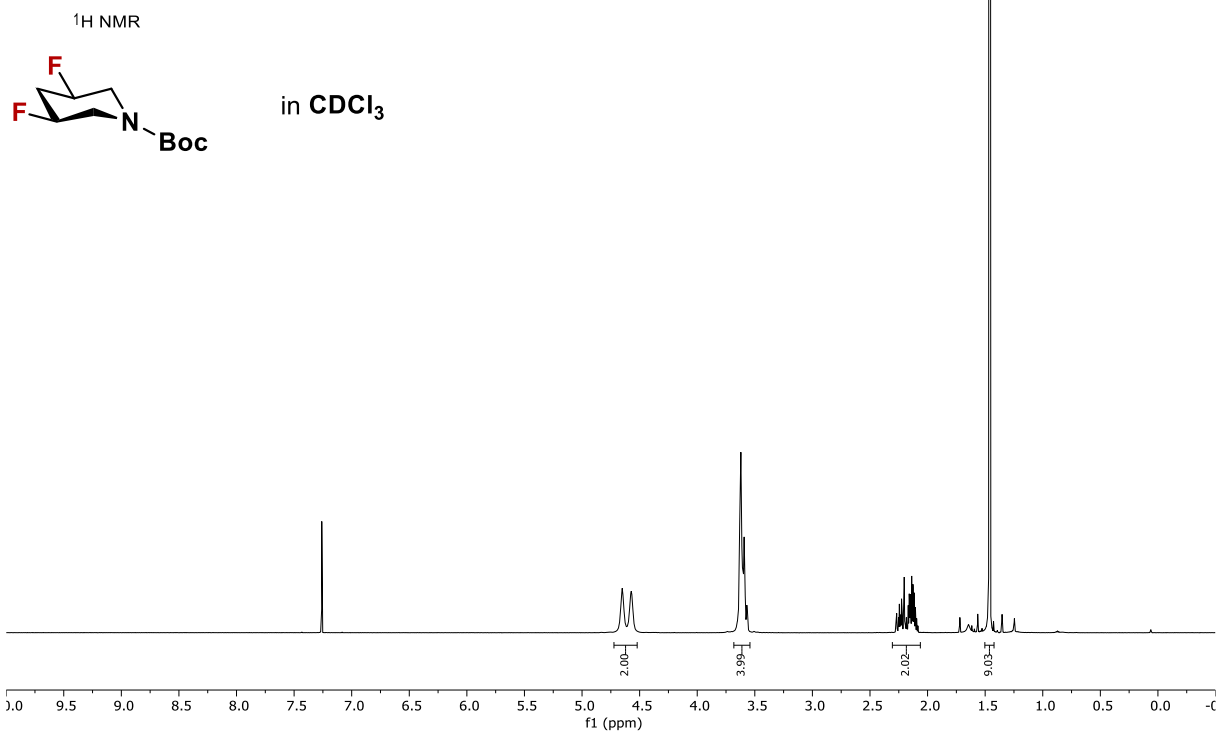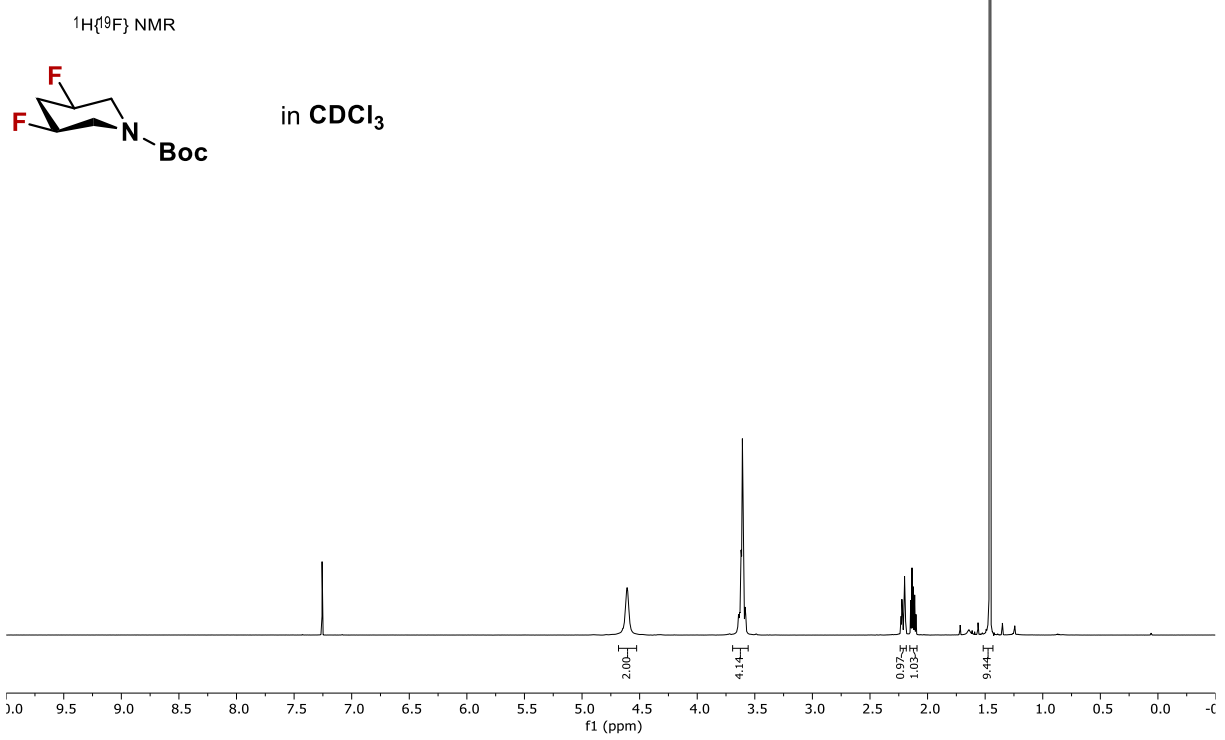

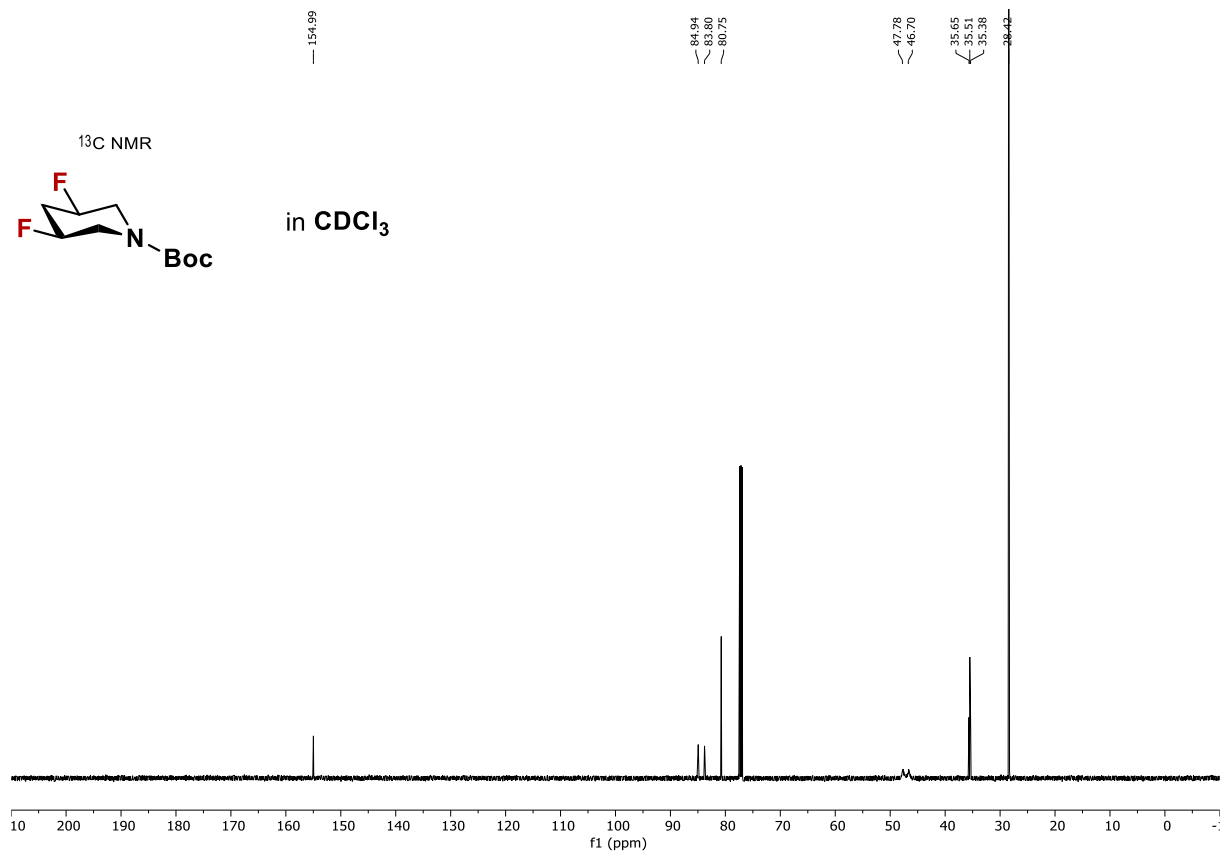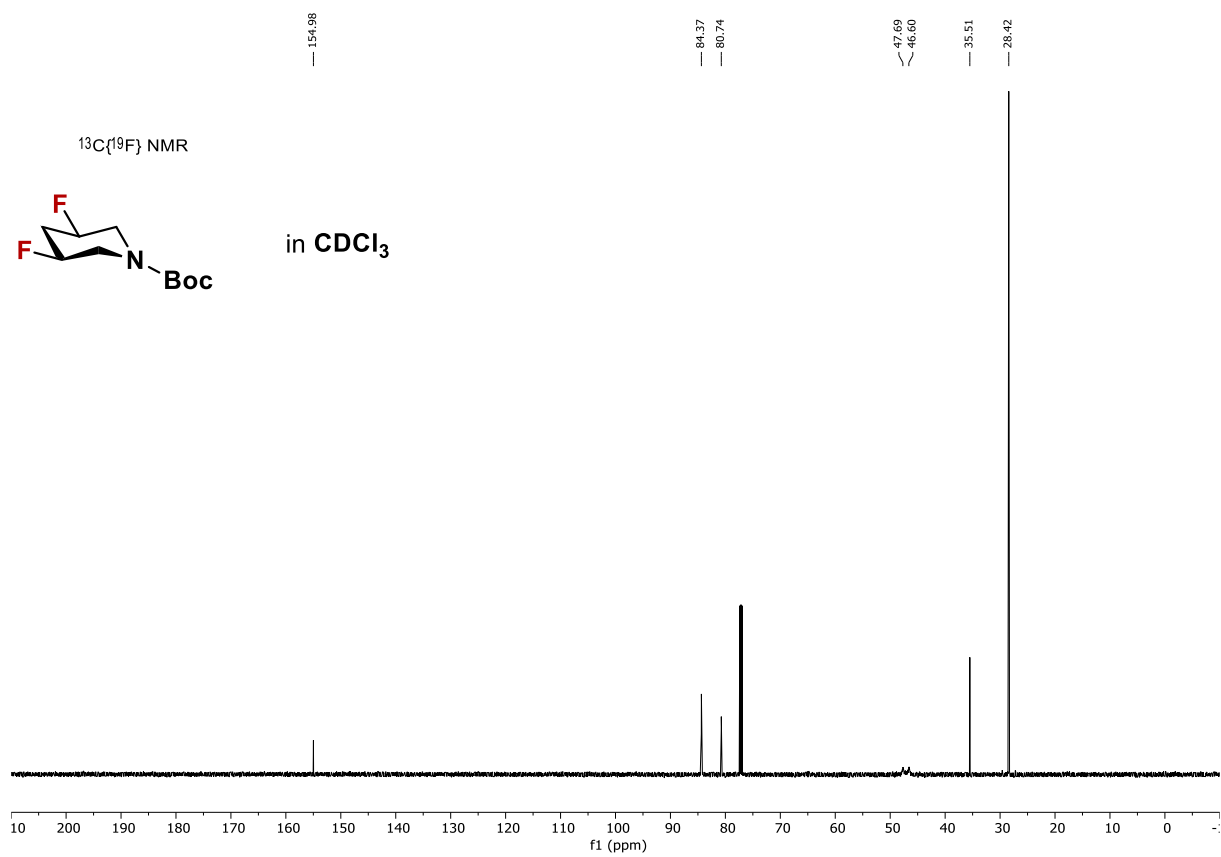

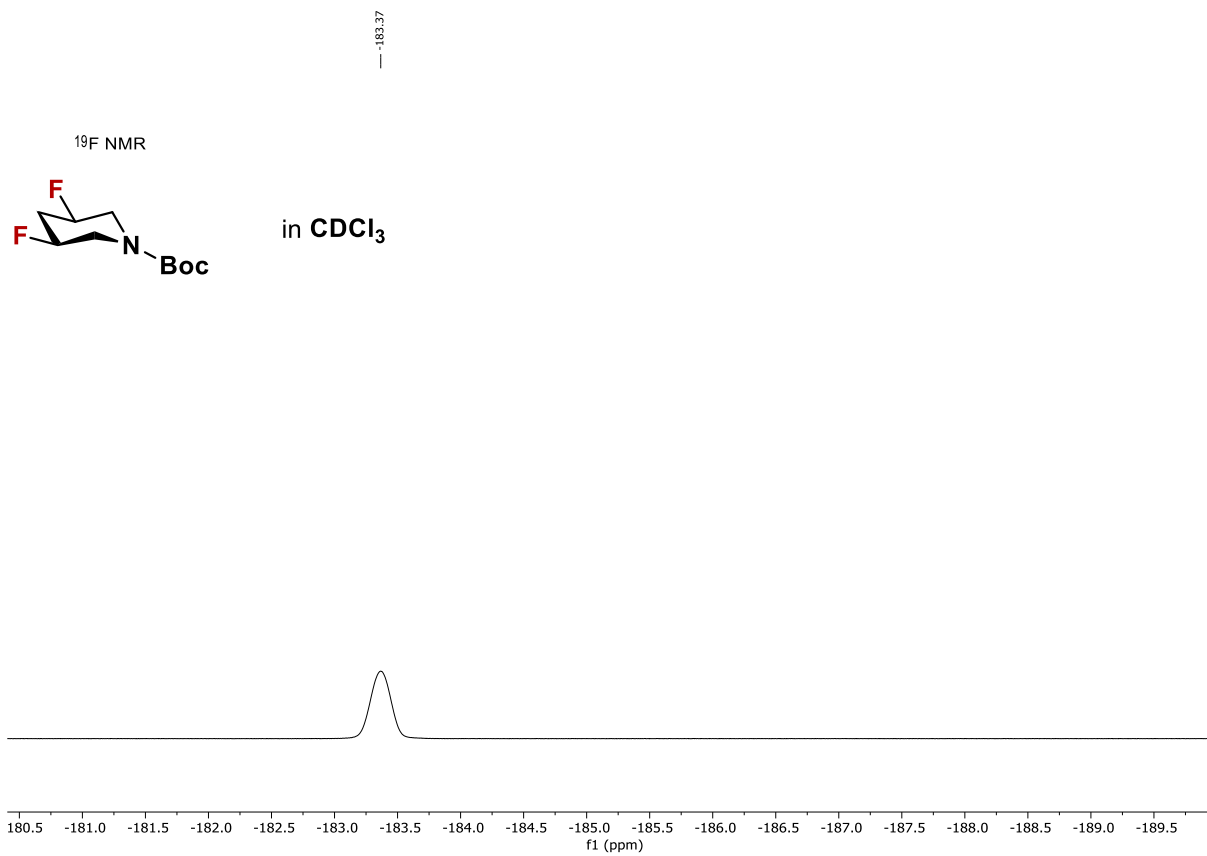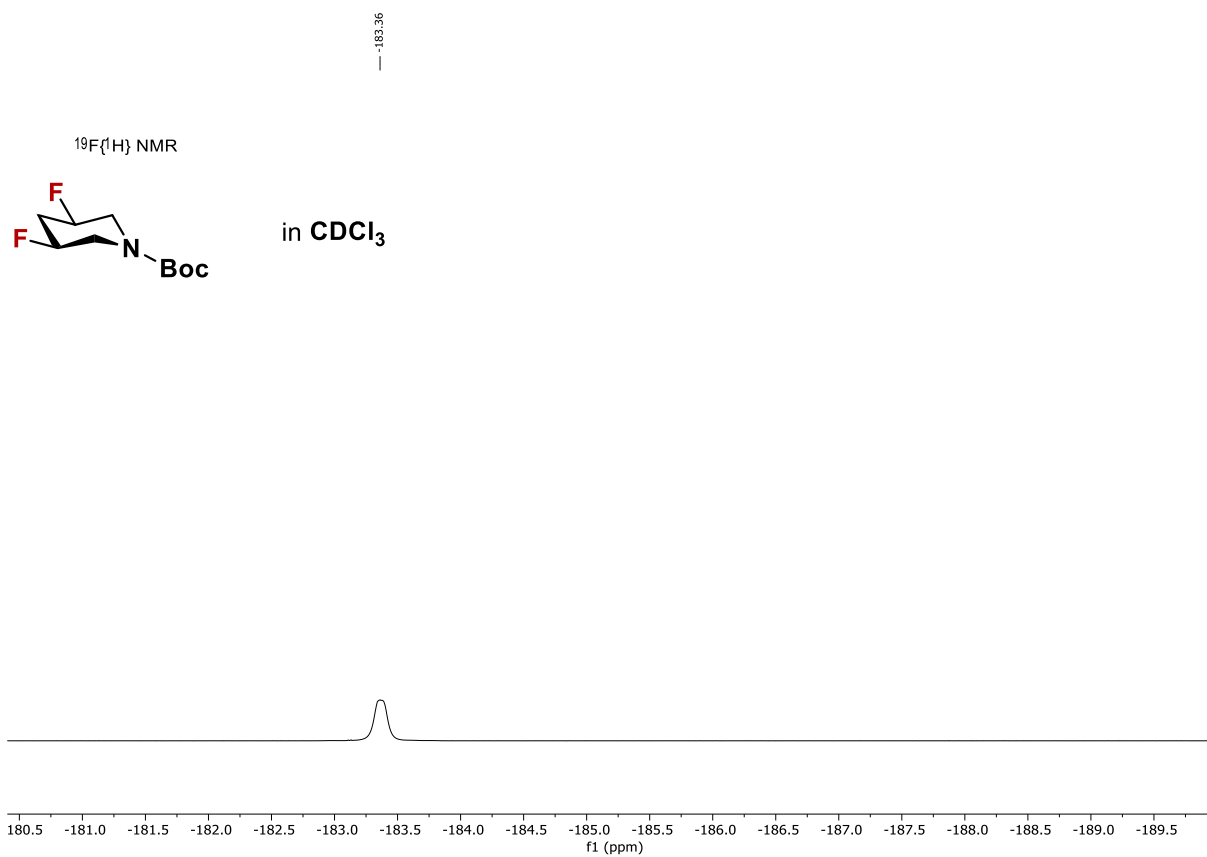

<sup>1</sup>H NMR

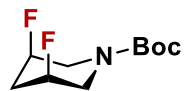

in DMSO

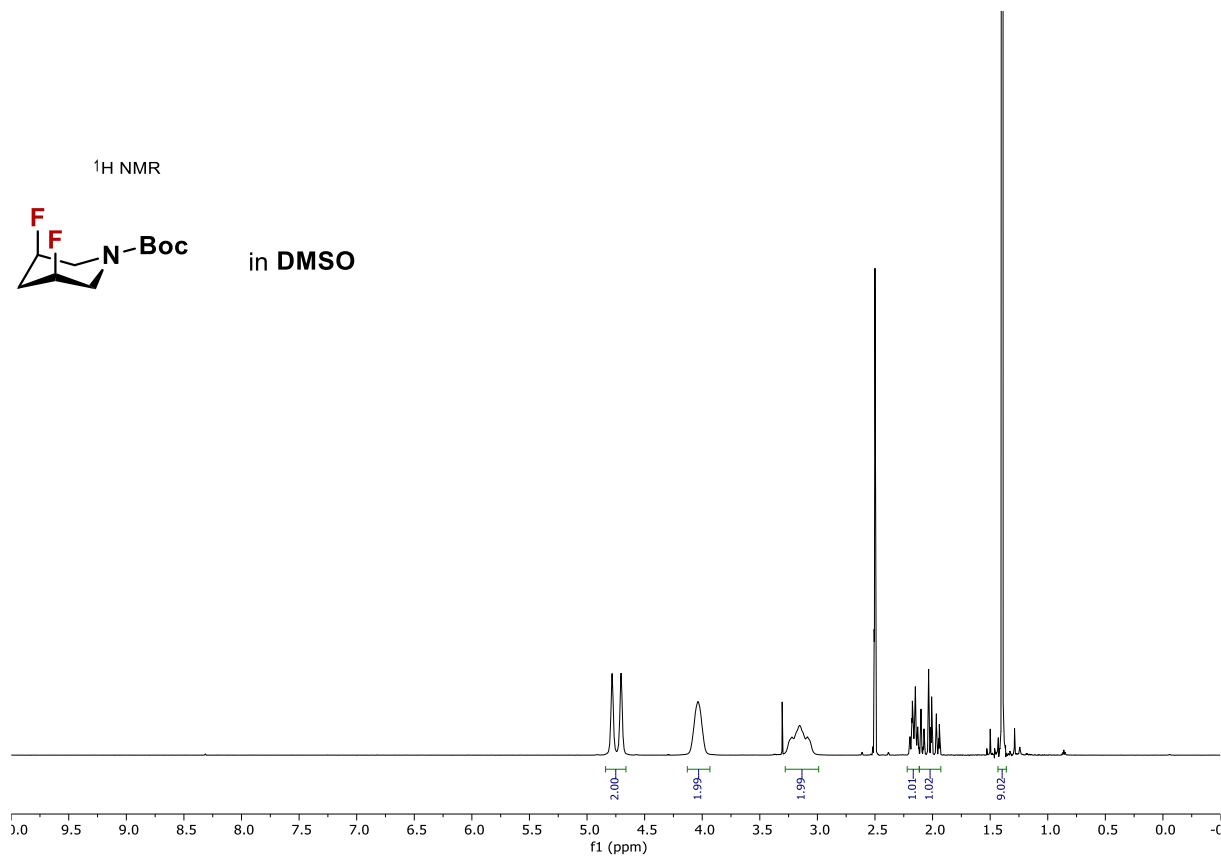

<sup>1</sup>H{<sup>19</sup>F} NMR

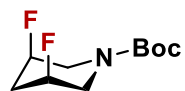

in DMSO

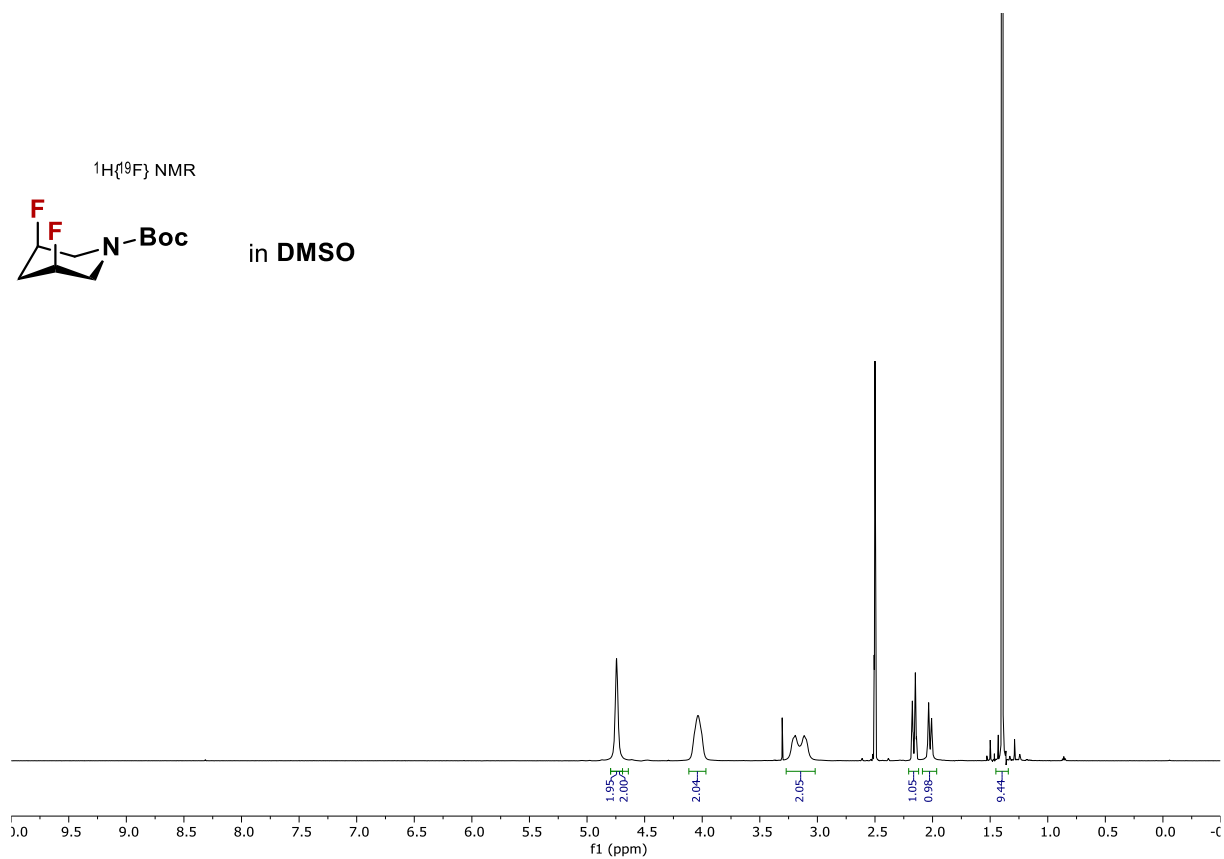

Supplement: CHEM-26-6141-s001.pdf [file CHEM-26-6141-s001.pdf]
